# Supplementary material
Source: publisher figshare collection journal article supplement (https://diabetesjournals.figshare.com/ndownloader/files/25185917)
Supplement: Supplementary file 1 [file 25185917]

## Sheet: Table S1
S1. Lipidome differential abundance analysis: Cluster III-IV vs I-II at Visit -3
Compound Name	InChiKeys	Pubchem ID	SMILES	pvalue	foldchange
CE 18:1	RJECHNNFRHZQKU-RMUVNZEASA-N	5283632	CCCCCCCC/C=C\CCCCCCCC(=O)O[C@H]1CC[C@@]2([C@H]3CC[C@]4([C@H]([C@@H]3CC=C2C1)CC[C@@H]4[C@H](C)CCCC(C)C)C)C	4.39325e-09	0.75137
CE 18:2	NAACPBBQTFFYQB-LJAITQKLSA-N	5287939	CCCCC/C=C\C/C=C\CCCCCCCC(=O)O[C@H]1CC[C@@]2([C@H]3CC[C@]4([C@H]([C@@H]3CC=C2C1)CC[C@@H]4[C@H](C)CCCC(C)C)C)C	5.93554e-13	0.693041
CE 18:3	FYMCIBHUFSIWCE-WVXFKAQASA-N	6436907	CC/C=C\C/C=C\C/C=C\CCCCCCCC(=O)O[C@H]1CC[C@@]2([C@H]3CC[C@]4([C@H]([C@@H]3CC=C2C1)CC[C@@H]4[C@H](C)CCCC(C)C)C)C	8.75671e-06	0.742769
CE 20:4	IMXSFYNMSOULQS-BEDFLICRSA-N	6479222	CCCCC/C=C\C/C=C\C/C=C\C/C=C\CCCC(=O)O[C@H]1CC[C@@]2([C@H]3CC[C@]4([C@H]([C@@H]3CC=C2C1)CC[C@@H]4[C@H](C)CCCC(C)C)C)C	0.110328	0.917769
CE 22:6	VOEVEGPMRIYYKC-HNJOWPRISA-N	14274978	CC/C=C\C/C=C\C/C=C\C/C=C\C/C=C\C/C=C\CCC(=O)O[C@H]1CC[C@@]2([C@H]3CC[C@]4([C@H]([C@@H]3CC=C2C1)CC[C@@H]4[C@H](C)CCCC(C)C)C)C	0.00153183	0.763868
Ceramide d18:1/23:0	NAJHAHQNQCNWOP-PUYNVXOJSA-N	52931115	CCCCCCCCCCCCCCCCCCCCCCC(=O)N[C@@H](CO)[C@@H](/C=C/CCCCCCCCCCCCC)O	0.0395542	1.10094
Ceramide d40:1	KEPQASGDXIEOIL-GLQCRSEXSA-N	5283567	CCCCCCCCCCCCCCCCCCCCCC(=O)N[C@@H](CO)[C@@H](/C=C/CCCCCCCCCCCCC)O	0.000527697	1.14142
Ceramide d42:1	ZJVVOYPTFQEGPH-AUTSUKAISA-N	5283571	CCCCCCCCCCCCCCCCCCCCCCCC(=O)N[C@@H](CO)[C@@H](/C=C/CCCCCCCCCCCCC)O	0.032614	1.07338
Ceramide d42:2	VJSBNBBOSZJDKB-KPEYJIHVSA-N	5283568	CCCCCCCCCCCCC/C=C/[C@H]([C@H](CO)NC(=O)CCCCCCCCCCCCC/C=C\CCCCCCCC)O	0.889757	0.989796
Cer (d18:1/16:0)	YDNKGFDKKRUKPY-TURZORIXSA-N	5283564	CCCCCCCCCCCCCCCC(=O)N[C@@H](CO)[C@@H](/C=C/CCCCCCCCCCCCC)O	0.000999598	1.1319
Cholesterol	HVYWMOMLDIMFJA-DPAQBDIFSA-N	5997	C[C@H](CCCC(C)C)[C@H]1CC[C@@H]2[C@@]1(CC[C@H]3[C@H]2CC=C4[C@@]3(CC[C@@H](C4)O)C)C	0.38498	0.993437
DG 32:0	JEJLGIQLPYYGEE-XIFFEERXSA-N	644078	CCCCCCCCCCCCCCCC(=O)OC[C@H](CO)OC(=O)CCCCCCCCCCCCCCC	2.72335e-11	1.53842
DG 34:0	VYQDALBEQRZDPL-DHUJRADRSA-N	3246945	CCCCCCCCCCCCCCCCCC(=O)OC[C@H](CO)OC(=O)CCCCCCCCCCCCCCC	1.27986e-08	1.29519
DG 34:1	YEJYLHKQOBOSCP-OZKTZCCCSA-N	5282283	CCCCCCCCCCCCCCCC(=O)OC[C@H](CO)OC(=O)CCCCCCC/C=C\CCCCCCCC	1.52495e-08	1.56716
DG 36:0	UHUSDOQQWJGJQS-UHFFFAOYSA-N	102615	CCCCCCCCCCCCCCCCCC(=O)OCC(CO)OC(=O)CCCCCCCCCCCCCCCCC	0.532202	0.979919
DG 36:2	AFSHUZFNMVJNKX-LLWMBOQKSA-N	9543716	CCCCCCCC/C=C\CCCCCCCC(=O)OC[C@H](CO)OC(=O)CCCCCCC/C=C\CCCCCCCC	9.23574e-07	1.46313
DG 36:3	BLZVZPYMHLXLHG-JOBMVARSSA-N	9543722	CCCCCCCC/C=C\CCCCCCCC(=O)OC[C@H](CO)OC(=O)CCCCCCC/C=C\C/C=C\CCCCC	1.55022e-09	1.53684
DG 38:5	GRGDLDNREYVILP-CNWVQWJYSA-N	9543784	CCCCC/C=C\C/C=C\CCCCCCCCCC(=O)O[C@@H](CO)COC(=O)CCCCCCC/C=C\C/C=C\C/C=C\CC	0.000114691	1.60148
DG 38:6	YDVDXUYJFQLPEG-CTHJWPIASA-N	9543795	CCCCC/C=C\C/C=C\C/C=C\CCCCCCC(=O)O[C@@H](CO)COC(=O)CCCCCCC/C=C\C/C=C\C/C=C\CC	4.52128e-05	1.91111
DG 40:1	VFUWCRMMTRWZAT-JLDYGAOKSA-N	9543793	CCCCCCCCCCCCCCCCCCCC(=O)OC[C@H](CO)OC(=O)CCCCCCCCC/C=C\CCCCCCCC	0.773387	0.98579
FA 16:0	IPCSVZSSVZVIGE-UHFFFAOYSA-N	985	CCCCCCCCCCCCCCCC(=O)O	0.21574	1.06423
FA 16:1	SECPZKHBENQXJG-FPLPWBNLSA-N	445638	CCCCCC/C=C\CCCCCCCC(=O)O	0.854141	0.963199
FA 18:0	QIQXTHQIDYTFRH-UHFFFAOYSA-N	5281	CCCCCCCCCCCCCCCCCC(=O)O	0.27671	1.07438
FA 18:1	ZQPPMHVWECSIRJ-KTKRTIGZSA-N	445639	CCCCCCCC/C=C\CCCCCCCC(=O)O	0.648159	1.05922
FA 22:4	TWSWSIQAPQLDBP-DOFZRALJSA-N	5497181	CCCCC/C=C\C/C=C\C/C=C\C/C=C\CCCCCC(=O)O	0.21505	1.07286
GlcCer d18:1/22:0	YIGARKIIFOHVPF-YAEABVQUSA-N	6321359	CCCCCCCCCCCCCCCCCCCCCC(=O)N[C@@H](CO[C@H]1C(C([C@@H]([C@H](O1)CO)O)O)O)[C@@H](/C=C/CCCCCCCCCCCCC)O	0.900131	1.00588
GlcCer d18:1/24:0	POQRWMRXUOPCLD-AAAFHMTMSA-N	6321361	CCCCCCCCCCCCCCCCCCCCCCCC(=O)N[C@@H](CO[C@H]1C(C([C@@H]([C@H](O1)CO)O)O)O)[C@@H](/C=C/CCCCCCCCCCCCC)O	0.889757	1.0069
GlcCer d18:1/24:1	WBOZIXHPUPAOIA-RBELZSLISA-N	6321360	CCCCCCCCCCCCC/C=C/[C@H]([C@H](CO[C@H]1C(C([C@@H]([C@H](O1)CO)O)O)O)NC(=O)CCCCCCCCCCCCC/C=C\CCCCCCCC)O	0.239499	0.931431
LPC 18:0	IHNKQIMGVNPMTC-RUZDIDTESA-N	497299	CCCCCCCCCCCCCCCCCC(=O)OC[C@H](COP(=O)([O-])OCC[N+](C)(C)C)O	0.0631411	1.11036
LPC 18:1	YAMUFBLWGFFICM-PTGWMXDISA-N	16081932	CCCCCCCC/C=C\CCCCCCCC(=O)OC[C@H](COP(=O)([O-])OCC[N+](C)(C)C)O	0.0302792	1.11635
LPC 18:2	SPJFYYJXNPEZDW-FTJOPAKQSA-N	11005824	CCCCC/C=C\C/C=C\CCCCCCCC(=O)OC[C@H](COP(=O)([O-])OCC[N+](C)(C)C)O	1.27942e-05	1.31281
LPC 20:0	UATOAILWGVYRQS-HHHXNRCGSA-N	24779473	CCCCCCCCCCCCCCCCCCCC(=O)OC[C@H](COP(=O)([O-])OCC[N+](C)(C)C)O	0.239499	1.06778
LPC 20:1	GJTDRNFWIDPARY-GTPZACKGSA-N	24779475	CCCCCCCCCC/C=C\CCCCCCCC(=O)OC[C@H](COP(=O)([O-])OCC[N+](C)(C)C)O	0.690852	1.03226
LPC 20:2	YYQVCMMXPIJVHY-ZOIJLGJPSA-N	52924053	CCCCC/C=C\C/C=C\CCCCCCCCCC(=O)OC[C@H](COP(=O)([O-])OCC[N+](C)(C)C)O	0.00606857	1.16691
LPE 18:0	BBYWOYAFBUOUFP-JOCHJYFZSA-N	46891690	CCCCCCCCCCCCCCCCCC(=O)OC[C@H](COP(=O)([O-])OCC[NH3+])O	0.147429	1.14798
LPE 18:2	DBHKHNGBVGWQJE-USWSLJGRSA-N	52925130	CCCCC/C=C\C/C=C\CCCCCCCC(=O)OC[C@H](COP(=O)(O)OCCN)O	1.34058e-08	1.4898
LPE 20:0	HEQMDGOBDIGJOC-XMMPIXPASA-N	52925131	CCCCCCCCCCCCCCCCCCCC(=O)OC[C@H](COP(=O)(O)OCCN)O	0.459218	0.9913
LPE 20:1	JEAGLCKGAKACCE-OPSAWKISSA-N	52925139	CCCCCCCC/C=C\CCCCCCCCCC(=O)OC[C@H](COP(=O)(O)OCCN)O	0.0208254	1.13625
PC 16:0/16:0	KILNVBDSWZSGLL-KXQOOQHDSA-N	452110	CCCCCCCCCCCCCCCC(=O)OC[C@H](COP(=O)([O-])OCC[N+](C)(C)C)OC(=O)CCCCCCCCCCCCCCC	2.95063e-06	1.1481
PC 18:1/16:0	WTJKGGKOPKCXLL-VYOBOKEXSA-N	5497103	CCCCCCCCCCCCCCCC(=O)OC[C@H](COP(=O)([O-])OCC[N+](C)(C)C)OC(=O)CCCCCCC/C=C\CCCCCCCC	0.510341	1.01528
PC 28:0	CITHEXJVPOWHKC-UUWRZZSWSA-N	5459377	CCCCCCCCCCCCCC(=O)OC[C@H](COP(=O)([O-])OCC[N+](C)(C)C)OC(=O)CCCCCCCCCCCCC	6.98933e-05	1.59087
PC 30:0	RFVFQQWKPSOBED-PSXMRANNSA-N	129657	CCCCCCCCCCCCCCCC(=O)O[C@H](COC(=O)CCCCCCCCCCCCC)COP(=O)([O-])OCC[N+](C)(C)C	2.84599e-06	1.42933
PC 32:1	QIBZFHLFHCIUOT-NPBIGWJUSA-N	6443788	CCCCCCCCCCCCCCCC(=O)OC[C@H](COP(=O)([O-])OCC[N+](C)(C)C)OC(=O)CCCCCCC/C=C\CCCCCC	0.0409207	1.14429
PC 32:2	GPWHCUUIQMGELX-VHQDNGOZSA-N	24778764	CCCCCC/C=C\CCCCCCCC(=O)OC[C@H](COP(=O)([O-])OCC[N+](C)(C)C)OC(=O)CCCCCCC/C=C\CCCCCC	0.00506276	1.20445
PC 32:3	UXEFXNOSLOCOLX-ZCHSEWAGSA-N	52922763	CCCCCCCCCCCCCC(=O)O[C@H](COC(=O)CCCC/C=C\C/C=C\C/C=C\CCCCC)COP(=O)([O-])OCC[N+](C)(C)C	7.33714e-05	1.33875
PC 33:1	GXTATYLPYLLNLV-MGIDVFSBSA-N	24778662	CCCCCCCCCCCCCCC(=O)OC[C@H](COP(=O)([O-])OCC[N+](C)(C)C)OC(=O)CCCCCCCCC/C=C\CCCCCC	0.245764	1.08921
PC 34:0	PZNPLUBHRSSFHT-RRHRGVEJSA-N	24778686	CCCCCCCCCCCCCCCCCC(=O)O[C@H](COC(=O)CCCCCCCCCCCCCCC)COP(=O)([O-])OCC[N+](C)(C)C	7.39166e-09	1.28768
PC 34:2	JLPULHDHAOZNQI-ZTIMHPMXSA-N	5287971	CCCCCCCCCCCCCCCC(=O)OC[C@H](COP(=O)([O-])OCC[N+](C)(C)C)OC(=O)CCCCCCC/C=C\C/C=C\CCCCC	0.000618642	1.03993
PC 34:3	CNNSEHUKQJCGTE-UPPWDXJYSA-N	24778699	CCCCCCCCCCCCCCCC(=O)OC[C@H](COP(=O)([O-])OCC[N+](C)(C)C)OC(=O)CCCC/C=C\C/C=C\C/C=C\CCCCC	0.682969	0.975954
PC 35:2	ZSKWZJYUVZYDQU-WESJWMGVSA-N	52922491	CCCCCCCCCCCCCCCCC(=O)OC[C@H](COP(=O)([O-])OCC[N+](C)(C)C)OC(=O)CCCCCCC/C=C\C/C=C\CCCCC	0.000167163	1.19886
PC 36:0	NRJAVPSFFCBXDT-HUESYALOSA-N	94190	CCCCCCCCCCCCCCCCCC(=O)OC[C@H](COP(=O)([O-])OCC[N+](C)(C)C)OC(=O)CCCCCCCCCCCCCCCCC	0.1701	1.06482
PC 36:1	ATHVAWFAEPLPPQ-VRDBWYNSSA-N	24778825	CCCCCCCCCCCCCCCCCC(=O)OC[C@H](COP(=O)([O-])OCC[N+](C)(C)C)OC(=O)CCCCCCC/C=C\CCCCCCCC	0.00244662	1.12656
PC 36:2	SNKAWJBJQDLSFF-NVKMUCNASA-N	10350317	CCCCCCCC/C=C\CCCCCCCC(=O)OC[C@H](COP(=O)([O-])OCC[N+](C)(C)C)OC(=O)CCCCCCC/C=C\CCCCCCCC	0.0014886	1.1494
PC 36:3	BXRLDROZWDUSGM-ZRYFCQOPSA-N	24778937	CCCCCCCC/C=C\CCCCCCCC(=O)OC[C@H](COP(=O)([O-])OCC[N+](C)(C)C)OC(=O)CCCC/C=C\C/C=C\CCCCCCCC	0.204256	1.0587
PC 36:4	IIZPXYDJLKNOIY-JXPKJXOSSA-N	10747814	CCCCCCCCCCCCCCCC(=O)OC[C@H](COP(=O)([O-])OCC[N+](C)(C)C)OC(=O)CCC/C=C\C/C=C\C/C=C\C/C=C\CCCCC	3.5632e-07	1.13705
PC 36:5	DYDDZDMJSQYFGN-OIVUZXIWSA-N	24778771	CCCCCC/C=C\CCCCCCCC(=O)OC[C@H](COP(=O)([O-])OCC[N+](C)(C)C)OC(=O)CCC/C=C\C/C=C\C/C=C\C/C=C\CCCCC	0.106268	0.984382
PC 36:6	SPWBDEZMKCRQSX-NGPPOSSDSA-N	52922847	CCCCC/C=C\C/C=C\C/C=C\CCCCC(=O)O[C@H](COC(=O)CCCCCCC/C=C\C/C=C\C/C=C\CC)COP(=O)([O-])OCC[N+](C)(C)C	0.0214587	1.19953
PC 37:2	MCZUABDVGPPWPM-HJTCUGKVSA-N	52922735	CCCCCCCCCCCCCCCCCCC(=O)O[C@H](COC(=O)CCCCCCC/C=C\C/C=C\CCCCC)COP(=O)([O-])OCC[N+](C)(C)C	1.17016e-05	1.20242
PC 37:3	OOYQEEUUQRMQKL-JUUDQZDJSA-N	52922851	CCCCCCCCCCCCCCCCCCC(=O)O[C@H](COC(=O)CCCCCCC/C=C\C/C=C\C/C=C\CC)COP(=O)([O-])OCC[N+](C)(C)C	0.931477	1.0071
PC 37:4	QRPUCJXFPYFTMB-FBFLODOBSA-N	52922853	CCCCCCCCC/C=C\CCCCCCCC(=O)O[C@H](COC(=O)CCCCCCC/C=C\C/C=C\C/C=C\CC)COP(=O)([O-])OCC[N+](C)(C)C	1.7393e-05	1.24407
PC 38:2	KXXLFCAPKGRXBT-FMJYHZMHSA-N	24779263	CCCCCCCCCCCCCCCCCCCC(=O)OC[C@H](COP(=O)([O-])OCC[N+](C)(C)C)OC(=O)CCCCCCC/C=C\C/C=C\CCCCC	0.000118351	1.1572
PC 38:3	OJHJKEBRZSDTTL-VHWCKNCUSA-N	52922741	CCCCCCCC/C=C\CCCCCCCCCC(=O)O[C@H](COC(=O)CCCCCCC/C=C\C/C=C\CCCCC)COP(=O)([O-])OCC[N+](C)(C)C	0.891668	0.986946
PC 38:4	DNYKSJQVBCVGOF-LCKGXUDJSA-N	52923291	CCCCCCCCCCCCCCCCCC(=O)O[C@H](COC(=O)CCC/C=C\C/C=C\C/C=C\C/C=C\CCCCC)COP(=O)([O-])OCC[N+](C)(C)C	3.82245e-08	1.17685
PC 38:5	YLWBKBDNHWQEFU-YJXJLLHLSA-N	53479033	CCCCCC/C=C\CCCCCCCCCC(=O)O[C@H](COC(=O)CCC/C=C\C/C=C\C/C=C\C/C=C\CCCCC)COP(=O)([O-])OCC[N+](C)(C)C	0.599162	1.04983
PC 38:6	PLZBTDKJYHXIEW-DZUXOTHRSA-N	52923295	CCCCC/C=C\C/C=C\CCCCCCCC(=O)O[C@H](COC(=O)CCC/C=C\C/C=C\C/C=C\C/C=C\CCCCC)COP(=O)([O-])OCC[N+](C)(C)C	0.00610674	1.14764
PC 38:8	QQNHCRBGLPDWEW-LRFGEVPTSA-N	52922865	CC/C=C\C/C=C\C/C=C\CCCCCCCC(=O)OC[C@H](COP(=O)([O-])OCC[N+](C)(C)C)OC(=O)CCC/C=C\C/C=C\C/C=C\C/C=C\C/C=C\CC	0.122465	0.814687
PC 40:2	AEUCYCQYAUFAKH-DITNKEBASA-N	24779063	CCCCCCCC/C=C\CCCCCCCCCC(=O)OC[C@H](COP(=O)([O-])OCC[N+](C)(C)C)OC(=O)CCCCCCCCC/C=C\CCCCCCCC	0.000789042	1.19345
PC 40:5	LJFKFKIYUJNFPZ-ZLFSCUDPSA-N	52923133	CCCCCCCC/C=C\CCCCCCCCCC(=O)OC[C@H](COP(=O)([O-])OCC[N+](C)(C)C)OC(=O)CCC/C=C\C/C=C\C/C=C\C/C=C\CCCCC	0.00208564	1.2738
PC 40:6	TYRTWVKQVGNGSZ-RGBTVBCDSA-N	52923195	CCCCC/C=C\C/C=C\CCCCCCCCCC(=O)OC[C@H](COP(=O)([O-])OCC[N+](C)(C)C)OC(=O)CCC/C=C\C/C=C\C/C=C\C/C=C\CCCCC	0.000232247	1.24498
PC 40:7	BPUROMFCPFGBOT-ZEGPSQTJSA-N	24778982	CCCCC/C=C\C/C=C\CCCCCCCC(=O)OC[C@H](COP(=O)([O-])OCC[N+](C)(C)C)OC(=O)CC/C=C\C/C=C\C/C=C\C/C=C\C/C=C\CCCCC	0.614843	1.03237
PC 42:1	PAHPUCKPYBHMBM-RURDTVAGSA-N	24778881	CCCCCCCCCCCCCCCCCC(=O)OC[C@H](COP(=O)([O-])OCC[N+](C)(C)C)OC(=O)CCCCCCCCCCCCC/C=C\CCCCCCCC	0.00132492	0.85131
PC 42:4	SGYNBRXEOXADHS-CIUHTZMDSA-N	24779052	CCCCCCCCCCCCCCCCCCCC(=O)OC[C@H](COP(=O)([O-])OCC[N+](C)(C)C)OC(=O)CCCCC/C=C\C/C=C\C/C=C\C/C=C\C/C=C\CC	0.121507	1.0739
PC 42:6	DSVRMAGYENFTLY-GDDYDVMSSA-N	52923651	CCCCC/C=C\C/C=C\CCCCCCCCCC(=O)O[C@H](COC(=O)CCCCC/C=C\C/C=C\C/C=C\C/C=C\CCCCC)COP(=O)([O-])OCC[N+](C)(C)C	0.278061	0.896171
PC 44:3	GZZUNXHFXFGEBB-MXZPZXETSA-N	52923541	CCCCCCCCCC/C=C\CCCCCCCCCC(=O)OC[C@H](COP(=O)([O-])OCC[N+](C)(C)C)OC(=O)CCCCCCCCCCC/C=C\C/C=C\CCCCC	0.306818	0.951613
PC 44:4	UIAAGLPOUUFIRG-ZUEQPGPOSA-N	52923481	CCCCCCCCCCCCCCCCCCCCCC(=O)OC[C@H](COP(=O)([O-])OCC[N+](C)(C)C)OC(=O)CCCCC/C=C\C/C=C\C/C=C\C/C=C\CCCCC	0.267869	1.0499
PC p34:1	OIICTMOQBYZCDA-IIKIFWEUSA-N	11125520	CCCCCCCCCCCCCCCC/C=C\OC[C@H](COP(=O)([O-])OCC[N+](C)(C)C)OC(=O)CCCCCCCCCCCCCCC	0.208447	0.953824
PC p34:2	KMNVIRCHUMQGHD-RCINKDPXSA-N	52923934	CCCCCCCCCCCCCCCC/C=C\OC[C@H](COP(=O)([O-])OCC[N+](C)(C)C)OC(=O)CCCCCCC/C=C\CCCCCC	0.0794668	0.930838
PC p34:3	QLEHHUPUHJPURI-PWYDUFMYSA-N	24779386	CCCCCCCCCCCCCC/C=C\OC[C@H](COP(=O)([O-])OCC[N+](C)(C)C)OC(=O)CCCCCCC/C=C\C/C=C\CCCCC	3.48206e-06	0.813811
PC p36:3	SOUZQPFUXRVDGK-KCTKZSJBSA-N	53481701	CCCCCCCCCCCCCCCCOC[C@H](COP(=O)([O-])OCC[N+](C)(C)C)OC(=O)CCCCCC/C=C\C/C=C\C/C=C\C/C=C\CC	0.705037	0.984466
PC p36:4	IOYKZPNDXIIXLN-LOQSCQKMSA-N	24779388	CCCCCCCCCCCCCC/C=C\OC[C@H](COP(=O)([O-])OCC[N+](C)(C)C)OC(=O)CCC/C=C\C/C=C\C/C=C\C/C=C\CCCCC	0.29515	1.04891
PC p38:3	WOSDZWBQBJHAMR-NOQLVGMBSA-N	52925093	CCCCCCCCCCCCCCCC/C=C\OC[C@H](COP(=O)(O)OCCN)OC(=O)CCCCCCCCCCC/C=C\C/C=C\CCCCC	0.0478572	1.12096
PC p38:4	BAKDTVUHENQVRW-IXXGCMLPSA-N	52925117	CCCCCCCCCCCCCCCCCC/C=C\OC[C@H](COP(=O)(O)OCCN)OC(=O)CCCCCC/C=C\C/C=C\C/C=C\CCCCC	0.345429	1.03893
PE 34:2	HBZNVZIRJWODIB-NHCUFCNUSA-N	46891780	CCCCCCCCCCCCCCCC(=O)OC[C@H](COP(=O)([O-])OCC[NH3+])OC(=O)CCCCCCC/C=C\C/C=C\CCCCC	0.000764173	1.35476
PE 36:2	DXXUYBAISOHOLM-XRIXOMQFSA-N	52924894	CCCCCCCCCCCCCCCCCC(=O)O[C@H](COC(=O)CCCCCCC/C=C\C/C=C\CCCCC)COP(=O)(O)OCCN	0.0151822	1.17878
PE 36:3	GKAFCSRKMWFPSJ-RJXNKANHSA-N	71728379	CCCCCCCC/C=C\CCCCCCCC(=O)OC[C@H](COP(=O)([O-])OCC[NH3+])OC(=O)CCCCCCC/C=C\C/C=C\CCCCC	0.158296	0.963803
PE 36:4	DUQDVNACTOXOJA-KTKXOIIHSA-N	52924875	CCCCCCCCCCCCCCCC(=O)O[C@H](COC(=O)CCC/C=C\C/C=C\C/C=C\C/C=C\CCCCC)COP(=O)(O)OCCN	0.000187413	1.25766
PE 38:2	CLPMAPXZURYSNH-CNBLIUODSA-N	9546825	CCCCCCCCCCCCCCCCCCCC(=O)OC[C@H](COP(=O)(O)OCCN)OC(=O)CCCCCCC/C=C\C/C=C\CCCCC	1.73219e-05	1.23874
PE 38:4	ANRKEHNWXKCXDB-BHFWLYLHSA-N	46891781	CCCCCCCCCCCCCCCCCC(=O)OC[C@H](COP(=O)([O-])OCC[NH3+])OC(=O)CCC/C=C\C/C=C\C/C=C\C/C=C\CCCCC	0.00224173	1.56729
PE 38:6	LFGBKOUQHCWBQI-BZGLIJSBSA-N	52924893	CCCCC/C=C\C/C=C\CCCCCCCC(=O)OC[C@H](COP(=O)(O)OCCN)OC(=O)CCC/C=C\C/C=C\C/C=C\C/C=C\CCCCC	0.0389838	1.17536
PE 40:6	FEABWDMFZNBFCT-KUVQHVNNSA-N	52924379	CCCCC/C=C\C/C=C\CCCCCCCC(=O)OC[C@H](COP(=O)(O)OCCN)OC(=O)CCCCC/C=C\C/C=C\C/C=C\C/C=C\CCCCC	0.00393279	1.17012
Phosphatidylglycerol 29:0	RYHJACYQTJIGMZ-JHOUSYSJSA-N	52926457	CCCCCCCCCCCCCCCC(=O)OC[C@H](COP(=O)(O)OC[C@H](CO)O)OC(=O)CCCCCCCCCCCC	0.0447577	1.03309
Plasmenyl-PC 34:2	IQACMFWAGALEAQ-WESJWMGVSA-N	6443157	CCCCCCCCCCCCCCCCOC[C@H](COP(=O)([O-])OCC[N+](C)(C)C)OC(=O)CCCCCCC/C=C\C/C=C\CCCCC	0.00109426	0.811781
Plasmenyl-PC 36:6	JCIBOIAZHLGPOT-YAYDGDQKSA-N	70698851	CCCCCC/C=C\CCCCCCCC/C=C\O[C@H](COC(=O)CCCC/C=C\C/C=C\C/C=C\C/C=C\CC)COP(=O)([O-])OCC[N+](C)(C)C	0.00153183	0.879872
Plasmenyl-PC 38:5	FHHVIBPVBBRLOR-IYACIECVSA-N	24779390	CCCCCCCCCCCCCCCC/C=C\OC[C@H](COP(=O)([O-])OCC[N+](C)(C)C)OC(=O)CCC/C=C\C/C=C\C/C=C\C/C=C\CCCCC	0.0165816	1.16003
Plasmenyl-PE 36:3	XVXISDREVDGQPX-PISDLAQISA-N	52925079	CCCCCCCCCCCCCCCC/C=C\OC[C@H](COP(=O)(O)OCCN)OC(=O)CCCCCCC/C=C\C/C=C\CCCCC	0.659617	1.02643
Plasmenyl-PE 36:5	UUYSKERSKRMYME-MAIXUNBTSA-N	52925126	CCCCCCCCCCCCCC/C=C\OC[C@H](COP(=O)(O)OCCN)OC(=O)CCC/C=C\C/C=C\C/C=C\C/C=C\CCCCC	0.00155935	1.20882
Plasmenyl-PE 36:6	RLLOITCRNQRGJD-DFAKUSJGSA-N	52925061	CCCCCCCCCCCCCC/C=C\OC[C@H](COP(=O)(O)OCCN)OC(=O)CCC/C=C\C/C=C\C/C=C\C/C=C\C/C=C\CC	0.900131	0.98145
Plasmenyl-PE 38:5	URPXXNCTXCOATD-FXMFQVEGSA-N	86289532	CCCCCCCCCCCCCCCC/C=C\OC[C@H](COP(=O)([O-])OCC[NH3+])OC(=O)CCC/C=C\C/C=C\C/C=C\C/C=C\CCCCC	0.000940756	1.22018
Plasmenyl-PE 38:6	KCNBSSYOJRUKOM-JALPNNRCSA-N	52925089	CCCCCCCCCCCCCCCC/C=C\OC[C@H](COP(=O)(O)OCCN)OC(=O)CCC/C=C\C/C=C\C/C=C\C/C=C\C/C=C\CC	0.0103443	1.16687
Plasmenyl-PE 38:7	WVGALBKSWOUIEZ-XNHMFJFDSA-N	5283497	CCCCCCCCCCCCCC/C=C\OC[C@H](COP(=O)(O)OCCN)OC(=O)CC/C=C\C/C=C\C/C=C\C/C=C\C/C=C\C/C=C\CC	0.0642987	1.15173
Plasmenyl-PE 40:6	CVCZYWPCMUWTNS-IXKBFPPMSA-N	52925119	CCCCCCCCCCCCCCCCCC/C=C\OC[C@H](COP(=O)(O)OCCN)OC(=O)CCC/C=C\C/C=C\C/C=C\C/C=C\C/C=C\CC	0.186277	1.14319
Plasmenyl-PE 40:7	FIJFPUAJUDAZEY-MNDXXDKYSA-N	42607458	CCCCCCCCCCCCCCCC/C=C\OC[C@H](COP(=O)(O)OCCN)OC(=O)CC/C=C\C/C=C\C/C=C\C/C=C\C/C=C\C/C=C\CC	0.0467139	1.16642
PS 38:3	BQBTWCBZEKRLFP-BGFRNLFWSA-N	52925523	CCCCCCCCCCCCCCCCCCCC(=O)O[C@H](COC(=O)CCCCCCC/C=C\C/C=C\C/C=C\CC)COP(=O)(O)OC[C@@H](C(=O)O)N	0.822245	0.995348
PS 38:4	SVOUGFFDROZBJI-DNALCEECSA-N	24779545	CCCCCCCCCCCCCCCCCC(=O)OC[C@H](COP(=O)(O)OC[C@@H](C(=O)O)N)OC(=O)CCC/C=C\C/C=C\C/C=C\C/C=C\CCCCC	0.744213	0.996391
PS 40:3	BTIQFPURPAGQHS-HOSNKBABSA-N	52925502	CCCCCCCCCCCCCCCCCCCCCC(=O)O[C@H](COC(=O)CCCC/C=C\C/C=C\C/C=C\CCCCC)COP(=O)(O)OC[C@@H](C(=O)O)N	0.00239329	1.11115
PS 40:4	GBBNRADSWUALEU-AEDAHVLISA-N	52925748	CCCCCCCCCCCCCCCCCCCC(=O)O[C@H](COC(=O)CCC/C=C\C/C=C\C/C=C\C/C=C\CCCCC)COP(=O)(O)OC[C@@H](C(=O)O)N	0.000203985	1.05086
PS 40:6	LYYHRRPTEXPVOR-SYEOQEKUSA-N	24779546	CCCCCCCCCCCCCCCCCC(=O)OC[C@H](COP(=O)(O)OC[C@@H](C(=O)O)N)OC(=O)CC/C=C\C/C=C\C/C=C\C/C=C\C/C=C\C/C=C\CC	6.39357e-05	1.08699
PS 42:5	VNQACVFLMLYTLE-WDLXSBMRSA-N	52925755	CCCCCCCCCC/C=C\CCCCCCCCCC(=O)O[C@H](COC(=O)CCC/C=C\C/C=C\C/C=C\C/C=C\CCCCC)COP(=O)(O)OC[C@@H](C(=O)O)N	0.604812	1.02401
PS 42:6	WOBFEYJLJCLDBR-NISVGTQTSA-N	52925756	CCCCC/C=C\C/C=C\CCCCCCCCCCCC(=O)O[C@H](COC(=O)CCC/C=C\C/C=C\C/C=C\C/C=C\CCCCC)COP(=O)(O)OC[C@@H](C(=O)O)N	1.37932e-06	1.19446
PS 42:8	ROCNHMAZFKRILY-PRDJOCNNSA-N	52925757	CCCCC/C=C\C/C=C\C/C=C\C/C=C\CCCCCC(=O)O[C@H](COC(=O)CCC/C=C\C/C=C\C/C=C\C/C=C\CCCCC)COP(=O)(O)OC[C@@H](C(=O)O)N	0.0167633	1.15697
PS p34:0	OHPHIZCKAAJKOG-PBSRCHRYSA-N	52926194	CCCCCCCCCCCCCCCCCC(=O)O[C@H](CO/C=C\CCCCCCCCCCCCCC)COP(=O)(O)OC[C@@H](C(=O)O)N	0.52985	0.975875
SM 33:1	LQINJRUGTUOHGS-YPDYIYJKSA-N	52931139	CCCCCCCCCCCCCCC(=O)N[C@@H](COP(=O)([O-])OCC[N+](C)(C)C)[C@@H](/C=C/CCCCCCCCCCCCC)O	0.000681672	1.18724
SM 34:0	QHZIGNLCLJPLCU-QPPIDDCLSA-N	9939965	CCCCCCCCCCCCCCC[C@H]([C@H](COP(=O)([O-])OCC[N+](C)(C)C)NC(=O)CCCCCCCCCCCCCCC)O	0.545386	1.03421
SM d16:1/20:0	LKQLRGMMMAHREN-YJFXYUILSA-N	6453725	CCCCCCCCCCCCCCCCCC(=O)N[C@@H](COP(=O)([O-])OCC[N+](C)(C)C)[C@@H](/C=C/CCCCCCCCCCCCC)O	1.63144e-06	1.19286
SM d16:1/20:1	NBEADXWAAWCCDG-QDDWGVBQSA-N	6443882	CCCCCCCCCCCCC/C=C/[C@H]([C@H](COP(=O)([O-])OCC[N+](C)(C)C)NC(=O)CCCCCCC/C=C\CCCCCCCC)O	5.25982e-05	1.15752
SM d18:1/14:0	KYICBZWZQPCUMO-PSALXKTOSA-N	11433862	CCCCCCCCCCCCC/C=C/[C@H]([C@H](COP(=O)([O-])OCC[N+](C)(C)C)NC(=O)CCCCCCCCCCCCC)O	4.72306e-06	1.31858
SM d18:1/16:0	RWKUXQNLWDTSLO-GWQJGLRPSA-N	9939941	CCCCCCCCCCCCCCCC(=O)N[C@@H](COP(=O)([O-])OCC[N+](C)(C)C)[C@@H](/C=C/CCCCCCCCCCCCC)O	0.00349156	1.06552
SM d18:1/16:1	YLWSJLLZUHSIEA-CKSUKHGVSA-N	52931235	CCCCCCCCCCCCCCCC(=O)N[C@@H](COP(=O)([O-])OCC[N+](C)(C)C)[C@@H](/C=C/CCCCCCCC/C=C\CCC)O	0.00316451	1.0851
SM d18:1/20:0	AADLTHQNYQJHQV-SVLGDMRNSA-N	44260124	CCCCCCCCCCCCCCCCCCCC(=O)N[C@@H](COP(=O)([O-])OCC[N+](C)(C)C)[C@@H](/C=C/CCCCCCCCCCCCC)O	0.000378185	1.15727
SM (d18:1/20:1)	MDRFMTLYKHBJTF-NQYLGBTJSA-N	52931179	CCCCCCCCCCCCC/C=C/[C@H]([C@H](COP(=O)([O-])OCC[N+](C)(C)C)NC(=O)CCCCCCCCC/C=C\CCCCCCCC)O	0.0325896	1.07378
SM d18:1/21:0	YXSZOBWVQJIWNE-QVDCKBILSA-N	52931193	CCCCCCCCCCCCCCCCCCCCC(=O)N[C@@H](COP(=O)([O-])OCC[N+](C)(C)C)[C@@H](/C=C/CCCCCCCCCCCCC)O	0.00527129	1.18542
SM d18:1/22:0	FJJANLYCZUNFSE-TWKUQIQBSA-N	44260125	CCCCCCCCCCCCCCCCCCCCCC(=O)N[C@@H](COP(=O)([O-])OCC[N+](C)(C)C)[C@@H](/C=C/CCCCCCCCCCCCC)O	0.239499	1.03894
SM d18:1/23:0	SXZWBNWTCVLZJN-NMIJJABPSA-N	46891684	CCCCCCCCCCCCCCCCCCCCCCC(=O)N[C@@H](COP(=O)([O-])OCC[N+](C)(C)C)[C@@H](/C=C/CCCCCCCCCCCCC)O	0.379458	1.04112
SM d18:1/24:0	QEDPUVGSSDPBMD-XTAIVQBESA-N	44260127	CCCCCCCCCCCCCCCCCCCCCCCC(=O)N[C@@H](COP(=O)([O-])OCC[N+](C)(C)C)[C@@H](/C=C/CCCCCCCCCCCCC)O	0.939645	1.00372
SM d18:2/23:0	JBDGKEXQKCCQFK-JWQIMADESA-N	52931209	CCCCCCCCCCCCCCCCCCCCCCC(=O)N[C@@H](COP(=O)([O-])OCC[N+](C)(C)C)[C@@H](/C=C/CCCCCCCC/C=C\CCC)O	0.52985	1.02884
SM d18:2/24:0	DACOGJMBYLZYDH-GXJPFUDISA-N	52931217	CCCCCCCCCCCCCCCCCCCCCCCC(=O)N[C@@H](COP(=O)([O-])OCC[N+](C)(C)C)[C@@H](/C=C/CCCCCCCC/C=C\CCC)O	0.326514	0.954436
SM (d18:2/24:1)	TXFLWJQVQCDUDZ-BRUGZULGSA-N	52931215	CCCCCCCC/C=C\CCCCCCCCCCCCCC(=O)N[C@@H](COP(=O)([O-])OCC[N+](C)(C)C)[C@@H](/C=C/CCCCCCCC/C=C\CCC)O	0.854141	0.993043
TG 42:0	DUXYWXYOBMKGIN-UHFFFAOYSA-N	11148	CCCCCCCCCCCCCC(=O)OCC(COC(=O)CCCCCCCCCCCCC)OC(=O)CCCCCCCCCCCCC	8.26063e-12	4.60867
TG 44:1	UZLGGKDLJGDGEY-WVSHCNQOSA-N	56936554	CCCCCCCCCCCCCC(=O)OC[C@H](COC(=O)CCCCCCC/C=C\CCCCCC)OC(=O)CCCCCCCCCCCCC	3.67581e-14	5.4583
TG 46:0	JWVXCFSNEOMSHH-YACUFSJGSA-N	91865745	CCCCCCCCCCCCCCCC(=O)OC[C@@H](COC(=O)CCCCCCCCCCCCC)OC(=O)CCCCCCCCCCCCCCC	7.77014e-14	3.16798
TG 46:1	RSDIQTNCDWUNDP-JHXSWNAYSA-N	56936558	CCCCCCCCCCCCCC(=O)OC[C@H](COC(=O)CCCCCCC/C=C\CCCCCCCC)OC(=O)CCCCCCCCCCCCC	1.14426e-13	4.27926
TG 46:2	XUEMVUXNOCIHLG-MOFPORNTSA-N	56936582	CCCCCCCCCCCCCC(=O)OC[C@H](COC(=O)CCCCCCC/C=C\CCCCCC)OC(=O)CCCCCCC/C=C\CCCCCC	2.68446e-14	4.55974
TG 46:3	AQARPXOEHQBBQN-OJJDTYCWSA-N	56936561	CCCCCCCCCCCCCC(=O)OC[C@H](COC(=O)CCCCCCC/C=C\C/C=C\C/C=C\CC)OC(=O)CCCCCCCCCCCCC	1.12366e-15	3.95812
TG 48:0	PVNIQBQSYATKKL-UHFFFAOYSA-N	11147	CCCCCCCCCCCCCCCC(=O)OCC(COC(=O)CCCCCCCCCCCCCCC)OC(=O)CCCCCCCCCCCCCCC	3.32048e-11	2.07289
TG 48:1	FEKLSEFRUGWUOS-DLOIZKPKSA-N	9543986	CCCCCCCCCCCCCCCC(=O)OC[C@H](COC(=O)CCCCCCC/C=C\CCCCCC)OC(=O)CCCCCCCCCCCCCCC	1.76829e-15	2.52201
TG 48:2	RUOVJPPUXXFZPC-YZEIBMOJSA-N	9543987	CCCCCCCCCCCCCCCC(=O)OC[C@H](COC(=O)CCCCCCC/C=C\CCCCCC)OC(=O)CCCCCCC/C=C\CCCCCC	4.86099e-16	3.24138
TG 48:3	SKGWNZXOCSYJQL-BUTYCLJRSA-N	9543989	CCCCCC/C=C\CCCCCCCC(=O)OCC(OC(=O)CCCCCCC/C=C\CCCCCC)COC(=O)CCCCCCC/C=C\CCCCCC	1.61229e-14	3.99159
TG 49:0	TTWJTJMWHOYBPQ-ANFMRNGASA-N	9543988	CCCCCCCCCCCCCCCCC(=O)OC[C@@H](COC(=O)CCCCCCCCCCCCCCC)OC(=O)CCCCCCCCCCCCCCC	1.03046e-11	2.65809
TG 49:1	VYYGQDOPVVYUKW-UKFBYESTSA-N	9543991	CCCCCCCCCCCCCCCC(=O)OC[C@H](COC(=O)CCCCCCC/C=C\CCCCCCC)OC(=O)CCCCCCCCCCCCCCC	6.17735e-14	2.91644
TG 49:2	QZYSUBAQYSVFNX-PSMULLBHSA-N	9543993	CCCCCCCCCCCCCCCCC(=O)OC[C@@H](COC(=O)CCCCCCC/C=C\CCCCCC)OC(=O)CCCCCCC/C=C\CCCCCC	5.17733e-15	2.52694
TG 50:0	QRJMBNGGFSPTQP-BXJPYAOGSA-N	3246958	[2H]C([2H])(C([2H])(C([2H])([2H])OC(=O)CCCCCCCCCCCCCCC)OC(=O)CCCCCCCCCCCCCCCCC)OC(=O)CCCCCCCCCCCCCCC	8.9037e-13	2.99609
TG 50:1	YHMDGPZOSGBQRH-YYSBDVFPSA-N	25240460	CCCCCCCCCCCCCCCC(=O)OC[C@H](COC(=O)CCCCCCC/C=C\CCCCCCCC)OC(=O)CCCCCCCCCCCCCCC	1.78608e-12	1.5565
TG 50:2	QEZWFCZNHWUARW-XQCAQTCHSA-N	9544010	CCCCCCCCCCCCCCCCCC(=O)OC[C@@H](COC(=O)CCCCCCC/C=C\CCCCCC)OC(=O)CCCCCCC/C=C\CCCCCC	3.07654e-16	1.63981
TG 50:3	UFHNZOACKFBCOM-YXKNDSBASA-N	25240357	CCCCCCCC/C=C\CCCCCCCC(=O)OC[C@@H](COC(=O)CCCCCCC/C=C\CCCCCC)OC(=O)CCCCCCC/C=C\CCCCCC	4.20004e-20	2.38358
TG 50:4	PVMBAGXWHHZKFP-JMPJWMFJSA-N	25240359	CCCCCC/C=C\CCCCCCCC(=O)OC[C@H](COC(=O)CCCCCCC/C=C\C/C=C\CCCCC)OC(=O)CCCCCCC/C=C\CCCCCC	3.60016e-18	2.77178
TG 50:5	AFTBPUXZTDLRSP-UDQIKIEDSA-N	9544045	CCCCCC/C=C\CCCCCCCC(=O)OC[C@H](COC(=O)CCCCCCC/C=C\C/C=C\C/C=C\CC)OC(=O)CCCCCCC/C=C\CCCCCC	3.60016e-18	2.77595
TG 51:1	OZAXLAGNPZMZAD-BOEMPQCLSA-N	9544006	CCCCCCCCCCCCCCCCC(=O)OC[C@H](COC(=O)CCCCCCC/C=C\CCCCCCC)OC(=O)CCCCCCCCCCCCCCCC	1.61229e-14	2.90212
TG 51:2	NSNSZGBCOIKUBU-SZOKBDNISA-N	9544013	CCCCCCCCCCCCCCCCC(=O)OC[C@H](COC(=O)CCCCCCC/C=C\CCCCCCC)OC(=O)CCCCCCC/C=C\CCCCCCC	8.11372e-14	2.20539
TG 51:3	ISSGPXMQOMAFMJ-DMGKHJLRSA-N	9544023	CCCCCCC/C=C\CCCCCCCC(=O)OCC(OC(=O)CCCCCCC/C=C\CCCCCCC)COC(=O)CCCCCCC/C=C\CCCCCCC	6.45956e-20	2.14006
TG 51:4	IIRQXNVLAXQEKB-KBEZCZBDSA-N	9544052	CCCCCCCC/C=C\CCCCCCCC(=O)OC[C@@H](COC(=O)CCCCCCC/C=C\CCCCCC)OC(=O)CCCCCCC/C=C\C/C=C\CCCC	3.55741e-20	2.3148
TG 52:0	SDNYRTVJOFMYIW-OIVUAWODSA-N	545690	CCCCCCCCCCCCCCCCCC(=O)OC[C@@H](COC(=O)CCCCCCCCCCCCCCC)OC(=O)CCCCCCCCCCCCCCCCC	7.441e-11	2.92463
TG 52:1	NPCZZYKITFKRQZ-FQUZZJBASA-N	25240360	CCCCCCCCCCCCCCCCCC(=O)O[C@H](COC(=O)CCCCCCCCCCCCCCC)COC(=O)CCCCCCC/C=C\CCCCCCCC	3.28053e-16	2.85262
TG 52:2	KGLAHZTWGPHKFF-RISKEULASA-N	25240361	CCCCCCCCCCCCCCCC(=O)OC[C@H](COC(=O)CCCCCCC/C=C\C/C=C\CCCCC)OC(=O)CCCCCCC/C=C\CCCCCCCC	1.5364e-06	1.15934
TG 52:4	WHSWXEYWNPTUPW-HNJDVRDNSA-N	25240364	CCCCCCCC/C=C\CCCCCCCC(=O)O[C@H](COC(=O)CCCCCCC/C=C\CCCCCC)COC(=O)CCCCCCC/C=C\C/C=C\CCCCC	1.48372e-10	1.58867
TG 52:5	CQZAAIKPSLHIBC-KDJOUNIJSA-N	25240366	CCCCCC/C=C\CCCCCCCC(=O)OC[C@H](COC(=O)CCCCCCC/C=C\C/C=C\CCCCC)OC(=O)CCCCCCC/C=C\C/C=C\CCCCC	2.57094e-09	1.81489
TG 53:0	ZJUXHXMIKPSINE-IONAWPRUSA-N	9544181	CCCCCCCCCCCCCCCCCCCCC(=O)OC[C@@H](COC(=O)CCCCCCCCCCCCCCC)OC(=O)CCCCCCCCCCCCCCC	3.45867e-11	2.05272
TG 53:1	WWJIBIGWKGFVAQ-JNSYTQKUSA-N	9544081	CCCCCCCCCCCCCCCCCC(=O)OC[C@@H](COC(=O)CCCCCCC/C=C\CCCCCCC)OC(=O)CCCCCCCCCCCCCCCCC	1.58173e-12	3.16121
TG 53:2	RSINITWKVQRWSZ-RFVLVDBCSA-N	9544102	CCCCCCCCCCCCCCCCCC(=O)OC[C@@H](COC(=O)CCCCCCC/C=C\C/C=C\CCCC)OC(=O)CCCCCCCCCCCCCCCCC	3.07608e-14	2.0061
TG 53:3	ZNQBEJJYVJSZLM-LEDQTTRKSA-N	9544126	CCCCCCCC/C=C\CCCCCCCC(=O)OC[C@@H](COC(=O)CCCCCCC/C=C\CCCCCCC)OC(=O)CCCCCCC/C=C\CCCCCCCC	2.13678e-17	2.13329
TG 53:4	BMSDHYZLQWTKSQ-LSJAAEOESA-N	9544152	CCCCCCCC/C=C\CCCCCCCC(=O)OC[C@@H](COC(=O)CCCCCCC/C=C\C/C=C\CCCC)OC(=O)CCCCCCC/C=C\CCCCCCCC	3.08125e-18	1.85589
TG 53:5	QHYAATSKYBYSLG-BXDFBOBBSA-N	9544183	CCCCCCC/C=C\CCCCCCCC(=O)OC[C@H](COC(=O)CCCCCCC/C=C\C/C=C\CCCCC)OC(=O)CCCCCCC/C=C\C/C=C\CCCCC	3.38268e-13	2.08498
TG 54:0	DCXXMTOCNZCJGO-UHFFFAOYSA-N	11146	CCCCCCCCCCCCCCCCCC(=O)OCC(COC(=O)CCCCCCCCCCCCCCCCC)OC(=O)CCCCCCCCCCCCCCCCC	1.02292e-06	1.71883
TG 54:1	YFFIQXNTTVSKJC-NZEOUKRFSA-N	16058371	CCCCCCCCCCCCCCCCCC(=O)OC[C@H](COC(=O)CCCCCCC/C=C\CCCCCCCC)OC(=O)CCCCCCCCCCCCCCCCC	4.86099e-16	3.46664
TG 54:2	RYNHWWNZNIGDAQ-BMTCQUSZSA-N	16058372	CCCCCCCCCCCCCCCCCC(=O)OC[C@H](COC(=O)CCCCCCC/C=C\CCCCCCCC)OC(=O)CCCCCCC/C=C\CCCCCCCC	7.33746e-16	2.3606
TG 54:3	PHYFQTYBJUILEZ-IUPFWZBJSA-N	5497163	CCCCCCCC/C=C\CCCCCCCC(=O)OCC(OC(=O)CCCCCCC/C=C\CCCCCCCC)COC(=O)CCCCCCC/C=C\CCCCCCCC	1.0804e-09	1.41406
TG 54:4	BRLGHZXETDWABO-NOFIOOQLSA-N	9544255	CCCCCCCCCCCCCCCCCC(=O)OC[C@H](COC(=O)CCCCCCC/C=C\C/C=C\C/C=C\CC)OC(=O)CCCCCCC/C=C\CCCCCCCC	1.56236e-06	1.4184
TG 54:5	VVEBTVMJPTZDHO-YQFZQLSNSA-N	25240373	CCCCCCCC/C=C\CCCCCCCC(=O)OC[C@H](COC(=O)CCCCCCC/C=C\C/C=C\CCCCC)OC(=O)CCCCCCC/C=C\C/C=C\CCCCC	8.93622e-10	1.69656
TG 54:6	HBOQXIRUPVQLKX-BBWANDEASA-N	5322095	CCCCC/C=C\C/C=C\CCCCCCCC(=O)OCC(OC(=O)CCCCCCC/C=C\C/C=C\CCCCC)COC(=O)CCCCCCC/C=C\C/C=C\CCCCC	8.03456e-08	1.97246
TG 54:8	BMPVTDWOWBNPJU-NYRSPQLFSA-N	9544413	CCCCC/C=C\C/C=C\C/C=C\C/C=C\CCCC(=O)OC[C@@H](COC(=O)CCCCCCC/C=C\C/C=C\CCCC)OC(=O)CCCCCCC/C=C\C/C=C\CCCC	0.00115885	1.63553
TG 56:1	OCYFAHIHWCVZKS-FHSLLVMSSA-N	9544345	CCCCCCCCCCCCCCCCCCCC(=O)OC[C@@H](COC(=O)CCCCCCCCCCCCCCCCC)OC(=O)CCCCCCC/C=C\CCCCCCCC	7.77014e-14	2.68896
TG 56:2	PDEQUPGHMOMBFC-FYEHETCMSA-N	9544390	CCCCCCCCCCCCCCCCCCCC(=O)OC[C@@H](COC(=O)CCCCCCCCCCCCCCCCC)OC(=O)CCCCCCC/C=C\C/C=C\CCCCC	8.93736e-14	2.60813
TG 56:3	QXMHHXQBBKDSSL-BAQZNRHJSA-N	9544447	CCCCCCCC/C=C\CCCCCCCCCC(=O)OC[C@@H](COC(=O)CCCCCCC/C=C\CCCCCCCC)OC(=O)CCCCCCC/C=C\CCCCCCCC	1.50809e-10	2.08248
TG 56:4	YONCDTJKIZDSKQ-IYASBODOSA-N	25240379	CCCCCCCC/C=C\CCCCCCCCCC(=O)OC[C@@H](COC(=O)CCCCCCC/C=C\CCCCCCCC)OC(=O)CCCCCCC/C=C\C/C=C\CCCCC	4.42624e-05	1.61151
TG 56:5	UHEJWASONFIROS-YPSHDQQVSA-N	25240380	CCCCCCCC/C=C\CCCCCCCCCC(=O)OC[C@@H](COC(=O)CCCCCCC/C=C\C/C=C\CCCCC)OC(=O)CCCCCCC/C=C\C/C=C\CCCCC	6.10577e-05	1.5206
TG 56:6	ZTNDRFCABXFVMY-WJTCTALZSA-N	9544625	CCCCC/C=C\C/C=C\CCCCCCCCCC(=O)OC[C@@H](COC(=O)CCCCCCC/C=C\C/C=C\CCCCC)OC(=O)CCCCCCC/C=C\C/C=C\CCCCC	0.197245	1.13607
TG 56:7	DODZUDCYRVWEOJ-GKZBLMSTSA-N	9544695	CCCCC/C=C\C/C=C\CCCCCCCC(=O)OC[C@H](COC(=O)CCCCCC/C=C\C/C=C\C/C=C\CCCCC)OC(=O)CCCCCCC/C=C\C/C=C\CCCCC	1.55798e-07	1.5887
TG 56:8	UBGUHMDKBGQUND-VPFWBQFRSA-N	9544762	CCCCCCCCCCCCCCCC(=O)OC[C@H](COC(=O)CCC/C=C\C/C=C\C/C=C\C/C=C\CCCCC)OC(=O)CCC/C=C\C/C=C\C/C=C\C/C=C\CCCCC	1.17016e-05	1.76458
TG 58:1	OWZMHFAFGQCCNI-FBXRAONGSA-N	25240381	CCCCCCCCCCCCCCCCCCCC(=O)OC[C@@H](COC(=O)CCCCCCC/C=C\CCCCCCCC)OC(=O)CCCCCCCCCCCCCCCCCCC	4.85134e-10	2.10975
TG 58:2	GXWBCAVCOMAOHT-VMCJOIRWSA-N	9545277	CCCCC/C=C\C/C=C\CCCCCCCC(=O)OC[C@H](COC(=O)CCC/C=C\C/C=C\C/C=C\C/C=C\CCCCC)OC(=O)CCC/C=C\C/C=C\C/C=C\C/C=C\CCCCC	5.25379e-11	2.16152
TG 58:3	RFMSTHTUAZETPD-JJPHLYBUSA-N	9544748	CCCCCCCC/C=C\CCCCCCCCCC(=O)OC[C@@H](COC(=O)CCCCCCC/C=C\CCCCCCCC)OC(=O)CCCCCCCCC/C=C\CCCCCCCC	2.0295e-11	2.36549
TG 58:4	CCKRHDUCFMOBKX-AAINFQTBSA-N	9544835	CCCCCCCCCCCCCCCCCCCC(=O)O[C@H](COC(=O)CCCCCCCCCCCCCCCCC)COC(=O)CCC/C=C\C/C=C\C/C=C\C/C=C\CCCCC	2.86e-09	2.13511
TG 58:6	GSNFRUMSEHHPSY-LCXCSEBNSA-N	9544977	CCCCCCCC/C=C\CCCCCCCCCC(=O)O[C@H](COC(=O)CCCCCCC/C=C\CCCCCCCC)COC(=O)CCC/C=C\C/C=C\C/C=C\C/C=C\CCCCC	7.34448e-16	2.2725
TG 58:8	KWIGMCRWEINBIR-HUPVKWKYSA-N	9545124	CCCCCCCCCCCCCCCCCC(=O)OC[C@H](COC(=O)CCC/C=C\C/C=C\C/C=C\C/C=C\CCCCC)OC(=O)CCC/C=C\C/C=C\C/C=C\C/C=C\CCCCC	1.7393e-05	1.58189
TG 58:9	RVXFSLZMZOFGEQ-SWIIBWKZSA-N	9545200	CCCCCCCC/C=C\CCCCCCCC(=O)OC[C@H](COC(=O)CCC/C=C\C/C=C\C/C=C\C/C=C\CCCCC)OC(=O)CCC/C=C\C/C=C\C/C=C\C/C=C\CCCCC	2.03247e-07	1.7958
TG 60:1	YNDXXWKSWMKVGO-HZLQDPIMSA-N	9544965	CCCCCCCCCCCCCCCCCCCC(=O)OC[C@H](COC(=O)CCCCCCCCC/C=C\CCCCCCCC)OC(=O)CCCCCCCCCCCCCCCCCCC	4.0855e-11	1.85748
TG 60:11	ASSZWZBQIXMMKM-SYTPEAHJSA-N	9545730	CCCCC/C=C\C/C=C\C/C=C\CCCCCCC(=O)OC[C@H](COC(=O)CCC/C=C\C/C=C\C/C=C\C/C=C\CCCCC)OC(=O)CCC/C=C\C/C=C\C/C=C\C/C=C\CCCCC	0.000837528	1.48352
TG 60:2	QPNVLDQSHXVPMG-JMYPUKFOSA-N	9545040	CCCCCCCCCCCCCCCCCCCC(=O)OC[C@H](COC(=O)CCCCCCCCC/C=C\CCCCCCCC)OC(=O)CCCCCCCCC/C=C\CCCCCCCC	5.15457e-09	1.98705
TG 62:1	TZLOSVAFXBPUQT-VBMMIZSXSA-N	9545526	CCCCCCCCCCCCCCCCCCCCCC(=O)OC[C@H](COC(=O)CCCCCCCCCCCCCCCCCCC)OC(=O)CCCCCCCCC/C=C\CCCCCCCC	1.67637e-06	1.54078

## Sheet: Table S2
S2. Lipidome differential abundance analysis: Clusters III-IV vs I-II at Visit -6
Compound Name	InChiKeys	Pubchem ID	SMILES	pvalue	foldchange
CE 18:1	RJECHNNFRHZQKU-RMUVNZEASA-N	5283632	CCCCCCCC/C=C\CCCCCCCC(=O)O[C@H]1CC[C@@]2([C@H]3CC[C@]4([C@H]([C@@H]3CC=C2C1)CC[C@@H]4[C@H](C)CCCC(C)C)C)C	7.89762e-06	0.772319
CE 18:2	NAACPBBQTFFYQB-LJAITQKLSA-N	5287939	CCCCC/C=C\C/C=C\CCCCCCCC(=O)O[C@H]1CC[C@@]2([C@H]3CC[C@]4([C@H]([C@@H]3CC=C2C1)CC[C@@H]4[C@H](C)CCCC(C)C)C)C	7.37086e-07	0.704609
CE 18:3	FYMCIBHUFSIWCE-WVXFKAQASA-N	6436907	CC/C=C\C/C=C\C/C=C\CCCCCCCC(=O)O[C@H]1CC[C@@]2([C@H]3CC[C@]4([C@H]([C@@H]3CC=C2C1)CC[C@@H]4[C@H](C)CCCC(C)C)C)C	1.26683e-08	0.660296
CE 20:4	IMXSFYNMSOULQS-BEDFLICRSA-N	6479222	CCCCC/C=C\C/C=C\C/C=C\C/C=C\CCCC(=O)O[C@H]1CC[C@@]2([C@H]3CC[C@]4([C@H]([C@@H]3CC=C2C1)CC[C@@H]4[C@H](C)CCCC(C)C)C)C	0.592621	0.962253
CE 22:6	VOEVEGPMRIYYKC-HNJOWPRISA-N	14274978	CC/C=C\C/C=C\C/C=C\C/C=C\C/C=C\C/C=C\CCC(=O)O[C@H]1CC[C@@]2([C@H]3CC[C@]4([C@H]([C@@H]3CC=C2C1)CC[C@@H]4[C@H](C)CCCC(C)C)C)C	0.0169907	0.800401
Ceramide d18:1/23:0	NAJHAHQNQCNWOP-PUYNVXOJSA-N	52931115	CCCCCCCCCCCCCCCCCCCCCCC(=O)N[C@@H](CO)[C@@H](/C=C/CCCCCCCCCCCCC)O	0.813017	1.01193
Ceramide d40:1	KEPQASGDXIEOIL-GLQCRSEXSA-N	5283567	CCCCCCCCCCCCCCCCCCCCCC(=O)N[C@@H](CO)[C@@H](/C=C/CCCCCCCCCCCCC)O	0.0132881	1.10297
Ceramide d42:1	ZJVVOYPTFQEGPH-AUTSUKAISA-N	5283571	CCCCCCCCCCCCCCCCCCCCCCCC(=O)N[C@@H](CO)[C@@H](/C=C/CCCCCCCCCCCCC)O	0.239809	1.04511
Ceramide d42:2	VJSBNBBOSZJDKB-KPEYJIHVSA-N	5283568	CCCCCCCCCCCCC/C=C/[C@H]([C@H](CO)NC(=O)CCCCCCCCCCCCC/C=C\CCCCCCCC)O	0.904742	0.993306
Cer (d18:1/16:0)	YDNKGFDKKRUKPY-TURZORIXSA-N	5283564	CCCCCCCCCCCCCCCC(=O)N[C@@H](CO)[C@@H](/C=C/CCCCCCCCCCCCC)O	0.260395	1.04767
Cholesterol	HVYWMOMLDIMFJA-DPAQBDIFSA-N	5997	C[C@H](CCCC(C)C)[C@H]1CC[C@@H]2[C@@]1(CC[C@H]3[C@H]2CC=C4[C@@]3(CC[C@@H](C4)O)C)C	0.182963	0.989292
DG 32:0	JEJLGIQLPYYGEE-XIFFEERXSA-N	644078	CCCCCCCCCCCCCCCC(=O)OC[C@H](CO)OC(=O)CCCCCCCCCCCCCCC	5.33914e-07	1.4357
DG 34:0	VYQDALBEQRZDPL-DHUJRADRSA-N	3246945	CCCCCCCCCCCCCCCCCC(=O)OC[C@H](CO)OC(=O)CCCCCCCCCCCCCCC	4.24195e-05	1.26737
DG 34:1	YEJYLHKQOBOSCP-OZKTZCCCSA-N	5282283	CCCCCCCCCCCCCCCC(=O)OC[C@H](CO)OC(=O)CCCCCCC/C=C\CCCCCCCC	2.28997e-06	1.47285
DG 36:0	UHUSDOQQWJGJQS-UHFFFAOYSA-N	102615	CCCCCCCCCCCCCCCCCC(=O)OCC(CO)OC(=O)CCCCCCCCCCCCCCCCC	0.260395	1.04599
DG 36:2	AFSHUZFNMVJNKX-LLWMBOQKSA-N	9543716	CCCCCCCC/C=C\CCCCCCCC(=O)OC[C@H](CO)OC(=O)CCCCCCC/C=C\CCCCCCCC	0.00186407	1.25728
DG 36:3	BLZVZPYMHLXLHG-JOBMVARSSA-N	9543722	CCCCCCCC/C=C\CCCCCCCC(=O)OC[C@H](CO)OC(=O)CCCCCCC/C=C\C/C=C\CCCCC	0.000141613	1.30709
DG 38:5	GRGDLDNREYVILP-CNWVQWJYSA-N	9543784	CCCCC/C=C\C/C=C\CCCCCCCCCC(=O)O[C@@H](CO)COC(=O)CCCCCCC/C=C\C/C=C\C/C=C\CC	0.476711	1.10756
DG 38:6	YDVDXUYJFQLPEG-CTHJWPIASA-N	9543795	CCCCC/C=C\C/C=C\C/C=C\CCCCCCC(=O)O[C@@H](CO)COC(=O)CCCCCCC/C=C\C/C=C\C/C=C\CC	0.00313281	1.67724
DG 40:1	VFUWCRMMTRWZAT-JLDYGAOKSA-N	9543793	CCCCCCCCCCCCCCCCCCCC(=O)OC[C@H](CO)OC(=O)CCCCCCCCC/C=C\CCCCCCCC	0.888956	0.993078
FA 16:0	IPCSVZSSVZVIGE-UHFFFAOYSA-N	985	CCCCCCCCCCCCCCCC(=O)O	0.743592	0.98096
FA 16:1	SECPZKHBENQXJG-FPLPWBNLSA-N	445638	CCCCCC/C=C\CCCCCCCC(=O)O	0.757266	0.947691
FA 18:0	QIQXTHQIDYTFRH-UHFFFAOYSA-N	5281	CCCCCCCCCCCCCCCCCC(=O)O	0.602401	1.04074
FA 18:1	ZQPPMHVWECSIRJ-KTKRTIGZSA-N	445639	CCCCCCCC/C=C\CCCCCCCC(=O)O	0.526121	0.923843
FA 22:4	TWSWSIQAPQLDBP-DOFZRALJSA-N	5497181	CCCCC/C=C\C/C=C\C/C=C\C/C=C\CCCCCC(=O)O	0.349628	1.0686
GlcCer d18:1/22:0	YIGARKIIFOHVPF-YAEABVQUSA-N	6321359	CCCCCCCCCCCCCCCCCCCCCC(=O)N[C@@H](CO[C@H]1C(C([C@@H]([C@H](O1)CO)O)O)O)[C@@H](/C=C/CCCCCCCCCCCCC)O	0.695493	1.01878
GlcCer d18:1/24:0	POQRWMRXUOPCLD-AAAFHMTMSA-N	6321361	CCCCCCCCCCCCCCCCCCCCCCCC(=O)N[C@@H](CO[C@H]1C(C([C@@H]([C@H](O1)CO)O)O)O)[C@@H](/C=C/CCCCCCCCCCCCC)O	0.925936	0.996413
GlcCer d18:1/24:1	WBOZIXHPUPAOIA-RBELZSLISA-N	6321360	CCCCCCCCCCCCC/C=C/[C@H]([C@H](CO[C@H]1C(C([C@@H]([C@H](O1)CO)O)O)O)NC(=O)CCCCCCCCCCCCC/C=C\CCCCCCCC)O	0.148708	0.915453
LPC 18:0	IHNKQIMGVNPMTC-RUZDIDTESA-N	497299	CCCCCCCCCCCCCCCCCC(=O)OC[C@H](COP(=O)([O-])OCC[N+](C)(C)C)O	0.016043	1.16041
LPC 18:1	YAMUFBLWGFFICM-PTGWMXDISA-N	16081932	CCCCCCCC/C=C\CCCCCCCC(=O)OC[C@H](COP(=O)([O-])OCC[N+](C)(C)C)O	0.204669	1.07579
LPC 18:2	SPJFYYJXNPEZDW-FTJOPAKQSA-N	11005824	CCCCC/C=C\C/C=C\CCCCCCCC(=O)OC[C@H](COP(=O)([O-])OCC[N+](C)(C)C)O	0.00616298	1.20431
LPC 20:0	UATOAILWGVYRQS-HHHXNRCGSA-N	24779473	CCCCCCCCCCCCCCCCCCCC(=O)OC[C@H](COP(=O)([O-])OCC[N+](C)(C)C)O	0.402435	1.05851
LPC 20:1	GJTDRNFWIDPARY-GTPZACKGSA-N	24779475	CCCCCCCCCC/C=C\CCCCCCCC(=O)OC[C@H](COP(=O)([O-])OCC[N+](C)(C)C)O	0.304444	1.08179
LPC 20:2	YYQVCMMXPIJVHY-ZOIJLGJPSA-N	52924053	CCCCC/C=C\C/C=C\CCCCCCCCCC(=O)OC[C@H](COP(=O)([O-])OCC[N+](C)(C)C)O	0.00400274	1.21727
LPE 18:0	BBYWOYAFBUOUFP-JOCHJYFZSA-N	46891690	CCCCCCCCCCCCCCCCCC(=O)OC[C@H](COP(=O)([O-])OCC[NH3+])O	0.73157	1.03417
LPE 18:2	DBHKHNGBVGWQJE-USWSLJGRSA-N	52925130	CCCCC/C=C\C/C=C\CCCCCCCC(=O)OC[C@H](COP(=O)(O)OCCN)O	0.00554713	1.26321
LPE 20:0	HEQMDGOBDIGJOC-XMMPIXPASA-N	52925131	CCCCCCCCCCCCCCCCCCCC(=O)OC[C@H](COP(=O)(O)OCCN)O	0.887424	0.998211
LPE 20:1	JEAGLCKGAKACCE-OPSAWKISSA-N	52925139	CCCCCCCC/C=C\CCCCCCCCCC(=O)OC[C@H](COP(=O)(O)OCCN)O	0.34121	1.06193
PC 16:0/16:0	KILNVBDSWZSGLL-KXQOOQHDSA-N	452110	CCCCCCCCCCCCCCCC(=O)OC[C@H](COP(=O)([O-])OCC[N+](C)(C)C)OC(=O)CCCCCCCCCCCCCCC	0.00554713	1.10166
PC 18:1/16:0	WTJKGGKOPKCXLL-VYOBOKEXSA-N	5497103	CCCCCCCCCCCCCCCC(=O)OC[C@H](COP(=O)([O-])OCC[N+](C)(C)C)OC(=O)CCCCCCC/C=C\CCCCCCCC	0.0356513	0.950224
PC 28:0	CITHEXJVPOWHKC-UUWRZZSWSA-N	5459377	CCCCCCCCCCCCCC(=O)OC[C@H](COP(=O)([O-])OCC[N+](C)(C)C)OC(=O)CCCCCCCCCCCCC	0.0152256	1.34578
PC 30:0	RFVFQQWKPSOBED-PSXMRANNSA-N	129657	CCCCCCCCCCCCCCCC(=O)O[C@H](COC(=O)CCCCCCCCCCCCC)COP(=O)([O-])OCC[N+](C)(C)C	0.005253	1.25748
PC 32:1	QIBZFHLFHCIUOT-NPBIGWJUSA-N	6443788	CCCCCCCCCCCCCCCC(=O)OC[C@H](COP(=O)([O-])OCC[N+](C)(C)C)OC(=O)CCCCCCC/C=C\CCCCCC	0.461017	0.948107
PC 32:2	GPWHCUUIQMGELX-VHQDNGOZSA-N	24778764	CCCCCC/C=C\CCCCCCCC(=O)OC[C@H](COP(=O)([O-])OCC[N+](C)(C)C)OC(=O)CCCCCCC/C=C\CCCCCC	0.800209	1.01988
PC 32:3	UXEFXNOSLOCOLX-ZCHSEWAGSA-N	52922763	CCCCCCCCCCCCCC(=O)O[C@H](COC(=O)CCCC/C=C\C/C=C\C/C=C\CCCCC)COP(=O)([O-])OCC[N+](C)(C)C	0.00179701	1.27256
PC 33:1	GXTATYLPYLLNLV-MGIDVFSBSA-N	24778662	CCCCCCCCCCCCCCC(=O)OC[C@H](COP(=O)([O-])OCC[N+](C)(C)C)OC(=O)CCCCCCCCC/C=C\CCCCCC	0.51772	0.950593
PC 34:0	PZNPLUBHRSSFHT-RRHRGVEJSA-N	24778686	CCCCCCCCCCCCCCCCCC(=O)O[C@H](COC(=O)CCCCCCCCCCCCCCC)COP(=O)([O-])OCC[N+](C)(C)C	1.23711e-06	1.29686
PC 34:2	JLPULHDHAOZNQI-ZTIMHPMXSA-N	5287971	CCCCCCCCCCCCCCCC(=O)OC[C@H](COP(=O)([O-])OCC[N+](C)(C)C)OC(=O)CCCCCCC/C=C\C/C=C\CCCCC	0.90403	0.998327
PC 34:3	CNNSEHUKQJCGTE-UPPWDXJYSA-N	24778699	CCCCCCCCCCCCCCCC(=O)OC[C@H](COP(=O)([O-])OCC[N+](C)(C)C)OC(=O)CCCC/C=C\C/C=C\C/C=C\CCCCC	0.0054143	0.838673
PC 35:2	ZSKWZJYUVZYDQU-WESJWMGVSA-N	52922491	CCCCCCCCCCCCCCCCC(=O)OC[C@H](COP(=O)([O-])OCC[N+](C)(C)C)OC(=O)CCCCCCC/C=C\C/C=C\CCCCC	0.0752679	1.09265
PC 36:0	NRJAVPSFFCBXDT-HUESYALOSA-N	94190	CCCCCCCCCCCCCCCCCC(=O)OC[C@H](COP(=O)([O-])OCC[N+](C)(C)C)OC(=O)CCCCCCCCCCCCCCCCC	0.0287509	1.14285
PC 36:1	ATHVAWFAEPLPPQ-VRDBWYNSSA-N	24778825	CCCCCCCCCCCCCCCCCC(=O)OC[C@H](COP(=O)([O-])OCC[N+](C)(C)C)OC(=O)CCCCCCC/C=C\CCCCCCCC	0.453142	1.04094
PC 36:2	SNKAWJBJQDLSFF-NVKMUCNASA-N	10350317	CCCCCCCC/C=C\CCCCCCCC(=O)OC[C@H](COP(=O)([O-])OCC[N+](C)(C)C)OC(=O)CCCCCCC/C=C\CCCCCCCC	0.00060261	1.06011
PC 36:3	BXRLDROZWDUSGM-ZRYFCQOPSA-N	24778937	CCCCCCCC/C=C\CCCCCCCC(=O)OC[C@H](COP(=O)([O-])OCC[N+](C)(C)C)OC(=O)CCCC/C=C\C/C=C\CCCCCCCC	0.453791	1.02875
PC 36:4	IIZPXYDJLKNOIY-JXPKJXOSSA-N	10747814	CCCCCCCCCCCCCCCC(=O)OC[C@H](COP(=O)([O-])OCC[N+](C)(C)C)OC(=O)CCC/C=C\C/C=C\C/C=C\C/C=C\CCCCC	0.000820498	1.08472
PC 36:5	DYDDZDMJSQYFGN-OIVUZXIWSA-N	24778771	CCCCCC/C=C\CCCCCCCC(=O)OC[C@H](COP(=O)([O-])OCC[N+](C)(C)C)OC(=O)CCC/C=C\C/C=C\C/C=C\C/C=C\CCCCC	0.676473	1.00694
PC 36:6	SPWBDEZMKCRQSX-NGPPOSSDSA-N	52922847	CCCCC/C=C\C/C=C\C/C=C\CCCCC(=O)O[C@H](COC(=O)CCCCCCC/C=C\C/C=C\C/C=C\CC)COP(=O)([O-])OCC[N+](C)(C)C	0.785197	1.02791
PC 37:2	MCZUABDVGPPWPM-HJTCUGKVSA-N	52922735	CCCCCCCCCCCCCCCCCCC(=O)O[C@H](COC(=O)CCCCCCC/C=C\C/C=C\CCCCC)COP(=O)([O-])OCC[N+](C)(C)C	0.077009	1.09213
PC 37:3	OOYQEEUUQRMQKL-JUUDQZDJSA-N	52922851	CCCCCCCCCCCCCCCCCCC(=O)O[C@H](COC(=O)CCCCCCC/C=C\C/C=C\C/C=C\CC)COP(=O)([O-])OCC[N+](C)(C)C	0.162819	1.1273
PC 37:4	QRPUCJXFPYFTMB-FBFLODOBSA-N	52922853	CCCCCCCCC/C=C\CCCCCCCC(=O)O[C@H](COC(=O)CCCCCCC/C=C\C/C=C\C/C=C\CC)COP(=O)([O-])OCC[N+](C)(C)C	2.77868e-06	1.28661
PC 38:2	KXXLFCAPKGRXBT-FMJYHZMHSA-N	24779263	CCCCCCCCCCCCCCCCCCCC(=O)OC[C@H](COP(=O)([O-])OCC[N+](C)(C)C)OC(=O)CCCCCCC/C=C\C/C=C\CCCCC	0.000806751	1.16188
PC 38:3	OJHJKEBRZSDTTL-VHWCKNCUSA-N	52922741	CCCCCCCC/C=C\CCCCCCCCCC(=O)O[C@H](COC(=O)CCCCCCC/C=C\C/C=C\CCCCC)COP(=O)([O-])OCC[N+](C)(C)C	0.417097	1.08707
PC 38:4	DNYKSJQVBCVGOF-LCKGXUDJSA-N	52923291	CCCCCCCCCCCCCCCCCC(=O)O[C@H](COC(=O)CCC/C=C\C/C=C\C/C=C\C/C=C\CCCCC)COP(=O)([O-])OCC[N+](C)(C)C	3.07079e-06	1.17167
PC 38:5	YLWBKBDNHWQEFU-YJXJLLHLSA-N	53479033	CCCCCC/C=C\CCCCCCCCCC(=O)O[C@H](COC(=O)CCC/C=C\C/C=C\C/C=C\C/C=C\CCCCC)COP(=O)([O-])OCC[N+](C)(C)C	0.695493	0.958598
PC 38:6	PLZBTDKJYHXIEW-DZUXOTHRSA-N	52923295	CCCCC/C=C\C/C=C\CCCCCCCC(=O)O[C@H](COC(=O)CCC/C=C\C/C=C\C/C=C\C/C=C\CCCCC)COP(=O)([O-])OCC[N+](C)(C)C	0.0380616	1.11607
PC 38:8	QQNHCRBGLPDWEW-LRFGEVPTSA-N	52922865	CC/C=C\C/C=C\C/C=C\CCCCCCCC(=O)OC[C@H](COP(=O)([O-])OCC[N+](C)(C)C)OC(=O)CCC/C=C\C/C=C\C/C=C\C/C=C\C/C=C\CC	0.22813	0.839644
PC 40:2	AEUCYCQYAUFAKH-DITNKEBASA-N	24779063	CCCCCCCC/C=C\CCCCCCCCCC(=O)OC[C@H](COP(=O)([O-])OCC[N+](C)(C)C)OC(=O)CCCCCCCCC/C=C\CCCCCCCC	0.000576359	1.22621
PC 40:5	LJFKFKIYUJNFPZ-ZLFSCUDPSA-N	52923133	CCCCCCCC/C=C\CCCCCCCCCC(=O)OC[C@H](COP(=O)([O-])OCC[N+](C)(C)C)OC(=O)CCC/C=C\C/C=C\C/C=C\C/C=C\CCCCC	0.00853076	1.22561
PC 40:6	TYRTWVKQVGNGSZ-RGBTVBCDSA-N	52923195	CCCCC/C=C\C/C=C\CCCCCCCCCC(=O)OC[C@H](COP(=O)([O-])OCC[N+](C)(C)C)OC(=O)CCC/C=C\C/C=C\C/C=C\C/C=C\CCCCC	0.000146551	1.28206
PC 40:7	BPUROMFCPFGBOT-ZEGPSQTJSA-N	24778982	CCCCC/C=C\C/C=C\CCCCCCCC(=O)OC[C@H](COP(=O)([O-])OCC[N+](C)(C)C)OC(=O)CC/C=C\C/C=C\C/C=C\C/C=C\C/C=C\CCCCC	0.582256	0.964728
PC 42:1	PAHPUCKPYBHMBM-RURDTVAGSA-N	24778881	CCCCCCCCCCCCCCCCCC(=O)OC[C@H](COP(=O)([O-])OCC[N+](C)(C)C)OC(=O)CCCCCCCCCCCCC/C=C\CCCCCCCC	1.23302e-05	0.804014
PC 42:4	SGYNBRXEOXADHS-CIUHTZMDSA-N	24779052	CCCCCCCCCCCCCCCCCCCC(=O)OC[C@H](COP(=O)([O-])OCC[N+](C)(C)C)OC(=O)CCCCC/C=C\C/C=C\C/C=C\C/C=C\C/C=C\CC	0.346309	1.04663
PC 42:6	DSVRMAGYENFTLY-GDDYDVMSSA-N	52923651	CCCCC/C=C\C/C=C\CCCCCCCCCC(=O)O[C@H](COC(=O)CCCCC/C=C\C/C=C\C/C=C\C/C=C\CCCCC)COP(=O)([O-])OCC[N+](C)(C)C	0.198476	0.866062
PC 44:3	GZZUNXHFXFGEBB-MXZPZXETSA-N	52923541	CCCCCCCCCC/C=C\CCCCCCCCCC(=O)OC[C@H](COP(=O)([O-])OCC[N+](C)(C)C)OC(=O)CCCCCCCCCCC/C=C\C/C=C\CCCCC	0.370821	0.953177
PC 44:4	UIAAGLPOUUFIRG-ZUEQPGPOSA-N	52923481	CCCCCCCCCCCCCCCCCCCCCC(=O)OC[C@H](COP(=O)([O-])OCC[N+](C)(C)C)OC(=O)CCCCC/C=C\C/C=C\C/C=C\C/C=C\CCCCC	0.417097	1.03934
PC p34:1	OIICTMOQBYZCDA-IIKIFWEUSA-N	11125520	CCCCCCCCCCCCCCCC/C=C\OC[C@H](COP(=O)([O-])OCC[N+](C)(C)C)OC(=O)CCCCCCCCCCCCCCC	0.0533676	0.927781
PC p34:2	KMNVIRCHUMQGHD-RCINKDPXSA-N	52923934	CCCCCCCCCCCCCCCC/C=C\OC[C@H](COP(=O)([O-])OCC[N+](C)(C)C)OC(=O)CCCCCCC/C=C\CCCCCC	0.00321411	0.882673
PC p34:3	QLEHHUPUHJPURI-PWYDUFMYSA-N	24779386	CCCCCCCCCCCCCC/C=C\OC[C@H](COP(=O)([O-])OCC[N+](C)(C)C)OC(=O)CCCCCCC/C=C\C/C=C\CCCCC	3.51875e-07	0.761345
PC p36:3	SOUZQPFUXRVDGK-KCTKZSJBSA-N	53481701	CCCCCCCCCCCCCCCCOC[C@H](COP(=O)([O-])OCC[N+](C)(C)C)OC(=O)CCCCCC/C=C\C/C=C\C/C=C\C/C=C\CC	0.622977	0.980083
PC p36:4	IOYKZPNDXIIXLN-LOQSCQKMSA-N	24779388	CCCCCCCCCCCCCC/C=C\OC[C@H](COP(=O)([O-])OCC[N+](C)(C)C)OC(=O)CCC/C=C\C/C=C\C/C=C\C/C=C\CCCCC	0.557393	1.03192
PC p38:3	WOSDZWBQBJHAMR-NOQLVGMBSA-N	52925093	CCCCCCCCCCCCCCCC/C=C\OC[C@H](COP(=O)(O)OCCN)OC(=O)CCCCCCCCCCC/C=C\C/C=C\CCCCC	0.293972	1.07639
PC p38:4	BAKDTVUHENQVRW-IXXGCMLPSA-N	52925117	CCCCCCCCCCCCCCCCCC/C=C\OC[C@H](COP(=O)(O)OCCN)OC(=O)CCCCCC/C=C\C/C=C\C/C=C\CCCCC	0.582256	1.0237
PE 34:2	HBZNVZIRJWODIB-NHCUFCNUSA-N	46891780	CCCCCCCCCCCCCCCC(=O)OC[C@H](COP(=O)([O-])OCC[NH3+])OC(=O)CCCCCCC/C=C\C/C=C\CCCCC	0.204669	1.14949
PE 36:2	DXXUYBAISOHOLM-XRIXOMQFSA-N	52924894	CCCCCCCCCCCCCCCCCC(=O)O[C@H](COC(=O)CCCCCCC/C=C\C/C=C\CCCCC)COP(=O)(O)OCCN	0.729816	1.02908
PE 36:3	GKAFCSRKMWFPSJ-RJXNKANHSA-N	71728379	CCCCCCCC/C=C\CCCCCCCC(=O)OC[C@H](COP(=O)([O-])OCC[NH3+])OC(=O)CCCCCCC/C=C\C/C=C\CCCCC	0.982602	0.99934
PE 36:4	DUQDVNACTOXOJA-KTKXOIIHSA-N	52924875	CCCCCCCCCCCCCCCC(=O)O[C@H](COC(=O)CCC/C=C\C/C=C\C/C=C\C/C=C\CCCCC)COP(=O)(O)OCCN	0.0298095	1.17016
PE 38:2	CLPMAPXZURYSNH-CNBLIUODSA-N	9546825	CCCCCCCCCCCCCCCCCCCC(=O)OC[C@H](COP(=O)(O)OCCN)OC(=O)CCCCCCC/C=C\C/C=C\CCCCC	0.0130923	1.13697
PE 38:4	ANRKEHNWXKCXDB-BHFWLYLHSA-N	46891781	CCCCCCCCCCCCCCCCCC(=O)OC[C@H](COP(=O)([O-])OCC[NH3+])OC(=O)CCC/C=C\C/C=C\C/C=C\C/C=C\CCCCC	0.000831194	1.31124
PE 38:6	LFGBKOUQHCWBQI-BZGLIJSBSA-N	52924893	CCCCC/C=C\C/C=C\CCCCCCCC(=O)OC[C@H](COP(=O)(O)OCCN)OC(=O)CCC/C=C\C/C=C\C/C=C\C/C=C\CCCCC	0.0535395	1.1676
PE 40:6	FEABWDMFZNBFCT-KUVQHVNNSA-N	52924379	CCCCC/C=C\C/C=C\CCCCCCCC(=O)OC[C@H](COP(=O)(O)OCCN)OC(=O)CCCCC/C=C\C/C=C\C/C=C\C/C=C\CCCCC	0.0250387	1.12505
Phosphatidylglycerol 29:0	RYHJACYQTJIGMZ-JHOUSYSJSA-N	52926457	CCCCCCCCCCCCCCCC(=O)OC[C@H](COP(=O)(O)OC[C@H](CO)O)OC(=O)CCCCCCCCCCCC	0.90403	0.998178
Plasmenyl-PC 34:2	IQACMFWAGALEAQ-WESJWMGVSA-N	6443157	CCCCCCCCCCCCCCCCOC[C@H](COP(=O)([O-])OCC[N+](C)(C)C)OC(=O)CCCCCCC/C=C\C/C=C\CCCCC	1.47294e-06	0.736259
Plasmenyl-PC 36:6	JCIBOIAZHLGPOT-YAYDGDQKSA-N	70698851	CCCCCC/C=C\CCCCCCCC/C=C\O[C@H](COC(=O)CCCC/C=C\C/C=C\C/C=C\C/C=C\CC)COP(=O)([O-])OCC[N+](C)(C)C	6.18159e-06	0.803494
Plasmenyl-PC 38:5	FHHVIBPVBBRLOR-IYACIECVSA-N	24779390	CCCCCCCCCCCCCCCC/C=C\OC[C@H](COP(=O)([O-])OCC[N+](C)(C)C)OC(=O)CCC/C=C\C/C=C\C/C=C\C/C=C\CCCCC	0.0135231	1.15635
Plasmenyl-PE 36:3	XVXISDREVDGQPX-PISDLAQISA-N	52925079	CCCCCCCCCCCCCCCC/C=C\OC[C@H](COP(=O)(O)OCCN)OC(=O)CCCCCCC/C=C\C/C=C\CCCCC	0.145402	0.914884
Plasmenyl-PE 36:5	UUYSKERSKRMYME-MAIXUNBTSA-N	52925126	CCCCCCCCCCCCCC/C=C\OC[C@H](COP(=O)(O)OCCN)OC(=O)CCC/C=C\C/C=C\C/C=C\C/C=C\CCCCC	0.0535395	1.14685
Plasmenyl-PE 36:6	RLLOITCRNQRGJD-DFAKUSJGSA-N	52925061	CCCCCCCCCCCCCC/C=C\OC[C@H](COP(=O)(O)OCCN)OC(=O)CCC/C=C\C/C=C\C/C=C\C/C=C\C/C=C\CC	0.406449	0.882378
Plasmenyl-PE 38:5	URPXXNCTXCOATD-FXMFQVEGSA-N	86289532	CCCCCCCCCCCCCCCC/C=C\OC[C@H](COP(=O)([O-])OCC[NH3+])OC(=O)CCC/C=C\C/C=C\C/C=C\C/C=C\CCCCC	0.0535395	1.14212
Plasmenyl-PE 38:6	KCNBSSYOJRUKOM-JALPNNRCSA-N	52925089	CCCCCCCCCCCCCCCC/C=C\OC[C@H](COP(=O)(O)OCCN)OC(=O)CCC/C=C\C/C=C\C/C=C\C/C=C\C/C=C\CC	0.0125794	1.19191
Plasmenyl-PE 38:7	WVGALBKSWOUIEZ-XNHMFJFDSA-N	5283497	CCCCCCCCCCCCCC/C=C\OC[C@H](COP(=O)(O)OCCN)OC(=O)CC/C=C\C/C=C\C/C=C\C/C=C\C/C=C\C/C=C\CC	0.0751935	1.15503
Plasmenyl-PE 40:6	CVCZYWPCMUWTNS-IXKBFPPMSA-N	52925119	CCCCCCCCCCCCCCCCCC/C=C\OC[C@H](COP(=O)(O)OCCN)OC(=O)CCC/C=C\C/C=C\C/C=C\C/C=C\C/C=C\CC	0.31359	1.11682
Plasmenyl-PE 40:7	FIJFPUAJUDAZEY-MNDXXDKYSA-N	42607458	CCCCCCCCCCCCCCCC/C=C\OC[C@H](COP(=O)(O)OCCN)OC(=O)CC/C=C\C/C=C\C/C=C\C/C=C\C/C=C\C/C=C\CC	0.0248051	1.19518
PS 38:3	BQBTWCBZEKRLFP-BGFRNLFWSA-N	52925523	CCCCCCCCCCCCCCCCCCCC(=O)O[C@H](COC(=O)CCCCCCC/C=C\C/C=C\C/C=C\CC)COP(=O)(O)OC[C@@H](C(=O)O)N	0.0248051	0.958439
PS 38:4	SVOUGFFDROZBJI-DNALCEECSA-N	24779545	CCCCCCCCCCCCCCCCCC(=O)OC[C@H](COP(=O)(O)OC[C@@H](C(=O)O)N)OC(=O)CCC/C=C\C/C=C\C/C=C\C/C=C\CCCCC	0.808517	0.997481
PS 40:3	BTIQFPURPAGQHS-HOSNKBABSA-N	52925502	CCCCCCCCCCCCCCCCCCCCCC(=O)O[C@H](COC(=O)CCCC/C=C\C/C=C\C/C=C\CCCCC)COP(=O)(O)OC[C@@H](C(=O)O)N	0.556898	1.02787
PS 40:4	GBBNRADSWUALEU-AEDAHVLISA-N	52925748	CCCCCCCCCCCCCCCCCCCC(=O)O[C@H](COC(=O)CCC/C=C\C/C=C\C/C=C\C/C=C\CCCCC)COP(=O)(O)OC[C@@H](C(=O)O)N	0.00294092	1.04209
PS 40:6	LYYHRRPTEXPVOR-SYEOQEKUSA-N	24779546	CCCCCCCCCCCCCCCCCC(=O)OC[C@H](COP(=O)(O)OC[C@@H](C(=O)O)N)OC(=O)CC/C=C\C/C=C\C/C=C\C/C=C\C/C=C\C/C=C\CC	0.00320284	1.11468
PS 42:5	VNQACVFLMLYTLE-WDLXSBMRSA-N	52925755	CCCCCCCCCC/C=C\CCCCCCCCCC(=O)O[C@H](COC(=O)CCC/C=C\C/C=C\C/C=C\C/C=C\CCCCC)COP(=O)(O)OC[C@@H](C(=O)O)N	0.139372	1.07804
PS 42:6	WOBFEYJLJCLDBR-NISVGTQTSA-N	52925756	CCCCC/C=C\C/C=C\CCCCCCCCCCCC(=O)O[C@H](COC(=O)CCC/C=C\C/C=C\C/C=C\C/C=C\CCCCC)COP(=O)(O)OC[C@@H](C(=O)O)N	1.10764e-06	1.21493
PS 42:8	ROCNHMAZFKRILY-PRDJOCNNSA-N	52925757	CCCCC/C=C\C/C=C\C/C=C\C/C=C\CCCCCC(=O)O[C@H](COC(=O)CCC/C=C\C/C=C\C/C=C\C/C=C\CCCCC)COP(=O)(O)OC[C@@H](C(=O)O)N	0.0183673	1.17807
PS p34:0	OHPHIZCKAAJKOG-PBSRCHRYSA-N	52926194	CCCCCCCCCCCCCCCCCC(=O)O[C@H](CO/C=C\CCCCCCCCCCCCCC)COP(=O)(O)OC[C@@H](C(=O)O)N	0.808471	0.987405
SM 33:1	LQINJRUGTUOHGS-YPDYIYJKSA-N	52931139	CCCCCCCCCCCCCCC(=O)N[C@@H](COP(=O)([O-])OCC[N+](C)(C)C)[C@@H](/C=C/CCCCCCCCCCCCC)O	0.00881893	1.13806
SM 34:0	QHZIGNLCLJPLCU-QPPIDDCLSA-N	9939965	CCCCCCCCCCCCCCC[C@H]([C@H](COP(=O)([O-])OCC[N+](C)(C)C)NC(=O)CCCCCCCCCCCCCCC)O	0.644787	1.02778
SM d16:1/20:0	LKQLRGMMMAHREN-YJFXYUILSA-N	6453725	CCCCCCCCCCCCCCCCCC(=O)N[C@@H](COP(=O)([O-])OCC[N+](C)(C)C)[C@@H](/C=C/CCCCCCCCCCCCC)O	3.424e-05	1.19005
SM d16:1/20:1	NBEADXWAAWCCDG-QDDWGVBQSA-N	6443882	CCCCCCCCCCCCC/C=C/[C@H]([C@H](COP(=O)([O-])OCC[N+](C)(C)C)NC(=O)CCCCCCC/C=C\CCCCCCCC)O	0.00881893	1.10408
SM d18:1/14:0	KYICBZWZQPCUMO-PSALXKTOSA-N	11433862	CCCCCCCCCCCCC/C=C/[C@H]([C@H](COP(=O)([O-])OCC[N+](C)(C)C)NC(=O)CCCCCCCCCCCCC)O	4.79887e-05	1.26841
SM d18:1/16:0	RWKUXQNLWDTSLO-GWQJGLRPSA-N	9939941	CCCCCCCCCCCCCCCC(=O)N[C@@H](COP(=O)([O-])OCC[N+](C)(C)C)[C@@H](/C=C/CCCCCCCCCCCCC)O	0.106434	1.03646
SM d18:1/16:1	YLWSJLLZUHSIEA-CKSUKHGVSA-N	52931235	CCCCCCCCCCCCCCCC(=O)N[C@@H](COP(=O)([O-])OCC[N+](C)(C)C)[C@@H](/C=C/CCCCCCCC/C=C\CCC)O	0.0841023	1.05029
SM d18:1/20:0	AADLTHQNYQJHQV-SVLGDMRNSA-N	44260124	CCCCCCCCCCCCCCCCCCCC(=O)N[C@@H](COP(=O)([O-])OCC[N+](C)(C)C)[C@@H](/C=C/CCCCCCCCCCCCC)O	8.87044e-05	1.16812
SM (d18:1/20:1)	MDRFMTLYKHBJTF-NQYLGBTJSA-N	52931179	CCCCCCCCCCCCC/C=C/[C@H]([C@H](COP(=O)([O-])OCC[N+](C)(C)C)NC(=O)CCCCCCCCC/C=C\CCCCCCCC)O	0.107442	1.05587
SM d18:1/21:0	YXSZOBWVQJIWNE-QVDCKBILSA-N	52931193	CCCCCCCCCCCCCCCCCCCCC(=O)N[C@@H](COP(=O)([O-])OCC[N+](C)(C)C)[C@@H](/C=C/CCCCCCCCCCCCC)O	0.0462598	1.1206
SM d18:1/22:0	FJJANLYCZUNFSE-TWKUQIQBSA-N	44260125	CCCCCCCCCCCCCCCCCCCCCC(=O)N[C@@H](COP(=O)([O-])OCC[N+](C)(C)C)[C@@H](/C=C/CCCCCCCCCCCCC)O	0.555508	1.01901
SM d18:1/23:0	SXZWBNWTCVLZJN-NMIJJABPSA-N	46891684	CCCCCCCCCCCCCCCCCCCCCCC(=O)N[C@@H](COP(=O)([O-])OCC[N+](C)(C)C)[C@@H](/C=C/CCCCCCCCCCCCC)O	0.277222	0.950146
SM d18:1/24:0	QEDPUVGSSDPBMD-XTAIVQBESA-N	44260127	CCCCCCCCCCCCCCCCCCCCCCCC(=O)N[C@@H](COP(=O)([O-])OCC[N+](C)(C)C)[C@@H](/C=C/CCCCCCCCCCCCC)O	0.62046	0.982326
SM d18:2/23:0	JBDGKEXQKCCQFK-JWQIMADESA-N	52931209	CCCCCCCCCCCCCCCCCCCCCCC(=O)N[C@@H](COP(=O)([O-])OCC[N+](C)(C)C)[C@@H](/C=C/CCCCCCCC/C=C\CCC)O	0.218894	0.949569
SM d18:2/24:0	DACOGJMBYLZYDH-GXJPFUDISA-N	52931217	CCCCCCCCCCCCCCCCCCCCCCCC(=O)N[C@@H](COP(=O)([O-])OCC[N+](C)(C)C)[C@@H](/C=C/CCCCCCCC/C=C\CCC)O	0.10105	0.930055
SM (d18:2/24:1)	TXFLWJQVQCDUDZ-BRUGZULGSA-N	52931215	CCCCCCCC/C=C\CCCCCCCCCCCCCC(=O)N[C@@H](COP(=O)([O-])OCC[N+](C)(C)C)[C@@H](/C=C/CCCCCCCC/C=C\CCC)O	0.384679	0.968769
TG 42:0	DUXYWXYOBMKGIN-UHFFFAOYSA-N	11148	CCCCCCCCCCCCCC(=O)OCC(COC(=O)CCCCCCCCCCCCC)OC(=O)CCCCCCCCCCCCC	5.27331e-08	4.0854
TG 44:1	UZLGGKDLJGDGEY-WVSHCNQOSA-N	56936554	CCCCCCCCCCCCCC(=O)OC[C@H](COC(=O)CCCCCCC/C=C\CCCCCC)OC(=O)CCCCCCCCCCCCC	1.26683e-08	4.47822
TG 46:0	JWVXCFSNEOMSHH-YACUFSJGSA-N	91865745	CCCCCCCCCCCCCCCC(=O)OC[C@@H](COC(=O)CCCCCCCCCCCCC)OC(=O)CCCCCCCCCCCCCCC	2.27549e-07	2.5948
TG 46:1	RSDIQTNCDWUNDP-JHXSWNAYSA-N	56936558	CCCCCCCCCCCCCC(=O)OC[C@H](COC(=O)CCCCCCC/C=C\CCCCCCCC)OC(=O)CCCCCCCCCCCCC	1.92357e-08	3.42017
TG 46:2	XUEMVUXNOCIHLG-MOFPORNTSA-N	56936582	CCCCCCCCCCCCCC(=O)OC[C@H](COC(=O)CCCCCCC/C=C\CCCCCC)OC(=O)CCCCCCC/C=C\CCCCCC	1.25675e-09	3.81037
TG 46:3	AQARPXOEHQBBQN-OJJDTYCWSA-N	56936561	CCCCCCCCCCCCCC(=O)OC[C@H](COC(=O)CCCCCCC/C=C\C/C=C\C/C=C\CC)OC(=O)CCCCCCCCCCCCC	1.25675e-09	3.35968
TG 48:0	PVNIQBQSYATKKL-UHFFFAOYSA-N	11147	CCCCCCCCCCCCCCCC(=O)OCC(COC(=O)CCCCCCCCCCCCCCC)OC(=O)CCCCCCCCCCCCCCC	1.35989e-05	1.72409
TG 48:1	FEKLSEFRUGWUOS-DLOIZKPKSA-N	9543986	CCCCCCCCCCCCCCCC(=O)OC[C@H](COC(=O)CCCCCCC/C=C\CCCCCC)OC(=O)CCCCCCCCCCCCCCC	6.66709e-08	2.08152
TG 48:2	RUOVJPPUXXFZPC-YZEIBMOJSA-N	9543987	CCCCCCCCCCCCCCCC(=O)OC[C@H](COC(=O)CCCCCCC/C=C\CCCCCC)OC(=O)CCCCCCC/C=C\CCCCCC	1.26683e-08	2.57634
TG 48:3	SKGWNZXOCSYJQL-BUTYCLJRSA-N	9543989	CCCCCC/C=C\CCCCCCCC(=O)OCC(OC(=O)CCCCCCC/C=C\CCCCCC)COC(=O)CCCCCCC/C=C\CCCCCC	2.10635e-09	3.259
TG 49:0	TTWJTJMWHOYBPQ-ANFMRNGASA-N	9543988	CCCCCCCCCCCCCCCCC(=O)OC[C@@H](COC(=O)CCCCCCCCCCCCCCC)OC(=O)CCCCCCCCCCCCCCC	1.81818e-05	2.04383
TG 49:1	VYYGQDOPVVYUKW-UKFBYESTSA-N	9543991	CCCCCCCCCCCCCCCC(=O)OC[C@H](COC(=O)CCCCCCC/C=C\CCCCCCC)OC(=O)CCCCCCCCCCCCCCC	6.68809e-06	2.09669
TG 49:2	QZYSUBAQYSVFNX-PSMULLBHSA-N	9543993	CCCCCCCCCCCCCCCCC(=O)OC[C@@H](COC(=O)CCCCCCC/C=C\CCCCCC)OC(=O)CCCCCCC/C=C\CCCCCC	1.69182e-06	1.91335
TG 50:0	QRJMBNGGFSPTQP-BXJPYAOGSA-N	3246958	[2H]C([2H])(C([2H])(C([2H])([2H])OC(=O)CCCCCCCCCCCCCCC)OC(=O)CCCCCCCCCCCCCCCCC)OC(=O)CCCCCCCCCCCCCCC	3.8032e-07	2.49042
TG 50:1	YHMDGPZOSGBQRH-YYSBDVFPSA-N	25240460	CCCCCCCCCCCCCCCC(=O)OC[C@H](COC(=O)CCCCCCC/C=C\CCCCCCCC)OC(=O)CCCCCCCCCCCCCCC	8.02815e-07	1.38002
TG 50:2	QEZWFCZNHWUARW-XQCAQTCHSA-N	9544010	CCCCCCCCCCCCCCCCCC(=O)OC[C@@H](COC(=O)CCCCCCC/C=C\CCCCCC)OC(=O)CCCCCCC/C=C\CCCCCC	1.18515e-07	1.41285
TG 50:3	UFHNZOACKFBCOM-YXKNDSBASA-N	25240357	CCCCCCCC/C=C\CCCCCCCC(=O)OC[C@@H](COC(=O)CCCCCCC/C=C\CCCCCC)OC(=O)CCCCCCC/C=C\CCCCCC	1.25675e-09	1.94413
TG 50:4	PVMBAGXWHHZKFP-JMPJWMFJSA-N	25240359	CCCCCC/C=C\CCCCCCCC(=O)OC[C@H](COC(=O)CCCCCCC/C=C\C/C=C\CCCCC)OC(=O)CCCCCCC/C=C\CCCCCC	1.25675e-09	2.26195
TG 50:5	AFTBPUXZTDLRSP-UDQIKIEDSA-N	9544045	CCCCCC/C=C\CCCCCCCC(=O)OC[C@H](COC(=O)CCCCCCC/C=C\C/C=C\C/C=C\CC)OC(=O)CCCCCCC/C=C\CCCCCC	1.4691e-07	2.12065
TG 51:1	OZAXLAGNPZMZAD-BOEMPQCLSA-N	9544006	CCCCCCCCCCCCCCCCC(=O)OC[C@H](COC(=O)CCCCCCC/C=C\CCCCCCC)OC(=O)CCCCCCCCCCCCCCCC	1.35323e-06	2.20325
TG 51:2	NSNSZGBCOIKUBU-SZOKBDNISA-N	9544013	CCCCCCCCCCCCCCCCC(=O)OC[C@H](COC(=O)CCCCCCC/C=C\CCCCCCC)OC(=O)CCCCCCC/C=C\CCCCCCC	2.00072e-05	1.68837
TG 51:3	ISSGPXMQOMAFMJ-DMGKHJLRSA-N	9544023	CCCCCCC/C=C\CCCCCCCC(=O)OCC(OC(=O)CCCCCCC/C=C\CCCCCCC)COC(=O)CCCCCCC/C=C\CCCCCCC	1.45972e-07	1.67563
TG 51:4	IIRQXNVLAXQEKB-KBEZCZBDSA-N	9544052	CCCCCCCC/C=C\CCCCCCCC(=O)OC[C@@H](COC(=O)CCCCCCC/C=C\CCCCCC)OC(=O)CCCCCCC/C=C\C/C=C\CCCC	1.28612e-08	1.8622
TG 52:0	SDNYRTVJOFMYIW-OIVUAWODSA-N	545690	CCCCCCCCCCCCCCCCCC(=O)OC[C@@H](COC(=O)CCCCCCCCCCCCCCC)OC(=O)CCCCCCCCCCCCCCCCC	5.27331e-08	2.96169
TG 52:1	NPCZZYKITFKRQZ-FQUZZJBASA-N	25240360	CCCCCCCCCCCCCCCCCC(=O)O[C@H](COC(=O)CCCCCCCCCCCCCCC)COC(=O)CCCCCCC/C=C\CCCCCCCC	1.26683e-08	2.34282
TG 52:2	KGLAHZTWGPHKFF-RISKEULASA-N	25240361	CCCCCCCCCCCCCCCC(=O)OC[C@H](COC(=O)CCCCCCC/C=C\C/C=C\CCCCC)OC(=O)CCCCCCC/C=C\CCCCCCCC	0.0017976	1.10221
TG 52:4	WHSWXEYWNPTUPW-HNJDVRDNSA-N	25240364	CCCCCCCC/C=C\CCCCCCCC(=O)O[C@H](COC(=O)CCCCCCC/C=C\CCCCCC)COC(=O)CCCCCCC/C=C\C/C=C\CCCCC	1.23711e-06	1.40384
TG 52:5	CQZAAIKPSLHIBC-KDJOUNIJSA-N	25240366	CCCCCC/C=C\CCCCCCCC(=O)OC[C@H](COC(=O)CCCCCCC/C=C\C/C=C\CCCCC)OC(=O)CCCCCCC/C=C\C/C=C\CCCCC	0.00229666	1.44611
TG 53:0	ZJUXHXMIKPSINE-IONAWPRUSA-N	9544181	CCCCCCCCCCCCCCCCCCCCC(=O)OC[C@@H](COC(=O)CCCCCCCCCCCCCCC)OC(=O)CCCCCCCCCCCCCCC	1.96342e-06	1.87619
TG 53:1	WWJIBIGWKGFVAQ-JNSYTQKUSA-N	9544081	CCCCCCCCCCCCCCCCCC(=O)OC[C@@H](COC(=O)CCCCCCC/C=C\CCCCCCC)OC(=O)CCCCCCCCCCCCCCCCC	4.35661e-07	2.57417
TG 53:2	RSINITWKVQRWSZ-RFVLVDBCSA-N	9544102	CCCCCCCCCCCCCCCCCC(=O)OC[C@@H](COC(=O)CCCCCCC/C=C\C/C=C\CCCC)OC(=O)CCCCCCCCCCCCCCCCC	0.000100231	1.63356
TG 53:3	ZNQBEJJYVJSZLM-LEDQTTRKSA-N	9544126	CCCCCCCC/C=C\CCCCCCCC(=O)OC[C@@H](COC(=O)CCCCCCC/C=C\CCCCCCC)OC(=O)CCCCCCC/C=C\CCCCCCCC	3.87687e-07	1.67499
TG 53:4	BMSDHYZLQWTKSQ-LSJAAEOESA-N	9544152	CCCCCCCC/C=C\CCCCCCCC(=O)OC[C@@H](COC(=O)CCCCCCC/C=C\C/C=C\CCCC)OC(=O)CCCCCCC/C=C\CCCCCCCC	2.75911e-07	1.55498
TG 53:5	QHYAATSKYBYSLG-BXDFBOBBSA-N	9544183	CCCCCCC/C=C\CCCCCCCC(=O)OC[C@H](COC(=O)CCCCCCC/C=C\C/C=C\CCCCC)OC(=O)CCCCCCC/C=C\C/C=C\CCCCC	7.31383e-07	1.84348
TG 54:0	DCXXMTOCNZCJGO-UHFFFAOYSA-N	11146	CCCCCCCCCCCCCCCCCC(=O)OCC(COC(=O)CCCCCCCCCCCCCCCCC)OC(=O)CCCCCCCCCCCCCCCCC	4.02639e-05	1.7061
TG 54:1	YFFIQXNTTVSKJC-NZEOUKRFSA-N	16058371	CCCCCCCCCCCCCCCCCC(=O)OC[C@H](COC(=O)CCCCCCC/C=C\CCCCCCCC)OC(=O)CCCCCCCCCCCCCCCCC	2.43306e-08	2.78208
TG 54:2	RYNHWWNZNIGDAQ-BMTCQUSZSA-N	16058372	CCCCCCCCCCCCCCCCCC(=O)OC[C@H](COC(=O)CCCCCCC/C=C\CCCCCCCC)OC(=O)CCCCCCC/C=C\CCCCCCCC	4.47761e-08	1.94815
TG 54:3	PHYFQTYBJUILEZ-IUPFWZBJSA-N	5497163	CCCCCCCC/C=C\CCCCCCCC(=O)OCC(OC(=O)CCCCCCC/C=C\CCCCCCCC)COC(=O)CCCCCCC/C=C\CCCCCCCC	6.18159e-06	1.32528
TG 54:4	BRLGHZXETDWABO-NOFIOOQLSA-N	9544255	CCCCCCCCCCCCCCCCCC(=O)OC[C@H](COC(=O)CCCCCCC/C=C\C/C=C\C/C=C\CC)OC(=O)CCCCCCC/C=C\CCCCCCCC	0.00229666	1.28579
TG 54:5	VVEBTVMJPTZDHO-YQFZQLSNSA-N	25240373	CCCCCCCC/C=C\CCCCCCCC(=O)OC[C@H](COC(=O)CCCCCCC/C=C\C/C=C\CCCCC)OC(=O)CCCCCCC/C=C\C/C=C\CCCCC	4.02639e-05	1.42176
TG 54:6	HBOQXIRUPVQLKX-BBWANDEASA-N	5322095	CCCCC/C=C\C/C=C\CCCCCCCC(=O)OCC(OC(=O)CCCCCCC/C=C\C/C=C\CCCCC)COC(=O)CCCCCCC/C=C\C/C=C\CCCCC	0.00107196	1.6118
TG 54:8	BMPVTDWOWBNPJU-NYRSPQLFSA-N	9544413	CCCCC/C=C\C/C=C\C/C=C\C/C=C\CCCC(=O)OC[C@@H](COC(=O)CCCCCCC/C=C\C/C=C\CCCC)OC(=O)CCCCCCC/C=C\C/C=C\CCCC	0.0244861	1.42419
TG 56:1	OCYFAHIHWCVZKS-FHSLLVMSSA-N	9544345	CCCCCCCCCCCCCCCCCCCC(=O)OC[C@@H](COC(=O)CCCCCCCCCCCCCCCCC)OC(=O)CCCCCCC/C=C\CCCCCCCC	3.26276e-06	2.09593
TG 56:2	PDEQUPGHMOMBFC-FYEHETCMSA-N	9544390	CCCCCCCCCCCCCCCCCCCC(=O)OC[C@@H](COC(=O)CCCCCCCCCCCCCCCCC)OC(=O)CCCCCCC/C=C\C/C=C\CCCCC	2.77868e-06	2.11417
TG 56:3	QXMHHXQBBKDSSL-BAQZNRHJSA-N	9544447	CCCCCCCC/C=C\CCCCCCCCCC(=O)OC[C@@H](COC(=O)CCCCCCC/C=C\CCCCCCCC)OC(=O)CCCCCCC/C=C\CCCCCCCC	4.00472e-05	1.73372
TG 56:4	YONCDTJKIZDSKQ-IYASBODOSA-N	25240379	CCCCCCCC/C=C\CCCCCCCCCC(=O)OC[C@@H](COC(=O)CCCCCCC/C=C\CCCCCCCC)OC(=O)CCCCCCC/C=C\C/C=C\CCCCC	0.0116495	1.33534
TG 56:5	UHEJWASONFIROS-YPSHDQQVSA-N	25240380	CCCCCCCC/C=C\CCCCCCCCCC(=O)OC[C@@H](COC(=O)CCCCCCC/C=C\C/C=C\CCCCC)OC(=O)CCCCCCC/C=C\C/C=C\CCCCC	2.31858e-05	1.53088
TG 56:6	ZTNDRFCABXFVMY-WJTCTALZSA-N	9544625	CCCCC/C=C\C/C=C\CCCCCCCCCC(=O)OC[C@@H](COC(=O)CCCCCCC/C=C\C/C=C\CCCCC)OC(=O)CCCCCCC/C=C\C/C=C\CCCCC	0.90403	1.01298
TG 56:7	DODZUDCYRVWEOJ-GKZBLMSTSA-N	9544695	CCCCC/C=C\C/C=C\CCCCCCCC(=O)OC[C@H](COC(=O)CCCCCC/C=C\C/C=C\C/C=C\CCCCC)OC(=O)CCCCCCC/C=C\C/C=C\CCCCC	7.37086e-07	1.55475
TG 56:8	UBGUHMDKBGQUND-VPFWBQFRSA-N	9544762	CCCCCCCCCCCCCCCC(=O)OC[C@H](COC(=O)CCC/C=C\C/C=C\C/C=C\C/C=C\CCCCC)OC(=O)CCC/C=C\C/C=C\C/C=C\C/C=C\CCCCC	1.94607e-07	1.99426
TG 58:1	OWZMHFAFGQCCNI-FBXRAONGSA-N	25240381	CCCCCCCCCCCCCCCCCCCC(=O)OC[C@@H](COC(=O)CCCCCCC/C=C\CCCCCCCC)OC(=O)CCCCCCCCCCCCCCCCCCC	0.000421495	1.61906
TG 58:2	GXWBCAVCOMAOHT-VMCJOIRWSA-N	9545277	CCCCC/C=C\C/C=C\CCCCCCCC(=O)OC[C@H](COC(=O)CCC/C=C\C/C=C\C/C=C\C/C=C\CCCCC)OC(=O)CCC/C=C\C/C=C\C/C=C\C/C=C\CCCCC	4.43431e-05	1.72757
TG 58:3	RFMSTHTUAZETPD-JJPHLYBUSA-N	9544748	CCCCCCCC/C=C\CCCCCCCCCC(=O)OC[C@@H](COC(=O)CCCCCCC/C=C\CCCCCCCC)OC(=O)CCCCCCCCC/C=C\CCCCCCCC	1.98991e-05	1.94472
TG 58:4	CCKRHDUCFMOBKX-AAINFQTBSA-N	9544835	CCCCCCCCCCCCCCCCCCCC(=O)O[C@H](COC(=O)CCCCCCCCCCCCCCCCC)COC(=O)CCC/C=C\C/C=C\C/C=C\C/C=C\CCCCC	3.11648e-05	1.79265
TG 58:6	GSNFRUMSEHHPSY-LCXCSEBNSA-N	9544977	CCCCCCCC/C=C\CCCCCCCCCC(=O)O[C@H](COC(=O)CCCCCCC/C=C\CCCCCCCC)COC(=O)CCC/C=C\C/C=C\C/C=C\C/C=C\CCCCC	1.10764e-06	1.7625
TG 58:8	KWIGMCRWEINBIR-HUPVKWKYSA-N	9545124	CCCCCCCCCCCCCCCCCC(=O)OC[C@H](COC(=O)CCC/C=C\C/C=C\C/C=C\C/C=C\CCCCC)OC(=O)CCC/C=C\C/C=C\C/C=C\C/C=C\CCCCC	5.86952e-05	1.54706
TG 58:9	RVXFSLZMZOFGEQ-SWIIBWKZSA-N	9545200	CCCCCCCC/C=C\CCCCCCCC(=O)OC[C@H](COC(=O)CCC/C=C\C/C=C\C/C=C\C/C=C\CCCCC)OC(=O)CCC/C=C\C/C=C\C/C=C\C/C=C\CCCCC	1.23711e-06	1.72426
TG 60:1	YNDXXWKSWMKVGO-HZLQDPIMSA-N	9544965	CCCCCCCCCCCCCCCCCCCC(=O)OC[C@H](COC(=O)CCCCCCCCC/C=C\CCCCCCCC)OC(=O)CCCCCCCCCCCCCCCCCCC	0.00245193	1.45737
TG 60:11	ASSZWZBQIXMMKM-SYTPEAHJSA-N	9545730	CCCCC/C=C\C/C=C\C/C=C\CCCCCCC(=O)OC[C@H](COC(=O)CCC/C=C\C/C=C\C/C=C\C/C=C\CCCCC)OC(=O)CCC/C=C\C/C=C\C/C=C\C/C=C\CCCCC	0.000223683	1.52538
TG 60:2	QPNVLDQSHXVPMG-JMYPUKFOSA-N	9545040	CCCCCCCCCCCCCCCCCCCC(=O)OC[C@H](COC(=O)CCCCCCCCC/C=C\CCCCCCCC)OC(=O)CCCCCCCCC/C=C\CCCCCCCC	0.0118333	1.42147
TG 62:1	TZLOSVAFXBPUQT-VBMMIZSXSA-N	9545526	CCCCCCCCCCCCCCCCCCCCCC(=O)OC[C@H](COC(=O)CCCCCCCCCCCCCCCCCCC)OC(=O)CCCCCCCCC/C=C\CCCCCCCC	0.0675874	1.21991

## Sheet: Table S3
S3. Lipidome differential abundance analysis: Cluster II vs I at Visit -3
Compound Name	InChiKeys	Pubchem ID	SMILES	pvalue	foldchange
CE 18:1	RJECHNNFRHZQKU-RMUVNZEASA-N	5283632	CCCCCCCC/C=C\CCCCCCCC(=O)O[C@H]1CC[C@@]2([C@H]3CC[C@]4([C@H]([C@@H]3CC=C2C1)CC[C@@H]4[C@H](C)CCCC(C)C)C)C	0.0167638	0.879489
CE 18:2	NAACPBBQTFFYQB-LJAITQKLSA-N	5287939	CCCCC/C=C\C/C=C\CCCCCCCC(=O)O[C@H]1CC[C@@]2([C@H]3CC[C@]4([C@H]([C@@H]3CC=C2C1)CC[C@@H]4[C@H](C)CCCC(C)C)C)C	0.0284455	1.12966
CE 18:3	FYMCIBHUFSIWCE-WVXFKAQASA-N	6436907	CC/C=C\C/C=C\C/C=C\CCCCCCCC(=O)O[C@H]1CC[C@@]2([C@H]3CC[C@]4([C@H]([C@@H]3CC=C2C1)CC[C@@H]4[C@H](C)CCCC(C)C)C)C	7.12296e-09	0.669618
CE 20:4	IMXSFYNMSOULQS-BEDFLICRSA-N	6479222	CCCCC/C=C\C/C=C\C/C=C\C/C=C\CCCC(=O)O[C@H]1CC[C@@]2([C@H]3CC[C@]4([C@H]([C@@H]3CC=C2C1)CC[C@@H]4[C@H](C)CCCC(C)C)C)C	7.54053e-05	0.782046
CE 22:6	VOEVEGPMRIYYKC-HNJOWPRISA-N	14274978	CC/C=C\C/C=C\C/C=C\C/C=C\C/C=C\C/C=C\CCC(=O)O[C@H]1CC[C@@]2([C@H]3CC[C@]4([C@H]([C@@H]3CC=C2C1)CC[C@@H]4[C@H](C)CCCC(C)C)C)C	0.827243	0.973267
Ceramide d18:1/23:0	NAJHAHQNQCNWOP-PUYNVXOJSA-N	52931115	CCCCCCCCCCCCCCCCCCCCCCC(=O)N[C@@H](CO)[C@@H](/C=C/CCCCCCCCCCCCC)O	8.63783e-06	0.783512
Ceramide d40:1	KEPQASGDXIEOIL-GLQCRSEXSA-N	5283567	CCCCCCCCCCCCCCCCCCCCCC(=O)N[C@@H](CO)[C@@H](/C=C/CCCCCCCCCCCCC)O	0.000232863	0.832545
Ceramide d42:1	ZJVVOYPTFQEGPH-AUTSUKAISA-N	5283571	CCCCCCCCCCCCCCCCCCCCCCCC(=O)N[C@@H](CO)[C@@H](/C=C/CCCCCCCCCCCCC)O	0.339109	0.954667
Ceramide d42:2	VJSBNBBOSZJDKB-KPEYJIHVSA-N	5283568	CCCCCCCCCCCCC/C=C/[C@H]([C@H](CO)NC(=O)CCCCCCCCCCCCC/C=C\CCCCCCCC)O	6.60381e-05	0.754069
Cer (d18:1/16:0)	YDNKGFDKKRUKPY-TURZORIXSA-N	5283564	CCCCCCCCCCCCCCCC(=O)N[C@@H](CO)[C@@H](/C=C/CCCCCCCCCCCCC)O	0.000656471	0.850138
Cholesterol	HVYWMOMLDIMFJA-DPAQBDIFSA-N	5997	C[C@H](CCCC(C)C)[C@H]1CC[C@@H]2[C@@]1(CC[C@H]3[C@H]2CC=C4[C@@]3(CC[C@@H](C4)O)C)C	0.0932163	1.01735
DG 32:0	JEJLGIQLPYYGEE-XIFFEERXSA-N	644078	CCCCCCCCCCCCCCCC(=O)OC[C@H](CO)OC(=O)CCCCCCCCCCCCCCC	0.00100572	0.780218
DG 34:0	VYQDALBEQRZDPL-DHUJRADRSA-N	3246945	CCCCCCCCCCCCCCCCCC(=O)OC[C@H](CO)OC(=O)CCCCCCCCCCCCCCC	0.252787	0.942376
DG 34:1	YEJYLHKQOBOSCP-OZKTZCCCSA-N	5282283	CCCCCCCCCCCCCCCC(=O)OC[C@H](CO)OC(=O)CCCCCCC/C=C\CCCCCCCC	0.134347	0.852051
DG 36:0	UHUSDOQQWJGJQS-UHFFFAOYSA-N	102615	CCCCCCCCCCCCCCCCCC(=O)OCC(CO)OC(=O)CCCCCCCCCCCCCCCCC	0.459945	1.02931
DG 36:2	AFSHUZFNMVJNKX-LLWMBOQKSA-N	9543716	CCCCCCCC/C=C\CCCCCCCC(=O)OC[C@H](CO)OC(=O)CCCCCCC/C=C\CCCCCCCC	0.180117	0.872144
DG 36:3	BLZVZPYMHLXLHG-JOBMVARSSA-N	9543722	CCCCCCCC/C=C\CCCCCCCC(=O)OC[C@H](CO)OC(=O)CCCCCCC/C=C\C/C=C\CCCCC	0.218082	1.12008
DG 38:5	GRGDLDNREYVILP-CNWVQWJYSA-N	9543784	CCCCC/C=C\C/C=C\CCCCCCCCCC(=O)O[C@@H](CO)COC(=O)CCCCCCC/C=C\C/C=C\C/C=C\CC	0.29057	0.80272
DG 38:6	YDVDXUYJFQLPEG-CTHJWPIASA-N	9543795	CCCCC/C=C\C/C=C\C/C=C\CCCCCCC(=O)O[C@@H](CO)COC(=O)CCCCCCC/C=C\C/C=C\C/C=C\CC	0.973673	1.00905
DG 40:1	VFUWCRMMTRWZAT-JLDYGAOKSA-N	9543793	CCCCCCCCCCCCCCCCCCCC(=O)OC[C@H](CO)OC(=O)CCCCCCCCC/C=C\CCCCCCCC	0.987543	0.99885
FA 16:0	IPCSVZSSVZVIGE-UHFFFAOYSA-N	985	CCCCCCCCCCCCCCCC(=O)O	0.922319	0.992517
FA 16:1	SECPZKHBENQXJG-FPLPWBNLSA-N	445638	CCCCCC/C=C\CCCCCCCC(=O)O	0.946849	1.02174
FA 18:0	QIQXTHQIDYTFRH-UHFFFAOYSA-N	5281	CCCCCCCCCCCCCCCCCC(=O)O	0.841441	1.0207
FA 18:1	ZQPPMHVWECSIRJ-KTKRTIGZSA-N	445639	CCCCCCCC/C=C\CCCCCCCC(=O)O	0.856769	1.03321
FA 22:4	TWSWSIQAPQLDBP-DOFZRALJSA-N	5497181	CCCCC/C=C\C/C=C\C/C=C\C/C=C\CCCCCC(=O)O	0.100705	1.1241
GlcCer d18:1/22:0	YIGARKIIFOHVPF-YAEABVQUSA-N	6321359	CCCCCCCCCCCCCCCCCCCCCC(=O)N[C@@H](CO[C@H]1C(C([C@@H]([C@H](O1)CO)O)O)O)[C@@H](/C=C/CCCCCCCCCCCCC)O	0.0155334	0.88006
GlcCer d18:1/24:0	POQRWMRXUOPCLD-AAAFHMTMSA-N	6321361	CCCCCCCCCCCCCCCCCCCCCCCC(=O)N[C@@H](CO[C@H]1C(C([C@@H]([C@H](O1)CO)O)O)O)[C@@H](/C=C/CCCCCCCCCCCCC)O	0.0377187	0.893995
GlcCer d18:1/24:1	WBOZIXHPUPAOIA-RBELZSLISA-N	6321360	CCCCCCCCCCCCC/C=C/[C@H]([C@H](CO[C@H]1C(C([C@@H]([C@H](O1)CO)O)O)O)NC(=O)CCCCCCCCCCCCC/C=C\CCCCCCCC)O	0.000319553	0.791742
LPC 18:0	IHNKQIMGVNPMTC-RUZDIDTESA-N	497299	CCCCCCCCCCCCCCCCCC(=O)OC[C@H](COP(=O)([O-])OCC[N+](C)(C)C)O	0.708438	0.969833
LPC 18:1	YAMUFBLWGFFICM-PTGWMXDISA-N	16081932	CCCCCCCC/C=C\CCCCCCCC(=O)OC[C@H](COP(=O)([O-])OCC[N+](C)(C)C)O	0.134347	0.905012
LPC 18:2	SPJFYYJXNPEZDW-FTJOPAKQSA-N	11005824	CCCCC/C=C\C/C=C\CCCCCCCC(=O)OC[C@H](COP(=O)([O-])OCC[N+](C)(C)C)O	0.578314	0.951046
LPC 20:0	UATOAILWGVYRQS-HHHXNRCGSA-N	24779473	CCCCCCCCCCCCCCCCCCCC(=O)OC[C@H](COP(=O)([O-])OCC[N+](C)(C)C)O	0.16081	1.10061
LPC 20:1	GJTDRNFWIDPARY-GTPZACKGSA-N	24779475	CCCCCCCCCC/C=C\CCCCCCCC(=O)OC[C@H](COP(=O)([O-])OCC[N+](C)(C)C)O	0.51764	1.06382
LPC 20:2	YYQVCMMXPIJVHY-ZOIJLGJPSA-N	52924053	CCCCC/C=C\C/C=C\CCCCCCCCCC(=O)OC[C@H](COP(=O)([O-])OCC[N+](C)(C)C)O	0.346061	1.07298
LPE 18:0	BBYWOYAFBUOUFP-JOCHJYFZSA-N	46891690	CCCCCCCCCCCCCCCCCC(=O)OC[C@H](COP(=O)([O-])OCC[NH3+])O	0.0373457	0.739125
LPE 18:2	DBHKHNGBVGWQJE-USWSLJGRSA-N	52925130	CCCCC/C=C\C/C=C\CCCCCCCC(=O)OC[C@H](COP(=O)(O)OCCN)O	0.175005	0.877558
LPE 20:0	HEQMDGOBDIGJOC-XMMPIXPASA-N	52925131	CCCCCCCCCCCCCCCCCCCC(=O)OC[C@H](COP(=O)(O)OCCN)O	0.628056	0.991525
LPE 20:1	JEAGLCKGAKACCE-OPSAWKISSA-N	52925139	CCCCCCCC/C=C\CCCCCCCCCC(=O)OC[C@H](COP(=O)(O)OCCN)O	0.506626	0.947488
PC 16:0/16:0	KILNVBDSWZSGLL-KXQOOQHDSA-N	452110	CCCCCCCCCCCCCCCC(=O)OC[C@H](COP(=O)([O-])OCC[N+](C)(C)C)OC(=O)CCCCCCCCCCCCCCC	3.25981e-09	0.800338
PC 18:1/16:0	WTJKGGKOPKCXLL-VYOBOKEXSA-N	5497103	CCCCCCCCCCCCCCCC(=O)OC[C@H](COP(=O)([O-])OCC[N+](C)(C)C)OC(=O)CCCCCCC/C=C\CCCCCCCC	5.54148e-06	0.872222
PC 28:0	CITHEXJVPOWHKC-UUWRZZSWSA-N	5459377	CCCCCCCCCCCCCC(=O)OC[C@H](COP(=O)([O-])OCC[N+](C)(C)C)OC(=O)CCCCCCCCCCCCC	2.18364e-08	0.410256
PC 30:0	RFVFQQWKPSOBED-PSXMRANNSA-N	129657	CCCCCCCCCCCCCCCC(=O)O[C@H](COC(=O)CCCCCCCCCCCCC)COP(=O)([O-])OCC[N+](C)(C)C	1.11614e-11	0.497244
PC 32:1	QIBZFHLFHCIUOT-NPBIGWJUSA-N	6443788	CCCCCCCCCCCCCCCC(=O)OC[C@H](COP(=O)([O-])OCC[N+](C)(C)C)OC(=O)CCCCCCC/C=C\CCCCCC	9.95138e-10	0.589645
PC 32:2	GPWHCUUIQMGELX-VHQDNGOZSA-N	24778764	CCCCCC/C=C\CCCCCCCC(=O)OC[C@H](COP(=O)([O-])OCC[N+](C)(C)C)OC(=O)CCCCCCC/C=C\CCCCCC	5.56678e-07	0.671623
PC 32:3	UXEFXNOSLOCOLX-ZCHSEWAGSA-N	52922763	CCCCCCCCCCCCCC(=O)O[C@H](COC(=O)CCCC/C=C\C/C=C\C/C=C\CCCCC)COP(=O)([O-])OCC[N+](C)(C)C	2.2586e-10	0.530681
PC 33:1	GXTATYLPYLLNLV-MGIDVFSBSA-N	24778662	CCCCCCCCCCCCCCC(=O)OC[C@H](COP(=O)([O-])OCC[N+](C)(C)C)OC(=O)CCCCCCCCC/C=C\CCCCCC	1.6738e-12	0.549168
PC 34:0	PZNPLUBHRSSFHT-RRHRGVEJSA-N	24778686	CCCCCCCCCCCCCCCCCC(=O)O[C@H](COC(=O)CCCCCCCCCCCCCCC)COP(=O)([O-])OCC[N+](C)(C)C	2.6733e-09	0.729062
PC 34:2	JLPULHDHAOZNQI-ZTIMHPMXSA-N	5287971	CCCCCCCCCCCCCCCC(=O)OC[C@H](COP(=O)([O-])OCC[N+](C)(C)C)OC(=O)CCCCCCC/C=C\C/C=C\CCCCC	0.0119192	0.960998
PC 34:3	CNNSEHUKQJCGTE-UPPWDXJYSA-N	24778699	CCCCCCCCCCCCCCCC(=O)OC[C@H](COP(=O)([O-])OCC[N+](C)(C)C)OC(=O)CCCC/C=C\C/C=C\C/C=C\CCCCC	1.17447e-07	0.716099
PC 35:2	ZSKWZJYUVZYDQU-WESJWMGVSA-N	52922491	CCCCCCCCCCCCCCCCC(=O)OC[C@H](COP(=O)([O-])OCC[N+](C)(C)C)OC(=O)CCCCCCC/C=C\C/C=C\CCCCC	8.44857e-09	0.712487
PC 36:0	NRJAVPSFFCBXDT-HUESYALOSA-N	94190	CCCCCCCCCCCCCCCCCC(=O)OC[C@H](COP(=O)([O-])OCC[N+](C)(C)C)OC(=O)CCCCCCCCCCCCCCCCC	5.56678e-07	0.767793
PC 36:1	ATHVAWFAEPLPPQ-VRDBWYNSSA-N	24778825	CCCCCCCCCCCCCCCCCC(=O)OC[C@H](COP(=O)([O-])OCC[N+](C)(C)C)OC(=O)CCCCCCC/C=C\CCCCCCCC	2.2586e-10	0.726244
PC 36:2	SNKAWJBJQDLSFF-NVKMUCNASA-N	10350317	CCCCCCCC/C=C\CCCCCCCC(=O)OC[C@H](COP(=O)([O-])OCC[N+](C)(C)C)OC(=O)CCCCCCC/C=C\CCCCCCCC	0.0111435	0.829745
PC 36:3	BXRLDROZWDUSGM-ZRYFCQOPSA-N	24778937	CCCCCCCC/C=C\CCCCCCCC(=O)OC[C@H](COP(=O)([O-])OCC[N+](C)(C)C)OC(=O)CCCC/C=C\C/C=C\CCCCCCCC	0.00070228	0.826459
PC 36:4	IIZPXYDJLKNOIY-JXPKJXOSSA-N	10747814	CCCCCCCCCCCCCCCC(=O)OC[C@H](COP(=O)([O-])OCC[N+](C)(C)C)OC(=O)CCC/C=C\C/C=C\C/C=C\C/C=C\CCCCC	0.000164645	0.870143
PC 36:5	DYDDZDMJSQYFGN-OIVUZXIWSA-N	24778771	CCCCCC/C=C\CCCCCCCC(=O)OC[C@H](COP(=O)([O-])OCC[N+](C)(C)C)OC(=O)CCC/C=C\C/C=C\C/C=C\C/C=C\CCCCC	0.110868	1.01924
PC 36:6	SPWBDEZMKCRQSX-NGPPOSSDSA-N	52922847	CCCCC/C=C\C/C=C\C/C=C\CCCCC(=O)O[C@H](COC(=O)CCCCCCC/C=C\C/C=C\C/C=C\CC)COP(=O)([O-])OCC[N+](C)(C)C	1.2547e-08	0.570562
PC 37:2	MCZUABDVGPPWPM-HJTCUGKVSA-N	52922735	CCCCCCCCCCCCCCCCCCC(=O)O[C@H](COC(=O)CCCCCCC/C=C\C/C=C\CCCCC)COP(=O)([O-])OCC[N+](C)(C)C	8.04855e-09	0.743345
PC 37:3	OOYQEEUUQRMQKL-JUUDQZDJSA-N	52922851	CCCCCCCCCCCCCCCCCCC(=O)O[C@H](COC(=O)CCCCCCC/C=C\C/C=C\C/C=C\CC)COP(=O)([O-])OCC[N+](C)(C)C	0.00494066	0.785523
PC 37:4	QRPUCJXFPYFTMB-FBFLODOBSA-N	52922853	CCCCCCCCC/C=C\CCCCCCCC(=O)O[C@H](COC(=O)CCCCCCC/C=C\C/C=C\C/C=C\CC)COP(=O)([O-])OCC[N+](C)(C)C	2.82872e-08	0.707237
PC 38:2	KXXLFCAPKGRXBT-FMJYHZMHSA-N	24779263	CCCCCCCCCCCCCCCCCCCC(=O)OC[C@H](COP(=O)([O-])OCC[N+](C)(C)C)OC(=O)CCCCCCC/C=C\C/C=C\CCCCC	2.88209e-09	0.755453
PC 38:3	OJHJKEBRZSDTTL-VHWCKNCUSA-N	52922741	CCCCCCCC/C=C\CCCCCCCCCC(=O)O[C@H](COC(=O)CCCCCCC/C=C\C/C=C\CCCCC)COP(=O)([O-])OCC[N+](C)(C)C	0.00530096	0.799102
PC 38:4	DNYKSJQVBCVGOF-LCKGXUDJSA-N	52923291	CCCCCCCCCCCCCCCCCC(=O)O[C@H](COC(=O)CCC/C=C\C/C=C\C/C=C\C/C=C\CCCCC)COP(=O)([O-])OCC[N+](C)(C)C	0.000578169	0.875542
PC 38:5	YLWBKBDNHWQEFU-YJXJLLHLSA-N	53479033	CCCCCC/C=C\CCCCCCCCCC(=O)O[C@H](COC(=O)CCC/C=C\C/C=C\C/C=C\C/C=C\CCCCC)COP(=O)([O-])OCC[N+](C)(C)C	2.7412e-06	0.604539
PC 38:6	PLZBTDKJYHXIEW-DZUXOTHRSA-N	52923295	CCCCC/C=C\C/C=C\CCCCCCCC(=O)O[C@H](COC(=O)CCC/C=C\C/C=C\C/C=C\C/C=C\CCCCC)COP(=O)([O-])OCC[N+](C)(C)C	0.00795273	0.847891
PC 38:8	QQNHCRBGLPDWEW-LRFGEVPTSA-N	52922865	CC/C=C\C/C=C\C/C=C\CCCCCCCC(=O)OC[C@H](COP(=O)([O-])OCC[N+](C)(C)C)OC(=O)CCC/C=C\C/C=C\C/C=C\C/C=C\C/C=C\CC	8.44857e-09	0.408655
PC 40:2	AEUCYCQYAUFAKH-DITNKEBASA-N	24779063	CCCCCCCC/C=C\CCCCCCCCCC(=O)OC[C@H](COP(=O)([O-])OCC[N+](C)(C)C)OC(=O)CCCCCCCCC/C=C\CCCCCCCC	4.4096e-05	0.760692
PC 40:5	LJFKFKIYUJNFPZ-ZLFSCUDPSA-N	52923133	CCCCCCCC/C=C\CCCCCCCCCC(=O)OC[C@H](COP(=O)([O-])OCC[N+](C)(C)C)OC(=O)CCC/C=C\C/C=C\C/C=C\C/C=C\CCCCC	0.00221175	0.736816
PC 40:6	TYRTWVKQVGNGSZ-RGBTVBCDSA-N	52923195	CCCCC/C=C\C/C=C\CCCCCCCCCC(=O)OC[C@H](COP(=O)([O-])OCC[N+](C)(C)C)OC(=O)CCC/C=C\C/C=C\C/C=C\C/C=C\CCCCC	0.000103163	0.730511
PC 40:7	BPUROMFCPFGBOT-ZEGPSQTJSA-N	24778982	CCCCC/C=C\C/C=C\CCCCCCCC(=O)OC[C@H](COP(=O)([O-])OCC[N+](C)(C)C)OC(=O)CC/C=C\C/C=C\C/C=C\C/C=C\C/C=C\CCCCC	0.0355236	0.857048
PC 42:1	PAHPUCKPYBHMBM-RURDTVAGSA-N	24778881	CCCCCCCCCCCCCCCCCC(=O)OC[C@H](COP(=O)([O-])OCC[N+](C)(C)C)OC(=O)CCCCCCCCCCCCC/C=C\CCCCCCCC	0.973673	0.996397
PC 42:4	SGYNBRXEOXADHS-CIUHTZMDSA-N	24779052	CCCCCCCCCCCCCCCCCCCC(=O)OC[C@H](COP(=O)([O-])OCC[N+](C)(C)C)OC(=O)CCCCC/C=C\C/C=C\C/C=C\C/C=C\C/C=C\CC	0.533103	1.04034
PC 42:6	DSVRMAGYENFTLY-GDDYDVMSSA-N	52923651	CCCCC/C=C\C/C=C\CCCCCCCCCC(=O)O[C@H](COC(=O)CCCCC/C=C\C/C=C\C/C=C\C/C=C\CCCCC)COP(=O)([O-])OCC[N+](C)(C)C	2.40288e-06	0.579764
PC 44:3	GZZUNXHFXFGEBB-MXZPZXETSA-N	52923541	CCCCCCCCCC/C=C\CCCCCCCCCC(=O)OC[C@H](COP(=O)([O-])OCC[N+](C)(C)C)OC(=O)CCCCCCCCCCC/C=C\C/C=C\CCCCC	0.00289337	0.839673
PC 44:4	UIAAGLPOUUFIRG-ZUEQPGPOSA-N	52923481	CCCCCCCCCCCCCCCCCCCCCC(=O)OC[C@H](COP(=O)([O-])OCC[N+](C)(C)C)OC(=O)CCCCC/C=C\C/C=C\C/C=C\C/C=C\CCCCC	0.841441	1.01253
PC p34:1	OIICTMOQBYZCDA-IIKIFWEUSA-N	11125520	CCCCCCCCCCCCCCCC/C=C\OC[C@H](COP(=O)([O-])OCC[N+](C)(C)C)OC(=O)CCCCCCCCCCCCCCC	0.0305778	0.905075
PC p34:2	KMNVIRCHUMQGHD-RCINKDPXSA-N	52923934	CCCCCCCCCCCCCCCC/C=C\OC[C@H](COP(=O)([O-])OCC[N+](C)(C)C)OC(=O)CCCCCCC/C=C\CCCCCC	6.24859e-05	0.814452
PC p34:3	QLEHHUPUHJPURI-PWYDUFMYSA-N	24779386	CCCCCCCCCCCCCC/C=C\OC[C@H](COP(=O)([O-])OCC[N+](C)(C)C)OC(=O)CCCCCCC/C=C\C/C=C\CCCCC	0.0591347	0.898134
PC p36:3	SOUZQPFUXRVDGK-KCTKZSJBSA-N	53481701	CCCCCCCCCCCCCCCCOC[C@H](COP(=O)([O-])OCC[N+](C)(C)C)OC(=O)CCCCCC/C=C\C/C=C\C/C=C\C/C=C\CC	0.00451974	0.863708
PC p36:4	IOYKZPNDXIIXLN-LOQSCQKMSA-N	24779388	CCCCCCCCCCCCCC/C=C\OC[C@H](COP(=O)([O-])OCC[N+](C)(C)C)OC(=O)CCC/C=C\C/C=C\C/C=C\C/C=C\CCCCC	0.0122195	0.865207
PC p38:3	WOSDZWBQBJHAMR-NOQLVGMBSA-N	52925093	CCCCCCCCCCCCCCCC/C=C\OC[C@H](COP(=O)(O)OCCN)OC(=O)CCCCCCCCCCC/C=C\C/C=C\CCCCC	0.000671409	0.771654
PC p38:4	BAKDTVUHENQVRW-IXXGCMLPSA-N	52925117	CCCCCCCCCCCCCCCCCC/C=C\OC[C@H](COP(=O)(O)OCCN)OC(=O)CCCCCC/C=C\C/C=C\C/C=C\CCCCC	0.216561	0.940131
PE 34:2	HBZNVZIRJWODIB-NHCUFCNUSA-N	46891780	CCCCCCCCCCCCCCCC(=O)OC[C@H](COP(=O)([O-])OCC[NH3+])OC(=O)CCCCCCC/C=C\C/C=C\CCCCC	0.00537167	0.716345
PE 36:2	DXXUYBAISOHOLM-XRIXOMQFSA-N	52924894	CCCCCCCCCCCCCCCCCC(=O)O[C@H](COC(=O)CCCCCCC/C=C\C/C=C\CCCCC)COP(=O)(O)OCCN	4.37824e-10	0.619251
PE 36:3	GKAFCSRKMWFPSJ-RJXNKANHSA-N	71728379	CCCCCCCC/C=C\CCCCCCCC(=O)OC[C@H](COP(=O)([O-])OCC[NH3+])OC(=O)CCCCCCC/C=C\C/C=C\CCCCC	0.856769	0.992141
PE 36:4	DUQDVNACTOXOJA-KTKXOIIHSA-N	52924875	CCCCCCCCCCCCCCCC(=O)O[C@H](COC(=O)CCC/C=C\C/C=C\C/C=C\C/C=C\CCCCC)COP(=O)(O)OCCN	0.00231984	0.773702
PE 38:2	CLPMAPXZURYSNH-CNBLIUODSA-N	9546825	CCCCCCCCCCCCCCCCCCCC(=O)OC[C@H](COP(=O)(O)OCCN)OC(=O)CCCCCCC/C=C\C/C=C\CCCCC	2.40262e-11	0.667505
PE 38:4	ANRKEHNWXKCXDB-BHFWLYLHSA-N	46891781	CCCCCCCCCCCCCCCCCC(=O)OC[C@H](COP(=O)([O-])OCC[NH3+])OC(=O)CCC/C=C\C/C=C\C/C=C\C/C=C\CCCCC	0.228638	0.736067
PE 38:6	LFGBKOUQHCWBQI-BZGLIJSBSA-N	52924893	CCCCC/C=C\C/C=C\CCCCCCCC(=O)OC[C@H](COP(=O)(O)OCCN)OC(=O)CCC/C=C\C/C=C\C/C=C\C/C=C\CCCCC	0.00449911	0.757216
PE 40:6	FEABWDMFZNBFCT-KUVQHVNNSA-N	52924379	CCCCC/C=C\C/C=C\CCCCCCCC(=O)OC[C@H](COP(=O)(O)OCCN)OC(=O)CCCCC/C=C\C/C=C\C/C=C\C/C=C\CCCCC	0.00289337	0.816993
Phosphatidylglycerol 29:0	RYHJACYQTJIGMZ-JHOUSYSJSA-N	52926457	CCCCCCCCCCCCCCCC(=O)OC[C@H](COP(=O)(O)OC[C@H](CO)O)OC(=O)CCCCCCCCCCCC	0.25202	1.02535
Plasmenyl-PC 34:2	IQACMFWAGALEAQ-WESJWMGVSA-N	6443157	CCCCCCCCCCCCCCCCOC[C@H](COP(=O)([O-])OCC[N+](C)(C)C)OC(=O)CCCCCCC/C=C\C/C=C\CCCCC	0.626602	0.953596
Plasmenyl-PC 36:6	JCIBOIAZHLGPOT-YAYDGDQKSA-N	70698851	CCCCCC/C=C\CCCCCCCC/C=C\O[C@H](COC(=O)CCCC/C=C\C/C=C\C/C=C\C/C=C\CC)COP(=O)([O-])OCC[N+](C)(C)C	0.000428134	0.838361
Plasmenyl-PC 38:5	FHHVIBPVBBRLOR-IYACIECVSA-N	24779390	CCCCCCCCCCCCCCCC/C=C\OC[C@H](COP(=O)([O-])OCC[N+](C)(C)C)OC(=O)CCC/C=C\C/C=C\C/C=C\C/C=C\CCCCC	0.000111057	0.740084
Plasmenyl-PE 36:3	XVXISDREVDGQPX-PISDLAQISA-N	52925079	CCCCCCCCCCCCCCCC/C=C\OC[C@H](COP(=O)(O)OCCN)OC(=O)CCCCCCC/C=C\C/C=C\CCCCC	0.000695067	0.782141
Plasmenyl-PE 36:5	UUYSKERSKRMYME-MAIXUNBTSA-N	52925126	CCCCCCCCCCCCCC/C=C\OC[C@H](COP(=O)(O)OCCN)OC(=O)CCC/C=C\C/C=C\C/C=C\C/C=C\CCCCC	0.00183825	0.791826
Plasmenyl-PE 36:6	RLLOITCRNQRGJD-DFAKUSJGSA-N	52925061	CCCCCCCCCCCCCC/C=C\OC[C@H](COP(=O)(O)OCCN)OC(=O)CCC/C=C\C/C=C\C/C=C\C/C=C\C/C=C\CC	1.77541e-05	0.49585
Plasmenyl-PE 38:5	URPXXNCTXCOATD-FXMFQVEGSA-N	86289532	CCCCCCCCCCCCCCCC/C=C\OC[C@H](COP(=O)([O-])OCC[NH3+])OC(=O)CCC/C=C\C/C=C\C/C=C\C/C=C\CCCCC	3.48539e-05	0.761787
Plasmenyl-PE 38:6	KCNBSSYOJRUKOM-JALPNNRCSA-N	52925089	CCCCCCCCCCCCCCCC/C=C\OC[C@H](COP(=O)(O)OCCN)OC(=O)CCC/C=C\C/C=C\C/C=C\C/C=C\C/C=C\CC	0.03863	0.865823
Plasmenyl-PE 38:7	WVGALBKSWOUIEZ-XNHMFJFDSA-N	5283497	CCCCCCCCCCCCCC/C=C\OC[C@H](COP(=O)(O)OCCN)OC(=O)CC/C=C\C/C=C\C/C=C\C/C=C\C/C=C\C/C=C\CC	0.0129609	0.812022
Plasmenyl-PE 40:6	CVCZYWPCMUWTNS-IXKBFPPMSA-N	52925119	CCCCCCCCCCCCCCCCCC/C=C\OC[C@H](COP(=O)(O)OCCN)OC(=O)CCC/C=C\C/C=C\C/C=C\C/C=C\C/C=C\CC	0.00533866	0.703702
Plasmenyl-PE 40:7	FIJFPUAJUDAZEY-MNDXXDKYSA-N	42607458	CCCCCCCCCCCCCCCC/C=C\OC[C@H](COP(=O)(O)OCCN)OC(=O)CC/C=C\C/C=C\C/C=C\C/C=C\C/C=C\C/C=C\CC	0.000179734	0.729175
PS 38:3	BQBTWCBZEKRLFP-BGFRNLFWSA-N	52925523	CCCCCCCCCCCCCCCCCCCC(=O)O[C@H](COC(=O)CCCCCCC/C=C\C/C=C\C/C=C\CC)COP(=O)(O)OC[C@@H](C(=O)O)N	0.000868516	0.918083
PS 38:4	SVOUGFFDROZBJI-DNALCEECSA-N	24779545	CCCCCCCCCCCCCCCCCC(=O)OC[C@H](COP(=O)(O)OC[C@@H](C(=O)O)N)OC(=O)CCC/C=C\C/C=C\C/C=C\C/C=C\CCCCC	0.996965	1.00005
PS 40:3	BTIQFPURPAGQHS-HOSNKBABSA-N	52925502	CCCCCCCCCCCCCCCCCCCCCC(=O)O[C@H](COC(=O)CCCC/C=C\C/C=C\C/C=C\CCCCC)COP(=O)(O)OC[C@@H](C(=O)O)N	1.88454e-08	0.778701
PS 40:4	GBBNRADSWUALEU-AEDAHVLISA-N	52925748	CCCCCCCCCCCCCCCCCCCC(=O)O[C@H](COC(=O)CCC/C=C\C/C=C\C/C=C\C/C=C\CCCCC)COP(=O)(O)OC[C@@H](C(=O)O)N	0.0200743	0.956232
PS 40:6	LYYHRRPTEXPVOR-SYEOQEKUSA-N	24779546	CCCCCCCCCCCCCCCCCC(=O)OC[C@H](COP(=O)(O)OC[C@@H](C(=O)O)N)OC(=O)CC/C=C\C/C=C\C/C=C\C/C=C\C/C=C\C/C=C\CC	0.00621788	0.925916
PS 42:5	VNQACVFLMLYTLE-WDLXSBMRSA-N	52925755	CCCCCCCCCC/C=C\CCCCCCCCCC(=O)O[C@H](COC(=O)CCC/C=C\C/C=C\C/C=C\C/C=C\CCCCC)COP(=O)(O)OC[C@@H](C(=O)O)N	3.38278e-05	0.80185
PS 42:6	WOBFEYJLJCLDBR-NISVGTQTSA-N	52925756	CCCCC/C=C\C/C=C\CCCCCCCCCCCC(=O)O[C@H](COC(=O)CCC/C=C\C/C=C\C/C=C\C/C=C\CCCCC)COP(=O)(O)OC[C@@H](C(=O)O)N	0.0387698	0.907646
PS 42:8	ROCNHMAZFKRILY-PRDJOCNNSA-N	52925757	CCCCC/C=C\C/C=C\C/C=C\C/C=C\CCCCCC(=O)O[C@H](COC(=O)CCC/C=C\C/C=C\C/C=C\C/C=C\CCCCC)COP(=O)(O)OC[C@@H](C(=O)O)N	0.0395173	0.880565
PS p34:0	OHPHIZCKAAJKOG-PBSRCHRYSA-N	52926194	CCCCCCCCCCCCCCCCCC(=O)O[C@H](CO/C=C\CCCCCCCCCCCCCC)COP(=O)(O)OC[C@@H](C(=O)O)N	0.210179	0.97855
SM 33:1	LQINJRUGTUOHGS-YPDYIYJKSA-N	52931139	CCCCCCCCCCCCCCC(=O)N[C@@H](COP(=O)([O-])OCC[N+](C)(C)C)[C@@H](/C=C/CCCCCCCCCCCCC)O	6.95338e-10	0.665254
SM 34:0	QHZIGNLCLJPLCU-QPPIDDCLSA-N	9939965	CCCCCCCCCCCCCCC[C@H]([C@H](COP(=O)([O-])OCC[N+](C)(C)C)NC(=O)CCCCCCCCCCCCCCC)O	0.0981431	0.903841
SM d16:1/20:0	LKQLRGMMMAHREN-YJFXYUILSA-N	6453725	CCCCCCCCCCCCCCCCCC(=O)N[C@@H](COP(=O)([O-])OCC[N+](C)(C)C)[C@@H](/C=C/CCCCCCCCCCCCC)O	2.29421e-07	0.794908
SM d16:1/20:1	NBEADXWAAWCCDG-QDDWGVBQSA-N	6443882	CCCCCCCCCCCCC/C=C/[C@H]([C@H](COP(=O)([O-])OCC[N+](C)(C)C)NC(=O)CCCCCCC/C=C\CCCCCCCC)O	2.42114e-07	0.803857
SM d18:1/14:0	KYICBZWZQPCUMO-PSALXKTOSA-N	11433862	CCCCCCCCCCCCC/C=C/[C@H]([C@H](COP(=O)([O-])OCC[N+](C)(C)C)NC(=O)CCCCCCCCCCCCC)O	9.29772e-08	0.645479
SM d18:1/16:0	RWKUXQNLWDTSLO-GWQJGLRPSA-N	9939941	CCCCCCCCCCCCCCCC(=O)N[C@@H](COP(=O)([O-])OCC[N+](C)(C)C)[C@@H](/C=C/CCCCCCCCCCCCC)O	1.48283e-05	0.883546
SM d18:1/16:1	YLWSJLLZUHSIEA-CKSUKHGVSA-N	52931235	CCCCCCCCCCCCCCCC(=O)N[C@@H](COP(=O)([O-])OCC[N+](C)(C)C)[C@@H](/C=C/CCCCCCCC/C=C\CCC)O	1.32502e-05	0.86112
SM d18:1/20:0	AADLTHQNYQJHQV-SVLGDMRNSA-N	44260124	CCCCCCCCCCCCCCCCCCCC(=O)N[C@@H](COP(=O)([O-])OCC[N+](C)(C)C)[C@@H](/C=C/CCCCCCCCCCCCC)O	1.55937e-05	0.795163
SM (d18:1/20:1)	MDRFMTLYKHBJTF-NQYLGBTJSA-N	52931179	CCCCCCCCCCCCC/C=C/[C@H]([C@H](COP(=O)([O-])OCC[N+](C)(C)C)NC(=O)CCCCCCCCC/C=C\CCCCCCCC)O	0.000112065	0.854348
SM d18:1/21:0	YXSZOBWVQJIWNE-QVDCKBILSA-N	52931193	CCCCCCCCCCCCCCCCCCCCC(=O)N[C@@H](COP(=O)([O-])OCC[N+](C)(C)C)[C@@H](/C=C/CCCCCCCCCCCCC)O	8.96421e-07	0.681675
SM d18:1/22:0	FJJANLYCZUNFSE-TWKUQIQBSA-N	44260125	CCCCCCCCCCCCCCCCCCCCCC(=O)N[C@@H](COP(=O)([O-])OCC[N+](C)(C)C)[C@@H](/C=C/CCCCCCCCCCCCC)O	0.0306838	0.913782
SM d18:1/23:0	SXZWBNWTCVLZJN-NMIJJABPSA-N	46891684	CCCCCCCCCCCCCCCCCCCCCCC(=O)N[C@@H](COP(=O)([O-])OCC[N+](C)(C)C)[C@@H](/C=C/CCCCCCCCCCCCC)O	1.45847e-06	0.792221
SM d18:1/24:0	QEDPUVGSSDPBMD-XTAIVQBESA-N	44260127	CCCCCCCCCCCCCCCCCCCCCCCC(=O)N[C@@H](COP(=O)([O-])OCC[N+](C)(C)C)[C@@H](/C=C/CCCCCCCCCCCCC)O	0.841441	1.01688
SM d18:2/23:0	JBDGKEXQKCCQFK-JWQIMADESA-N	52931209	CCCCCCCCCCCCCCCCCCCCCCC(=O)N[C@@H](COP(=O)([O-])OCC[N+](C)(C)C)[C@@H](/C=C/CCCCCCCC/C=C\CCC)O	3.07231e-12	0.720783
SM d18:2/24:0	DACOGJMBYLZYDH-GXJPFUDISA-N	52931217	CCCCCCCCCCCCCCCCCCCCCCCC(=O)N[C@@H](COP(=O)([O-])OCC[N+](C)(C)C)[C@@H](/C=C/CCCCCCCC/C=C\CCC)O	0.00350996	0.858531
SM (d18:2/24:1)	TXFLWJQVQCDUDZ-BRUGZULGSA-N	52931215	CCCCCCCC/C=C\CCCCCCCCCCCCCC(=O)N[C@@H](COP(=O)([O-])OCC[N+](C)(C)C)[C@@H](/C=C/CCCCCCCC/C=C\CCC)O	2.15016e-05	0.854614
TG 42:0	DUXYWXYOBMKGIN-UHFFFAOYSA-N	11148	CCCCCCCCCCCCCC(=O)OCC(COC(=O)CCCCCCCCCCCCC)OC(=O)CCCCCCCCCCCCC	2.15016e-05	0.316805
TG 44:1	UZLGGKDLJGDGEY-WVSHCNQOSA-N	56936554	CCCCCCCCCCCCCC(=O)OC[C@H](COC(=O)CCCCCCC/C=C\CCCCCC)OC(=O)CCCCCCCCCCCCC	2.40288e-06	0.280122
TG 46:0	JWVXCFSNEOMSHH-YACUFSJGSA-N	91865745	CCCCCCCCCCCCCCCC(=O)OC[C@@H](COC(=O)CCCCCCCCCCCCC)OC(=O)CCCCCCCCCCCCCCC	1.13112e-07	0.353046
TG 46:1	RSDIQTNCDWUNDP-JHXSWNAYSA-N	56936558	CCCCCCCCCCCCCC(=O)OC[C@H](COC(=O)CCCCCCC/C=C\CCCCCCCC)OC(=O)CCCCCCCCCCCCC	4.80614e-06	0.31546
TG 46:2	XUEMVUXNOCIHLG-MOFPORNTSA-N	56936582	CCCCCCCCCCCCCC(=O)OC[C@H](COC(=O)CCCCCCC/C=C\CCCCCC)OC(=O)CCCCCCC/C=C\CCCCCC	0.000179734	0.410531
TG 46:3	AQARPXOEHQBBQN-OJJDTYCWSA-N	56936561	CCCCCCCCCCCCCC(=O)OC[C@H](COC(=O)CCCCCCC/C=C\C/C=C\C/C=C\CC)OC(=O)CCCCCCCCCCCCC	5.65094e-05	0.456498
TG 48:0	PVNIQBQSYATKKL-UHFFFAOYSA-N	11147	CCCCCCCCCCCCCCCC(=O)OCC(COC(=O)CCCCCCCCCCCCCCC)OC(=O)CCCCCCCCCCCCCCC	1.49331e-05	0.534723
TG 48:1	FEKLSEFRUGWUOS-DLOIZKPKSA-N	9543986	CCCCCCCCCCCCCCCC(=O)OC[C@H](COC(=O)CCCCCCC/C=C\CCCCCC)OC(=O)CCCCCCCCCCCCCCC	5.55979e-07	0.464367
TG 48:2	RUOVJPPUXXFZPC-YZEIBMOJSA-N	9543987	CCCCCCCCCCCCCCCC(=O)OC[C@H](COC(=O)CCCCCCC/C=C\CCCCCC)OC(=O)CCCCCCC/C=C\CCCCCC	1.45847e-06	0.421898
TG 48:3	SKGWNZXOCSYJQL-BUTYCLJRSA-N	9543989	CCCCCC/C=C\CCCCCCCC(=O)OCC(OC(=O)CCCCCCC/C=C\CCCCCC)COC(=O)CCCCCCC/C=C\CCCCCC	0.00357647	0.546875
TG 49:0	TTWJTJMWHOYBPQ-ANFMRNGASA-N	9543988	CCCCCCCCCCCCCCCCC(=O)OC[C@@H](COC(=O)CCCCCCCCCCCCCCC)OC(=O)CCCCCCCCCCCCCCC	1.41034e-09	0.366346
TG 49:1	VYYGQDOPVVYUKW-UKFBYESTSA-N	9543991	CCCCCCCCCCCCCCCC(=O)OC[C@H](COC(=O)CCCCCCC/C=C\CCCCCCC)OC(=O)CCCCCCCCCCCCCCC	2.47258e-11	0.322813
TG 49:2	QZYSUBAQYSVFNX-PSMULLBHSA-N	9543993	CCCCCCCCCCCCCCCCC(=O)OC[C@@H](COC(=O)CCCCCCC/C=C\CCCCCC)OC(=O)CCCCCCC/C=C\CCCCCC	3.07231e-12	0.384357
TG 50:0	QRJMBNGGFSPTQP-BXJPYAOGSA-N	3246958	[2H]C([2H])(C([2H])(C([2H])([2H])OC(=O)CCCCCCCCCCCCCCC)OC(=O)CCCCCCCCCCCCCCCCC)OC(=O)CCCCCCCCCCCCCCC	4.64917e-05	0.449577
TG 50:1	YHMDGPZOSGBQRH-YYSBDVFPSA-N	25240460	CCCCCCCCCCCCCCCC(=O)OC[C@H](COC(=O)CCCCCCC/C=C\CCCCCCCC)OC(=O)CCCCCCCCCCCCCCC	0.000826273	0.740835
TG 50:2	QEZWFCZNHWUARW-XQCAQTCHSA-N	9544010	CCCCCCCCCCCCCCCCCC(=O)OC[C@@H](COC(=O)CCCCCCC/C=C\CCCCCC)OC(=O)CCCCCCC/C=C\CCCCCC	0.000965944	0.761313
TG 50:3	UFHNZOACKFBCOM-YXKNDSBASA-N	25240357	CCCCCCCC/C=C\CCCCCCCC(=O)OC[C@@H](COC(=O)CCCCCCC/C=C\CCCCCC)OC(=O)CCCCCCC/C=C\CCCCCC	0.00471306	0.731599
TG 50:4	PVMBAGXWHHZKFP-JMPJWMFJSA-N	25240359	CCCCCC/C=C\CCCCCCCC(=O)OC[C@H](COC(=O)CCCCCCC/C=C\C/C=C\CCCCC)OC(=O)CCCCCCC/C=C\CCCCCC	0.00452152	0.700066
TG 50:5	AFTBPUXZTDLRSP-UDQIKIEDSA-N	9544045	CCCCCC/C=C\CCCCCCCC(=O)OC[C@H](COC(=O)CCCCCCC/C=C\C/C=C\C/C=C\CC)OC(=O)CCCCCCC/C=C\CCCCCC	0.00955203	0.719996
TG 51:1	OZAXLAGNPZMZAD-BOEMPQCLSA-N	9544006	CCCCCCCCCCCCCCCCC(=O)OC[C@H](COC(=O)CCCCCCC/C=C\CCCCCCC)OC(=O)CCCCCCCCCCCCCCCC	1.41034e-09	0.362155
TG 51:2	NSNSZGBCOIKUBU-SZOKBDNISA-N	9544013	CCCCCCCCCCCCCCCCC(=O)OC[C@H](COC(=O)CCCCCCC/C=C\CCCCCCC)OC(=O)CCCCCCC/C=C\CCCCCCC	9.33388e-10	0.452964
TG 51:3	ISSGPXMQOMAFMJ-DMGKHJLRSA-N	9544023	CCCCCCC/C=C\CCCCCCCC(=O)OCC(OC(=O)CCCCCCC/C=C\CCCCCCC)COC(=O)CCCCCCC/C=C\CCCCCCC	1.57533e-07	0.618763
TG 51:4	IIRQXNVLAXQEKB-KBEZCZBDSA-N	9544052	CCCCCCCC/C=C\CCCCCCCC(=O)OC[C@@H](COC(=O)CCCCCCC/C=C\CCCCCC)OC(=O)CCCCCCC/C=C\C/C=C\CCCC	1.99524e-05	0.650398
TG 52:0	SDNYRTVJOFMYIW-OIVUAWODSA-N	545690	CCCCCCCCCCCCCCCCCC(=O)OC[C@@H](COC(=O)CCCCCCCCCCCCCCC)OC(=O)CCCCCCCCCCCCCCCCC	0.00100727	0.534072
TG 52:1	NPCZZYKITFKRQZ-FQUZZJBASA-N	25240360	CCCCCCCCCCCCCCCCCC(=O)O[C@H](COC(=O)CCCCCCCCCCCCCCC)COC(=O)CCCCCCC/C=C\CCCCCCCC	0.000124919	0.532181
TG 52:2	KGLAHZTWGPHKFF-RISKEULASA-N	25240361	CCCCCCCCCCCCCCCC(=O)OC[C@H](COC(=O)CCCCCCC/C=C\C/C=C\CCCCC)OC(=O)CCCCCCC/C=C\CCCCCCCC	0.158367	0.934337
TG 52:4	WHSWXEYWNPTUPW-HNJDVRDNSA-N	25240364	CCCCCCCC/C=C\CCCCCCCC(=O)O[C@H](COC(=O)CCCCCCC/C=C\CCCCCC)COC(=O)CCCCCCC/C=C\C/C=C\CCCCC	0.926481	1.01081
TG 52:5	CQZAAIKPSLHIBC-KDJOUNIJSA-N	25240366	CCCCCC/C=C\CCCCCCCC(=O)OC[C@H](COC(=O)CCCCCCC/C=C\C/C=C\CCCCC)OC(=O)CCCCCCC/C=C\C/C=C\CCCCC	0.841441	0.968829
TG 53:0	ZJUXHXMIKPSINE-IONAWPRUSA-N	9544181	CCCCCCCCCCCCCCCCCCCCC(=O)OC[C@@H](COC(=O)CCCCCCCCCCCCCCC)OC(=O)CCCCCCCCCCCCCCC	4.82159e-06	0.582144
TG 53:1	WWJIBIGWKGFVAQ-JNSYTQKUSA-N	9544081	CCCCCCCCCCCCCCCCCC(=O)OC[C@@H](COC(=O)CCCCCCC/C=C\CCCCCCC)OC(=O)CCCCCCCCCCCCCCCCC	3.70985e-07	0.355708
TG 53:2	RSINITWKVQRWSZ-RFVLVDBCSA-N	9544102	CCCCCCCCCCCCCCCCCC(=O)OC[C@@H](COC(=O)CCCCCCC/C=C\C/C=C\CCCC)OC(=O)CCCCCCCCCCCCCCCCC	1.21199e-07	0.554688
TG 53:3	ZNQBEJJYVJSZLM-LEDQTTRKSA-N	9544126	CCCCCCCC/C=C\CCCCCCCC(=O)OC[C@@H](COC(=O)CCCCCCC/C=C\CCCCCCC)OC(=O)CCCCCCC/C=C\CCCCCCCC	1.55937e-05	0.620427
TG 53:4	BMSDHYZLQWTKSQ-LSJAAEOESA-N	9544152	CCCCCCCC/C=C\CCCCCCCC(=O)OC[C@@H](COC(=O)CCCCCCC/C=C\C/C=C\CCCC)OC(=O)CCCCCCC/C=C\CCCCCCCC	0.000719141	0.759466
TG 53:5	QHYAATSKYBYSLG-BXDFBOBBSA-N	9544183	CCCCCCC/C=C\CCCCCCCC(=O)OC[C@H](COC(=O)CCCCCCC/C=C\C/C=C\CCCCC)OC(=O)CCCCCCC/C=C\C/C=C\CCCCC	0.0387698	0.790022
TG 54:0	DCXXMTOCNZCJGO-UHFFFAOYSA-N	11146	CCCCCCCCCCCCCCCCCC(=O)OCC(COC(=O)CCCCCCCCCCCCCCCCC)OC(=O)CCCCCCCCCCCCCCCCC	0.110868	0.808225
TG 54:1	YFFIQXNTTVSKJC-NZEOUKRFSA-N	16058371	CCCCCCCCCCCCCCCCCC(=O)OC[C@H](COC(=O)CCCCCCC/C=C\CCCCCCCC)OC(=O)CCCCCCCCCCCCCCCCC	0.00031013	0.520301
TG 54:2	RYNHWWNZNIGDAQ-BMTCQUSZSA-N	16058372	CCCCCCCCCCCCCCCCCC(=O)OC[C@H](COC(=O)CCCCCCC/C=C\CCCCCCCC)OC(=O)CCCCCCC/C=C\CCCCCCCC	0.00381101	0.673609
TG 54:3	PHYFQTYBJUILEZ-IUPFWZBJSA-N	5497163	CCCCCCCC/C=C\CCCCCCCC(=O)OCC(OC(=O)CCCCCCC/C=C\CCCCCCCC)COC(=O)CCCCCCC/C=C\CCCCCCCC	0.619861	1.04337
TG 54:4	BRLGHZXETDWABO-NOFIOOQLSA-N	9544255	CCCCCCCCCCCCCCCCCC(=O)OC[C@H](COC(=O)CCCCCCC/C=C\C/C=C\C/C=C\CC)OC(=O)CCCCCCC/C=C\CCCCCCCC	0.0878933	1.18312
TG 54:5	VVEBTVMJPTZDHO-YQFZQLSNSA-N	25240373	CCCCCCCC/C=C\CCCCCCCC(=O)OC[C@H](COC(=O)CCCCCCC/C=C\C/C=C\CCCCC)OC(=O)CCCCCCC/C=C\C/C=C\CCCCC	0.253218	1.1443
TG 54:6	HBOQXIRUPVQLKX-BBWANDEASA-N	5322095	CCCCC/C=C\C/C=C\CCCCCCCC(=O)OCC(OC(=O)CCCCCCC/C=C\C/C=C\CCCCC)COC(=O)CCCCCCC/C=C\C/C=C\CCCCC	0.103198	1.31894
TG 54:8	BMPVTDWOWBNPJU-NYRSPQLFSA-N	9544413	CCCCC/C=C\C/C=C\C/C=C\C/C=C\CCCC(=O)OC[C@@H](COC(=O)CCCCCCC/C=C\C/C=C\CCCC)OC(=O)CCCCCCC/C=C\C/C=C\CCCC	0.129439	0.75154
TG 56:1	OCYFAHIHWCVZKS-FHSLLVMSSA-N	9544345	CCCCCCCCCCCCCCCCCCCC(=O)OC[C@@H](COC(=O)CCCCCCCCCCCCCCCCC)OC(=O)CCCCCCC/C=C\CCCCCCCC	0.0126141	0.666726
TG 56:2	PDEQUPGHMOMBFC-FYEHETCMSA-N	9544390	CCCCCCCCCCCCCCCCCCCC(=O)OC[C@@H](COC(=O)CCCCCCCCCCCCCCCCC)OC(=O)CCCCCCC/C=C\C/C=C\CCCCC	0.156953	0.810185
TG 56:3	QXMHHXQBBKDSSL-BAQZNRHJSA-N	9544447	CCCCCCCC/C=C\CCCCCCCCCC(=O)OC[C@@H](COC(=O)CCCCCCC/C=C\CCCCCCCC)OC(=O)CCCCCCC/C=C\CCCCCCCC	0.17857	0.820229
TG 56:4	YONCDTJKIZDSKQ-IYASBODOSA-N	25240379	CCCCCCCC/C=C\CCCCCCCCCC(=O)OC[C@@H](COC(=O)CCCCCCC/C=C\CCCCCCCC)OC(=O)CCCCCCC/C=C\C/C=C\CCCCC	0.0355236	1.37249
TG 56:5	UHEJWASONFIROS-YPSHDQQVSA-N	25240380	CCCCCCCC/C=C\CCCCCCCCCC(=O)OC[C@@H](COC(=O)CCCCCCC/C=C\C/C=C\CCCCC)OC(=O)CCCCCCC/C=C\C/C=C\CCCCC	0.850719	0.967437
TG 56:6	ZTNDRFCABXFVMY-WJTCTALZSA-N	9544625	CCCCC/C=C\C/C=C\CCCCCCCCCC(=O)OC[C@@H](COC(=O)CCCCCCC/C=C\C/C=C\CCCCC)OC(=O)CCCCCCC/C=C\C/C=C\CCCCC	0.00381101	0.732942
TG 56:7	DODZUDCYRVWEOJ-GKZBLMSTSA-N	9544695	CCCCC/C=C\C/C=C\CCCCCCCC(=O)OC[C@H](COC(=O)CCCCCC/C=C\C/C=C\C/C=C\CCCCC)OC(=O)CCCCCCC/C=C\C/C=C\CCCCC	0.0383227	0.79291
TG 56:8	UBGUHMDKBGQUND-VPFWBQFRSA-N	9544762	CCCCCCCCCCCCCCCC(=O)OC[C@H](COC(=O)CCC/C=C\C/C=C\C/C=C\C/C=C\CCCCC)OC(=O)CCC/C=C\C/C=C\C/C=C\C/C=C\CCCCC	0.742322	0.937541
TG 58:1	OWZMHFAFGQCCNI-FBXRAONGSA-N	25240381	CCCCCCCCCCCCCCCCCCCC(=O)OC[C@@H](COC(=O)CCCCCCC/C=C\CCCCCCCC)OC(=O)CCCCCCCCCCCCCCCCCCC	0.00443746	0.685921
TG 58:2	GXWBCAVCOMAOHT-VMCJOIRWSA-N	9545277	CCCCC/C=C\C/C=C\CCCCCCCC(=O)OC[C@H](COC(=O)CCC/C=C\C/C=C\C/C=C\C/C=C\CCCCC)OC(=O)CCC/C=C\C/C=C\C/C=C\C/C=C\CCCCC	0.514376	0.907156
TG 58:3	RFMSTHTUAZETPD-JJPHLYBUSA-N	9544748	CCCCCCCC/C=C\CCCCCCCCCC(=O)OC[C@@H](COC(=O)CCCCCCC/C=C\CCCCCCCC)OC(=O)CCCCCCCCC/C=C\CCCCCCCC	0.841609	0.967022
TG 58:4	CCKRHDUCFMOBKX-AAINFQTBSA-N	9544835	CCCCCCCCCCCCCCCCCCCC(=O)O[C@H](COC(=O)CCCCCCCCCCCCCCCCC)COC(=O)CCC/C=C\C/C=C\C/C=C\C/C=C\CCCCC	0.708438	0.941601
TG 58:6	GSNFRUMSEHHPSY-LCXCSEBNSA-N	9544977	CCCCCCCC/C=C\CCCCCCCCCC(=O)O[C@H](COC(=O)CCCCCCC/C=C\CCCCCCCC)COC(=O)CCC/C=C\C/C=C\C/C=C\C/C=C\CCCCC	0.000124919	0.629132
TG 58:8	KWIGMCRWEINBIR-HUPVKWKYSA-N	9545124	CCCCCCCCCCCCCCCCCC(=O)OC[C@H](COC(=O)CCC/C=C\C/C=C\C/C=C\C/C=C\CCCCC)OC(=O)CCC/C=C\C/C=C\C/C=C\C/C=C\CCCCC	0.29057	0.865204
TG 58:9	RVXFSLZMZOFGEQ-SWIIBWKZSA-N	9545200	CCCCCCCC/C=C\CCCCCCCC(=O)OC[C@H](COC(=O)CCC/C=C\C/C=C\C/C=C\C/C=C\CCCCC)OC(=O)CCC/C=C\C/C=C\C/C=C\C/C=C\CCCCC	0.637884	0.931976
TG 60:1	YNDXXWKSWMKVGO-HZLQDPIMSA-N	9544965	CCCCCCCCCCCCCCCCCCCC(=O)OC[C@H](COC(=O)CCCCCCCCC/C=C\CCCCCCCC)OC(=O)CCCCCCCCCCCCCCCCCCC	0.00357647	0.71895
TG 60:11	ASSZWZBQIXMMKM-SYTPEAHJSA-N	9545730	CCCCC/C=C\C/C=C\C/C=C\CCCCCCC(=O)OC[C@H](COC(=O)CCC/C=C\C/C=C\C/C=C\C/C=C\CCCCC)OC(=O)CCC/C=C\C/C=C\C/C=C\C/C=C\CCCCC	0.0255003	0.726909
TG 60:2	QPNVLDQSHXVPMG-JMYPUKFOSA-N	9545040	CCCCCCCCCCCCCCCCCCCC(=O)OC[C@H](COC(=O)CCCCCCCCC/C=C\CCCCCCCC)OC(=O)CCCCCCCCC/C=C\CCCCCCCC	0.613855	0.916811
TG 62:1	TZLOSVAFXBPUQT-VBMMIZSXSA-N	9545526	CCCCCCCCCCCCCCCCCCCCCC(=O)OC[C@H](COC(=O)CCCCCCCCCCCCCCCCCCC)OC(=O)CCCCCCCCC/C=C\CCCCCCCC	0.000731961	0.669517

## Sheet: Table S4
S4. Lipidome differential abundance analysis: Cluster II vs I at Visit -6
Compound Name	InChiKeys	Pubchem ID	SMILES	pvalue	foldchange
CE 18:1	RJECHNNFRHZQKU-RMUVNZEASA-N	5283632	CCCCCCCC/C=C\CCCCCCCC(=O)O[C@H]1CC[C@@]2([C@H]3CC[C@]4([C@H]([C@@H]3CC=C2C1)CC[C@@H]4[C@H](C)CCCC(C)C)C)C	0.0366165	0.849871
CE 18:2	NAACPBBQTFFYQB-LJAITQKLSA-N	5287939	CCCCC/C=C\C/C=C\CCCCCCCC(=O)O[C@H]1CC[C@@]2([C@H]3CC[C@]4([C@H]([C@@H]3CC=C2C1)CC[C@@H]4[C@H](C)CCCC(C)C)C)C	0.285244	0.903377
CE 18:3	FYMCIBHUFSIWCE-WVXFKAQASA-N	6436907	CC/C=C\C/C=C\C/C=C\CCCCCCCC(=O)O[C@H]1CC[C@@]2([C@H]3CC[C@]4([C@H]([C@@H]3CC=C2C1)CC[C@@H]4[C@H](C)CCCC(C)C)C)C	0.00122065	0.741456
CE 20:4	IMXSFYNMSOULQS-BEDFLICRSA-N	6479222	CCCCC/C=C\C/C=C\C/C=C\C/C=C\CCCC(=O)O[C@H]1CC[C@@]2([C@H]3CC[C@]4([C@H]([C@@H]3CC=C2C1)CC[C@@H]4[C@H](C)CCCC(C)C)C)C	0.0123251	0.778534
CE 22:6	VOEVEGPMRIYYKC-HNJOWPRISA-N	14274978	CC/C=C\C/C=C\C/C=C\C/C=C\C/C=C\C/C=C\CCC(=O)O[C@H]1CC[C@@]2([C@H]3CC[C@]4([C@H]([C@@H]3CC=C2C1)CC[C@@H]4[C@H](C)CCCC(C)C)C)C	0.0568701	0.775108
Ceramide d18:1/23:0	NAJHAHQNQCNWOP-PUYNVXOJSA-N	52931115	CCCCCCCCCCCCCCCCCCCCCCC(=O)N[C@@H](CO)[C@@H](/C=C/CCCCCCCCCCCCC)O	0.0744796	0.875606
Ceramide d40:1	KEPQASGDXIEOIL-GLQCRSEXSA-N	5283567	CCCCCCCCCCCCCCCCCCCCCC(=O)N[C@@H](CO)[C@@H](/C=C/CCCCCCCCCCCCC)O	0.912796	0.988613
Ceramide d42:1	ZJVVOYPTFQEGPH-AUTSUKAISA-N	5283571	CCCCCCCCCCCCCCCCCCCCCCCC(=O)N[C@@H](CO)[C@@H](/C=C/CCCCCCCCCCCCC)O	0.926176	1.00869
Ceramide d42:2	VJSBNBBOSZJDKB-KPEYJIHVSA-N	5283568	CCCCCCCCCCCCC/C=C/[C@H]([C@H](CO)NC(=O)CCCCCCCCCCCCC/C=C\CCCCCCCC)O	0.318108	0.922811
Cer (d18:1/16:0)	YDNKGFDKKRUKPY-TURZORIXSA-N	5283564	CCCCCCCCCCCCCCCC(=O)N[C@@H](CO)[C@@H](/C=C/CCCCCCCCCCCCC)O	0.787339	0.977626
Cholesterol	HVYWMOMLDIMFJA-DPAQBDIFSA-N	5997	C[C@H](CCCC(C)C)[C@H]1CC[C@@H]2[C@@]1(CC[C@H]3[C@H]2CC=C4[C@@]3(CC[C@@H](C4)O)C)C	0.131726	1.02101
DG 32:0	JEJLGIQLPYYGEE-XIFFEERXSA-N	644078	CCCCCCCCCCCCCCCC(=O)OC[C@H](CO)OC(=O)CCCCCCCCCCCCCCC	0.912796	1.01823
DG 34:0	VYQDALBEQRZDPL-DHUJRADRSA-N	3246945	CCCCCCCCCCCCCCCCCC(=O)OC[C@H](CO)OC(=O)CCCCCCCCCCCCCCC	0.949806	0.992424
DG 34:1	YEJYLHKQOBOSCP-OZKTZCCCSA-N	5282283	CCCCCCCCCCCCCCCC(=O)OC[C@H](CO)OC(=O)CCCCCCC/C=C\CCCCCCCC	0.973098	1.00723
DG 36:0	UHUSDOQQWJGJQS-UHFFFAOYSA-N	102615	CCCCCCCCCCCCCCCCCC(=O)OCC(CO)OC(=O)CCCCCCCCCCCCCCCCC	0.565923	0.958589
DG 36:2	AFSHUZFNMVJNKX-LLWMBOQKSA-N	9543716	CCCCCCCC/C=C\CCCCCCCC(=O)OC[C@H](CO)OC(=O)CCCCCCC/C=C\CCCCCCCC	0.926176	1.01542
DG 36:3	BLZVZPYMHLXLHG-JOBMVARSSA-N	9543722	CCCCCCCC/C=C\CCCCCCCC(=O)OC[C@H](CO)OC(=O)CCCCCCC/C=C\C/C=C\CCCCC	0.1639	1.17758
DG 38:5	GRGDLDNREYVILP-CNWVQWJYSA-N	9543784	CCCCC/C=C\C/C=C\CCCCCCCCCC(=O)O[C@@H](CO)COC(=O)CCCCCCC/C=C\C/C=C\C/C=C\CC	0.947868	0.990033
DG 38:6	YDVDXUYJFQLPEG-CTHJWPIASA-N	9543795	CCCCC/C=C\C/C=C\C/C=C\CCCCCCC(=O)O[C@@H](CO)COC(=O)CCCCCCC/C=C\C/C=C\C/C=C\CC	0.620779	1.21255
DG 40:1	VFUWCRMMTRWZAT-JLDYGAOKSA-N	9543793	CCCCCCCCCCCCCCCCCCCC(=O)OC[C@H](CO)OC(=O)CCCCCCCCC/C=C\CCCCCCCC	0.877799	0.985478
FA 16:0	IPCSVZSSVZVIGE-UHFFFAOYSA-N	985	CCCCCCCCCCCCCCCC(=O)O	0.481913	1.07245
FA 16:1	SECPZKHBENQXJG-FPLPWBNLSA-N	445638	CCCCCC/C=C\CCCCCCCC(=O)O	0.314694	1.31282
FA 18:0	QIQXTHQIDYTFRH-UHFFFAOYSA-N	5281	CCCCCCCCCCCCCCCCCC(=O)O	0.427385	1.11163
FA 18:1	ZQPPMHVWECSIRJ-KTKRTIGZSA-N	445639	CCCCCCCC/C=C\CCCCCCCC(=O)O	0.231618	1.2568
FA 22:4	TWSWSIQAPQLDBP-DOFZRALJSA-N	5497181	CCCCC/C=C\C/C=C\C/C=C\C/C=C\CCCCCC(=O)O	0.342926	1.11731
GlcCer d18:1/22:0	YIGARKIIFOHVPF-YAEABVQUSA-N	6321359	CCCCCCCCCCCCCCCCCCCCCC(=O)N[C@@H](CO[C@H]1C(C([C@@H]([C@H](O1)CO)O)O)O)[C@@H](/C=C/CCCCCCCCCCCCC)O	0.713641	0.97142
GlcCer d18:1/24:0	POQRWMRXUOPCLD-AAAFHMTMSA-N	6321361	CCCCCCCCCCCCCCCCCCCCCCCC(=O)N[C@@H](CO[C@H]1C(C([C@@H]([C@H](O1)CO)O)O)O)[C@@H](/C=C/CCCCCCCCCCCCC)O	0.333725	0.941838
GlcCer d18:1/24:1	WBOZIXHPUPAOIA-RBELZSLISA-N	6321360	CCCCCCCCCCCCC/C=C/[C@H]([C@H](CO[C@H]1C(C([C@@H]([C@H](O1)CO)O)O)O)NC(=O)CCCCCCCCCCCCC/C=C\CCCCCCCC)O	0.166955	0.898661
LPC 18:0	IHNKQIMGVNPMTC-RUZDIDTESA-N	497299	CCCCCCCCCCCCCCCCCC(=O)OC[C@H](COP(=O)([O-])OCC[N+](C)(C)C)O	0.587976	1.07283
LPC 18:1	YAMUFBLWGFFICM-PTGWMXDISA-N	16081932	CCCCCCCC/C=C\CCCCCCCC(=O)OC[C@H](COP(=O)([O-])OCC[N+](C)(C)C)O	0.894283	1.01922
LPC 18:2	SPJFYYJXNPEZDW-FTJOPAKQSA-N	11005824	CCCCC/C=C\C/C=C\CCCCCCCC(=O)OC[C@H](COP(=O)([O-])OCC[N+](C)(C)C)O	0.737538	1.04573
LPC 20:0	UATOAILWGVYRQS-HHHXNRCGSA-N	24779473	CCCCCCCCCCCCCCCCCCCC(=O)OC[C@H](COP(=O)([O-])OCC[N+](C)(C)C)O	0.0366165	1.24055
LPC 20:1	GJTDRNFWIDPARY-GTPZACKGSA-N	24779475	CCCCCCCCCC/C=C\CCCCCCCC(=O)OC[C@H](COP(=O)([O-])OCC[N+](C)(C)C)O	0.138713	1.19633
LPC 20:2	YYQVCMMXPIJVHY-ZOIJLGJPSA-N	52924053	CCCCC/C=C\C/C=C\CCCCCCCCCC(=O)OC[C@H](COP(=O)([O-])OCC[N+](C)(C)C)O	0.28386	1.14194
LPE 18:0	BBYWOYAFBUOUFP-JOCHJYFZSA-N	46891690	CCCCCCCCCCCCCCCCCC(=O)OC[C@H](COP(=O)([O-])OCC[NH3+])O	0.595521	0.912003
LPE 18:2	DBHKHNGBVGWQJE-USWSLJGRSA-N	52925130	CCCCC/C=C\C/C=C\CCCCCCCC(=O)OC[C@H](COP(=O)(O)OCCN)O	0.216983	1.19674
LPE 20:0	HEQMDGOBDIGJOC-XMMPIXPASA-N	52925131	CCCCCCCCCCCCCCCCCCCC(=O)OC[C@H](COP(=O)(O)OCCN)O	0.81908	1.00607
LPE 20:1	JEAGLCKGAKACCE-OPSAWKISSA-N	52925139	CCCCCCCC/C=C\CCCCCCCCCC(=O)OC[C@H](COP(=O)(O)OCCN)O	0.492142	1.07853
PC 16:0/16:0	KILNVBDSWZSGLL-KXQOOQHDSA-N	452110	CCCCCCCCCCCCCCCC(=O)OC[C@H](COP(=O)([O-])OCC[N+](C)(C)C)OC(=O)CCCCCCCCCCCCCCC	0.255426	0.938166
PC 18:1/16:0	WTJKGGKOPKCXLL-VYOBOKEXSA-N	5497103	CCCCCCCCCCCCCCCC(=O)OC[C@H](COP(=O)([O-])OCC[N+](C)(C)C)OC(=O)CCCCCCC/C=C\CCCCCCCC	0.0795068	0.92546
PC 28:0	CITHEXJVPOWHKC-UUWRZZSWSA-N	5459377	CCCCCCCCCCCCCC(=O)OC[C@H](COP(=O)([O-])OCC[N+](C)(C)C)OC(=O)CCCCCCCCCCCCC	0.0420464	0.653448
PC 30:0	RFVFQQWKPSOBED-PSXMRANNSA-N	129657	CCCCCCCCCCCCCCCC(=O)O[C@H](COC(=O)CCCCCCCCCCCCC)COP(=O)([O-])OCC[N+](C)(C)C	0.00578388	0.699133
PC 32:1	QIBZFHLFHCIUOT-NPBIGWJUSA-N	6443788	CCCCCCCCCCCCCCCC(=O)OC[C@H](COP(=O)([O-])OCC[N+](C)(C)C)OC(=O)CCCCCCC/C=C\CCCCCC	0.00516522	0.739979
PC 32:2	GPWHCUUIQMGELX-VHQDNGOZSA-N	24778764	CCCCCC/C=C\CCCCCCCC(=O)OC[C@H](COP(=O)([O-])OCC[N+](C)(C)C)OC(=O)CCCCCCC/C=C\CCCCCC	0.0226792	0.781243
PC 32:3	UXEFXNOSLOCOLX-ZCHSEWAGSA-N	52922763	CCCCCCCCCCCCCC(=O)O[C@H](COC(=O)CCCC/C=C\C/C=C\C/C=C\CCCCC)COP(=O)([O-])OCC[N+](C)(C)C	0.00375836	0.703087
PC 33:1	GXTATYLPYLLNLV-MGIDVFSBSA-N	24778662	CCCCCCCCCCCCCCC(=O)OC[C@H](COP(=O)([O-])OCC[N+](C)(C)C)OC(=O)CCCCCCCCC/C=C\CCCCCC	0.000814818	0.692784
PC 34:0	PZNPLUBHRSSFHT-RRHRGVEJSA-N	24778686	CCCCCCCCCCCCCCCCCC(=O)O[C@H](COC(=O)CCCCCCCCCCCCCCC)COP(=O)([O-])OCC[N+](C)(C)C	0.182231	0.901456
PC 34:2	JLPULHDHAOZNQI-ZTIMHPMXSA-N	5287971	CCCCCCCCCCCCCCCC(=O)OC[C@H](COP(=O)([O-])OCC[N+](C)(C)C)OC(=O)CCCCCCC/C=C\C/C=C\CCCCC	0.497121	0.984281
PC 34:3	CNNSEHUKQJCGTE-UPPWDXJYSA-N	24778699	CCCCCCCCCCCCCCCC(=O)OC[C@H](COP(=O)([O-])OCC[N+](C)(C)C)OC(=O)CCCC/C=C\C/C=C\C/C=C\CCCCC	0.0123251	0.799153
PC 35:2	ZSKWZJYUVZYDQU-WESJWMGVSA-N	52922491	CCCCCCCCCCCCCCCCC(=O)OC[C@H](COP(=O)([O-])OCC[N+](C)(C)C)OC(=O)CCCCCCC/C=C\C/C=C\CCCCC	0.0120304	0.829336
PC 36:0	NRJAVPSFFCBXDT-HUESYALOSA-N	94190	CCCCCCCCCCCCCCCCCC(=O)OC[C@H](COP(=O)([O-])OCC[N+](C)(C)C)OC(=O)CCCCCCCCCCCCCCCCC	0.0966318	0.834658
PC 36:1	ATHVAWFAEPLPPQ-VRDBWYNSSA-N	24778825	CCCCCCCCCCCCCCCCCC(=O)OC[C@H](COP(=O)([O-])OCC[N+](C)(C)C)OC(=O)CCCCCCC/C=C\CCCCCCCC	0.131726	0.886024
PC 36:2	SNKAWJBJQDLSFF-NVKMUCNASA-N	10350317	CCCCCCCC/C=C\CCCCCCCC(=O)OC[C@H](COP(=O)([O-])OCC[N+](C)(C)C)OC(=O)CCCCCCC/C=C\CCCCCCCC	0.663186	0.983866
PC 36:3	BXRLDROZWDUSGM-ZRYFCQOPSA-N	24778937	CCCCCCCC/C=C\CCCCCCCC(=O)OC[C@H](COP(=O)([O-])OCC[N+](C)(C)C)OC(=O)CCCC/C=C\C/C=C\CCCCCCCC	0.21907	0.929828
PC 36:4	IIZPXYDJLKNOIY-JXPKJXOSSA-N	10747814	CCCCCCCCCCCCCCCC(=O)OC[C@H](COP(=O)([O-])OCC[N+](C)(C)C)OC(=O)CCC/C=C\C/C=C\C/C=C\C/C=C\CCCCC	0.0522113	0.916757
PC 36:5	DYDDZDMJSQYFGN-OIVUZXIWSA-N	24778771	CCCCCC/C=C\CCCCCCCC(=O)OC[C@H](COP(=O)([O-])OCC[N+](C)(C)C)OC(=O)CCC/C=C\C/C=C\C/C=C\C/C=C\CCCCC	0.528527	0.97855
PC 36:6	SPWBDEZMKCRQSX-NGPPOSSDSA-N	52922847	CCCCC/C=C\C/C=C\C/C=C\CCCCC(=O)O[C@H](COC(=O)CCCCCCC/C=C\C/C=C\C/C=C\CC)COP(=O)([O-])OCC[N+](C)(C)C	0.00432695	0.644394
PC 37:2	MCZUABDVGPPWPM-HJTCUGKVSA-N	52922735	CCCCCCCCCCCCCCCCCCC(=O)O[C@H](COC(=O)CCCCCCC/C=C\C/C=C\CCCCC)COP(=O)([O-])OCC[N+](C)(C)C	0.0722076	0.859841
PC 37:3	OOYQEEUUQRMQKL-JUUDQZDJSA-N	52922851	CCCCCCCCCCCCCCCCCCC(=O)O[C@H](COC(=O)CCCCCCC/C=C\C/C=C\C/C=C\CC)COP(=O)([O-])OCC[N+](C)(C)C	0.0227865	0.745374
PC 37:4	QRPUCJXFPYFTMB-FBFLODOBSA-N	52922853	CCCCCCCCC/C=C\CCCCCCCC(=O)O[C@H](COC(=O)CCCCCCC/C=C\C/C=C\C/C=C\CC)COP(=O)([O-])OCC[N+](C)(C)C	0.00874876	0.800503
PC 38:2	KXXLFCAPKGRXBT-FMJYHZMHSA-N	24779263	CCCCCCCCCCCCCCCCCCCC(=O)OC[C@H](COP(=O)([O-])OCC[N+](C)(C)C)OC(=O)CCCCCCC/C=C\C/C=C\CCCCC	0.151234	0.902563
PC 38:3	OJHJKEBRZSDTTL-VHWCKNCUSA-N	52922741	CCCCCCCC/C=C\CCCCCCCCCC(=O)O[C@H](COC(=O)CCCCCCC/C=C\C/C=C\CCCCC)COP(=O)([O-])OCC[N+](C)(C)C	0.0607032	0.766782
PC 38:4	DNYKSJQVBCVGOF-LCKGXUDJSA-N	52923291	CCCCCCCCCCCCCCCCCC(=O)O[C@H](COC(=O)CCC/C=C\C/C=C\C/C=C\C/C=C\CCCCC)COP(=O)([O-])OCC[N+](C)(C)C	0.285244	0.939951
PC 38:5	YLWBKBDNHWQEFU-YJXJLLHLSA-N	53479033	CCCCCC/C=C\CCCCCCCCCC(=O)O[C@H](COC(=O)CCC/C=C\C/C=C\C/C=C\C/C=C\CCCCC)COP(=O)([O-])OCC[N+](C)(C)C	0.0101955	0.687306
PC 38:6	PLZBTDKJYHXIEW-DZUXOTHRSA-N	52923295	CCCCC/C=C\C/C=C\CCCCCCCC(=O)O[C@H](COC(=O)CCC/C=C\C/C=C\C/C=C\C/C=C\CCCCC)COP(=O)([O-])OCC[N+](C)(C)C	0.166955	0.885655
PC 38:8	QQNHCRBGLPDWEW-LRFGEVPTSA-N	52922865	CC/C=C\C/C=C\C/C=C\CCCCCCCC(=O)OC[C@H](COP(=O)([O-])OCC[N+](C)(C)C)OC(=O)CCC/C=C\C/C=C\C/C=C\C/C=C\C/C=C\CC	0.000380012	0.47281
PC 40:2	AEUCYCQYAUFAKH-DITNKEBASA-N	24779063	CCCCCCCC/C=C\CCCCCCCCCC(=O)OC[C@H](COP(=O)([O-])OCC[N+](C)(C)C)OC(=O)CCCCCCCCC/C=C\CCCCCCCC	0.285244	0.901388
PC 40:5	LJFKFKIYUJNFPZ-ZLFSCUDPSA-N	52923133	CCCCCCCC/C=C\CCCCCCCCCC(=O)OC[C@H](COP(=O)([O-])OCC[N+](C)(C)C)OC(=O)CCC/C=C\C/C=C\C/C=C\C/C=C\CCCCC	0.183458	0.85124
PC 40:6	TYRTWVKQVGNGSZ-RGBTVBCDSA-N	52923195	CCCCC/C=C\C/C=C\CCCCCCCCCC(=O)OC[C@H](COP(=O)([O-])OCC[N+](C)(C)C)OC(=O)CCC/C=C\C/C=C\C/C=C\C/C=C\CCCCC	0.0568701	0.827615
PC 40:7	BPUROMFCPFGBOT-ZEGPSQTJSA-N	24778982	CCCCC/C=C\C/C=C\CCCCCCCC(=O)OC[C@H](COP(=O)([O-])OCC[N+](C)(C)C)OC(=O)CC/C=C\C/C=C\C/C=C\C/C=C\C/C=C\CCCCC	0.52391	0.931221
PC 42:1	PAHPUCKPYBHMBM-RURDTVAGSA-N	24778881	CCCCCCCCCCCCCCCCCC(=O)OC[C@H](COP(=O)([O-])OCC[N+](C)(C)C)OC(=O)CCCCCCCCCCCCC/C=C\CCCCCCCC	0.877799	0.980111
PC 42:4	SGYNBRXEOXADHS-CIUHTZMDSA-N	24779052	CCCCCCCCCCCCCCCCCCCC(=O)OC[C@H](COP(=O)([O-])OCC[N+](C)(C)C)OC(=O)CCCCC/C=C\C/C=C\C/C=C\C/C=C\C/C=C\CC	0.481913	1.05584
PC 42:6	DSVRMAGYENFTLY-GDDYDVMSSA-N	52923651	CCCCC/C=C\C/C=C\CCCCCCCCCC(=O)O[C@H](COC(=O)CCCCC/C=C\C/C=C\C/C=C\C/C=C\CCCCC)COP(=O)([O-])OCC[N+](C)(C)C	0.122194	0.745424
PC 44:3	GZZUNXHFXFGEBB-MXZPZXETSA-N	52923541	CCCCCCCCCC/C=C\CCCCCCCCCC(=O)OC[C@H](COP(=O)([O-])OCC[N+](C)(C)C)OC(=O)CCCCCCCCCCC/C=C\C/C=C\CCCCC	0.285244	0.923126
PC 44:4	UIAAGLPOUUFIRG-ZUEQPGPOSA-N	52923481	CCCCCCCCCCCCCCCCCCCCCC(=O)OC[C@H](COP(=O)([O-])OCC[N+](C)(C)C)OC(=O)CCCCC/C=C\C/C=C\C/C=C\C/C=C\CCCCC	0.65345	1.03683
PC p34:1	OIICTMOQBYZCDA-IIKIFWEUSA-N	11125520	CCCCCCCCCCCCCCCC/C=C\OC[C@H](COP(=O)([O-])OCC[N+](C)(C)C)OC(=O)CCCCCCCCCCCCCCC	0.817596	0.981439
PC p34:2	KMNVIRCHUMQGHD-RCINKDPXSA-N	52923934	CCCCCCCCCCCCCCCC/C=C\OC[C@H](COP(=O)([O-])OCC[N+](C)(C)C)OC(=O)CCCCCCC/C=C\CCCCCC	0.0831469	0.890737
PC p34:3	QLEHHUPUHJPURI-PWYDUFMYSA-N	24779386	CCCCCCCCCCCCCC/C=C\OC[C@H](COP(=O)([O-])OCC[N+](C)(C)C)OC(=O)CCCCCCC/C=C\C/C=C\CCCCC	0.682928	0.961115
PC p36:3	SOUZQPFUXRVDGK-KCTKZSJBSA-N	53481701	CCCCCCCCCCCCCCCCOC[C@H](COP(=O)([O-])OCC[N+](C)(C)C)OC(=O)CCCCCC/C=C\C/C=C\C/C=C\C/C=C\CC	0.175834	0.916101
PC p36:4	IOYKZPNDXIIXLN-LOQSCQKMSA-N	24779388	CCCCCCCCCCCCCC/C=C\OC[C@H](COP(=O)([O-])OCC[N+](C)(C)C)OC(=O)CCC/C=C\C/C=C\C/C=C\C/C=C\CCCCC	0.285244	0.912817
PC p38:3	WOSDZWBQBJHAMR-NOQLVGMBSA-N	52925093	CCCCCCCCCCCCCCCC/C=C\OC[C@H](COP(=O)(O)OCCN)OC(=O)CCCCCCCCCCC/C=C\C/C=C\CCCCC	0.170634	0.854914
PC p38:4	BAKDTVUHENQVRW-IXXGCMLPSA-N	52925117	CCCCCCCCCCCCCCCCCC/C=C\OC[C@H](COP(=O)(O)OCCN)OC(=O)CCCCCC/C=C\C/C=C\C/C=C\CCCCC	0.995255	1.00059
PE 34:2	HBZNVZIRJWODIB-NHCUFCNUSA-N	46891780	CCCCCCCCCCCCCCCC(=O)OC[C@H](COP(=O)([O-])OCC[NH3+])OC(=O)CCCCCCC/C=C\C/C=C\CCCCC	0.850368	0.95179
PE 36:2	DXXUYBAISOHOLM-XRIXOMQFSA-N	52924894	CCCCCCCCCCCCCCCCCC(=O)O[C@H](COC(=O)CCCCCCC/C=C\C/C=C\CCCCC)COP(=O)(O)OCCN	0.000380012	0.69152
PE 36:3	GKAFCSRKMWFPSJ-RJXNKANHSA-N	71728379	CCCCCCCC/C=C\CCCCCCCC(=O)OC[C@H](COP(=O)([O-])OCC[NH3+])OC(=O)CCCCCCC/C=C\C/C=C\CCCCC	0.73538	0.978799
PE 36:4	DUQDVNACTOXOJA-KTKXOIIHSA-N	52924875	CCCCCCCCCCCCCCCC(=O)O[C@H](COC(=O)CCC/C=C\C/C=C\C/C=C\C/C=C\CCCCC)COP(=O)(O)OCCN	0.44991	0.904108
PE 38:2	CLPMAPXZURYSNH-CNBLIUODSA-N	9546825	CCCCCCCCCCCCCCCCCCCC(=O)OC[C@H](COP(=O)(O)OCCN)OC(=O)CCCCCCC/C=C\C/C=C\CCCCC	0.00516522	0.803061
PE 38:4	ANRKEHNWXKCXDB-BHFWLYLHSA-N	46891781	CCCCCCCCCCCCCCCCCC(=O)OC[C@H](COP(=O)([O-])OCC[NH3+])OC(=O)CCC/C=C\C/C=C\C/C=C\C/C=C\CCCCC	0.912796	0.974887
PE 38:6	LFGBKOUQHCWBQI-BZGLIJSBSA-N	52924893	CCCCC/C=C\C/C=C\CCCCCCCC(=O)OC[C@H](COP(=O)(O)OCCN)OC(=O)CCC/C=C\C/C=C\C/C=C\C/C=C\CCCCC	0.1639	0.8248
PE 40:6	FEABWDMFZNBFCT-KUVQHVNNSA-N	52924379	CCCCC/C=C\C/C=C\CCCCCCCC(=O)OC[C@H](COP(=O)(O)OCCN)OC(=O)CCCCC/C=C\C/C=C\C/C=C\C/C=C\CCCCC	0.216647	0.892963
Phosphatidylglycerol 29:0	RYHJACYQTJIGMZ-JHOUSYSJSA-N	52926457	CCCCCCCCCCCCCCCC(=O)OC[C@H](COP(=O)(O)OC[C@H](CO)O)OC(=O)CCCCCCCCCCCC	0.861125	1.00669
Plasmenyl-PC 34:2	IQACMFWAGALEAQ-WESJWMGVSA-N	6443157	CCCCCCCCCCCCCCCCOC[C@H](COP(=O)([O-])OCC[N+](C)(C)C)OC(=O)CCCCCCC/C=C\C/C=C\CCCCC	0.469004	1.0893
Plasmenyl-PC 36:6	JCIBOIAZHLGPOT-YAYDGDQKSA-N	70698851	CCCCCC/C=C\CCCCCCCC/C=C\O[C@H](COC(=O)CCCC/C=C\C/C=C\C/C=C\C/C=C\CC)COP(=O)([O-])OCC[N+](C)(C)C	0.560197	0.950018
Plasmenyl-PC 38:5	FHHVIBPVBBRLOR-IYACIECVSA-N	24779390	CCCCCCCCCCCCCCCC/C=C\OC[C@H](COP(=O)([O-])OCC[N+](C)(C)C)OC(=O)CCC/C=C\C/C=C\C/C=C\C/C=C\CCCCC	0.0568701	0.837974
Plasmenyl-PE 36:3	XVXISDREVDGQPX-PISDLAQISA-N	52925079	CCCCCCCCCCCCCCCC/C=C\OC[C@H](COP(=O)(O)OCCN)OC(=O)CCCCCCC/C=C\C/C=C\CCCCC	0.570073	0.939454
Plasmenyl-PE 36:5	UUYSKERSKRMYME-MAIXUNBTSA-N	52925126	CCCCCCCCCCCCCC/C=C\OC[C@H](COP(=O)(O)OCCN)OC(=O)CCC/C=C\C/C=C\C/C=C\C/C=C\CCCCC	0.926176	0.983596
Plasmenyl-PE 36:6	RLLOITCRNQRGJD-DFAKUSJGSA-N	52925061	CCCCCCCCCCCCCC/C=C\OC[C@H](COP(=O)(O)OCCN)OC(=O)CCC/C=C\C/C=C\C/C=C\C/C=C\C/C=C\CC	0.0966455	0.700975
Plasmenyl-PE 38:5	URPXXNCTXCOATD-FXMFQVEGSA-N	86289532	CCCCCCCCCCCCCCCC/C=C\OC[C@H](COP(=O)([O-])OCC[NH3+])OC(=O)CCC/C=C\C/C=C\C/C=C\C/C=C\CCCCC	0.973098	1.0068
Plasmenyl-PE 38:6	KCNBSSYOJRUKOM-JALPNNRCSA-N	52925089	CCCCCCCCCCCCCCCC/C=C\OC[C@H](COP(=O)(O)OCCN)OC(=O)CCC/C=C\C/C=C\C/C=C\C/C=C\C/C=C\CC	0.392306	1.10094
Plasmenyl-PE 38:7	WVGALBKSWOUIEZ-XNHMFJFDSA-N	5283497	CCCCCCCCCCCCCC/C=C\OC[C@H](COP(=O)(O)OCCN)OC(=O)CC/C=C\C/C=C\C/C=C\C/C=C\C/C=C\C/C=C\CC	0.995255	0.999161
Plasmenyl-PE 40:6	CVCZYWPCMUWTNS-IXKBFPPMSA-N	52925119	CCCCCCCCCCCCCCCCCC/C=C\OC[C@H](COP(=O)(O)OCCN)OC(=O)CCC/C=C\C/C=C\C/C=C\C/C=C\C/C=C\CC	0.393372	0.875785
Plasmenyl-PE 40:7	FIJFPUAJUDAZEY-MNDXXDKYSA-N	42607458	CCCCCCCCCCCCCCCC/C=C\OC[C@H](COP(=O)(O)OCCN)OC(=O)CC/C=C\C/C=C\C/C=C\C/C=C\C/C=C\C/C=C\CC	0.285244	0.884224
PS 38:3	BQBTWCBZEKRLFP-BGFRNLFWSA-N	52925523	CCCCCCCCCCCCCCCCCCCC(=O)O[C@H](COC(=O)CCCCCCC/C=C\C/C=C\C/C=C\CC)COP(=O)(O)OC[C@@H](C(=O)O)N	0.0568701	0.938175
PS 38:4	SVOUGFFDROZBJI-DNALCEECSA-N	24779545	CCCCCCCCCCCCCCCCCC(=O)OC[C@H](COP(=O)(O)OC[C@@H](C(=O)O)N)OC(=O)CCC/C=C\C/C=C\C/C=C\C/C=C\CCCCC	0.518723	0.987708
PS 40:3	BTIQFPURPAGQHS-HOSNKBABSA-N	52925502	CCCCCCCCCCCCCCCCCCCCCC(=O)O[C@H](COC(=O)CCCC/C=C\C/C=C\C/C=C\CCCCC)COP(=O)(O)OC[C@@H](C(=O)O)N	0.285244	0.924442
PS 40:4	GBBNRADSWUALEU-AEDAHVLISA-N	52925748	CCCCCCCCCCCCCCCCCCCC(=O)O[C@H](COC(=O)CCC/C=C\C/C=C\C/C=C\C/C=C\CCCCC)COP(=O)(O)OC[C@@H](C(=O)O)N	0.973098	0.99844
PS 40:6	LYYHRRPTEXPVOR-SYEOQEKUSA-N	24779546	CCCCCCCCCCCCCCCCCC(=O)OC[C@H](COP(=O)(O)OC[C@@H](C(=O)O)N)OC(=O)CC/C=C\C/C=C\C/C=C\C/C=C\C/C=C\C/C=C\CC	0.285244	0.944732
PS 42:5	VNQACVFLMLYTLE-WDLXSBMRSA-N	52925755	CCCCCCCCCC/C=C\CCCCCCCCCC(=O)O[C@H](COC(=O)CCC/C=C\C/C=C\C/C=C\C/C=C\CCCCC)COP(=O)(O)OC[C@@H](C(=O)O)N	0.0964702	0.873078
PS 42:6	WOBFEYJLJCLDBR-NISVGTQTSA-N	52925756	CCCCC/C=C\C/C=C\CCCCCCCCCCCC(=O)O[C@H](COC(=O)CCC/C=C\C/C=C\C/C=C\C/C=C\CCCCC)COP(=O)(O)OC[C@@H](C(=O)O)N	0.478197	0.946087
PS 42:8	ROCNHMAZFKRILY-PRDJOCNNSA-N	52925757	CCCCC/C=C\C/C=C\C/C=C\C/C=C\CCCCCC(=O)O[C@H](COC(=O)CCC/C=C\C/C=C\C/C=C\C/C=C\CCCCC)COP(=O)(O)OC[C@@H](C(=O)O)N	0.381665	0.924368
PS p34:0	OHPHIZCKAAJKOG-PBSRCHRYSA-N	52926194	CCCCCCCCCCCCCCCCCC(=O)O[C@H](CO/C=C\CCCCCCCCCCCCCC)COP(=O)(O)OC[C@@H](C(=O)O)N	0.728141	1.03222
SM 33:1	LQINJRUGTUOHGS-YPDYIYJKSA-N	52931139	CCCCCCCCCCCCCCC(=O)N[C@@H](COP(=O)([O-])OCC[N+](C)(C)C)[C@@H](/C=C/CCCCCCCCCCCCC)O	0.000484415	0.774256
SM 34:0	QHZIGNLCLJPLCU-QPPIDDCLSA-N	9939965	CCCCCCCCCCCCCCC[C@H]([C@H](COP(=O)([O-])OCC[N+](C)(C)C)NC(=O)CCCCCCCCCCCCCCC)O	0.850368	0.977276
SM d16:1/20:0	LKQLRGMMMAHREN-YJFXYUILSA-N	6453725	CCCCCCCCCCCCCCCCCC(=O)N[C@@H](COP(=O)([O-])OCC[N+](C)(C)C)[C@@H](/C=C/CCCCCCCCCCCCC)O	0.00516522	0.85368
SM d16:1/20:1	NBEADXWAAWCCDG-QDDWGVBQSA-N	6443882	CCCCCCCCCCCCC/C=C/[C@H]([C@H](COP(=O)([O-])OCC[N+](C)(C)C)NC(=O)CCCCCCC/C=C\CCCCCCCC)O	0.0196704	0.882164
SM d18:1/14:0	KYICBZWZQPCUMO-PSALXKTOSA-N	11433862	CCCCCCCCCCCCC/C=C/[C@H]([C@H](COP(=O)([O-])OCC[N+](C)(C)C)NC(=O)CCCCCCCCCCCCC)O	0.0120304	0.788302
SM d18:1/16:0	RWKUXQNLWDTSLO-GWQJGLRPSA-N	9939941	CCCCCCCCCCCCCCCC(=O)N[C@@H](COP(=O)([O-])OCC[N+](C)(C)C)[C@@H](/C=C/CCCCCCCCCCCCC)O	0.223529	0.96087
SM d18:1/16:1	YLWSJLLZUHSIEA-CKSUKHGVSA-N	52931235	CCCCCCCCCCCCCCCC(=O)N[C@@H](COP(=O)([O-])OCC[N+](C)(C)C)[C@@H](/C=C/CCCCCCCC/C=C\CCC)O	0.0366165	0.918915
SM d18:1/20:0	AADLTHQNYQJHQV-SVLGDMRNSA-N	44260124	CCCCCCCCCCCCCCCCCCCC(=O)N[C@@H](COP(=O)([O-])OCC[N+](C)(C)C)[C@@H](/C=C/CCCCCCCCCCCCC)O	0.0928895	0.901547
SM (d18:1/20:1)	MDRFMTLYKHBJTF-NQYLGBTJSA-N	52931179	CCCCCCCCCCCCC/C=C/[C@H]([C@H](COP(=O)([O-])OCC[N+](C)(C)C)NC(=O)CCCCCCCCC/C=C\CCCCCCCC)O	0.0153005	0.892686
SM d18:1/21:0	YXSZOBWVQJIWNE-QVDCKBILSA-N	52931193	CCCCCCCCCCCCCCCCCCCCC(=O)N[C@@H](COP(=O)([O-])OCC[N+](C)(C)C)[C@@H](/C=C/CCCCCCCCCCCCC)O	0.00375836	0.775027
SM d18:1/22:0	FJJANLYCZUNFSE-TWKUQIQBSA-N	44260125	CCCCCCCCCCCCCCCCCCCCCC(=O)N[C@@H](COP(=O)([O-])OCC[N+](C)(C)C)[C@@H](/C=C/CCCCCCCCCCCCC)O	0.850368	0.986552
SM d18:1/23:0	SXZWBNWTCVLZJN-NMIJJABPSA-N	46891684	CCCCCCCCCCCCCCCCCCCCCCC(=O)N[C@@H](COP(=O)([O-])OCC[N+](C)(C)C)[C@@H](/C=C/CCCCCCCCCCCCC)O	0.00516522	0.846447
SM d18:1/24:0	QEDPUVGSSDPBMD-XTAIVQBESA-N	44260127	CCCCCCCCCCCCCCCCCCCCCCCC(=O)N[C@@H](COP(=O)([O-])OCC[N+](C)(C)C)[C@@H](/C=C/CCCCCCCCCCCCC)O	0.877799	0.987196
SM d18:2/23:0	JBDGKEXQKCCQFK-JWQIMADESA-N	52931209	CCCCCCCCCCCCCCCCCCCCCCC(=O)N[C@@H](COP(=O)([O-])OCC[N+](C)(C)C)[C@@H](/C=C/CCCCCCCC/C=C\CCC)O	3.0271e-06	0.776136
SM d18:2/24:0	DACOGJMBYLZYDH-GXJPFUDISA-N	52931217	CCCCCCCCCCCCCCCCCCCCCCCC(=O)N[C@@H](COP(=O)([O-])OCC[N+](C)(C)C)[C@@H](/C=C/CCCCCCCC/C=C\CCC)O	0.221787	0.92569
SM (d18:2/24:1)	TXFLWJQVQCDUDZ-BRUGZULGSA-N	52931215	CCCCCCCC/C=C\CCCCCCCCCCCCCC(=O)N[C@@H](COP(=O)([O-])OCC[N+](C)(C)C)[C@@H](/C=C/CCCCCCCC/C=C\CCC)O	0.0948269	0.922201
TG 42:0	DUXYWXYOBMKGIN-UHFFFAOYSA-N	11148	CCCCCCCCCCCCCC(=O)OCC(COC(=O)CCCCCCCCCCCCC)OC(=O)CCCCCCCCCCCCC	0.866753	0.89568
TG 44:1	UZLGGKDLJGDGEY-WVSHCNQOSA-N	56936554	CCCCCCCCCCCCCC(=O)OC[C@H](COC(=O)CCCCCCC/C=C\CCCCCC)OC(=O)CCCCCCCCCCCCC	0.927592	0.946288
TG 46:0	JWVXCFSNEOMSHH-YACUFSJGSA-N	91865745	CCCCCCCCCCCCCCCC(=O)OC[C@@H](COC(=O)CCCCCCCCCCCCC)OC(=O)CCCCCCCCCCCCCCC	0.433823	0.764434
TG 46:1	RSDIQTNCDWUNDP-JHXSWNAYSA-N	56936558	CCCCCCCCCCCCCC(=O)OC[C@H](COC(=O)CCCCCCC/C=C\CCCCCCCC)OC(=O)CCCCCCCCCCCCC	0.73538	0.856029
TG 46:2	XUEMVUXNOCIHLG-MOFPORNTSA-N	56936582	CCCCCCCCCCCCCC(=O)OC[C@H](COC(=O)CCCCCCC/C=C\CCCCCC)OC(=O)CCCCCCC/C=C\CCCCCC	0.886552	1.07806
TG 46:3	AQARPXOEHQBBQN-OJJDTYCWSA-N	56936561	CCCCCCCCCCCCCC(=O)OC[C@H](COC(=O)CCCCCCC/C=C\C/C=C\C/C=C\CC)OC(=O)CCCCCCCCCCCCC	0.926176	1.04525
TG 48:0	PVNIQBQSYATKKL-UHFFFAOYSA-N	11147	CCCCCCCCCCCCCCCC(=O)OCC(COC(=O)CCCCCCCCCCCCCCC)OC(=O)CCCCCCCCCCCCCCC	0.314694	0.801903
TG 48:1	FEKLSEFRUGWUOS-DLOIZKPKSA-N	9543986	CCCCCCCCCCCCCCCC(=O)OC[C@H](COC(=O)CCCCCCC/C=C\CCCCCC)OC(=O)CCCCCCCCCCCCCCC	0.318108	0.788587
TG 48:2	RUOVJPPUXXFZPC-YZEIBMOJSA-N	9543987	CCCCCCCCCCCCCCCC(=O)OC[C@H](COC(=O)CCCCCCC/C=C\CCCCCC)OC(=O)CCCCCCC/C=C\CCCCCC	0.599844	0.850027
TG 48:3	SKGWNZXOCSYJQL-BUTYCLJRSA-N	9543989	CCCCCC/C=C\CCCCCCCC(=O)OCC(OC(=O)CCCCCCC/C=C\CCCCCC)COC(=O)CCCCCCC/C=C\CCCCCC	0.800464	1.11312
TG 49:0	TTWJTJMWHOYBPQ-ANFMRNGASA-N	9543988	CCCCCCCCCCCCCCCCC(=O)OC[C@@H](COC(=O)CCCCCCCCCCCCCCC)OC(=O)CCCCCCCCCCCCCCC	0.216983	0.722939
TG 49:1	VYYGQDOPVVYUKW-UKFBYESTSA-N	9543991	CCCCCCCCCCCCCCCC(=O)OC[C@H](COC(=O)CCCCCCC/C=C\CCCCCCC)OC(=O)CCCCCCCCCCCCCCC	0.0958949	0.642202
TG 49:2	QZYSUBAQYSVFNX-PSMULLBHSA-N	9543993	CCCCCCCCCCCCCCCCC(=O)OC[C@@H](COC(=O)CCCCCCC/C=C\CCCCCC)OC(=O)CCCCCCC/C=C\CCCCCC	0.0844717	0.683375
TG 50:0	QRJMBNGGFSPTQP-BXJPYAOGSA-N	3246958	[2H]C([2H])(C([2H])(C([2H])([2H])OC(=O)CCCCCCCCCCCCCCC)OC(=O)CCCCCCCCCCCCCCCCC)OC(=O)CCCCCCCCCCCCCCC	0.480248	0.791653
TG 50:1	YHMDGPZOSGBQRH-YYSBDVFPSA-N	25240460	CCCCCCCCCCCCCCCC(=O)OC[C@H](COC(=O)CCCCCCC/C=C\CCCCCCCC)OC(=O)CCCCCCCCCCCCCCC	0.432945	0.906405
TG 50:2	QEZWFCZNHWUARW-XQCAQTCHSA-N	9544010	CCCCCCCCCCCCCCCCCC(=O)OC[C@@H](COC(=O)CCCCCCC/C=C\CCCCCC)OC(=O)CCCCCCC/C=C\CCCCCC	0.644899	0.941102
TG 50:3	UFHNZOACKFBCOM-YXKNDSBASA-N	25240357	CCCCCCCC/C=C\CCCCCCCC(=O)OC[C@@H](COC(=O)CCCCCCC/C=C\CCCCCC)OC(=O)CCCCCCC/C=C\CCCCCC	0.995255	0.999261
TG 50:4	PVMBAGXWHHZKFP-JMPJWMFJSA-N	25240359	CCCCCC/C=C\CCCCCCCC(=O)OC[C@H](COC(=O)CCCCCCC/C=C\C/C=C\CCCCC)OC(=O)CCCCCCC/C=C\CCCCCC	0.877799	1.04962
TG 50:5	AFTBPUXZTDLRSP-UDQIKIEDSA-N	9544045	CCCCCC/C=C\CCCCCCCC(=O)OC[C@H](COC(=O)CCCCCCC/C=C\C/C=C\C/C=C\CC)OC(=O)CCCCCCC/C=C\CCCCCC	0.912796	1.04012
TG 51:1	OZAXLAGNPZMZAD-BOEMPQCLSA-N	9544006	CCCCCCCCCCCCCCCCC(=O)OC[C@H](COC(=O)CCCCCCC/C=C\CCCCCCC)OC(=O)CCCCCCCCCCCCCCCC	0.131726	0.670519
TG 51:2	NSNSZGBCOIKUBU-SZOKBDNISA-N	9544013	CCCCCCCCCCCCCCCCC(=O)OC[C@H](COC(=O)CCCCCCC/C=C\CCCCCCC)OC(=O)CCCCCCC/C=C\CCCCCCC	0.0950776	0.715316
TG 51:3	ISSGPXMQOMAFMJ-DMGKHJLRSA-N	9544023	CCCCCCC/C=C\CCCCCCCC(=O)OCC(OC(=O)CCCCCCC/C=C\CCCCCCC)COC(=O)CCCCCCC/C=C\CCCCCCC	0.285244	0.845864
TG 51:4	IIRQXNVLAXQEKB-KBEZCZBDSA-N	9544052	CCCCCCCC/C=C\CCCCCCCC(=O)OC[C@@H](COC(=O)CCCCCCC/C=C\CCCCCC)OC(=O)CCCCCCC/C=C\C/C=C\CCCC	0.654767	0.912815
TG 52:0	SDNYRTVJOFMYIW-OIVUAWODSA-N	545690	CCCCCCCCCCCCCCCCCC(=O)OC[C@@H](COC(=O)CCCCCCCCCCCCCCC)OC(=O)CCCCCCCCCCCCCCCCC	0.595521	0.834024
TG 52:1	NPCZZYKITFKRQZ-FQUZZJBASA-N	25240360	CCCCCCCCCCCCCCCCCC(=O)O[C@H](COC(=O)CCCCCCCCCCCCCCC)COC(=O)CCCCCCC/C=C\CCCCCCCC	0.595521	0.859711
TG 52:2	KGLAHZTWGPHKFF-RISKEULASA-N	25240361	CCCCCCCCCCCCCCCC(=O)OC[C@H](COC(=O)CCCCCCC/C=C\C/C=C\CCCCC)OC(=O)CCCCCCC/C=C\CCCCCCCC	0.975821	1.00221
TG 52:4	WHSWXEYWNPTUPW-HNJDVRDNSA-N	25240364	CCCCCCCC/C=C\CCCCCCCC(=O)O[C@H](COC(=O)CCCCCCC/C=C\CCCCCC)COC(=O)CCCCCCC/C=C\C/C=C\CCCCC	0.168631	1.18245
TG 52:5	CQZAAIKPSLHIBC-KDJOUNIJSA-N	25240366	CCCCCC/C=C\CCCCCCCC(=O)OC[C@H](COC(=O)CCCCCCC/C=C\C/C=C\CCCCC)OC(=O)CCCCCCC/C=C\C/C=C\CCCCC	0.518723	1.15588
TG 53:0	ZJUXHXMIKPSINE-IONAWPRUSA-N	9544181	CCCCCCCCCCCCCCCCCCCCC(=O)OC[C@@H](COC(=O)CCCCCCCCCCCCCCC)OC(=O)CCCCCCCCCCCCCCC	0.560197	0.879729
TG 53:1	WWJIBIGWKGFVAQ-JNSYTQKUSA-N	9544081	CCCCCCCCCCCCCCCCCC(=O)OC[C@@H](COC(=O)CCCCCCC/C=C\CCCCCCC)OC(=O)CCCCCCCCCCCCCCCCC	0.453711	0.781242
TG 53:2	RSINITWKVQRWSZ-RFVLVDBCSA-N	9544102	CCCCCCCCCCCCCCCCCC(=O)OC[C@@H](COC(=O)CCCCCCC/C=C\C/C=C\CCCC)OC(=O)CCCCCCCCCCCCCCCCC	0.0928895	0.705594
TG 53:3	ZNQBEJJYVJSZLM-LEDQTTRKSA-N	9544126	CCCCCCCC/C=C\CCCCCCCC(=O)OC[C@@H](COC(=O)CCCCCCC/C=C\CCCCCCC)OC(=O)CCCCCCC/C=C\CCCCCCCC	0.510795	0.88742
TG 53:4	BMSDHYZLQWTKSQ-LSJAAEOESA-N	9544152	CCCCCCCC/C=C\CCCCCCCC(=O)OC[C@@H](COC(=O)CCCCCCC/C=C\C/C=C\CCCC)OC(=O)CCCCCCC/C=C\CCCCCCCC	0.936834	0.984842
TG 53:5	QHYAATSKYBYSLG-BXDFBOBBSA-N	9544183	CCCCCCC/C=C\CCCCCCCC(=O)OC[C@H](COC(=O)CCCCCCC/C=C\C/C=C\CCCCC)OC(=O)CCCCCCC/C=C\C/C=C\CCCCC	0.285244	1.24907
TG 54:0	DCXXMTOCNZCJGO-UHFFFAOYSA-N	11146	CCCCCCCCCCCCCCCCCC(=O)OCC(COC(=O)CCCCCCCCCCCCCCCCC)OC(=O)CCCCCCCCCCCCCCCCC	0.975821	1.0084
TG 54:1	YFFIQXNTTVSKJC-NZEOUKRFSA-N	16058371	CCCCCCCCCCCCCCCCCC(=O)OC[C@H](COC(=O)CCCCCCC/C=C\CCCCCCCC)OC(=O)CCCCCCCCCCCCCCCCC	0.737538	0.886745
TG 54:2	RYNHWWNZNIGDAQ-BMTCQUSZSA-N	16058372	CCCCCCCCCCCCCCCCCC(=O)OC[C@H](COC(=O)CCCCCCC/C=C\CCCCCCCC)OC(=O)CCCCCCC/C=C\CCCCCCCC	0.912796	0.966395
TG 54:3	PHYFQTYBJUILEZ-IUPFWZBJSA-N	5497163	CCCCCCCC/C=C\CCCCCCCC(=O)OCC(OC(=O)CCCCCCC/C=C\CCCCCCCC)COC(=O)CCCCCCC/C=C\CCCCCCCC	0.216983	1.14116
TG 54:4	BRLGHZXETDWABO-NOFIOOQLSA-N	9544255	CCCCCCCCCCCCCCCCCC(=O)OC[C@H](COC(=O)CCCCCCC/C=C\C/C=C\C/C=C\CC)OC(=O)CCCCCCC/C=C\CCCCCCCC	0.0349571	1.28701
TG 54:5	VVEBTVMJPTZDHO-YQFZQLSNSA-N	25240373	CCCCCCCC/C=C\CCCCCCCC(=O)OC[C@H](COC(=O)CCCCCCC/C=C\C/C=C\CCCCC)OC(=O)CCCCCCC/C=C\C/C=C\CCCCC	0.318108	1.15774
TG 54:6	HBOQXIRUPVQLKX-BBWANDEASA-N	5322095	CCCCC/C=C\C/C=C\CCCCCCCC(=O)OCC(OC(=O)CCCCCCC/C=C\C/C=C\CCCCC)COC(=O)CCCCCCC/C=C\C/C=C\CCCCC	0.094421	1.48504
TG 54:8	BMPVTDWOWBNPJU-NYRSPQLFSA-N	9544413	CCCCC/C=C\C/C=C\C/C=C\C/C=C\CCCC(=O)OC[C@@H](COC(=O)CCCCCCC/C=C\C/C=C\CCCC)OC(=O)CCCCCCC/C=C\C/C=C\CCCC	0.886552	1.04928
TG 56:1	OCYFAHIHWCVZKS-FHSLLVMSSA-N	9544345	CCCCCCCCCCCCCCCCCCCC(=O)OC[C@@H](COC(=O)CCCCCCCCCCCCCCCCC)OC(=O)CCCCCCC/C=C\CCCCCCCC	0.73538	1.11816
TG 56:2	PDEQUPGHMOMBFC-FYEHETCMSA-N	9544390	CCCCCCCCCCCCCCCCCCCC(=O)OC[C@@H](COC(=O)CCCCCCCCCCCCCCCCC)OC(=O)CCCCCCC/C=C\C/C=C\CCCCC	0.711121	1.12663
TG 56:3	QXMHHXQBBKDSSL-BAQZNRHJSA-N	9544447	CCCCCCCC/C=C\CCCCCCCCCC(=O)OC[C@@H](COC(=O)CCCCCCC/C=C\CCCCCCCC)OC(=O)CCCCCCC/C=C\CCCCCCCC	0.552353	1.15328
TG 56:4	YONCDTJKIZDSKQ-IYASBODOSA-N	25240379	CCCCCCCC/C=C\CCCCCCCCCC(=O)OC[C@@H](COC(=O)CCCCCCC/C=C\CCCCCCCC)OC(=O)CCCCCCC/C=C\C/C=C\CCCCC	0.131726	1.32204
TG 56:5	UHEJWASONFIROS-YPSHDQQVSA-N	25240380	CCCCCCCC/C=C\CCCCCCCCCC(=O)OC[C@@H](COC(=O)CCCCCCC/C=C\C/C=C\CCCCC)OC(=O)CCCCCCC/C=C\C/C=C\CCCCC	0.926176	0.976652
TG 56:6	ZTNDRFCABXFVMY-WJTCTALZSA-N	9544625	CCCCC/C=C\C/C=C\CCCCCCCCCC(=O)OC[C@@H](COC(=O)CCCCCCC/C=C\C/C=C\CCCCC)OC(=O)CCCCCCC/C=C\C/C=C\CCCCC	0.377853	0.8869
TG 56:7	DODZUDCYRVWEOJ-GKZBLMSTSA-N	9544695	CCCCC/C=C\C/C=C\CCCCCCCC(=O)OC[C@H](COC(=O)CCCCCC/C=C\C/C=C\C/C=C\CCCCC)OC(=O)CCCCCCC/C=C\C/C=C\CCCCC	0.592466	0.915804
TG 56:8	UBGUHMDKBGQUND-VPFWBQFRSA-N	9544762	CCCCCCCCCCCCCCCC(=O)OC[C@H](COC(=O)CCC/C=C\C/C=C\C/C=C\C/C=C\CCCCC)OC(=O)CCC/C=C\C/C=C\C/C=C\C/C=C\CCCCC	0.579053	1.14049
TG 58:1	OWZMHFAFGQCCNI-FBXRAONGSA-N	25240381	CCCCCCCCCCCCCCCCCCCC(=O)OC[C@@H](COC(=O)CCCCCCC/C=C\CCCCCCCC)OC(=O)CCCCCCCCCCCCCCCCCCC	0.599844	1.1295
TG 58:2	GXWBCAVCOMAOHT-VMCJOIRWSA-N	9545277	CCCCC/C=C\C/C=C\CCCCCCCC(=O)OC[C@H](COC(=O)CCC/C=C\C/C=C\C/C=C\C/C=C\CCCCC)OC(=O)CCC/C=C\C/C=C\C/C=C\C/C=C\CCCCC	0.216983	1.3021
TG 58:3	RFMSTHTUAZETPD-JJPHLYBUSA-N	9544748	CCCCCCCC/C=C\CCCCCCCCCC(=O)OC[C@@H](COC(=O)CCCCCCC/C=C\CCCCCCCC)OC(=O)CCCCCCCCC/C=C\CCCCCCCC	0.131726	1.41497
TG 58:4	CCKRHDUCFMOBKX-AAINFQTBSA-N	9544835	CCCCCCCCCCCCCCCCCCCC(=O)O[C@H](COC(=O)CCCCCCCCCCCCCCCCC)COC(=O)CCC/C=C\C/C=C\C/C=C\C/C=C\CCCCC	0.160805	1.35396
TG 58:6	GSNFRUMSEHHPSY-LCXCSEBNSA-N	9544977	CCCCCCCC/C=C\CCCCCCCCCC(=O)O[C@H](COC(=O)CCCCCCC/C=C\CCCCCCCC)COC(=O)CCC/C=C\C/C=C\C/C=C\C/C=C\CCCCC	0.285244	0.822734
TG 58:8	KWIGMCRWEINBIR-HUPVKWKYSA-N	9545124	CCCCCCCCCCCCCCCCCC(=O)OC[C@H](COC(=O)CCC/C=C\C/C=C\C/C=C\C/C=C\CCCCC)OC(=O)CCC/C=C\C/C=C\C/C=C\C/C=C\CCCCC	0.807554	0.944915
TG 58:9	RVXFSLZMZOFGEQ-SWIIBWKZSA-N	9545200	CCCCCCCC/C=C\CCCCCCCC(=O)OC[C@H](COC(=O)CCC/C=C\C/C=C\C/C=C\C/C=C\CCCCC)OC(=O)CCC/C=C\C/C=C\C/C=C\C/C=C\CCCCC	0.973098	1.009
TG 60:1	YNDXXWKSWMKVGO-HZLQDPIMSA-N	9544965	CCCCCCCCCCCCCCCCCCCC(=O)OC[C@H](COC(=O)CCCCCCCCC/C=C\CCCCCCCC)OC(=O)CCCCCCCCCCCCCCCCCCC	0.311159	1.23719
TG 60:11	ASSZWZBQIXMMKM-SYTPEAHJSA-N	9545730	CCCCC/C=C\C/C=C\C/C=C\CCCCCCC(=O)OC[C@H](COC(=O)CCC/C=C\C/C=C\C/C=C\C/C=C\CCCCC)OC(=O)CCC/C=C\C/C=C\C/C=C\C/C=C\CCCCC	0.285244	0.825574
TG 60:2	QPNVLDQSHXVPMG-JMYPUKFOSA-N	9545040	CCCCCCCCCCCCCCCCCCCC(=O)OC[C@H](COC(=O)CCCCCCCCC/C=C\CCCCCCCC)OC(=O)CCCCCCCCC/C=C\CCCCCCCC	0.20479	1.29787
TG 62:1	TZLOSVAFXBPUQT-VBMMIZSXSA-N	9545526	CCCCCCCCCCCCCCCCCCCCCC(=O)OC[C@H](COC(=O)CCCCCCCCCCCCCCCCCCC)OC(=O)CCCCCCCCC/C=C\CCCCCCCC	0.850368	1.05039

## Sheet: Table S5
S5. Lipidome differential abundance analysis: Cluster IV vs III at Visit -3
Compound Name	InChiKeys	Pubchem ID	SMILES	pvalue	foldchange
CE 18:1	RJECHNNFRHZQKU-RMUVNZEASA-N	5283632	CCCCCCCC/C=C\CCCCCCCC(=O)O[C@H]1CC[C@@]2([C@H]3CC[C@]4([C@H]([C@@H]3CC=C2C1)CC[C@@H]4[C@H](C)CCCC(C)C)C)C	0.831464	1.02648
CE 18:2	NAACPBBQTFFYQB-LJAITQKLSA-N	5287939	CCCCC/C=C\C/C=C\CCCCCCCC(=O)O[C@H]1CC[C@@]2([C@H]3CC[C@]4([C@H]([C@@H]3CC=C2C1)CC[C@@H]4[C@H](C)CCCC(C)C)C)C	0.533761	1.06928
CE 18:3	FYMCIBHUFSIWCE-WVXFKAQASA-N	6436907	CC/C=C\C/C=C\C/C=C\CCCCCCCC(=O)O[C@H]1CC[C@@]2([C@H]3CC[C@]4([C@H]([C@@H]3CC=C2C1)CC[C@@H]4[C@H](C)CCCC(C)C)C)C	0.228606	1.18306
CE 20:4	IMXSFYNMSOULQS-BEDFLICRSA-N	6479222	CCCCC/C=C\C/C=C\C/C=C\C/C=C\CCCC(=O)O[C@H]1CC[C@@]2([C@H]3CC[C@]4([C@H]([C@@H]3CC=C2C1)CC[C@@H]4[C@H](C)CCCC(C)C)C)C	0.104064	1.17465
CE 22:6	VOEVEGPMRIYYKC-HNJOWPRISA-N	14274978	CC/C=C\C/C=C\C/C=C\C/C=C\C/C=C\C/C=C\CCC(=O)O[C@H]1CC[C@@]2([C@H]3CC[C@]4([C@H]([C@@H]3CC=C2C1)CC[C@@H]4[C@H](C)CCCC(C)C)C)C	7.77334e-06	0.501577
Ceramide d18:1/23:0	NAJHAHQNQCNWOP-PUYNVXOJSA-N	52931115	CCCCCCCCCCCCCCCCCCCCCCC(=O)N[C@@H](CO)[C@@H](/C=C/CCCCCCCCCCCCC)O	0.000357678	1.32599
Ceramide d40:1	KEPQASGDXIEOIL-GLQCRSEXSA-N	5283567	CCCCCCCCCCCCCCCCCCCCCC(=O)N[C@@H](CO)[C@@H](/C=C/CCCCCCCCCCCCC)O	0.783725	1.02097
Ceramide d42:1	ZJVVOYPTFQEGPH-AUTSUKAISA-N	5283571	CCCCCCCCCCCCCCCCCCCCCCCC(=O)N[C@@H](CO)[C@@H](/C=C/CCCCCCCCCCCCC)O	0.681479	1.02561
Ceramide d42:2	VJSBNBBOSZJDKB-KPEYJIHVSA-N	5283568	CCCCCCCCCCCCC/C=C/[C@H]([C@H](CO)NC(=O)CCCCCCCCCCCCC/C=C\CCCCCCCC)O	2.66851e-05	0.631829
Cer (d18:1/16:0)	YDNKGFDKKRUKPY-TURZORIXSA-N	5283564	CCCCCCCCCCCCCCCC(=O)N[C@@H](CO)[C@@H](/C=C/CCCCCCCCCCCCC)O	0.370016	0.93716
Cholesterol	HVYWMOMLDIMFJA-DPAQBDIFSA-N	5997	C[C@H](CCCC(C)C)[C@H]1CC[C@@H]2[C@@]1(CC[C@H]3[C@H]2CC=C4[C@@]3(CC[C@@H](C4)O)C)C	0.509958	1.01161
DG 32:0	JEJLGIQLPYYGEE-XIFFEERXSA-N	644078	CCCCCCCCCCCCCCCC(=O)OC[C@H](CO)OC(=O)CCCCCCCCCCCCCCC	0.163914	0.848311
DG 34:0	VYQDALBEQRZDPL-DHUJRADRSA-N	3246945	CCCCCCCCCCCCCCCCCC(=O)OC[C@H](CO)OC(=O)CCCCCCCCCCCCCCC	0.256573	0.896176
DG 34:1	YEJYLHKQOBOSCP-OZKTZCCCSA-N	5282283	CCCCCCCCCCCCCCCC(=O)OC[C@H](CO)OC(=O)CCCCCCC/C=C\CCCCCCCC	0.0157755	0.73269
DG 36:0	UHUSDOQQWJGJQS-UHFFFAOYSA-N	102615	CCCCCCCCCCCCCCCCCC(=O)OCC(CO)OC(=O)CCCCCCCCCCCCCCCCC	0.486742	0.954292
DG 36:2	AFSHUZFNMVJNKX-LLWMBOQKSA-N	9543716	CCCCCCCC/C=C\CCCCCCCC(=O)OC[C@H](CO)OC(=O)CCCCCCC/C=C\CCCCCCCC	0.0314622	0.749353
DG 36:3	BLZVZPYMHLXLHG-JOBMVARSSA-N	9543722	CCCCCCCC/C=C\CCCCCCCC(=O)OC[C@H](CO)OC(=O)CCCCCCC/C=C\C/C=C\CCCCC	0.243923	0.85734
DG 38:5	GRGDLDNREYVILP-CNWVQWJYSA-N	9543784	CCCCC/C=C\C/C=C\CCCCCCCCCC(=O)O[C@@H](CO)COC(=O)CCCCCCC/C=C\C/C=C\C/C=C\CC	0.406927	0.903359
DG 38:6	YDVDXUYJFQLPEG-CTHJWPIASA-N	9543795	CCCCC/C=C\C/C=C\C/C=C\CCCCCCC(=O)O[C@@H](CO)COC(=O)CCCCCCC/C=C\C/C=C\C/C=C\CC	0.699355	1.12327
DG 40:1	VFUWCRMMTRWZAT-JLDYGAOKSA-N	9543793	CCCCCCCCCCCCCCCCCCCC(=O)OC[C@H](CO)OC(=O)CCCCCCCCC/C=C\CCCCCCCC	0.847776	1.01998
FA 16:0	IPCSVZSSVZVIGE-UHFFFAOYSA-N	985	CCCCCCCCCCCCCCCC(=O)O	0.253118	0.894245
FA 16:1	SECPZKHBENQXJG-FPLPWBNLSA-N	445638	CCCCCC/C=C\CCCCCCCC(=O)O	0.109729	0.633234
FA 18:0	QIQXTHQIDYTFRH-UHFFFAOYSA-N	5281	CCCCCCCCCCCCCCCCCC(=O)O	0.670394	0.945948
FA 18:1	ZQPPMHVWECSIRJ-KTKRTIGZSA-N	445639	CCCCCCCC/C=C\CCCCCCCC(=O)O	0.0647634	0.703627
FA 22:4	TWSWSIQAPQLDBP-DOFZRALJSA-N	5497181	CCCCC/C=C\C/C=C\C/C=C\C/C=C\CCCCCC(=O)O	0.509099	0.930506
GlcCer d18:1/22:0	YIGARKIIFOHVPF-YAEABVQUSA-N	6321359	CCCCCCCCCCCCCCCCCCCCCC(=O)N[C@@H](CO[C@H]1C(C([C@@H]([C@H](O1)CO)O)O)O)[C@@H](/C=C/CCCCCCCCCCCCC)O	0.00111602	0.783857
GlcCer d18:1/24:0	POQRWMRXUOPCLD-AAAFHMTMSA-N	6321361	CCCCCCCCCCCCCCCCCCCCCCCC(=O)N[C@@H](CO[C@H]1C(C([C@@H]([C@H](O1)CO)O)O)O)[C@@H](/C=C/CCCCCCCCCCCCC)O	0.00154472	0.801763
GlcCer d18:1/24:1	WBOZIXHPUPAOIA-RBELZSLISA-N	6321360	CCCCCCCCCCCCC/C=C/[C@H]([C@H](CO[C@H]1C(C([C@@H]([C@H](O1)CO)O)O)O)NC(=O)CCCCCCCCCCCCC/C=C\CCCCCCCC)O	7.92038e-06	0.635673
LPC 18:0	IHNKQIMGVNPMTC-RUZDIDTESA-N	497299	CCCCCCCCCCCCCCCCCC(=O)OC[C@H](COP(=O)([O-])OCC[N+](C)(C)C)O	0.10824	0.84704
LPC 18:1	YAMUFBLWGFFICM-PTGWMXDISA-N	16081932	CCCCCCCC/C=C\CCCCCCCC(=O)OC[C@H](COP(=O)([O-])OCC[N+](C)(C)C)O	0.00813146	0.794522
LPC 18:2	SPJFYYJXNPEZDW-FTJOPAKQSA-N	11005824	CCCCC/C=C\C/C=C\CCCCCCCC(=O)OC[C@H](COP(=O)([O-])OCC[N+](C)(C)C)O	0.0234002	0.781269
LPC 20:0	UATOAILWGVYRQS-HHHXNRCGSA-N	24779473	CCCCCCCCCCCCCCCCCCCC(=O)OC[C@H](COP(=O)([O-])OCC[N+](C)(C)C)O	0.000181499	0.708909
LPC 20:1	GJTDRNFWIDPARY-GTPZACKGSA-N	24779475	CCCCCCCCCC/C=C\CCCCCCCC(=O)OC[C@H](COP(=O)([O-])OCC[N+](C)(C)C)O	8.61407e-05	0.598274
LPC 20:2	YYQVCMMXPIJVHY-ZOIJLGJPSA-N	52924053	CCCCC/C=C\C/C=C\CCCCCCCCCC(=O)OC[C@H](COP(=O)([O-])OCC[N+](C)(C)C)O	0.0147892	0.78019
LPE 18:0	BBYWOYAFBUOUFP-JOCHJYFZSA-N	46891690	CCCCCCCCCCCCCCCCCC(=O)OC[C@H](COP(=O)([O-])OCC[NH3+])O	0.783725	1.03385
LPE 18:2	DBHKHNGBVGWQJE-USWSLJGRSA-N	52925130	CCCCC/C=C\C/C=C\CCCCCCCC(=O)OC[C@H](COP(=O)(O)OCCN)O	0.228606	0.863925
LPE 20:0	HEQMDGOBDIGJOC-XMMPIXPASA-N	52925131	CCCCCCCCCCCCCCCCCCCC(=O)OC[C@H](COP(=O)(O)OCCN)O	0.319579	1.022
LPE 20:1	JEAGLCKGAKACCE-OPSAWKISSA-N	52925139	CCCCCCCC/C=C\CCCCCCCCCC(=O)OC[C@H](COP(=O)(O)OCCN)O	0.00589555	0.778606
PC 16:0/16:0	KILNVBDSWZSGLL-KXQOOQHDSA-N	452110	CCCCCCCCCCCCCCCC(=O)OC[C@H](COP(=O)([O-])OCC[N+](C)(C)C)OC(=O)CCCCCCCCCCCCCCC	0.00130316	0.870805
PC 18:1/16:0	WTJKGGKOPKCXLL-VYOBOKEXSA-N	5497103	CCCCCCCCCCCCCCCC(=O)OC[C@H](COP(=O)([O-])OCC[N+](C)(C)C)OC(=O)CCCCCCC/C=C\CCCCCCCC	0.746083	0.988789
PC 28:0	CITHEXJVPOWHKC-UUWRZZSWSA-N	5459377	CCCCCCCCCCCCCC(=O)OC[C@H](COP(=O)([O-])OCC[N+](C)(C)C)OC(=O)CCCCCCCCCCCCC	0.949711	1.01846
PC 30:0	RFVFQQWKPSOBED-PSXMRANNSA-N	129657	CCCCCCCCCCCCCCCC(=O)O[C@H](COC(=O)CCCCCCCCCCCCC)COP(=O)([O-])OCC[N+](C)(C)C	0.100609	1.16723
PC 32:1	QIBZFHLFHCIUOT-NPBIGWJUSA-N	6443788	CCCCCCCCCCCCCCCC(=O)OC[C@H](COP(=O)([O-])OCC[N+](C)(C)C)OC(=O)CCCCCCC/C=C\CCCCCC	0.0274562	1.22078
PC 32:2	GPWHCUUIQMGELX-VHQDNGOZSA-N	24778764	CCCCCC/C=C\CCCCCCCC(=O)OC[C@H](COP(=O)([O-])OCC[N+](C)(C)C)OC(=O)CCCCCCC/C=C\CCCCCC	0.0100774	1.34312
PC 32:3	UXEFXNOSLOCOLX-ZCHSEWAGSA-N	52922763	CCCCCCCCCCCCCC(=O)O[C@H](COC(=O)CCCC/C=C\C/C=C\C/C=C\CCCCC)COP(=O)([O-])OCC[N+](C)(C)C	0.325127	1.10544
PC 33:1	GXTATYLPYLLNLV-MGIDVFSBSA-N	24778662	CCCCCCCCCCCCCCC(=O)OC[C@H](COP(=O)([O-])OCC[N+](C)(C)C)OC(=O)CCCCCCCCC/C=C\CCCCCC	1.12523e-06	1.65101
PC 34:0	PZNPLUBHRSSFHT-RRHRGVEJSA-N	24778686	CCCCCCCCCCCCCCCCCC(=O)O[C@H](COC(=O)CCCCCCCCCCCCCCC)COP(=O)([O-])OCC[N+](C)(C)C	0.000671373	0.800189
PC 34:2	JLPULHDHAOZNQI-ZTIMHPMXSA-N	5287971	CCCCCCCCCCCCCCCC(=O)OC[C@H](COP(=O)([O-])OCC[N+](C)(C)C)OC(=O)CCCCCCC/C=C\C/C=C\CCCCC	0.949711	0.997627
PC 34:3	CNNSEHUKQJCGTE-UPPWDXJYSA-N	24778699	CCCCCCCCCCCCCCCC(=O)OC[C@H](COP(=O)([O-])OCC[N+](C)(C)C)OC(=O)CCCC/C=C\C/C=C\C/C=C\CCCCC	0.442292	1.08821
PC 35:2	ZSKWZJYUVZYDQU-WESJWMGVSA-N	52922491	CCCCCCCCCCCCCCCCC(=O)OC[C@H](COP(=O)([O-])OCC[N+](C)(C)C)OC(=O)CCCCCCC/C=C\C/C=C\CCCCC	2.73634e-05	1.35639
PC 36:0	NRJAVPSFFCBXDT-HUESYALOSA-N	94190	CCCCCCCCCCCCCCCCCC(=O)OC[C@H](COP(=O)([O-])OCC[N+](C)(C)C)OC(=O)CCCCCCCCCCCCCCCCC	0.00813146	1.22172
PC 36:1	ATHVAWFAEPLPPQ-VRDBWYNSSA-N	24778825	CCCCCCCCCCCCCCCCCC(=O)OC[C@H](COP(=O)([O-])OCC[N+](C)(C)C)OC(=O)CCCCCCC/C=C\CCCCCCCC	0.573618	0.962795
PC 36:2	SNKAWJBJQDLSFF-NVKMUCNASA-N	10350317	CCCCCCCC/C=C\CCCCCCCC(=O)OC[C@H](COP(=O)([O-])OCC[N+](C)(C)C)OC(=O)CCCCCCC/C=C\CCCCCCCC	0.183721	0.965524
PC 36:3	BXRLDROZWDUSGM-ZRYFCQOPSA-N	24778937	CCCCCCCC/C=C\CCCCCCCC(=O)OC[C@H](COP(=O)([O-])OCC[N+](C)(C)C)OC(=O)CCCC/C=C\C/C=C\CCCCCCCC	0.228606	1.09546
PC 36:4	IIZPXYDJLKNOIY-JXPKJXOSSA-N	10747814	CCCCCCCCCCCCCCCC(=O)OC[C@H](COP(=O)([O-])OCC[N+](C)(C)C)OC(=O)CCC/C=C\C/C=C\C/C=C\C/C=C\CCCCC	0.240608	1.03982
PC 36:5	DYDDZDMJSQYFGN-OIVUZXIWSA-N	24778771	CCCCCC/C=C\CCCCCCCC(=O)OC[C@H](COP(=O)([O-])OCC[N+](C)(C)C)OC(=O)CCC/C=C\C/C=C\C/C=C\C/C=C\CCCCC	0.155977	0.969698
PC 36:6	SPWBDEZMKCRQSX-NGPPOSSDSA-N	52922847	CCCCC/C=C\C/C=C\C/C=C\CCCCC(=O)O[C@H](COC(=O)CCCCCCC/C=C\C/C=C\C/C=C\CC)COP(=O)([O-])OCC[N+](C)(C)C	0.509099	0.911076
PC 37:2	MCZUABDVGPPWPM-HJTCUGKVSA-N	52922735	CCCCCCCCCCCCCCCCCCC(=O)O[C@H](COC(=O)CCCCCCC/C=C\C/C=C\CCCCC)COP(=O)([O-])OCC[N+](C)(C)C	0.418668	1.06408
PC 37:3	OOYQEEUUQRMQKL-JUUDQZDJSA-N	52922851	CCCCCCCCCCCCCCCCCCC(=O)O[C@H](COC(=O)CCCCCCC/C=C\C/C=C\C/C=C\CC)COP(=O)([O-])OCC[N+](C)(C)C	2.73634e-05	1.71963
PC 37:4	QRPUCJXFPYFTMB-FBFLODOBSA-N	52922853	CCCCCCCCC/C=C\CCCCCCCC(=O)O[C@H](COC(=O)CCCCCCC/C=C\C/C=C\C/C=C\CC)COP(=O)([O-])OCC[N+](C)(C)C	0.000100507	1.34916
PC 38:2	KXXLFCAPKGRXBT-FMJYHZMHSA-N	24779263	CCCCCCCCCCCCCCCCCCCC(=O)OC[C@H](COP(=O)([O-])OCC[N+](C)(C)C)OC(=O)CCCCCCC/C=C\C/C=C\CCCCC	0.180249	0.917535
PC 38:3	OJHJKEBRZSDTTL-VHWCKNCUSA-N	52922741	CCCCCCCC/C=C\CCCCCCCCCC(=O)O[C@H](COC(=O)CCCCCCC/C=C\C/C=C\CCCCC)COP(=O)([O-])OCC[N+](C)(C)C	0.0133035	1.55524
PC 38:4	DNYKSJQVBCVGOF-LCKGXUDJSA-N	52923291	CCCCCCCCCCCCCCCCCC(=O)O[C@H](COC(=O)CCC/C=C\C/C=C\C/C=C\C/C=C\CCCCC)COP(=O)([O-])OCC[N+](C)(C)C	0.913467	0.992005
PC 38:5	YLWBKBDNHWQEFU-YJXJLLHLSA-N	53479033	CCCCCC/C=C\CCCCCCCCCC(=O)O[C@H](COC(=O)CCC/C=C\C/C=C\C/C=C\C/C=C\CCCCC)COP(=O)([O-])OCC[N+](C)(C)C	0.494881	1.11308
PC 38:6	PLZBTDKJYHXIEW-DZUXOTHRSA-N	52923295	CCCCC/C=C\C/C=C\CCCCCCCC(=O)O[C@H](COC(=O)CCC/C=C\C/C=C\C/C=C\C/C=C\CCCCC)COP(=O)([O-])OCC[N+](C)(C)C	7.34808e-09	0.636537
PC 38:8	QQNHCRBGLPDWEW-LRFGEVPTSA-N	52922865	CC/C=C\C/C=C\C/C=C\CCCCCCCC(=O)OC[C@H](COP(=O)([O-])OCC[N+](C)(C)C)OC(=O)CCC/C=C\C/C=C\C/C=C\C/C=C\C/C=C\CC	0.965278	0.980901
PC 40:2	AEUCYCQYAUFAKH-DITNKEBASA-N	24779063	CCCCCCCC/C=C\CCCCCCCCCC(=O)OC[C@H](COP(=O)([O-])OCC[N+](C)(C)C)OC(=O)CCCCCCCCC/C=C\CCCCCCCC	0.0629253	0.844326
PC 40:5	LJFKFKIYUJNFPZ-ZLFSCUDPSA-N	52923133	CCCCCCCC/C=C\CCCCCCCCCC(=O)OC[C@H](COP(=O)([O-])OCC[N+](C)(C)C)OC(=O)CCC/C=C\C/C=C\C/C=C\C/C=C\CCCCC	6.19132e-08	0.524834
PC 40:6	TYRTWVKQVGNGSZ-RGBTVBCDSA-N	52923195	CCCCC/C=C\C/C=C\CCCCCCCCCC(=O)OC[C@H](COP(=O)([O-])OCC[N+](C)(C)C)OC(=O)CCC/C=C\C/C=C\C/C=C\C/C=C\CCCCC	0.00518999	0.783386
PC 40:7	BPUROMFCPFGBOT-ZEGPSQTJSA-N	24778982	CCCCC/C=C\C/C=C\CCCCCCCC(=O)OC[C@H](COP(=O)([O-])OCC[N+](C)(C)C)OC(=O)CC/C=C\C/C=C\C/C=C\C/C=C\C/C=C\CCCCC	0.00294074	0.740885
PC 42:1	PAHPUCKPYBHMBM-RURDTVAGSA-N	24778881	CCCCCCCCCCCCCCCCCC(=O)OC[C@H](COP(=O)([O-])OCC[N+](C)(C)C)OC(=O)CCCCCCCCCCCCC/C=C\CCCCCCCC	0.0679279	0.859261
PC 42:4	SGYNBRXEOXADHS-CIUHTZMDSA-N	24779052	CCCCCCCCCCCCCCCCCCCC(=O)OC[C@H](COP(=O)([O-])OCC[N+](C)(C)C)OC(=O)CCCCC/C=C\C/C=C\C/C=C\C/C=C\C/C=C\CC	0.32678	1.08997
PC 42:6	DSVRMAGYENFTLY-GDDYDVMSSA-N	52923651	CCCCC/C=C\C/C=C\CCCCCCCCCC(=O)O[C@H](COC(=O)CCCCC/C=C\C/C=C\C/C=C\C/C=C\CCCCC)COP(=O)([O-])OCC[N+](C)(C)C	0.00205982	1.66389
PC 44:3	GZZUNXHFXFGEBB-MXZPZXETSA-N	52923541	CCCCCCCCCC/C=C\CCCCCCCCCC(=O)OC[C@H](COP(=O)([O-])OCC[N+](C)(C)C)OC(=O)CCCCCCCCCCC/C=C\C/C=C\CCCCC	0.00210819	0.786287
PC 44:4	UIAAGLPOUUFIRG-ZUEQPGPOSA-N	52923481	CCCCCCCCCCCCCCCCCCCCCC(=O)OC[C@H](COP(=O)([O-])OCC[N+](C)(C)C)OC(=O)CCCCC/C=C\C/C=C\C/C=C\C/C=C\CCCCC	0.161459	0.888416
PC p34:1	OIICTMOQBYZCDA-IIKIFWEUSA-N	11125520	CCCCCCCCCCCCCCCC/C=C\OC[C@H](COP(=O)([O-])OCC[N+](C)(C)C)OC(=O)CCCCCCCCCCCCCCC	0.000671373	0.81214
PC p34:2	KMNVIRCHUMQGHD-RCINKDPXSA-N	52923934	CCCCCCCCCCCCCCCC/C=C\OC[C@H](COP(=O)([O-])OCC[N+](C)(C)C)OC(=O)CCCCCCC/C=C\CCCCCC	2.35404e-05	0.769924
PC p34:3	QLEHHUPUHJPURI-PWYDUFMYSA-N	24779386	CCCCCCCCCCCCCC/C=C\OC[C@H](COP(=O)([O-])OCC[N+](C)(C)C)OC(=O)CCCCCCC/C=C\C/C=C\CCCCC	0.973571	1.00568
PC p36:3	SOUZQPFUXRVDGK-KCTKZSJBSA-N	53481701	CCCCCCCCCCCCCCCCOC[C@H](COP(=O)([O-])OCC[N+](C)(C)C)OC(=O)CCCCCC/C=C\C/C=C\C/C=C\C/C=C\CC	0.709424	1.0267
PC p36:4	IOYKZPNDXIIXLN-LOQSCQKMSA-N	24779388	CCCCCCCCCCCCCC/C=C\OC[C@H](COP(=O)([O-])OCC[N+](C)(C)C)OC(=O)CCC/C=C\C/C=C\C/C=C\C/C=C\CCCCC	0.00878352	0.828315
PC p38:3	WOSDZWBQBJHAMR-NOQLVGMBSA-N	52925093	CCCCCCCCCCCCCCCC/C=C\OC[C@H](COP(=O)(O)OCCN)OC(=O)CCCCCCCCCCC/C=C\C/C=C\CCCCC	0.161459	1.14359
PC p38:4	BAKDTVUHENQVRW-IXXGCMLPSA-N	52925117	CCCCCCCCCCCCCCCCCC/C=C\OC[C@H](COP(=O)(O)OCCN)OC(=O)CCCCCC/C=C\C/C=C\C/C=C\CCCCC	0.00176115	0.808063
PE 34:2	HBZNVZIRJWODIB-NHCUFCNUSA-N	46891780	CCCCCCCCCCCCCCCC(=O)OC[C@H](COP(=O)([O-])OCC[NH3+])OC(=O)CCCCCCC/C=C\C/C=C\CCCCC	0.607208	1.09008
PE 36:2	DXXUYBAISOHOLM-XRIXOMQFSA-N	52924894	CCCCCCCCCCCCCCCCCC(=O)O[C@H](COC(=O)CCCCCCC/C=C\C/C=C\CCCCC)COP(=O)(O)OCCN	2.22707e-08	1.78461
PE 36:3	GKAFCSRKMWFPSJ-RJXNKANHSA-N	71728379	CCCCCCCC/C=C\CCCCCCCC(=O)OC[C@H](COP(=O)([O-])OCC[NH3+])OC(=O)CCCCCCC/C=C\C/C=C\CCCCC	0.772167	0.987747
PE 36:4	DUQDVNACTOXOJA-KTKXOIIHSA-N	52924875	CCCCCCCCCCCCCCCC(=O)O[C@H](COC(=O)CCC/C=C\C/C=C\C/C=C\C/C=C\CCCCC)COP(=O)(O)OCCN	0.0299163	1.22728
PE 38:2	CLPMAPXZURYSNH-CNBLIUODSA-N	9546825	CCCCCCCCCCCCCCCCCCCC(=O)OC[C@H](COP(=O)(O)OCCN)OC(=O)CCCCCCC/C=C\C/C=C\CCCCC	9.48692e-05	1.33065
PE 38:4	ANRKEHNWXKCXDB-BHFWLYLHSA-N	46891781	CCCCCCCCCCCCCCCCCC(=O)OC[C@H](COP(=O)([O-])OCC[NH3+])OC(=O)CCC/C=C\C/C=C\C/C=C\C/C=C\CCCCC	0.284065	1.13782
PE 38:6	LFGBKOUQHCWBQI-BZGLIJSBSA-N	52924893	CCCCC/C=C\C/C=C\CCCCCCCC(=O)OC[C@H](COP(=O)(O)OCCN)OC(=O)CCC/C=C\C/C=C\C/C=C\C/C=C\CCCCC	0.000694507	0.646973
PE 40:6	FEABWDMFZNBFCT-KUVQHVNNSA-N	52924379	CCCCC/C=C\C/C=C\CCCCCCCC(=O)OC[C@H](COP(=O)(O)OCCN)OC(=O)CCCCC/C=C\C/C=C\C/C=C\C/C=C\CCCCC	7.63596e-06	0.669916
Phosphatidylglycerol 29:0	RYHJACYQTJIGMZ-JHOUSYSJSA-N	52926457	CCCCCCCCCCCCCCCC(=O)OC[C@H](COP(=O)(O)OC[C@H](CO)O)OC(=O)CCCCCCCCCCCC	0.626355	0.983359
Plasmenyl-PC 34:2	IQACMFWAGALEAQ-WESJWMGVSA-N	6443157	CCCCCCCCCCCCCCCCOC[C@H](COP(=O)([O-])OCC[N+](C)(C)C)OC(=O)CCCCCCC/C=C\C/C=C\CCCCC	0.428452	1.09906
Plasmenyl-PC 36:6	JCIBOIAZHLGPOT-YAYDGDQKSA-N	70698851	CCCCCC/C=C\CCCCCCCC/C=C\O[C@H](COC(=O)CCCC/C=C\C/C=C\C/C=C\C/C=C\CC)COP(=O)([O-])OCC[N+](C)(C)C	0.955045	0.992454
Plasmenyl-PC 38:5	FHHVIBPVBBRLOR-IYACIECVSA-N	24779390	CCCCCCCCCCCCCCCC/C=C\OC[C@H](COP(=O)([O-])OCC[N+](C)(C)C)OC(=O)CCC/C=C\C/C=C\C/C=C\C/C=C\CCCCC	0.639299	1.0589
Plasmenyl-PE 36:3	XVXISDREVDGQPX-PISDLAQISA-N	52925079	CCCCCCCCCCCCCCCC/C=C\OC[C@H](COP(=O)(O)OCCN)OC(=O)CCCCCCC/C=C\C/C=C\CCCCC	0.533761	1.06275
Plasmenyl-PE 36:5	UUYSKERSKRMYME-MAIXUNBTSA-N	52925126	CCCCCCCCCCCCCC/C=C\OC[C@H](COP(=O)(O)OCCN)OC(=O)CCC/C=C\C/C=C\C/C=C\C/C=C\CCCCC	0.00154472	0.723352
Plasmenyl-PE 36:6	RLLOITCRNQRGJD-DFAKUSJGSA-N	52925061	CCCCCCCCCCCCCC/C=C\OC[C@H](COP(=O)(O)OCCN)OC(=O)CCC/C=C\C/C=C\C/C=C\C/C=C\C/C=C\CC	0.0044305	0.533827
Plasmenyl-PE 38:5	URPXXNCTXCOATD-FXMFQVEGSA-N	86289532	CCCCCCCCCCCCCCCC/C=C\OC[C@H](COP(=O)([O-])OCC[NH3+])OC(=O)CCC/C=C\C/C=C\C/C=C\C/C=C\CCCCC	0.0264034	0.76859
Plasmenyl-PE 38:6	KCNBSSYOJRUKOM-JALPNNRCSA-N	52925089	CCCCCCCCCCCCCCCC/C=C\OC[C@H](COP(=O)(O)OCCN)OC(=O)CCC/C=C\C/C=C\C/C=C\C/C=C\C/C=C\CC	0.000920403	0.690195
Plasmenyl-PE 38:7	WVGALBKSWOUIEZ-XNHMFJFDSA-N	5283497	CCCCCCCCCCCCCC/C=C\OC[C@H](COP(=O)(O)OCCN)OC(=O)CC/C=C\C/C=C\C/C=C\C/C=C\C/C=C\C/C=C\CC	1.17039e-11	0.442122
Plasmenyl-PE 40:6	CVCZYWPCMUWTNS-IXKBFPPMSA-N	52925119	CCCCCCCCCCCCCCCCCC/C=C\OC[C@H](COP(=O)(O)OCCN)OC(=O)CCC/C=C\C/C=C\C/C=C\C/C=C\C/C=C\CC	0.287625	0.829094
Plasmenyl-PE 40:7	FIJFPUAJUDAZEY-MNDXXDKYSA-N	42607458	CCCCCCCCCCCCCCCC/C=C\OC[C@H](COP(=O)(O)OCCN)OC(=O)CC/C=C\C/C=C\C/C=C\C/C=C\C/C=C\C/C=C\CC	7.76136e-07	0.515072
PS 38:3	BQBTWCBZEKRLFP-BGFRNLFWSA-N	52925523	CCCCCCCCCCCCCCCCCCCC(=O)O[C@H](COC(=O)CCCCCCC/C=C\C/C=C\C/C=C\CC)COP(=O)(O)OC[C@@H](C(=O)O)N	0.714363	1.01124
PS 38:4	SVOUGFFDROZBJI-DNALCEECSA-N	24779545	CCCCCCCCCCCCCCCCCC(=O)OC[C@H](COP(=O)(O)OC[C@@H](C(=O)O)N)OC(=O)CCC/C=C\C/C=C\C/C=C\C/C=C\CCCCC	0.430645	1.01804
PS 40:3	BTIQFPURPAGQHS-HOSNKBABSA-N	52925502	CCCCCCCCCCCCCCCCCCCCCC(=O)O[C@H](COC(=O)CCCC/C=C\C/C=C\C/C=C\CCCCC)COP(=O)(O)OC[C@@H](C(=O)O)N	0.949711	0.993684
PS 40:4	GBBNRADSWUALEU-AEDAHVLISA-N	52925748	CCCCCCCCCCCCCCCCCCCC(=O)O[C@H](COC(=O)CCC/C=C\C/C=C\C/C=C\C/C=C\CCCCC)COP(=O)(O)OC[C@@H](C(=O)O)N	0.988046	0.999713
PS 40:6	LYYHRRPTEXPVOR-SYEOQEKUSA-N	24779546	CCCCCCCCCCCCCCCCCC(=O)OC[C@H](COP(=O)(O)OC[C@@H](C(=O)O)N)OC(=O)CC/C=C\C/C=C\C/C=C\C/C=C\C/C=C\C/C=C\CC	0.100609	1.06073
PS 42:5	VNQACVFLMLYTLE-WDLXSBMRSA-N	52925755	CCCCCCCCCC/C=C\CCCCCCCCCC(=O)O[C@H](COC(=O)CCC/C=C\C/C=C\C/C=C\C/C=C\CCCCC)COP(=O)(O)OC[C@@H](C(=O)O)N	0.00162348	1.23718
PS 42:6	WOBFEYJLJCLDBR-NISVGTQTSA-N	52925756	CCCCC/C=C\C/C=C\CCCCCCCCCCCC(=O)O[C@H](COC(=O)CCC/C=C\C/C=C\C/C=C\C/C=C\CCCCC)COP(=O)(O)OC[C@@H](C(=O)O)N	0.840343	1.01703
PS 42:8	ROCNHMAZFKRILY-PRDJOCNNSA-N	52925757	CCCCC/C=C\C/C=C\C/C=C\C/C=C\CCCCCC(=O)O[C@H](COC(=O)CCC/C=C\C/C=C\C/C=C\C/C=C\CCCCC)COP(=O)(O)OC[C@@H](C(=O)O)N	2.74261e-05	0.61134
PS p34:0	OHPHIZCKAAJKOG-PBSRCHRYSA-N	52926194	CCCCCCCCCCCCCCCCCC(=O)O[C@H](CO/C=C\CCCCCCCCCCCCCC)COP(=O)(O)OC[C@@H](C(=O)O)N	0.474865	1.0764
SM 33:1	LQINJRUGTUOHGS-YPDYIYJKSA-N	52931139	CCCCCCCCCCCCCCC(=O)N[C@@H](COP(=O)([O-])OCC[N+](C)(C)C)[C@@H](/C=C/CCCCCCCCCCCCC)O	0.0870812	1.13759
SM 34:0	QHZIGNLCLJPLCU-QPPIDDCLSA-N	9939965	CCCCCCCCCCCCCCC[C@H]([C@H](COP(=O)([O-])OCC[N+](C)(C)C)NC(=O)CCCCCCCCCCCCCCC)O	0.0995146	0.839273
SM d16:1/20:0	LKQLRGMMMAHREN-YJFXYUILSA-N	6453725	CCCCCCCCCCCCCCCCCC(=O)N[C@@H](COP(=O)([O-])OCC[N+](C)(C)C)[C@@H](/C=C/CCCCCCCCCCCCC)O	0.0130548	0.857884
SM d16:1/20:1	NBEADXWAAWCCDG-QDDWGVBQSA-N	6443882	CCCCCCCCCCCCC/C=C/[C@H]([C@H](COP(=O)([O-])OCC[N+](C)(C)C)NC(=O)CCCCCCC/C=C\CCCCCCCC)O	0.681479	0.968765
SM d18:1/14:0	KYICBZWZQPCUMO-PSALXKTOSA-N	11433862	CCCCCCCCCCCCC/C=C/[C@H]([C@H](COP(=O)([O-])OCC[N+](C)(C)C)NC(=O)CCCCCCCCCCCCC)O	0.248261	0.904177
SM d18:1/16:0	RWKUXQNLWDTSLO-GWQJGLRPSA-N	9939941	CCCCCCCCCCCCCCCC(=O)N[C@@H](COP(=O)([O-])OCC[N+](C)(C)C)[C@@H](/C=C/CCCCCCCCCCCCC)O	0.0223159	0.9211
SM d18:1/16:1	YLWSJLLZUHSIEA-CKSUKHGVSA-N	52931235	CCCCCCCCCCCCCCCC(=O)N[C@@H](COP(=O)([O-])OCC[N+](C)(C)C)[C@@H](/C=C/CCCCCCCC/C=C\CCC)O	0.0293223	0.898453
SM d18:1/20:0	AADLTHQNYQJHQV-SVLGDMRNSA-N	44260124	CCCCCCCCCCCCCCCCCCCC(=O)N[C@@H](COP(=O)([O-])OCC[N+](C)(C)C)[C@@H](/C=C/CCCCCCCCCCCCC)O	0.00875406	0.841931
SM (d18:1/20:1)	MDRFMTLYKHBJTF-NQYLGBTJSA-N	52931179	CCCCCCCCCCCCC/C=C/[C@H]([C@H](COP(=O)([O-])OCC[N+](C)(C)C)NC(=O)CCCCCCCCC/C=C\CCCCCCCC)O	0.126081	0.91169
SM d18:1/21:0	YXSZOBWVQJIWNE-QVDCKBILSA-N	52931193	CCCCCCCCCCCCCCCCCCCCC(=O)N[C@@H](COP(=O)([O-])OCC[N+](C)(C)C)[C@@H](/C=C/CCCCCCCCCCCCC)O	0.0234002	1.24891
SM d18:1/22:0	FJJANLYCZUNFSE-TWKUQIQBSA-N	44260125	CCCCCCCCCCCCCCCCCCCCCC(=O)N[C@@H](COP(=O)([O-])OCC[N+](C)(C)C)[C@@H](/C=C/CCCCCCCCCCCCC)O	0.342374	0.946757
SM d18:1/23:0	SXZWBNWTCVLZJN-NMIJJABPSA-N	46891684	CCCCCCCCCCCCCCCCCCCCCCC(=O)N[C@@H](COP(=O)([O-])OCC[N+](C)(C)C)[C@@H](/C=C/CCCCCCCCCCCCC)O	0.00909499	1.23674
SM d18:1/24:0	QEDPUVGSSDPBMD-XTAIVQBESA-N	44260127	CCCCCCCCCCCCCCCCCCCCCCCC(=O)N[C@@H](COP(=O)([O-])OCC[N+](C)(C)C)[C@@H](/C=C/CCCCCCCCCCCCC)O	0.0618751	0.8534
SM d18:2/23:0	JBDGKEXQKCCQFK-JWQIMADESA-N	52931209	CCCCCCCCCCCCCCCCCCCCCCC(=O)N[C@@H](COP(=O)([O-])OCC[N+](C)(C)C)[C@@H](/C=C/CCCCCCCC/C=C\CCC)O	0.0124423	1.20044
SM d18:2/24:0	DACOGJMBYLZYDH-GXJPFUDISA-N	52931217	CCCCCCCCCCCCCCCCCCCCCCCC(=O)N[C@@H](COP(=O)([O-])OCC[N+](C)(C)C)[C@@H](/C=C/CCCCCCCC/C=C\CCC)O	7.77334e-06	0.699736
SM (d18:2/24:1)	TXFLWJQVQCDUDZ-BRUGZULGSA-N	52931215	CCCCCCCC/C=C\CCCCCCCCCCCCCC(=O)N[C@@H](COP(=O)([O-])OCC[N+](C)(C)C)[C@@H](/C=C/CCCCCCCC/C=C\CCC)O	8.90846e-05	0.799113
TG 42:0	DUXYWXYOBMKGIN-UHFFFAOYSA-N	11148	CCCCCCCCCCCCCC(=O)OCC(COC(=O)CCCCCCCCCCCCC)OC(=O)CCCCCCCCCCCCC	0.332761	0.685329
TG 44:1	UZLGGKDLJGDGEY-WVSHCNQOSA-N	56936554	CCCCCCCCCCCCCC(=O)OC[C@H](COC(=O)CCCCCCC/C=C\CCCCCC)OC(=O)CCCCCCCCCCCCC	0.180978	0.62129
TG 46:0	JWVXCFSNEOMSHH-YACUFSJGSA-N	91865745	CCCCCCCCCCCCCCCC(=O)OC[C@@H](COC(=O)CCCCCCCCCCCCC)OC(=O)CCCCCCCCCCCCCCC	0.988046	1.00472
TG 46:1	RSDIQTNCDWUNDP-JHXSWNAYSA-N	56936558	CCCCCCCCCCCCCC(=O)OC[C@H](COC(=O)CCCCCCC/C=C\CCCCCCCC)OC(=O)CCCCCCCCCCCCC	0.0836297	0.6183
TG 46:2	XUEMVUXNOCIHLG-MOFPORNTSA-N	56936582	CCCCCCCCCCCCCC(=O)OC[C@H](COC(=O)CCCCCCC/C=C\CCCCCC)OC(=O)CCCCCCC/C=C\CCCCCC	0.129916	0.610791
TG 46:3	AQARPXOEHQBBQN-OJJDTYCWSA-N	56936561	CCCCCCCCCCCCCC(=O)OC[C@H](COC(=O)CCCCCCC/C=C\C/C=C\C/C=C\CC)OC(=O)CCCCCCCCCCCCC	0.329211	0.741751
TG 48:0	PVNIQBQSYATKKL-UHFFFAOYSA-N	11147	CCCCCCCCCCCCCCCC(=O)OCC(COC(=O)CCCCCCCCCCCCCCC)OC(=O)CCCCCCCCCCCCCCC	0.988046	0.997642
TG 48:1	FEKLSEFRUGWUOS-DLOIZKPKSA-N	9543986	CCCCCCCCCCCCCCCC(=O)OC[C@H](COC(=O)CCCCCCC/C=C\CCCCCC)OC(=O)CCCCCCCCCCCCCCC	0.687656	0.939672
TG 48:2	RUOVJPPUXXFZPC-YZEIBMOJSA-N	9543987	CCCCCCCCCCCCCCCC(=O)OC[C@H](COC(=O)CCCCCCC/C=C\CCCCCC)OC(=O)CCCCCCC/C=C\CCCCCC	0.406927	0.835149
TG 48:3	SKGWNZXOCSYJQL-BUTYCLJRSA-N	9543989	CCCCCC/C=C\CCCCCCCC(=O)OCC(OC(=O)CCCCCCC/C=C\CCCCCC)COC(=O)CCCCCCC/C=C\CCCCCC	0.104064	0.59946
TG 49:0	TTWJTJMWHOYBPQ-ANFMRNGASA-N	9543988	CCCCCCCCCCCCCCCCC(=O)OC[C@@H](COC(=O)CCCCCCCCCCCCCCC)OC(=O)CCCCCCCCCCCCCCC	0.163476	1.39868
TG 49:1	VYYGQDOPVVYUKW-UKFBYESTSA-N	9543991	CCCCCCCCCCCCCCCC(=O)OC[C@H](COC(=O)CCCCCCC/C=C\CCCCCCC)OC(=O)CCCCCCCCCCCCCCC	0.0274562	1.55118
TG 49:2	QZYSUBAQYSVFNX-PSMULLBHSA-N	9543993	CCCCCCCCCCCCCCCCC(=O)OC[C@@H](COC(=O)CCCCCCC/C=C\CCCCCC)OC(=O)CCCCCCC/C=C\CCCCCC	0.00528043	1.56929
TG 50:0	QRJMBNGGFSPTQP-BXJPYAOGSA-N	3246958	[2H]C([2H])(C([2H])(C([2H])([2H])OC(=O)CCCCCCCCCCCCCCC)OC(=O)CCCCCCCCCCCCCCCCC)OC(=O)CCCCCCCCCCCCCCC	0.412993	0.816259
TG 50:1	YHMDGPZOSGBQRH-YYSBDVFPSA-N	25240460	CCCCCCCCCCCCCCCC(=O)OC[C@H](COC(=O)CCCCCCC/C=C\CCCCCCCC)OC(=O)CCCCCCCCCCCCCCC	0.331649	0.927416
TG 50:2	QEZWFCZNHWUARW-XQCAQTCHSA-N	9544010	CCCCCCCCCCCCCCCCCC(=O)OC[C@@H](COC(=O)CCCCCCC/C=C\CCCCCC)OC(=O)CCCCCCC/C=C\CCCCCC	0.505028	0.950638
TG 50:3	UFHNZOACKFBCOM-YXKNDSBASA-N	25240357	CCCCCCCC/C=C\CCCCCCCC(=O)OC[C@@H](COC(=O)CCCCCCC/C=C\CCCCCC)OC(=O)CCCCCCC/C=C\CCCCCC	0.978807	0.99407
TG 50:4	PVMBAGXWHHZKFP-JMPJWMFJSA-N	25240359	CCCCCC/C=C\CCCCCCCC(=O)OC[C@H](COC(=O)CCCCCCC/C=C\C/C=C\CCCCC)OC(=O)CCCCCCC/C=C\CCCCCC	0.562159	0.87872
TG 50:5	AFTBPUXZTDLRSP-UDQIKIEDSA-N	9544045	CCCCCC/C=C\CCCCCCCC(=O)OC[C@H](COC(=O)CCCCCCC/C=C\C/C=C\C/C=C\CC)OC(=O)CCCCCCC/C=C\CCCCCC	0.103003	0.714705
TG 51:1	OZAXLAGNPZMZAD-BOEMPQCLSA-N	9544006	CCCCCCCCCCCCCCCCC(=O)OC[C@H](COC(=O)CCCCCCC/C=C\CCCCCCC)OC(=O)CCCCCCCCCCCCCCCC	0.194891	1.29759
TG 51:2	NSNSZGBCOIKUBU-SZOKBDNISA-N	9544013	CCCCCCCCCCCCCCCCC(=O)OC[C@H](COC(=O)CCCCCCC/C=C\CCCCCCC)OC(=O)CCCCCCC/C=C\CCCCCCC	0.0416456	1.35324
TG 51:3	ISSGPXMQOMAFMJ-DMGKHJLRSA-N	9544023	CCCCCCC/C=C\CCCCCCCC(=O)OCC(OC(=O)CCCCCCC/C=C\CCCCCCC)COC(=O)CCCCCCC/C=C\CCCCCCC	0.00427286	1.40118
TG 51:4	IIRQXNVLAXQEKB-KBEZCZBDSA-N	9544052	CCCCCCCC/C=C\CCCCCCCC(=O)OC[C@@H](COC(=O)CCCCCCC/C=C\CCCCCC)OC(=O)CCCCCCC/C=C\C/C=C\CCCC	0.11462	1.24071
TG 52:0	SDNYRTVJOFMYIW-OIVUAWODSA-N	545690	CCCCCCCCCCCCCCCCCC(=O)OC[C@@H](COC(=O)CCCCCCCCCCCCCCC)OC(=O)CCCCCCCCCCCCCCCCC	0.160026	0.649216
TG 52:1	NPCZZYKITFKRQZ-FQUZZJBASA-N	25240360	CCCCCCCCCCCCCCCCCC(=O)O[C@H](COC(=O)CCCCCCCCCCCCCCC)COC(=O)CCCCCCC/C=C\CCCCCCCC	0.0870812	0.744602
TG 52:2	KGLAHZTWGPHKFF-RISKEULASA-N	25240361	CCCCCCCCCCCCCCCC(=O)OC[C@H](COC(=O)CCCCCCC/C=C\C/C=C\CCCCC)OC(=O)CCCCCCC/C=C\CCCCCCCC	0.0416788	0.923792
TG 52:4	WHSWXEYWNPTUPW-HNJDVRDNSA-N	25240364	CCCCCCCC/C=C\CCCCCCCC(=O)O[C@H](COC(=O)CCCCCCC/C=C\CCCCCC)COC(=O)CCCCCCC/C=C\C/C=C\CCCCC	0.160026	0.835075
TG 52:5	CQZAAIKPSLHIBC-KDJOUNIJSA-N	25240366	CCCCCC/C=C\CCCCCCCC(=O)OC[C@H](COC(=O)CCCCCCC/C=C\C/C=C\CCCCC)OC(=O)CCCCCCC/C=C\C/C=C\CCCCC	0.100609	0.745574
TG 53:0	ZJUXHXMIKPSINE-IONAWPRUSA-N	9544181	CCCCCCCCCCCCCCCCCCCCC(=O)OC[C@@H](COC(=O)CCCCCCCCCCCCCCC)OC(=O)CCCCCCCCCCCCCCC	0.973571	1.01327
TG 53:1	WWJIBIGWKGFVAQ-JNSYTQKUSA-N	9544081	CCCCCCCCCCCCCCCCCC(=O)OC[C@@H](COC(=O)CCCCCCC/C=C\CCCCCCC)OC(=O)CCCCCCCCCCCCCCCCC	0.681479	1.12113
TG 53:2	RSINITWKVQRWSZ-RFVLVDBCSA-N	9544102	CCCCCCCCCCCCCCCCCC(=O)OC[C@@H](COC(=O)CCCCCCC/C=C\C/C=C\CCCC)OC(=O)CCCCCCCCCCCCCCCCC	0.406927	1.12988
TG 53:3	ZNQBEJJYVJSZLM-LEDQTTRKSA-N	9544126	CCCCCCCC/C=C\CCCCCCCC(=O)OC[C@@H](COC(=O)CCCCCCC/C=C\CCCCCCC)OC(=O)CCCCCCC/C=C\CCCCCCCC	0.282363	1.14796
TG 53:4	BMSDHYZLQWTKSQ-LSJAAEOESA-N	9544152	CCCCCCCC/C=C\CCCCCCCC(=O)OC[C@@H](COC(=O)CCCCCCC/C=C\C/C=C\CCCC)OC(=O)CCCCCCC/C=C\CCCCCCCC	0.0872603	1.21221
TG 53:5	QHYAATSKYBYSLG-BXDFBOBBSA-N	9544183	CCCCCCC/C=C\CCCCCCCC(=O)OC[C@H](COC(=O)CCCCCCC/C=C\C/C=C\CCCCC)OC(=O)CCCCCCC/C=C\C/C=C\CCCCC	0.319579	0.819183
TG 54:0	DCXXMTOCNZCJGO-UHFFFAOYSA-N	11146	CCCCCCCCCCCCCCCCCC(=O)OCC(COC(=O)CCCCCCCCCCCCCCCCC)OC(=O)CCCCCCCCCCCCCCCCC	0.105381	0.705746
TG 54:1	YFFIQXNTTVSKJC-NZEOUKRFSA-N	16058371	CCCCCCCCCCCCCCCCCC(=O)OC[C@H](COC(=O)CCCCCCC/C=C\CCCCCCCC)OC(=O)CCCCCCCCCCCCCCCCC	0.120977	0.684957
TG 54:2	RYNHWWNZNIGDAQ-BMTCQUSZSA-N	16058372	CCCCCCCCCCCCCCCCCC(=O)OC[C@H](COC(=O)CCCCCCC/C=C\CCCCCCCC)OC(=O)CCCCCCC/C=C\CCCCCCCC	0.0187889	0.707641
TG 54:3	PHYFQTYBJUILEZ-IUPFWZBJSA-N	5497163	CCCCCCCC/C=C\CCCCCCCC(=O)OCC(OC(=O)CCCCCCC/C=C\CCCCCCCC)COC(=O)CCCCCCC/C=C\CCCCCCCC	0.0219243	0.811859
TG 54:4	BRLGHZXETDWABO-NOFIOOQLSA-N	9544255	CCCCCCCCCCCCCCCCCC(=O)OC[C@H](COC(=O)CCCCCCC/C=C\C/C=C\C/C=C\CC)OC(=O)CCCCCCC/C=C\CCCCCCCC	0.0870812	0.807366
TG 54:5	VVEBTVMJPTZDHO-YQFZQLSNSA-N	25240373	CCCCCCCC/C=C\CCCCCCCC(=O)OC[C@H](COC(=O)CCCCCCC/C=C\C/C=C\CCCCC)OC(=O)CCCCCCC/C=C\C/C=C\CCCCC	0.0136898	0.715356
TG 54:6	HBOQXIRUPVQLKX-BBWANDEASA-N	5322095	CCCCC/C=C\C/C=C\CCCCCCCC(=O)OCC(OC(=O)CCCCCCC/C=C\C/C=C\CCCCC)COC(=O)CCCCCCC/C=C\C/C=C\CCCCC	0.0808273	0.683943
TG 54:8	BMPVTDWOWBNPJU-NYRSPQLFSA-N	9544413	CCCCC/C=C\C/C=C\C/C=C\C/C=C\CCCC(=O)OC[C@@H](COC(=O)CCCCCCC/C=C\C/C=C\CCCC)OC(=O)CCCCCCC/C=C\C/C=C\CCCC	0.211453	0.683727
TG 56:1	OCYFAHIHWCVZKS-FHSLLVMSSA-N	9544345	CCCCCCCCCCCCCCCCCCCC(=O)OC[C@@H](COC(=O)CCCCCCCCCCCCCCCCC)OC(=O)CCCCCCC/C=C\CCCCCCCC	0.00148143	0.524481
TG 56:2	PDEQUPGHMOMBFC-FYEHETCMSA-N	9544390	CCCCCCCCCCCCCCCCCCCC(=O)OC[C@@H](COC(=O)CCCCCCCCCCCCCCCCC)OC(=O)CCCCCCC/C=C\C/C=C\CCCCC	0.000388448	0.460605
TG 56:3	QXMHHXQBBKDSSL-BAQZNRHJSA-N	9544447	CCCCCCCC/C=C\CCCCCCCCCC(=O)OC[C@@H](COC(=O)CCCCCCC/C=C\CCCCCCCC)OC(=O)CCCCCCC/C=C\CCCCCCCC	0.000268673	0.513557
TG 56:4	YONCDTJKIZDSKQ-IYASBODOSA-N	25240379	CCCCCCCC/C=C\CCCCCCCCCC(=O)OC[C@@H](COC(=O)CCCCCCC/C=C\CCCCCCCC)OC(=O)CCCCCCC/C=C\C/C=C\CCCCC	0.0508682	0.666901
TG 56:5	UHEJWASONFIROS-YPSHDQQVSA-N	25240380	CCCCCCCC/C=C\CCCCCCCCCC(=O)OC[C@@H](COC(=O)CCCCCCC/C=C\C/C=C\CCCCC)OC(=O)CCCCCCC/C=C\C/C=C\CCCCC	0.366272	0.852561
TG 56:6	ZTNDRFCABXFVMY-WJTCTALZSA-N	9544625	CCCCC/C=C\C/C=C\CCCCCCCCCC(=O)OC[C@@H](COC(=O)CCCCCCC/C=C\C/C=C\CCCCC)OC(=O)CCCCCCC/C=C\C/C=C\CCCCC	0.687656	1.08999
TG 56:7	DODZUDCYRVWEOJ-GKZBLMSTSA-N	9544695	CCCCC/C=C\C/C=C\CCCCCCCC(=O)OC[C@H](COC(=O)CCCCCC/C=C\C/C=C\C/C=C\CCCCC)OC(=O)CCCCCCC/C=C\C/C=C\CCCCC	0.000388448	0.601209
TG 56:8	UBGUHMDKBGQUND-VPFWBQFRSA-N	9544762	CCCCCCCCCCCCCCCC(=O)OC[C@H](COC(=O)CCC/C=C\C/C=C\C/C=C\C/C=C\CCCCC)OC(=O)CCC/C=C\C/C=C\C/C=C\C/C=C\CCCCC	2.93999e-06	0.38474
TG 58:1	OWZMHFAFGQCCNI-FBXRAONGSA-N	25240381	CCCCCCCCCCCCCCCCCCCC(=O)OC[C@@H](COC(=O)CCCCCCC/C=C\CCCCCCCC)OC(=O)CCCCCCCCCCCCCCCCCCC	0.0111988	0.56761
TG 58:2	GXWBCAVCOMAOHT-VMCJOIRWSA-N	9545277	CCCCC/C=C\C/C=C\CCCCCCCC(=O)OC[C@H](COC(=O)CCC/C=C\C/C=C\C/C=C\C/C=C\CCCCC)OC(=O)CCC/C=C\C/C=C\C/C=C\C/C=C\CCCCC	0.00306303	0.538166
TG 58:3	RFMSTHTUAZETPD-JJPHLYBUSA-N	9544748	CCCCCCCC/C=C\CCCCCCCCCC(=O)OC[C@@H](COC(=O)CCCCCCC/C=C\CCCCCCCC)OC(=O)CCCCCCCCC/C=C\CCCCCCCC	0.00813146	0.528091
TG 58:4	CCKRHDUCFMOBKX-AAINFQTBSA-N	9544835	CCCCCCCCCCCCCCCCCCCC(=O)O[C@H](COC(=O)CCCCCCCCCCCCCCCCC)COC(=O)CCC/C=C\C/C=C\C/C=C\C/C=C\CCCCC	0.00187513	0.47542
TG 58:6	GSNFRUMSEHHPSY-LCXCSEBNSA-N	9544977	CCCCCCCC/C=C\CCCCCCCCCC(=O)O[C@H](COC(=O)CCCCCCC/C=C\CCCCCCCC)COC(=O)CCC/C=C\C/C=C\C/C=C\C/C=C\CCCCC	0.0995146	0.764903
TG 58:8	KWIGMCRWEINBIR-HUPVKWKYSA-N	9545124	CCCCCCCCCCCCCCCCCC(=O)OC[C@H](COC(=O)CCC/C=C\C/C=C\C/C=C\C/C=C\CCCCC)OC(=O)CCC/C=C\C/C=C\C/C=C\C/C=C\CCCCC	0.000933108	0.538267
TG 58:9	RVXFSLZMZOFGEQ-SWIIBWKZSA-N	9545200	CCCCCCCC/C=C\CCCCCCCC(=O)OC[C@H](COC(=O)CCC/C=C\C/C=C\C/C=C\C/C=C\CCCCC)OC(=O)CCC/C=C\C/C=C\C/C=C\C/C=C\CCCCC	3.62656e-05	0.450498
TG 60:1	YNDXXWKSWMKVGO-HZLQDPIMSA-N	9544965	CCCCCCCCCCCCCCCCCCCC(=O)OC[C@H](COC(=O)CCCCCCCCC/C=C\CCCCCCCC)OC(=O)CCCCCCCCCCCCCCCCCCC	0.0624408	0.734739
TG 60:11	ASSZWZBQIXMMKM-SYTPEAHJSA-N	9545730	CCCCC/C=C\C/C=C\C/C=C\CCCCCCC(=O)OC[C@H](COC(=O)CCC/C=C\C/C=C\C/C=C\C/C=C\CCCCC)OC(=O)CCC/C=C\C/C=C\C/C=C\C/C=C\CCCCC	0.00019543	0.463602
TG 60:2	QPNVLDQSHXVPMG-JMYPUKFOSA-N	9545040	CCCCCCCCCCCCCCCCCCCC(=O)OC[C@H](COC(=O)CCCCCCCCC/C=C\CCCCCCCC)OC(=O)CCCCCCCCC/C=C\CCCCCCCC	0.0432855	0.666242
TG 62:1	TZLOSVAFXBPUQT-VBMMIZSXSA-N	9545526	CCCCCCCCCCCCCCCCCCCCCC(=O)OC[C@H](COC(=O)CCCCCCCCCCCCCCCCCCC)OC(=O)CCCCCCCCC/C=C\CCCCCCCC	0.366358	0.867621

## Sheet: Table S6
S6. Lipidome differential abundance analysis: Cluster IV vs Cluster III at Visit -6
Compound Name	InChiKeys	Pubchem ID	SMILES	pvalue	foldchange
CE 18:1	RJECHNNFRHZQKU-RMUVNZEASA-N	5283632	CCCCCCCC/C=C\CCCCCCCC(=O)O[C@H]1CC[C@@]2([C@H]3CC[C@]4([C@H]([C@@H]3CC=C2C1)CC[C@@H]4[C@H](C)CCCC(C)C)C)C	0.0396629	0.794468
CE 18:2	NAACPBBQTFFYQB-LJAITQKLSA-N	5287939	CCCCC/C=C\C/C=C\CCCCCCCC(=O)O[C@H]1CC[C@@]2([C@H]3CC[C@]4([C@H]([C@@H]3CC=C2C1)CC[C@@H]4[C@H](C)CCCC(C)C)C)C	0.922514	0.973971
CE 18:3	FYMCIBHUFSIWCE-WVXFKAQASA-N	6436907	CC/C=C\C/C=C\C/C=C\CCCCCCCC(=O)O[C@H]1CC[C@@]2([C@H]3CC[C@]4([C@H]([C@@H]3CC=C2C1)CC[C@@H]4[C@H](C)CCCC(C)C)C)C	0.267575	1.17501
CE 20:4	IMXSFYNMSOULQS-BEDFLICRSA-N	6479222	CCCCC/C=C\C/C=C\C/C=C\C/C=C\CCCC(=O)O[C@H]1CC[C@@]2([C@H]3CC[C@]4([C@H]([C@@H]3CC=C2C1)CC[C@@H]4[C@H](C)CCCC(C)C)C)C	0.251371	0.870734
CE 22:6	VOEVEGPMRIYYKC-HNJOWPRISA-N	14274978	CC/C=C\C/C=C\C/C=C\C/C=C\C/C=C\C/C=C\CCC(=O)O[C@H]1CC[C@@]2([C@H]3CC[C@]4([C@H]([C@@H]3CC=C2C1)CC[C@@H]4[C@H](C)CCCC(C)C)C)C	1.17677e-07	0.44871
Ceramide d18:1/23:0	NAJHAHQNQCNWOP-PUYNVXOJSA-N	52931115	CCCCCCCCCCCCCCCCCCCCCCC(=O)N[C@@H](CO)[C@@H](/C=C/CCCCCCCCCCCCC)O	0.00385386	1.25991
Ceramide d40:1	KEPQASGDXIEOIL-GLQCRSEXSA-N	5283567	CCCCCCCCCCCCCCCCCCCCCC(=O)N[C@@H](CO)[C@@H](/C=C/CCCCCCCCCCCCC)O	0.873349	1.01689
Ceramide d42:1	ZJVVOYPTFQEGPH-AUTSUKAISA-N	5283571	CCCCCCCCCCCCCCCCCCCCCCCC(=O)N[C@@H](CO)[C@@H](/C=C/CCCCCCCCCCCCC)O	0.95428	1.00681
Ceramide d42:2	VJSBNBBOSZJDKB-KPEYJIHVSA-N	5283568	CCCCCCCCCCCCC/C=C/[C@H]([C@H](CO)NC(=O)CCCCCCCCCCCCC/C=C\CCCCCCCC)O	0.000155032	0.673621
Cer (d18:1/16:0)	YDNKGFDKKRUKPY-TURZORIXSA-N	5283564	CCCCCCCCCCCCCCCC(=O)N[C@@H](CO)[C@@H](/C=C/CCCCCCCCCCCCC)O	0.629944	0.959428
Cholesterol	HVYWMOMLDIMFJA-DPAQBDIFSA-N	5997	C[C@H](CCCC(C)C)[C@H]1CC[C@@H]2[C@@]1(CC[C@H]3[C@H]2CC=C4[C@@]3(CC[C@@H](C4)O)C)C	0.482621	1.01448
DG 32:0	JEJLGIQLPYYGEE-XIFFEERXSA-N	644078	CCCCCCCCCCCCCCCC(=O)OC[C@H](CO)OC(=O)CCCCCCCCCCCCCCC	0.501575	1.12238
DG 34:0	VYQDALBEQRZDPL-DHUJRADRSA-N	3246945	CCCCCCCCCCCCCCCCCC(=O)OC[C@H](CO)OC(=O)CCCCCCCCCCCCCCC	0.516886	1.09481
DG 34:1	YEJYLHKQOBOSCP-OZKTZCCCSA-N	5282283	CCCCCCCCCCCCCCCC(=O)OC[C@H](CO)OC(=O)CCCCCCC/C=C\CCCCCCCC	0.961195	0.986419
DG 36:0	UHUSDOQQWJGJQS-UHFFFAOYSA-N	102615	CCCCCCCCCCCCCCCCCC(=O)OCC(CO)OC(=O)CCCCCCCCCCCCCCCCC	0.298651	0.932405
DG 36:2	AFSHUZFNMVJNKX-LLWMBOQKSA-N	9543716	CCCCCCCC/C=C\CCCCCCCC(=O)OC[C@H](CO)OC(=O)CCCCCCC/C=C\CCCCCCCC	0.988142	0.998297
DG 36:3	BLZVZPYMHLXLHG-JOBMVARSSA-N	9543722	CCCCCCCC/C=C\CCCCCCCC(=O)OC[C@H](CO)OC(=O)CCCCCCC/C=C\C/C=C\CCCCC	0.239842	1.169
DG 38:5	GRGDLDNREYVILP-CNWVQWJYSA-N	9543784	CCCCC/C=C\C/C=C\CCCCCCCCCC(=O)O[C@@H](CO)COC(=O)CCCCCCC/C=C\C/C=C\C/C=C\CC	0.792789	1.11481
DG 38:6	YDVDXUYJFQLPEG-CTHJWPIASA-N	9543795	CCCCC/C=C\C/C=C\C/C=C\CCCCCCC(=O)O[C@@H](CO)COC(=O)CCCCCCC/C=C\C/C=C\C/C=C\CC	0.586649	1.14704
DG 40:1	VFUWCRMMTRWZAT-JLDYGAOKSA-N	9543793	CCCCCCCCCCCCCCCCCCCC(=O)OC[C@H](CO)OC(=O)CCCCCCCCC/C=C\CCCCCCCC	0.1786	0.879828
FA 16:0	IPCSVZSSVZVIGE-UHFFFAOYSA-N	985	CCCCCCCCCCCCCCCC(=O)O	0.0242769	0.82511
FA 16:1	SECPZKHBENQXJG-FPLPWBNLSA-N	445638	CCCCCC/C=C\CCCCCCCC(=O)O	0.0102633	0.522461
FA 18:0	QIQXTHQIDYTFRH-UHFFFAOYSA-N	5281	CCCCCCCCCCCCCCCCCC(=O)O	0.482621	0.912815
FA 18:1	ZQPPMHVWECSIRJ-KTKRTIGZSA-N	445639	CCCCCCCC/C=C\CCCCCCCC(=O)O	0.000752954	0.555962
FA 22:4	TWSWSIQAPQLDBP-DOFZRALJSA-N	5497181	CCCCC/C=C\C/C=C\C/C=C\C/C=C\CCCCCC(=O)O	0.152694	0.854083
GlcCer d18:1/22:0	YIGARKIIFOHVPF-YAEABVQUSA-N	6321359	CCCCCCCCCCCCCCCCCCCCCC(=O)N[C@@H](CO[C@H]1C(C([C@@H]([C@H](O1)CO)O)O)O)[C@@H](/C=C/CCCCCCCCCCCCC)O	0.016411	0.824295
GlcCer d18:1/24:0	POQRWMRXUOPCLD-AAAFHMTMSA-N	6321361	CCCCCCCCCCCCCCCCCCCCCCCC(=O)N[C@@H](CO[C@H]1C(C([C@@H]([C@H](O1)CO)O)O)O)[C@@H](/C=C/CCCCCCCCCCCCC)O	0.00673288	0.819384
GlcCer d18:1/24:1	WBOZIXHPUPAOIA-RBELZSLISA-N	6321360	CCCCCCCCCCCCC/C=C/[C@H]([C@H](CO[C@H]1C(C([C@@H]([C@H](O1)CO)O)O)O)NC(=O)CCCCCCCCCCCCC/C=C\CCCCCCCC)O	5.23095e-05	0.635149
LPC 18:0	IHNKQIMGVNPMTC-RUZDIDTESA-N	497299	CCCCCCCCCCCCCCCCCC(=O)OC[C@H](COP(=O)([O-])OCC[N+](C)(C)C)O	0.71631	1.0413
LPC 18:1	YAMUFBLWGFFICM-PTGWMXDISA-N	16081932	CCCCCCCC/C=C\CCCCCCCC(=O)OC[C@H](COP(=O)([O-])OCC[N+](C)(C)C)O	0.2774	0.896483
LPC 18:2	SPJFYYJXNPEZDW-FTJOPAKQSA-N	11005824	CCCCC/C=C\C/C=C\CCCCCCCC(=O)OC[C@H](COP(=O)([O-])OCC[N+](C)(C)C)O	0.353485	0.879869
LPC 20:0	UATOAILWGVYRQS-HHHXNRCGSA-N	24779473	CCCCCCCCCCCCCCCCCCCC(=O)OC[C@H](COP(=O)([O-])OCC[N+](C)(C)C)O	0.389801	0.908814
LPC 20:1	GJTDRNFWIDPARY-GTPZACKGSA-N	24779475	CCCCCCCCCC/C=C\CCCCCCCC(=O)OC[C@H](COP(=O)([O-])OCC[N+](C)(C)C)O	0.012442	0.755502
LPC 20:2	YYQVCMMXPIJVHY-ZOIJLGJPSA-N	52924053	CCCCC/C=C\C/C=C\CCCCCCCCCC(=O)OC[C@H](COP(=O)([O-])OCC[N+](C)(C)C)O	0.378893	0.89319
LPE 18:0	BBYWOYAFBUOUFP-JOCHJYFZSA-N	46891690	CCCCCCCCCCCCCCCCCC(=O)OC[C@H](COP(=O)([O-])OCC[NH3+])O	0.0140257	1.38769
LPE 18:2	DBHKHNGBVGWQJE-USWSLJGRSA-N	52925130	CCCCC/C=C\C/C=C\CCCCCCCC(=O)OC[C@H](COP(=O)(O)OCCN)O	0.927113	0.976231
LPE 20:0	HEQMDGOBDIGJOC-XMMPIXPASA-N	52925131	CCCCCCCCCCCCCCCCCCCC(=O)OC[C@H](COP(=O)(O)OCCN)O	0.288974	1.02613
LPE 20:1	JEAGLCKGAKACCE-OPSAWKISSA-N	52925139	CCCCCCCC/C=C\CCCCCCCCCC(=O)OC[C@H](COP(=O)(O)OCCN)O	0.0890456	0.848826
PC 16:0/16:0	KILNVBDSWZSGLL-KXQOOQHDSA-N	452110	CCCCCCCCCCCCCCCC(=O)OC[C@H](COP(=O)([O-])OCC[N+](C)(C)C)OC(=O)CCCCCCCCCCCCCCC	0.00238323	0.829044
PC 18:1/16:0	WTJKGGKOPKCXLL-VYOBOKEXSA-N	5497103	CCCCCCCCCCCCCCCC(=O)OC[C@H](COP(=O)([O-])OCC[N+](C)(C)C)OC(=O)CCCCCCC/C=C\CCCCCCCC	0.309127	0.960467
PC 28:0	CITHEXJVPOWHKC-UUWRZZSWSA-N	5459377	CCCCCCCCCCCCCC(=O)OC[C@H](COP(=O)([O-])OCC[N+](C)(C)C)OC(=O)CCCCCCCCCCCCC	0.792789	0.939846
PC 30:0	RFVFQQWKPSOBED-PSXMRANNSA-N	129657	CCCCCCCCCCCCCCCC(=O)O[C@H](COC(=O)CCCCCCCCCCCCC)COP(=O)([O-])OCC[N+](C)(C)C	0.965195	0.990236
PC 32:1	QIBZFHLFHCIUOT-NPBIGWJUSA-N	6443788	CCCCCCCCCCCCCCCC(=O)OC[C@H](COP(=O)([O-])OCC[N+](C)(C)C)OC(=O)CCCCCCC/C=C\CCCCCC	0.951551	1.01247
PC 32:2	GPWHCUUIQMGELX-VHQDNGOZSA-N	24778764	CCCCCC/C=C\CCCCCCCC(=O)OC[C@H](COP(=O)([O-])OCC[N+](C)(C)C)OC(=O)CCCCCCC/C=C\CCCCCC	0.000808336	1.45368
PC 32:3	UXEFXNOSLOCOLX-ZCHSEWAGSA-N	52922763	CCCCCCCCCCCCCC(=O)O[C@H](COC(=O)CCCC/C=C\C/C=C\C/C=C\CCCCC)COP(=O)([O-])OCC[N+](C)(C)C	0.470385	0.897017
PC 33:1	GXTATYLPYLLNLV-MGIDVFSBSA-N	24778662	CCCCCCCCCCCCCCC(=O)OC[C@H](COP(=O)([O-])OCC[N+](C)(C)C)OC(=O)CCCCCCCCC/C=C\CCCCCC	0.000316931	1.42688
PC 34:0	PZNPLUBHRSSFHT-RRHRGVEJSA-N	24778686	CCCCCCCCCCCCCCCCCC(=O)O[C@H](COC(=O)CCCCCCCCCCCCCCC)COP(=O)([O-])OCC[N+](C)(C)C	0.00380622	0.750195
PC 34:2	JLPULHDHAOZNQI-ZTIMHPMXSA-N	5287971	CCCCCCCCCCCCCCCC(=O)OC[C@H](COP(=O)([O-])OCC[N+](C)(C)C)OC(=O)CCCCCCC/C=C\C/C=C\CCCCC	0.153129	1.03723
PC 34:3	CNNSEHUKQJCGTE-UPPWDXJYSA-N	24778699	CCCCCCCCCCCCCCCC(=O)OC[C@H](COP(=O)([O-])OCC[N+](C)(C)C)OC(=O)CCCC/C=C\C/C=C\C/C=C\CCCCC	0.0134751	1.32123
PC 35:2	ZSKWZJYUVZYDQU-WESJWMGVSA-N	52922491	CCCCCCCCCCCCCCCCC(=O)OC[C@H](COP(=O)([O-])OCC[N+](C)(C)C)OC(=O)CCCCCCC/C=C\C/C=C\CCCCC	2.19662e-07	1.4502
PC 36:0	NRJAVPSFFCBXDT-HUESYALOSA-N	94190	CCCCCCCCCCCCCCCCCC(=O)OC[C@H](COP(=O)([O-])OCC[N+](C)(C)C)OC(=O)CCCCCCCCCCCCCCCCC	0.199282	1.12626
PC 36:1	ATHVAWFAEPLPPQ-VRDBWYNSSA-N	24778825	CCCCCCCCCCCCCCCCCC(=O)OC[C@H](COP(=O)([O-])OCC[N+](C)(C)C)OC(=O)CCCCCCC/C=C\CCCCCCCC	0.298651	0.908792
PC 36:2	SNKAWJBJQDLSFF-NVKMUCNASA-N	10350317	CCCCCCCC/C=C\CCCCCCCC(=O)OC[C@H](COP(=O)([O-])OCC[N+](C)(C)C)OC(=O)CCCCCCC/C=C\CCCCCCCC	0.975626	0.998742
PC 36:3	BXRLDROZWDUSGM-ZRYFCQOPSA-N	24778937	CCCCCCCC/C=C\CCCCCCCC(=O)OC[C@H](COP(=O)([O-])OCC[N+](C)(C)C)OC(=O)CCCC/C=C\C/C=C\CCCCCCCC	0.184792	1.08511
PC 36:4	IIZPXYDJLKNOIY-JXPKJXOSSA-N	10747814	CCCCCCCCCCCCCCCC(=O)OC[C@H](COP(=O)([O-])OCC[N+](C)(C)C)OC(=O)CCC/C=C\C/C=C\C/C=C\C/C=C\CCCCC	0.771712	1.0127
PC 36:5	DYDDZDMJSQYFGN-OIVUZXIWSA-N	24778771	CCCCCC/C=C\CCCCCCCC(=O)OC[C@H](COP(=O)([O-])OCC[N+](C)(C)C)OC(=O)CCC/C=C\C/C=C\C/C=C\C/C=C\CCCCC	0.611283	0.989161
PC 36:6	SPWBDEZMKCRQSX-NGPPOSSDSA-N	52922847	CCCCC/C=C\C/C=C\C/C=C\CCCCC(=O)O[C@H](COC(=O)CCCCCCC/C=C\C/C=C\C/C=C\CC)COP(=O)([O-])OCC[N+](C)(C)C	0.827189	0.963452
PC 37:2	MCZUABDVGPPWPM-HJTCUGKVSA-N	52922735	CCCCCCCCCCCCCCCCCCC(=O)O[C@H](COC(=O)CCCCCCC/C=C\C/C=C\CCCCC)COP(=O)([O-])OCC[N+](C)(C)C	0.00424244	1.23513
PC 37:3	OOYQEEUUQRMQKL-JUUDQZDJSA-N	52922851	CCCCCCCCCCCCCCCCCCC(=O)O[C@H](COC(=O)CCCCCCC/C=C\C/C=C\C/C=C\CC)COP(=O)([O-])OCC[N+](C)(C)C	0.00963394	1.40593
PC 37:4	QRPUCJXFPYFTMB-FBFLODOBSA-N	52922853	CCCCCCCCC/C=C\CCCCCCCC(=O)O[C@H](COC(=O)CCCCCCC/C=C\C/C=C\C/C=C\CC)COP(=O)([O-])OCC[N+](C)(C)C	0.00786748	1.24324
PC 38:2	KXXLFCAPKGRXBT-FMJYHZMHSA-N	24779263	CCCCCCCCCCCCCCCCCCCC(=O)OC[C@H](COP(=O)([O-])OCC[N+](C)(C)C)OC(=O)CCCCCCC/C=C\C/C=C\CCCCC	0.259831	0.904123
PC 38:3	OJHJKEBRZSDTTL-VHWCKNCUSA-N	52922741	CCCCCCCC/C=C\CCCCCCCCCC(=O)O[C@H](COC(=O)CCCCCCC/C=C\C/C=C\CCCCC)COP(=O)([O-])OCC[N+](C)(C)C	0.650572	1.0995
PC 38:4	DNYKSJQVBCVGOF-LCKGXUDJSA-N	52923291	CCCCCCCCCCCCCCCCCC(=O)O[C@H](COC(=O)CCC/C=C\C/C=C\C/C=C\C/C=C\CCCCC)COP(=O)([O-])OCC[N+](C)(C)C	0.342904	0.936964
PC 38:5	YLWBKBDNHWQEFU-YJXJLLHLSA-N	53479033	CCCCCC/C=C\CCCCCCCCCC(=O)O[C@H](COC(=O)CCC/C=C\C/C=C\C/C=C\C/C=C\CCCCC)COP(=O)([O-])OCC[N+](C)(C)C	0.377555	1.19331
PC 38:6	PLZBTDKJYHXIEW-DZUXOTHRSA-N	52923295	CCCCC/C=C\C/C=C\CCCCCCCC(=O)O[C@H](COC(=O)CCC/C=C\C/C=C\C/C=C\C/C=C\CCCCC)COP(=O)([O-])OCC[N+](C)(C)C	2.71125e-10	0.632764
PC 38:8	QQNHCRBGLPDWEW-LRFGEVPTSA-N	52922865	CC/C=C\C/C=C\C/C=C\CCCCCCCC(=O)OC[C@H](COP(=O)([O-])OCC[N+](C)(C)C)OC(=O)CCC/C=C\C/C=C\C/C=C\C/C=C\C/C=C\CC	0.523556	0.843516
PC 40:2	AEUCYCQYAUFAKH-DITNKEBASA-N	24779063	CCCCCCCC/C=C\CCCCCCCCCC(=O)OC[C@H](COP(=O)([O-])OCC[N+](C)(C)C)OC(=O)CCCCCCCCC/C=C\CCCCCCCC	0.0311801	0.803584
PC 40:5	LJFKFKIYUJNFPZ-ZLFSCUDPSA-N	52923133	CCCCCCCC/C=C\CCCCCCCCCC(=O)OC[C@H](COP(=O)([O-])OCC[N+](C)(C)C)OC(=O)CCC/C=C\C/C=C\C/C=C\C/C=C\CCCCC	4.01213e-09	0.505872
PC 40:6	TYRTWVKQVGNGSZ-RGBTVBCDSA-N	52923195	CCCCC/C=C\C/C=C\CCCCCCCCCC(=O)OC[C@H](COP(=O)([O-])OCC[N+](C)(C)C)OC(=O)CCC/C=C\C/C=C\C/C=C\C/C=C\CCCCC	0.00264431	0.709925
PC 40:7	BPUROMFCPFGBOT-ZEGPSQTJSA-N	24778982	CCCCC/C=C\C/C=C\CCCCCCCC(=O)OC[C@H](COP(=O)([O-])OCC[N+](C)(C)C)OC(=O)CC/C=C\C/C=C\C/C=C\C/C=C\C/C=C\CCCCC	0.0380943	0.822668
PC 42:1	PAHPUCKPYBHMBM-RURDTVAGSA-N	24778881	CCCCCCCCCCCCCCCCCC(=O)OC[C@H](COP(=O)([O-])OCC[N+](C)(C)C)OC(=O)CCCCCCCCCCCCC/C=C\CCCCCCCC	0.616487	0.948589
PC 42:4	SGYNBRXEOXADHS-CIUHTZMDSA-N	24779052	CCCCCCCCCCCCCCCCCCCC(=O)OC[C@H](COP(=O)([O-])OCC[N+](C)(C)C)OC(=O)CCCCC/C=C\C/C=C\C/C=C\C/C=C\C/C=C\CC	0.970562	0.994973
PC 42:6	DSVRMAGYENFTLY-GDDYDVMSSA-N	52923651	CCCCC/C=C\C/C=C\CCCCCCCCCC(=O)O[C@H](COC(=O)CCCCC/C=C\C/C=C\C/C=C\C/C=C\CCCCC)COP(=O)([O-])OCC[N+](C)(C)C	0.000519703	1.6513
PC 44:3	GZZUNXHFXFGEBB-MXZPZXETSA-N	52923541	CCCCCCCCCC/C=C\CCCCCCCCCC(=O)OC[C@H](COP(=O)([O-])OCC[N+](C)(C)C)OC(=O)CCCCCCCCCCC/C=C\C/C=C\CCCCC	0.000162493	0.719859
PC 44:4	UIAAGLPOUUFIRG-ZUEQPGPOSA-N	52923481	CCCCCCCCCCCCCCCCCCCCCC(=O)OC[C@H](COP(=O)([O-])OCC[N+](C)(C)C)OC(=O)CCCCC/C=C\C/C=C\C/C=C\C/C=C\CCCCC	0.0150741	0.828886
PC p34:1	OIICTMOQBYZCDA-IIKIFWEUSA-N	11125520	CCCCCCCCCCCCCCCC/C=C\OC[C@H](COP(=O)([O-])OCC[N+](C)(C)C)OC(=O)CCCCCCCCCCCCCCC	6.5981e-05	0.765203
PC p34:2	KMNVIRCHUMQGHD-RCINKDPXSA-N	52923934	CCCCCCCCCCCCCCCC/C=C\OC[C@H](COP(=O)([O-])OCC[N+](C)(C)C)OC(=O)CCCCCCC/C=C\CCCCCC	2.92823e-05	0.748533
PC p34:3	QLEHHUPUHJPURI-PWYDUFMYSA-N	24779386	CCCCCCCCCCCCCC/C=C\OC[C@H](COP(=O)([O-])OCC[N+](C)(C)C)OC(=O)CCCCCCC/C=C\C/C=C\CCCCC	0.128064	1.16626
PC p36:3	SOUZQPFUXRVDGK-KCTKZSJBSA-N	53481701	CCCCCCCCCCCCCCCCOC[C@H](COP(=O)([O-])OCC[N+](C)(C)C)OC(=O)CCCCCC/C=C\C/C=C\C/C=C\C/C=C\CC	0.95428	0.993294
PC p36:4	IOYKZPNDXIIXLN-LOQSCQKMSA-N	24779388	CCCCCCCCCCCCCC/C=C\OC[C@H](COP(=O)([O-])OCC[N+](C)(C)C)OC(=O)CCC/C=C\C/C=C\C/C=C\C/C=C\CCCCC	0.00424244	0.812224
PC p38:3	WOSDZWBQBJHAMR-NOQLVGMBSA-N	52925093	CCCCCCCCCCCCCCCC/C=C\OC[C@H](COP(=O)(O)OCCN)OC(=O)CCCCCCCCCCC/C=C\C/C=C\CCCCC	0.586665	1.0719
PC p38:4	BAKDTVUHENQVRW-IXXGCMLPSA-N	52925117	CCCCCCCCCCCCCCCCCC/C=C\OC[C@H](COP(=O)(O)OCCN)OC(=O)CCCCCC/C=C\C/C=C\C/C=C\CCCCC	0.00607348	0.831865
PE 34:2	HBZNVZIRJWODIB-NHCUFCNUSA-N	46891780	CCCCCCCCCCCCCCCC(=O)OC[C@H](COP(=O)([O-])OCC[NH3+])OC(=O)CCCCCCC/C=C\C/C=C\CCCCC	0.0380943	1.4108
PE 36:2	DXXUYBAISOHOLM-XRIXOMQFSA-N	52924894	CCCCCCCCCCCCCCCCCC(=O)O[C@H](COC(=O)CCCCCCC/C=C\C/C=C\CCCCC)COP(=O)(O)OCCN	1.20661e-08	1.87465
PE 36:3	GKAFCSRKMWFPSJ-RJXNKANHSA-N	71728379	CCCCCCCC/C=C\CCCCCCCC(=O)OC[C@H](COP(=O)([O-])OCC[NH3+])OC(=O)CCCCCCC/C=C\C/C=C\CCCCC	0.771712	1.02427
PE 36:4	DUQDVNACTOXOJA-KTKXOIIHSA-N	52924875	CCCCCCCCCCCCCCCC(=O)O[C@H](COC(=O)CCC/C=C\C/C=C\C/C=C\C/C=C\CCCCC)COP(=O)(O)OCCN	0.55888	1.09049
PE 38:2	CLPMAPXZURYSNH-CNBLIUODSA-N	9546825	CCCCCCCCCCCCCCCCCCCC(=O)OC[C@H](COP(=O)(O)OCCN)OC(=O)CCCCCCC/C=C\C/C=C\CCCCC	1.58598e-05	1.39803
PE 38:4	ANRKEHNWXKCXDB-BHFWLYLHSA-N	46891781	CCCCCCCCCCCCCCCCCC(=O)OC[C@H](COP(=O)([O-])OCC[NH3+])OC(=O)CCC/C=C\C/C=C\C/C=C\C/C=C\CCCCC	0.0270752	1.3073
PE 38:6	LFGBKOUQHCWBQI-BZGLIJSBSA-N	52924893	CCCCC/C=C\C/C=C\CCCCCCCC(=O)OC[C@H](COP(=O)(O)OCCN)OC(=O)CCC/C=C\C/C=C\C/C=C\C/C=C\CCCCC	0.00603309	0.714391
PE 40:6	FEABWDMFZNBFCT-KUVQHVNNSA-N	52924379	CCCCC/C=C\C/C=C\CCCCCCCC(=O)OC[C@H](COP(=O)(O)OCCN)OC(=O)CCCCC/C=C\C/C=C\C/C=C\C/C=C\CCCCC	4.01213e-09	0.656578
Phosphatidylglycerol 29:0	RYHJACYQTJIGMZ-JHOUSYSJSA-N	52926457	CCCCCCCCCCCCCCCC(=O)OC[C@H](COP(=O)(O)OC[C@H](CO)O)OC(=O)CCCCCCCCCCCC	0.965195	1.00212
Plasmenyl-PC 34:2	IQACMFWAGALEAQ-WESJWMGVSA-N	6443157	CCCCCCCCCCCCCCCCOC[C@H](COP(=O)([O-])OCC[N+](C)(C)C)OC(=O)CCCCCCC/C=C\C/C=C\CCCCC	0.0662717	1.20906
Plasmenyl-PC 36:6	JCIBOIAZHLGPOT-YAYDGDQKSA-N	70698851	CCCCCC/C=C\CCCCCCCC/C=C\O[C@H](COC(=O)CCCC/C=C\C/C=C\C/C=C\C/C=C\CC)COP(=O)([O-])OCC[N+](C)(C)C	0.230468	1.11827
Plasmenyl-PC 38:5	FHHVIBPVBBRLOR-IYACIECVSA-N	24779390	CCCCCCCCCCCCCCCC/C=C\OC[C@H](COP(=O)([O-])OCC[N+](C)(C)C)OC(=O)CCC/C=C\C/C=C\C/C=C\C/C=C\CCCCC	0.817116	0.968915
Plasmenyl-PE 36:3	XVXISDREVDGQPX-PISDLAQISA-N	52925079	CCCCCCCCCCCCCCCC/C=C\OC[C@H](COP(=O)(O)OCCN)OC(=O)CCCCCCC/C=C\C/C=C\CCCCC	0.049024	1.21516
Plasmenyl-PE 36:5	UUYSKERSKRMYME-MAIXUNBTSA-N	52925126	CCCCCCCCCCCCCC/C=C\OC[C@H](COP(=O)(O)OCCN)OC(=O)CCC/C=C\C/C=C\C/C=C\C/C=C\CCCCC	0.0091966	0.752016
Plasmenyl-PE 36:6	RLLOITCRNQRGJD-DFAKUSJGSA-N	52925061	CCCCCCCCCCCCCC/C=C\OC[C@H](COP(=O)(O)OCCN)OC(=O)CCC/C=C\C/C=C\C/C=C\C/C=C\C/C=C\CC	0.00396034	0.513961
Plasmenyl-PE 38:5	URPXXNCTXCOATD-FXMFQVEGSA-N	86289532	CCCCCCCCCCCCCCCC/C=C\OC[C@H](COP(=O)([O-])OCC[NH3+])OC(=O)CCC/C=C\C/C=C\C/C=C\C/C=C\CCCCC	0.000921755	0.693715
Plasmenyl-PE 38:6	KCNBSSYOJRUKOM-JALPNNRCSA-N	52925089	CCCCCCCCCCCCCCCC/C=C\OC[C@H](COP(=O)(O)OCCN)OC(=O)CCC/C=C\C/C=C\C/C=C\C/C=C\C/C=C\CC	6.5981e-05	0.617893
Plasmenyl-PE 38:7	WVGALBKSWOUIEZ-XNHMFJFDSA-N	5283497	CCCCCCCCCCCCCC/C=C\OC[C@H](COP(=O)(O)OCCN)OC(=O)CC/C=C\C/C=C\C/C=C\C/C=C\C/C=C\C/C=C\CC	1.07099e-12	0.418126
Plasmenyl-PE 40:6	CVCZYWPCMUWTNS-IXKBFPPMSA-N	52925119	CCCCCCCCCCCCCCCCCC/C=C\OC[C@H](COP(=O)(O)OCCN)OC(=O)CCC/C=C\C/C=C\C/C=C\C/C=C\C/C=C\CC	0.134586	0.730958
Plasmenyl-PE 40:7	FIJFPUAJUDAZEY-MNDXXDKYSA-N	42607458	CCCCCCCCCCCCCCCC/C=C\OC[C@H](COP(=O)(O)OCCN)OC(=O)CC/C=C\C/C=C\C/C=C\C/C=C\C/C=C\C/C=C\CC	3.70954e-08	0.48299
PS 38:3	BQBTWCBZEKRLFP-BGFRNLFWSA-N	52925523	CCCCCCCCCCCCCCCCCCCC(=O)O[C@H](COC(=O)CCCCCCC/C=C\C/C=C\C/C=C\CC)COP(=O)(O)OC[C@@H](C(=O)O)N	0.961195	1.00269
PS 38:4	SVOUGFFDROZBJI-DNALCEECSA-N	24779545	CCCCCCCCCCCCCCCCCC(=O)OC[C@H](COP(=O)(O)OC[C@@H](C(=O)O)N)OC(=O)CCC/C=C\C/C=C\C/C=C\C/C=C\CCCCC	0.445852	0.982833
PS 40:3	BTIQFPURPAGQHS-HOSNKBABSA-N	52925502	CCCCCCCCCCCCCCCCCCCCCC(=O)O[C@H](COC(=O)CCCC/C=C\C/C=C\C/C=C\CCCCC)COP(=O)(O)OC[C@@H](C(=O)O)N	0.482621	0.942043
PS 40:4	GBBNRADSWUALEU-AEDAHVLISA-N	52925748	CCCCCCCCCCCCCCCCCCCC(=O)O[C@H](COC(=O)CCC/C=C\C/C=C\C/C=C\C/C=C\CCCCC)COP(=O)(O)OC[C@@H](C(=O)O)N	0.665254	1.01098
PS 40:6	LYYHRRPTEXPVOR-SYEOQEKUSA-N	24779546	CCCCCCCCCCCCCCCCCC(=O)OC[C@H](COP(=O)(O)OC[C@@H](C(=O)O)N)OC(=O)CC/C=C\C/C=C\C/C=C\C/C=C\C/C=C\C/C=C\CC	0.801927	0.975494
PS 42:5	VNQACVFLMLYTLE-WDLXSBMRSA-N	52925755	CCCCCCCCCC/C=C\CCCCCCCCCC(=O)O[C@H](COC(=O)CCC/C=C\C/C=C\C/C=C\C/C=C\CCCCC)COP(=O)(O)OC[C@@H](C(=O)O)N	0.259831	1.1052
PS 42:6	WOBFEYJLJCLDBR-NISVGTQTSA-N	52925756	CCCCC/C=C\C/C=C\CCCCCCCCCCCC(=O)O[C@H](COC(=O)CCC/C=C\C/C=C\C/C=C\C/C=C\CCCCC)COP(=O)(O)OC[C@@H](C(=O)O)N	0.128064	0.909057
PS 42:8	ROCNHMAZFKRILY-PRDJOCNNSA-N	52925757	CCCCC/C=C\C/C=C\C/C=C\C/C=C\CCCCCC(=O)O[C@H](COC(=O)CCC/C=C\C/C=C\C/C=C\C/C=C\CCCCC)COP(=O)(O)OC[C@@H](C(=O)O)N	0.000209101	0.599918
PS p34:0	OHPHIZCKAAJKOG-PBSRCHRYSA-N	52926194	CCCCCCCCCCCCCCCCCC(=O)O[C@H](CO/C=C\CCCCCCCCCCCCCC)COP(=O)(O)OC[C@@H](C(=O)O)N	0.629944	1.05488
SM 33:1	LQINJRUGTUOHGS-YPDYIYJKSA-N	52931139	CCCCCCCCCCCCCCC(=O)N[C@@H](COP(=O)([O-])OCC[N+](C)(C)C)[C@@H](/C=C/CCCCCCCCCCCCC)O	0.975626	1.00298
SM 34:0	QHZIGNLCLJPLCU-QPPIDDCLSA-N	9939965	CCCCCCCCCCCCCCC[C@H]([C@H](COP(=O)([O-])OCC[N+](C)(C)C)NC(=O)CCCCCCCCCCCCCCC)O	0.0252217	0.801782
SM d16:1/20:0	LKQLRGMMMAHREN-YJFXYUILSA-N	6453725	CCCCCCCCCCCCCCCCCC(=O)N[C@@H](COP(=O)([O-])OCC[N+](C)(C)C)[C@@H](/C=C/CCCCCCCCCCCCC)O	4.52351e-05	0.739921
SM d16:1/20:1	NBEADXWAAWCCDG-QDDWGVBQSA-N	6443882	CCCCCCCCCCCCC/C=C/[C@H]([C@H](COP(=O)([O-])OCC[N+](C)(C)C)NC(=O)CCCCCCC/C=C\CCCCCCCC)O	0.01264	0.84254
SM d18:1/14:0	KYICBZWZQPCUMO-PSALXKTOSA-N	11433862	CCCCCCCCCCCCC/C=C/[C@H]([C@H](COP(=O)([O-])OCC[N+](C)(C)C)NC(=O)CCCCCCCCCCCCC)O	0.0260568	0.81947
SM d18:1/16:0	RWKUXQNLWDTSLO-GWQJGLRPSA-N	9939941	CCCCCCCCCCCCCCCC(=O)N[C@@H](COP(=O)([O-])OCC[N+](C)(C)C)[C@@H](/C=C/CCCCCCCCCCCCC)O	0.138751	0.935792
SM d18:1/16:1	YLWSJLLZUHSIEA-CKSUKHGVSA-N	52931235	CCCCCCCCCCCCCCCC(=O)N[C@@H](COP(=O)([O-])OCC[N+](C)(C)C)[C@@H](/C=C/CCCCCCCC/C=C\CCC)O	0.0153204	0.882562
SM d18:1/20:0	AADLTHQNYQJHQV-SVLGDMRNSA-N	44260124	CCCCCCCCCCCCCCCCCCCC(=O)N[C@@H](COP(=O)([O-])OCC[N+](C)(C)C)[C@@H](/C=C/CCCCCCCCCCCCC)O	0.000122603	0.77328
SM (d18:1/20:1)	MDRFMTLYKHBJTF-NQYLGBTJSA-N	52931179	CCCCCCCCCCCCC/C=C/[C@H]([C@H](COP(=O)([O-])OCC[N+](C)(C)C)NC(=O)CCCCCCCCC/C=C\CCCCCCCC)O	0.00385386	0.84286
SM d18:1/21:0	YXSZOBWVQJIWNE-QVDCKBILSA-N	52931193	CCCCCCCCCCCCCCCCCCCCC(=O)N[C@@H](COP(=O)([O-])OCC[N+](C)(C)C)[C@@H](/C=C/CCCCCCCCCCCCC)O	0.479021	1.08376
SM d18:1/22:0	FJJANLYCZUNFSE-TWKUQIQBSA-N	44260125	CCCCCCCCCCCCCCCCCCCCCC(=O)N[C@@H](COP(=O)([O-])OCC[N+](C)(C)C)[C@@H](/C=C/CCCCCCCCCCCCC)O	0.937122	0.992101
SM d18:1/23:0	SXZWBNWTCVLZJN-NMIJJABPSA-N	46891684	CCCCCCCCCCCCCCCCCCCCCCC(=O)N[C@@H](COP(=O)([O-])OCC[N+](C)(C)C)[C@@H](/C=C/CCCCCCCCCCCCC)O	0.00163407	1.28603
SM d18:1/24:0	QEDPUVGSSDPBMD-XTAIVQBESA-N	44260127	CCCCCCCCCCCCCCCCCCCCCCCC(=O)N[C@@H](COP(=O)([O-])OCC[N+](C)(C)C)[C@@H](/C=C/CCCCCCCCCCCCC)O	0.586649	1.0397
SM d18:2/23:0	JBDGKEXQKCCQFK-JWQIMADESA-N	52931209	CCCCCCCCCCCCCCCCCCCCCCC(=O)N[C@@H](COP(=O)([O-])OCC[N+](C)(C)C)[C@@H](/C=C/CCCCCCCC/C=C\CCC)O	0.358745	1.07391
SM d18:2/24:0	DACOGJMBYLZYDH-GXJPFUDISA-N	52931217	CCCCCCCCCCCCCCCCCCCCCCCC(=O)N[C@@H](COP(=O)([O-])OCC[N+](C)(C)C)[C@@H](/C=C/CCCCCCCC/C=C\CCC)O	8.44596e-07	0.696423
SM (d18:2/24:1)	TXFLWJQVQCDUDZ-BRUGZULGSA-N	52931215	CCCCCCCC/C=C\CCCCCCCCCCCCCC(=O)N[C@@H](COP(=O)([O-])OCC[N+](C)(C)C)[C@@H](/C=C/CCCCCCCC/C=C\CCC)O	5.23095e-05	0.7865
TG 42:0	DUXYWXYOBMKGIN-UHFFFAOYSA-N	11148	CCCCCCCCCCCCCC(=O)OCC(COC(=O)CCCCCCCCCCCCC)OC(=O)CCCCCCCCCCCCC	0.503374	1.3836
TG 44:1	UZLGGKDLJGDGEY-WVSHCNQOSA-N	56936554	CCCCCCCCCCCCCC(=O)OC[C@H](COC(=O)CCCCCCC/C=C\CCCCCC)OC(=O)CCCCCCCCCCCCC	0.913319	1.08283
TG 46:0	JWVXCFSNEOMSHH-YACUFSJGSA-N	91865745	CCCCCCCCCCCCCCCC(=O)OC[C@@H](COC(=O)CCCCCCCCCCCCC)OC(=O)CCCCCCCCCCCCCCC	0.101164	1.58631
TG 46:1	RSDIQTNCDWUNDP-JHXSWNAYSA-N	56936558	CCCCCCCCCCCCCC(=O)OC[C@H](COC(=O)CCCCCCC/C=C\CCCCCCCC)OC(=O)CCCCCCCCCCCCC	0.95428	0.965896
TG 46:2	XUEMVUXNOCIHLG-MOFPORNTSA-N	56936582	CCCCCCCCCCCCCC(=O)OC[C@H](COC(=O)CCCCCCC/C=C\CCCCCC)OC(=O)CCCCCCC/C=C\CCCCCC	0.937984	1.05009
TG 46:3	AQARPXOEHQBBQN-OJJDTYCWSA-N	56936561	CCCCCCCCCCCCCC(=O)OC[C@H](COC(=O)CCCCCCC/C=C\C/C=C\C/C=C\CC)OC(=O)CCCCCCCCCCCCC	0.58693	1.23053
TG 48:0	PVNIQBQSYATKKL-UHFFFAOYSA-N	11147	CCCCCCCCCCCCCCCC(=O)OCC(COC(=O)CCCCCCCCCCCCCCC)OC(=O)CCCCCCCCCCCCCCC	0.0197172	1.57496
TG 48:1	FEKLSEFRUGWUOS-DLOIZKPKSA-N	9543986	CCCCCCCCCCCCCCCC(=O)OC[C@H](COC(=O)CCCCCCC/C=C\CCCCCC)OC(=O)CCCCCCCCCCCCCCC	0.531687	1.16078
TG 48:2	RUOVJPPUXXFZPC-YZEIBMOJSA-N	9543987	CCCCCCCCCCCCCCCC(=O)OC[C@H](COC(=O)CCCCCCC/C=C\CCCCCC)OC(=O)CCCCCCC/C=C\CCCCCC	0.623093	1.1578
TG 48:3	SKGWNZXOCSYJQL-BUTYCLJRSA-N	9543989	CCCCCC/C=C\CCCCCCCC(=O)OCC(OC(=O)CCCCCCC/C=C\CCCCCC)COC(=O)CCCCCCC/C=C\CCCCCC	0.937984	0.95298
TG 49:0	TTWJTJMWHOYBPQ-ANFMRNGASA-N	9543988	CCCCCCCCCCCCCCCCC(=O)OC[C@@H](COC(=O)CCCCCCCCCCCCCCC)OC(=O)CCCCCCCCCCCCCCC	0.00603309	2.22294
TG 49:1	VYYGQDOPVVYUKW-UKFBYESTSA-N	9543991	CCCCCCCCCCCCCCCC(=O)OC[C@H](COC(=O)CCCCCCC/C=C\CCCCCCC)OC(=O)CCCCCCCCCCCCCCC	0.01264	1.94849
TG 49:2	QZYSUBAQYSVFNX-PSMULLBHSA-N	9543993	CCCCCCCCCCCCCCCCC(=O)OC[C@@H](COC(=O)CCCCCCC/C=C\CCCCCC)OC(=O)CCCCCCC/C=C\CCCCCC	0.00603309	1.80998
TG 50:0	QRJMBNGGFSPTQP-BXJPYAOGSA-N	3246958	[2H]C([2H])(C([2H])(C([2H])([2H])OC(=O)CCCCCCCCCCCCCCC)OC(=O)CCCCCCCCCCCCCCCCC)OC(=O)CCCCCCCCCCCCCCC	0.0197172	1.90572
TG 50:1	YHMDGPZOSGBQRH-YYSBDVFPSA-N	25240460	CCCCCCCCCCCCCCCC(=O)OC[C@H](COC(=O)CCCCCCC/C=C\CCCCCCCC)OC(=O)CCCCCCCCCCCCCCC	0.626174	1.06027
TG 50:2	QEZWFCZNHWUARW-XQCAQTCHSA-N	9544010	CCCCCCCCCCCCCCCCCC(=O)OC[C@@H](COC(=O)CCCCCCC/C=C\CCCCCC)OC(=O)CCCCCCC/C=C\CCCCCC	0.650572	1.05431
TG 50:3	UFHNZOACKFBCOM-YXKNDSBASA-N	25240357	CCCCCCCC/C=C\CCCCCCCC(=O)OC[C@@H](COC(=O)CCCCCCC/C=C\CCCCCC)OC(=O)CCCCCCC/C=C\CCCCCC	0.195557	1.24622
TG 50:4	PVMBAGXWHHZKFP-JMPJWMFJSA-N	25240359	CCCCCC/C=C\CCCCCCCC(=O)OC[C@H](COC(=O)CCCCCCC/C=C\C/C=C\CCCCC)OC(=O)CCCCCCC/C=C\CCCCCC	0.346643	1.25418
TG 50:5	AFTBPUXZTDLRSP-UDQIKIEDSA-N	9544045	CCCCCC/C=C\CCCCCCCC(=O)OC[C@H](COC(=O)CCCCCCC/C=C\C/C=C\C/C=C\CC)OC(=O)CCCCCCC/C=C\CCCCCC	0.629944	1.14863
TG 51:1	OZAXLAGNPZMZAD-BOEMPQCLSA-N	9544006	CCCCCCCCCCCCCCCCC(=O)OC[C@H](COC(=O)CCCCCCC/C=C\CCCCCCC)OC(=O)CCCCCCCCCCCCCCCC	0.0396629	1.7462
TG 51:2	NSNSZGBCOIKUBU-SZOKBDNISA-N	9544013	CCCCCCCCCCCCCCCCC(=O)OC[C@H](COC(=O)CCCCCCC/C=C\CCCCCCC)OC(=O)CCCCCCC/C=C\CCCCCCC	0.0162512	1.61606
TG 51:3	ISSGPXMQOMAFMJ-DMGKHJLRSA-N	9544023	CCCCCCC/C=C\CCCCCCCC(=O)OCC(OC(=O)CCCCCCC/C=C\CCCCCCC)COC(=O)CCCCCCC/C=C\CCCCCCC	0.000384376	1.71751
TG 51:4	IIRQXNVLAXQEKB-KBEZCZBDSA-N	9544052	CCCCCCCC/C=C\CCCCCCCC(=O)OC[C@@H](COC(=O)CCCCCCC/C=C\CCCCCC)OC(=O)CCCCCCC/C=C\C/C=C\CCCC	0.000752954	1.72989
TG 52:0	SDNYRTVJOFMYIW-OIVUAWODSA-N	545690	CCCCCCCCCCCCCCCCCC(=O)OC[C@@H](COC(=O)CCCCCCCCCCCCCCC)OC(=O)CCCCCCCCCCCCCCCCC	0.0197172	2.18639
TG 52:1	NPCZZYKITFKRQZ-FQUZZJBASA-N	25240360	CCCCCCCCCCCCCCCCCC(=O)O[C@H](COC(=O)CCCCCCCCCCCCCCC)COC(=O)CCCCCCC/C=C\CCCCCCCC	0.516886	1.18485
TG 52:2	KGLAHZTWGPHKFF-RISKEULASA-N	25240361	CCCCCCCCCCCCCCCC(=O)OC[C@H](COC(=O)CCCCCCC/C=C\C/C=C\CCCCC)OC(=O)CCCCCCC/C=C\CCCCCCCC	0.751172	0.980768
TG 52:4	WHSWXEYWNPTUPW-HNJDVRDNSA-N	25240364	CCCCCCCC/C=C\CCCCCCCC(=O)O[C@H](COC(=O)CCCCCCC/C=C\CCCCCC)COC(=O)CCCCCCC/C=C\C/C=C\CCCCC	0.183789	1.16527
TG 52:5	CQZAAIKPSLHIBC-KDJOUNIJSA-N	25240366	CCCCCC/C=C\CCCCCCCC(=O)OC[C@H](COC(=O)CCCCCCC/C=C\C/C=C\CCCCC)OC(=O)CCCCCCC/C=C\C/C=C\CCCCC	0.58693	1.14426
TG 53:0	ZJUXHXMIKPSINE-IONAWPRUSA-N	9544181	CCCCCCCCCCCCCCCCCCCCC(=O)OC[C@@H](COC(=O)CCCCCCCCCCCCCCC)OC(=O)CCCCCCCCCCCCCCC	0.00385386	2.00021
TG 53:1	WWJIBIGWKGFVAQ-JNSYTQKUSA-N	9544081	CCCCCCCCCCCCCCCCCC(=O)OC[C@@H](COC(=O)CCCCCCC/C=C\CCCCCCC)OC(=O)CCCCCCCCCCCCCCCCC	0.0225563	2.00218
TG 53:2	RSINITWKVQRWSZ-RFVLVDBCSA-N	9544102	CCCCCCCCCCCCCCCCCC(=O)OC[C@@H](COC(=O)CCCCCCC/C=C\C/C=C\CCCC)OC(=O)CCCCCCCCCCCCCCCCC	0.0330281	1.56093
TG 53:3	ZNQBEJJYVJSZLM-LEDQTTRKSA-N	9544126	CCCCCCCC/C=C\CCCCCCCC(=O)OC[C@@H](COC(=O)CCCCCCC/C=C\CCCCCCC)OC(=O)CCCCCCC/C=C\CCCCCCCC	0.00385386	1.60056
TG 53:4	BMSDHYZLQWTKSQ-LSJAAEOESA-N	9544152	CCCCCCCC/C=C\CCCCCCCC(=O)OC[C@@H](COC(=O)CCCCCCC/C=C\C/C=C\CCCC)OC(=O)CCCCCCC/C=C\CCCCCCCC	0.000265842	1.62217
TG 53:5	QHYAATSKYBYSLG-BXDFBOBBSA-N	9544183	CCCCCCC/C=C\CCCCCCCC(=O)OC[C@H](COC(=O)CCCCCCC/C=C\C/C=C\CCCCC)OC(=O)CCCCCCC/C=C\C/C=C\CCCCC	0.0294722	1.52016
TG 54:0	DCXXMTOCNZCJGO-UHFFFAOYSA-N	11146	CCCCCCCCCCCCCCCCCC(=O)OCC(COC(=O)CCCCCCCCCCCCCCCCC)OC(=O)CCCCCCCCCCCCCCCCC	0.016411	1.78237
TG 54:1	YFFIQXNTTVSKJC-NZEOUKRFSA-N	16058371	CCCCCCCCCCCCCCCCCC(=O)OC[C@H](COC(=O)CCCCCCC/C=C\CCCCCCCC)OC(=O)CCCCCCCCCCCCCCCCC	0.028414	1.88761
TG 54:2	RYNHWWNZNIGDAQ-BMTCQUSZSA-N	16058372	CCCCCCCCCCCCCCCCCC(=O)OC[C@H](COC(=O)CCCCCCC/C=C\CCCCCCCC)OC(=O)CCCCCCC/C=C\CCCCCCCC	0.516886	1.15179
TG 54:3	PHYFQTYBJUILEZ-IUPFWZBJSA-N	5497163	CCCCCCCC/C=C\CCCCCCCC(=O)OCC(OC(=O)CCCCCCC/C=C\CCCCCCCC)COC(=O)CCCCCCC/C=C\CCCCCCCC	0.665254	1.05544
TG 54:4	BRLGHZXETDWABO-NOFIOOQLSA-N	9544255	CCCCCCCCCCCCCCCCCC(=O)OC[C@H](COC(=O)CCCCCCC/C=C\C/C=C\C/C=C\CC)OC(=O)CCCCCCC/C=C\CCCCCCCC	0.445852	1.15199
TG 54:5	VVEBTVMJPTZDHO-YQFZQLSNSA-N	25240373	CCCCCCCC/C=C\CCCCCCCC(=O)OC[C@H](COC(=O)CCCCCCC/C=C\C/C=C\CCCCC)OC(=O)CCCCCCC/C=C\C/C=C\CCCCC	0.720864	1.06717
TG 54:6	HBOQXIRUPVQLKX-BBWANDEASA-N	5322095	CCCCC/C=C\C/C=C\CCCCCCCC(=O)OCC(OC(=O)CCCCCCC/C=C\C/C=C\CCCCC)COC(=O)CCCCCCC/C=C\C/C=C\CCCCC	0.444802	1.26042
TG 54:8	BMPVTDWOWBNPJU-NYRSPQLFSA-N	9544413	CCCCC/C=C\C/C=C\C/C=C\C/C=C\CCCC(=O)OC[C@@H](COC(=O)CCCCCCC/C=C\C/C=C\CCCC)OC(=O)CCCCCCC/C=C\C/C=C\CCCC	0.983551	1.00712
TG 56:1	OCYFAHIHWCVZKS-FHSLLVMSSA-N	9544345	CCCCCCCCCCCCCCCCCCCC(=O)OC[C@@H](COC(=O)CCCCCCCCCCCCCCCCC)OC(=O)CCCCCCC/C=C\CCCCCCCC	0.193892	1.4585
TG 56:2	PDEQUPGHMOMBFC-FYEHETCMSA-N	9544390	CCCCCCCCCCCCCCCCCCCC(=O)OC[C@@H](COC(=O)CCCCCCCCCCCCCCCCC)OC(=O)CCCCCCC/C=C\C/C=C\CCCCC	0.586649	1.20864
TG 56:3	QXMHHXQBBKDSSL-BAQZNRHJSA-N	9544447	CCCCCCCC/C=C\CCCCCCCCCC(=O)OC[C@@H](COC(=O)CCCCCCC/C=C\CCCCCCCC)OC(=O)CCCCCCC/C=C\CCCCCCCC	0.720864	0.896008
TG 56:4	YONCDTJKIZDSKQ-IYASBODOSA-N	25240379	CCCCCCCC/C=C\CCCCCCCCCC(=O)OC[C@@H](COC(=O)CCCCCCC/C=C\CCCCCCCC)OC(=O)CCCCCCC/C=C\C/C=C\CCCCC	0.767674	1.07948
TG 56:5	UHEJWASONFIROS-YPSHDQQVSA-N	25240380	CCCCCCCC/C=C\CCCCCCCCCC(=O)OC[C@@H](COC(=O)CCCCCCC/C=C\C/C=C\CCCCC)OC(=O)CCCCCCC/C=C\C/C=C\CCCCC	0.345326	0.839326
TG 56:6	ZTNDRFCABXFVMY-WJTCTALZSA-N	9544625	CCCCC/C=C\C/C=C\CCCCCCCCCC(=O)OC[C@@H](COC(=O)CCCCCCC/C=C\C/C=C\CCCCC)OC(=O)CCCCCCC/C=C\C/C=C\CCCCC	0.975626	0.990971
TG 56:7	DODZUDCYRVWEOJ-GKZBLMSTSA-N	9544695	CCCCC/C=C\C/C=C\CCCCCCCC(=O)OC[C@H](COC(=O)CCCCCC/C=C\C/C=C\C/C=C\CCCCC)OC(=O)CCCCCCC/C=C\C/C=C\CCCCC	0.000519703	0.618295
TG 56:8	UBGUHMDKBGQUND-VPFWBQFRSA-N	9544762	CCCCCCCCCCCCCCCC(=O)OC[C@H](COC(=O)CCC/C=C\C/C=C\C/C=C\C/C=C\CCCCC)OC(=O)CCC/C=C\C/C=C\C/C=C\C/C=C\CCCCC	0.000246621	0.469532
TG 58:1	OWZMHFAFGQCCNI-FBXRAONGSA-N	25240381	CCCCCCCCCCCCCCCCCCCC(=O)OC[C@@H](COC(=O)CCCCCCC/C=C\CCCCCCCC)OC(=O)CCCCCCCCCCCCCCCCCCC	0.0656601	1.60338
TG 58:2	GXWBCAVCOMAOHT-VMCJOIRWSA-N	9545277	CCCCC/C=C\C/C=C\CCCCCCCC(=O)OC[C@H](COC(=O)CCC/C=C\C/C=C\C/C=C\C/C=C\CCCCC)OC(=O)CCC/C=C\C/C=C\C/C=C\C/C=C\CCCCC	0.578287	1.18878
TG 58:3	RFMSTHTUAZETPD-JJPHLYBUSA-N	9544748	CCCCCCCC/C=C\CCCCCCCCCC(=O)OC[C@@H](COC(=O)CCCCCCC/C=C\CCCCCCCC)OC(=O)CCCCCCCCC/C=C\CCCCCCCC	0.470332	1.29834
TG 58:4	CCKRHDUCFMOBKX-AAINFQTBSA-N	9544835	CCCCCCCCCCCCCCCCCCCC(=O)O[C@H](COC(=O)CCCCCCCCCCCCCCCCC)COC(=O)CCC/C=C\C/C=C\C/C=C\C/C=C\CCCCC	0.792789	0.914042
TG 58:6	GSNFRUMSEHHPSY-LCXCSEBNSA-N	9544977	CCCCCCCC/C=C\CCCCCCCCCC(=O)O[C@H](COC(=O)CCCCCCC/C=C\CCCCCCCC)COC(=O)CCC/C=C\C/C=C\C/C=C\C/C=C\CCCCC	0.628209	0.880105
TG 58:8	KWIGMCRWEINBIR-HUPVKWKYSA-N	9545124	CCCCCCCCCCCCCCCCCC(=O)OC[C@H](COC(=O)CCC/C=C\C/C=C\C/C=C\C/C=C\CCCCC)OC(=O)CCC/C=C\C/C=C\C/C=C\C/C=C\CCCCC	0.0378418	0.661107
TG 58:9	RVXFSLZMZOFGEQ-SWIIBWKZSA-N	9545200	CCCCCCCC/C=C\CCCCCCCC(=O)OC[C@H](COC(=O)CCC/C=C\C/C=C\C/C=C\C/C=C\CCCCC)OC(=O)CCC/C=C\C/C=C\C/C=C\C/C=C\CCCCC	0.000384376	0.518596
TG 60:1	YNDXXWKSWMKVGO-HZLQDPIMSA-N	9544965	CCCCCCCCCCCCCCCCCCCC(=O)OC[C@H](COC(=O)CCCCCCCCC/C=C\CCCCCCCC)OC(=O)CCCCCCCCCCCCCCCCCCC	0.0270752	1.58003
TG 60:11	ASSZWZBQIXMMKM-SYTPEAHJSA-N	9545730	CCCCC/C=C\C/C=C\C/C=C\CCCCCCC(=O)OC[C@H](COC(=O)CCC/C=C\C/C=C\C/C=C\C/C=C\CCCCC)OC(=O)CCC/C=C\C/C=C\C/C=C\C/C=C\CCCCC	3.99032e-06	0.421284
TG 60:2	QPNVLDQSHXVPMG-JMYPUKFOSA-N	9545040	CCCCCCCCCCCCCCCCCCCC(=O)OC[C@H](COC(=O)CCCCCCCCC/C=C\CCCCCCCC)OC(=O)CCCCCCCCC/C=C\CCCCCCCC	0.109763	1.56848
TG 62:1	TZLOSVAFXBPUQT-VBMMIZSXSA-N	9545526	CCCCCCCCCCCCCCCCCCCCCC(=O)OC[C@H](COC(=O)CCCCCCCCCCCCCCCCCCC)OC(=O)CCCCCCCCC/C=C\CCCCCCCC	0.00786748	1.62107

## Sheet: Table S7
S7. Lipidome differential abundance analysis: Cluster III vs Cluster I at Visit -3
Compound Name	InChiKeys	Pubchem ID	SMILES	pvalue	foldchange
CE 18:1	RJECHNNFRHZQKU-RMUVNZEASA-N	5283632	CCCCCCCC/C=C\CCCCCCCC(=O)O[C@H]1CC[C@@]2([C@H]3CC[C@]4([C@H]([C@@H]3CC=C2C1)CC[C@@H]4[C@H](C)CCCC(C)C)C)C	1.50421e-06	0.694895
CE 18:2	NAACPBBQTFFYQB-LJAITQKLSA-N	5287939	CCCCC/C=C\C/C=C\CCCCCCCC(=O)O[C@H]1CC[C@@]2([C@H]3CC[C@]4([C@H]([C@@H]3CC=C2C1)CC[C@@H]4[C@H](C)CCCC(C)C)C)C	7.94864e-06	0.724539
CE 18:3	FYMCIBHUFSIWCE-WVXFKAQASA-N	6436907	CC/C=C\C/C=C\C/C=C\CCCCCCCC(=O)O[C@H]1CC[C@@]2([C@H]3CC[C@]4([C@H]([C@@H]3CC=C2C1)CC[C@@H]4[C@H](C)CCCC(C)C)C)C	6.87066e-08	0.565856
CE 20:4	IMXSFYNMSOULQS-BEDFLICRSA-N	6479222	CCCCC/C=C\C/C=C\C/C=C\C/C=C\CCCC(=O)O[C@H]1CC[C@@]2([C@H]3CC[C@]4([C@H]([C@@H]3CC=C2C1)CC[C@@H]4[C@H](C)CCCC(C)C)C)C	0.000139954	0.762359
CE 22:6	VOEVEGPMRIYYKC-HNJOWPRISA-N	14274978	CC/C=C\C/C=C\C/C=C\C/C=C\C/C=C\C/C=C\CCC(=O)O[C@H]1CC[C@@]2([C@H]3CC[C@]4([C@H]([C@@H]3CC=C2C1)CC[C@@H]4[C@H](C)CCCC(C)C)C)C	0.623644	0.941255
Ceramide d18:1/23:0	NAJHAHQNQCNWOP-PUYNVXOJSA-N	52931115	CCCCCCCCCCCCCCCCCCCCCCC(=O)N[C@@H](CO)[C@@H](/C=C/CCCCCCCCCCCCC)O	0.0210253	0.880199
Ceramide d40:1	KEPQASGDXIEOIL-GLQCRSEXSA-N	5283567	CCCCCCCCCCCCCCCCCCCCCC(=O)N[C@@H](CO)[C@@H](/C=C/CCCCCCCCCCCCC)O	0.624297	1.02647
Ceramide d42:1	ZJVVOYPTFQEGPH-AUTSUKAISA-N	5283571	CCCCCCCCCCCCCCCCCCCCCCCC(=O)N[C@@H](CO)[C@@H](/C=C/CCCCCCCCCCCCC)O	0.394709	1.03816
Ceramide d42:2	VJSBNBBOSZJDKB-KPEYJIHVSA-N	5283568	CCCCCCCCCCCCC/C=C/[C@H]([C@H](CO)NC(=O)CCCCCCCCCCCCC/C=C\CCCCCCCC)O	0.835563	0.985438
Cer (d18:1/16:0)	YDNKGFDKKRUKPY-TURZORIXSA-N	5283564	CCCCCCCCCCCCCCCC(=O)N[C@@H](CO)[C@@H](/C=C/CCCCCCCCCCCCC)O	0.269306	1.05849
Cer (d18:1/22:0)	KEPQASGDXIEOIL-GLQCRSEXSA-N	5283567	CCCCCCCCCCCCCCCCCCCCCC(=O)N[C@@H](CO)[C@@H](/C=C/CCCCCCCCCCCCC)O	0.502671	1.02991
Cer (d18:1/24:1)	VJSBNBBOSZJDKB-KPEYJIHVSA-N	5283568	CCCCCCCCCCCCC/C=C/[C@H]([C@H](CO)NC(=O)CCCCCCCCCCCCC/C=C\CCCCCCCC)O	0.897431	0.992183
Cholesterol	HVYWMOMLDIMFJA-DPAQBDIFSA-N	5997	C[C@H](CCCC(C)C)[C@H]1CC[C@@H]2[C@@]1(CC[C@H]3[C@H]2CC=C4[C@@]3(CC[C@@H](C4)O)C)C	0.933125	0.999006
DG 32:0	JEJLGIQLPYYGEE-XIFFEERXSA-N	644078	CCCCCCCCCCCCCCCC(=O)OC[C@H](CO)OC(=O)CCCCCCCCCCCCCCC	0.000186804	1.41821
DG 34:0	VYQDALBEQRZDPL-DHUJRADRSA-N	3246945	CCCCCCCCCCCCCCCCCC(=O)OC[C@H](CO)OC(=O)CCCCCCCCCCCCCCC	0.000175783	1.29948
DG 34:1	YEJYLHKQOBOSCP-OZKTZCCCSA-N	5282283	CCCCCCCCCCCCCCCC(=O)OC[C@H](CO)OC(=O)CCCCCCC/C=C\CCCCCCCC	3.64881e-05	1.58908
DG 36:0	UHUSDOQQWJGJQS-UHFFFAOYSA-N	102615	CCCCCCCCCCCCCCCCCC(=O)OCC(CO)OC(=O)CCCCCCCCCCCCCCCCC	0.837176	1.0106
DG 36:2	AFSHUZFNMVJNKX-LLWMBOQKSA-N	9543716	CCCCCCCC/C=C\CCCCCCCC(=O)OC[C@H](CO)OC(=O)CCCCCCC/C=C\CCCCCCCC	0.000146498	1.49157
DG 36:3	BLZVZPYMHLXLHG-JOBMVARSSA-N	9543722	CCCCCCCC/C=C\CCCCCCCC(=O)OC[C@H](CO)OC(=O)CCCCCCC/C=C\C/C=C\CCCCC	4.72183e-07	1.71792
DG 38:5	GRGDLDNREYVILP-CNWVQWJYSA-N	9543784	CCCCC/C=C\C/C=C\CCCCCCCCCC(=O)O[C@@H](CO)COC(=O)CCCCCCC/C=C\C/C=C\C/C=C\CC	1.20628e-05	1.46906
DG 38:6	YDVDXUYJFQLPEG-CTHJWPIASA-N	9543795	CCCCC/C=C\C/C=C\C/C=C\CCCCCCC(=O)O[C@@H](CO)COC(=O)CCCCCCC/C=C\C/C=C\C/C=C\CC	0.00250587	1.8495
DG 40:1	VFUWCRMMTRWZAT-JLDYGAOKSA-N	9543793	CCCCCCCCCCCCCCCCCCCC(=O)OC[C@H](CO)OC(=O)CCCCCCCCC/C=C\CCCCCCCC	0.745722	0.978881
FA 16:0	IPCSVZSSVZVIGE-UHFFFAOYSA-N	985	CCCCCCCCCCCCCCCC(=O)O	0.197781	1.09898
FA 16:1	SECPZKHBENQXJG-FPLPWBNLSA-N	445638	CCCCCC/C=C\CCCCCCCC(=O)O	0.653918	1.12997
FA 18:0	QIQXTHQIDYTFRH-UHFFFAOYSA-N	5281	CCCCCCCCCCCCCCCCCC(=O)O	0.302404	1.10612
FA 18:1	ZQPPMHVWECSIRJ-KTKRTIGZSA-N	445639	CCCCCCCC/C=C\CCCCCCCC(=O)O	0.261722	1.20819
FA 22:4	TWSWSIQAPQLDBP-DOFZRALJSA-N	5497181	CCCCC/C=C\C/C=C\C/C=C\C/C=C\CCCCCC(=O)O	0.0502355	1.17015
GlcCer d18:1/22:0	YIGARKIIFOHVPF-YAEABVQUSA-N	6321359	CCCCCCCCCCCCCCCCCCCCCC(=O)N[C@@H](CO[C@H]1C(C([C@@H]([C@H](O1)CO)O)O)O)[C@@H](/C=C/CCCCCCCCCCCCC)O	0.802421	1.01555
GlcCer d18:1/24:0	POQRWMRXUOPCLD-AAAFHMTMSA-N	6321361	CCCCCCCCCCCCCCCCCCCCCCCC(=O)N[C@@H](CO[C@H]1C(C([C@@H]([C@H](O1)CO)O)O)O)[C@@H](/C=C/CCCCCCCCCCCCC)O	0.762285	1.01781
GlcCer d18:1/24:1	WBOZIXHPUPAOIA-RBELZSLISA-N	6321360	CCCCCCCCCCCCC/C=C/[C@H]([C@H](CO[C@H]1C(C([C@@H]([C@H](O1)CO)O)O)O)NC(=O)CCCCCCCCCCCCC/C=C\CCCCCCCC)O	0.485044	0.950316
LPC 18:0	IHNKQIMGVNPMTC-RUZDIDTESA-N	497299	CCCCCCCCCCCCCCCCCC(=O)OC[C@H](COP(=O)([O-])OCC[N+](C)(C)C)O	0.0822983	1.15239
LPC 18:1	YAMUFBLWGFFICM-PTGWMXDISA-N	16081932	CCCCCCCC/C=C\CCCCCCCC(=O)OC[C@H](COP(=O)([O-])OCC[N+](C)(C)C)O	0.0356102	1.13931
LPC 18:2	SPJFYYJXNPEZDW-FTJOPAKQSA-N	11005824	CCCCC/C=C\C/C=C\CCCCCCCC(=O)OC[C@H](COP(=O)([O-])OCC[N+](C)(C)C)O	4.35754e-05	1.38389
LPC 20:0	UATOAILWGVYRQS-HHHXNRCGSA-N	24779473	CCCCCCCCCCCCCCCCCCCC(=O)OC[C@H](COP(=O)([O-])OCC[N+](C)(C)C)O	0.000907381	1.25739
LPC 20:1	GJTDRNFWIDPARY-GTPZACKGSA-N	24779475	CCCCCCCCCC/C=C\CCCCCCCC(=O)OC[C@H](COP(=O)([O-])OCC[N+](C)(C)C)O	0.0100529	1.26077
LPC 20:2	YYQVCMMXPIJVHY-ZOIJLGJPSA-N	52924053	CCCCC/C=C\C/C=C\CCCCCCCCCC(=O)OC[C@H](COP(=O)([O-])OCC[N+](C)(C)C)O	0.000365393	1.31388
LPE 18:0	BBYWOYAFBUOUFP-JOCHJYFZSA-N	46891690	CCCCCCCCCCCCCCCCCC(=O)OC[C@H](COP(=O)([O-])OCC[NH3+])O	0.749277	0.963877
LPE 18:2	DBHKHNGBVGWQJE-USWSLJGRSA-N	52925130	CCCCC/C=C\C/C=C\CCCCCCCC(=O)OC[C@H](COP(=O)(O)OCCN)O	0.00011022	1.45522
LPE 20:0	HEQMDGOBDIGJOC-XMMPIXPASA-N	52925131	CCCCCCCCCCCCCCCCCCCC(=O)OC[C@H](COP(=O)(O)OCCN)O	0.160297	0.979801
LPE 20:1	JEAGLCKGAKACCE-OPSAWKISSA-N	52925139	CCCCCCCC/C=C\CCCCCCCCCC(=O)OC[C@H](COP(=O)(O)OCCN)O	0.00654224	1.19666
PC 16:0/16:0	KILNVBDSWZSGLL-KXQOOQHDSA-N	452110	CCCCCCCCCCCCCCCC(=O)OC[C@H](COP(=O)([O-])OCC[N+](C)(C)C)OC(=O)CCCCCCCCCCCCCCC	0.0865531	1.06405
PC 18:1/16:0	WTJKGGKOPKCXLL-VYOBOKEXSA-N	5497103	CCCCCCCCCCCCCCCC(=O)OC[C@H](COP(=O)([O-])OCC[N+](C)(C)C)OC(=O)CCCCCCC/C=C\CCCCCCCC	0.00826853	0.946151
PC 28:0	CITHEXJVPOWHKC-UUWRZZSWSA-N	5459377	CCCCCCCCCCCCCC(=O)OC[C@H](COP(=O)([O-])OCC[N+](C)(C)C)OC(=O)CCCCCCCCCCCCC	0.86339	0.975265
PC 30:0	RFVFQQWKPSOBED-PSXMRANNSA-N	129657	CCCCCCCCCCCCCCCC(=O)O[C@H](COC(=O)CCCCCCCCCCCCC)COP(=O)([O-])OCC[N+](C)(C)C	0.413709	0.930571
PC 32:0	KILNVBDSWZSGLL-KXQOOQHDSA-N	452110	CCCCCCCCCCCCCCCC(=O)OC[C@H](COP(=O)([O-])OCC[N+](C)(C)C)OC(=O)CCCCCCCCCCCCCCC	0.0908156	1.09014
PC 32:1	QIBZFHLFHCIUOT-NPBIGWJUSA-N	6443788	CCCCCCCCCCCCCCCC(=O)OC[C@H](COP(=O)([O-])OCC[N+](C)(C)C)OC(=O)CCCCCCC/C=C\CCCCCC	0.00250755	0.805387
PC 32:2	GPWHCUUIQMGELX-VHQDNGOZSA-N	24778764	CCCCCC/C=C\CCCCCCCC(=O)OC[C@H](COP(=O)([O-])OCC[N+](C)(C)C)OC(=O)CCCCCCC/C=C\CCCCCC	0.144374	0.882053
PC 32:3	UXEFXNOSLOCOLX-ZCHSEWAGSA-N	52922763	CCCCCCCCCCCCCC(=O)O[C@H](COC(=O)CCCC/C=C\C/C=C\C/C=C\CCCCC)COP(=O)([O-])OCC[N+](C)(C)C	0.351506	0.918977
PC 33:1	GXTATYLPYLLNLV-MGIDVFSBSA-N	24778662	CCCCCCCCCCCCCCC(=O)OC[C@H](COP(=O)([O-])OCC[N+](C)(C)C)OC(=O)CCCCCCCCC/C=C\CCCCCC	2.77036e-07	0.668884
PC 34:0	PZNPLUBHRSSFHT-RRHRGVEJSA-N	24778686	CCCCCCCCCCCCCCCCCC(=O)O[C@H](COC(=O)CCCCCCCCCCCCCCC)COP(=O)([O-])OCC[N+](C)(C)C	0.00442386	1.16604
PC 34:1	WTJKGGKOPKCXLL-VYOBOKEXSA-N	5497103	CCCCCCCCCCCCCCCC(=O)OC[C@H](COP(=O)([O-])OCC[N+](C)(C)C)OC(=O)CCCCCCC/C=C\CCCCCCCC	0.002174	0.904911
PC 34:2	JLPULHDHAOZNQI-ZTIMHPMXSA-N	5287971	CCCCCCCCCCCCCCCC(=O)OC[C@H](COP(=O)([O-])OCC[N+](C)(C)C)OC(=O)CCCCCCC/C=C\C/C=C\CCCCC	0.261722	1.01851
PC 34:3	CNNSEHUKQJCGTE-UPPWDXJYSA-N	24778699	CCCCCCCCCCCCCCCC(=O)OC[C@H](COP(=O)([O-])OCC[N+](C)(C)C)OC(=O)CCCC/C=C\C/C=C\C/C=C\CCCCC	0.002227	0.79223
PC 35:2	ZSKWZJYUVZYDQU-WESJWMGVSA-N	52922491	CCCCCCCCCCCCCCCCC(=O)OC[C@H](COP(=O)([O-])OCC[N+](C)(C)C)OC(=O)CCCCCCC/C=C\C/C=C\CCCCC	0.0507625	0.903663
PC 36:0	NRJAVPSFFCBXDT-HUESYALOSA-N	94190	CCCCCCCCCCCCCCCCCC(=O)OC[C@H](COP(=O)([O-])OCC[N+](C)(C)C)OC(=O)CCCCCCCCCCCCCCCCC	0.00817607	0.864652
PC 36:1	ATHVAWFAEPLPPQ-VRDBWYNSSA-N	24778825	CCCCCCCCCCCCCCCCCC(=O)OC[C@H](COP(=O)([O-])OCC[N+](C)(C)C)OC(=O)CCCCCCC/C=C\CCCCCCCC	0.353902	0.958777
PC 36:2	SNKAWJBJQDLSFF-NVKMUCNASA-N	10350317	CCCCCCCC/C=C\CCCCCCCC(=O)OC[C@H](COP(=O)([O-])OCC[N+](C)(C)C)OC(=O)CCCCCCC/C=C\CCCCCCCC	0.0152338	1.05059
PC 36:3	BXRLDROZWDUSGM-ZRYFCQOPSA-N	24778937	CCCCCCCC/C=C\CCCCCCCC(=O)OC[C@H](COP(=O)([O-])OCC[N+](C)(C)C)OC(=O)CCCC/C=C\C/C=C\CCCCCCCC	0.22119	0.9269
PC 36:4	IIZPXYDJLKNOIY-JXPKJXOSSA-N	10747814	CCCCCCCCCCCCCCCC(=O)OC[C@H](COP(=O)([O-])OCC[N+](C)(C)C)OC(=O)CCC/C=C\C/C=C\C/C=C\C/C=C\CCCCC	0.20548	1.04115
PC 36:5	DYDDZDMJSQYFGN-OIVUZXIWSA-N	24778771	CCCCCC/C=C\CCCCCCCC(=O)OC[C@H](COP(=O)([O-])OCC[N+](C)(C)C)OC(=O)CCC/C=C\C/C=C\C/C=C\C/C=C\CCCCC	0.783277	1.00458
PC 36:6	SPWBDEZMKCRQSX-NGPPOSSDSA-N	52922847	CCCCC/C=C\C/C=C\C/C=C\CCCCC(=O)O[C@H](COC(=O)CCCCCCC/C=C\C/C=C\C/C=C\CC)COP(=O)([O-])OCC[N+](C)(C)C	0.378241	0.911788
PC 37:2	MCZUABDVGPPWPM-HJTCUGKVSA-N	52922735	CCCCCCCCCCCCCCCCCCC(=O)O[C@H](COC(=O)CCCCCCC/C=C\C/C=C\CCCCC)COP(=O)([O-])OCC[N+](C)(C)C	0.953524	1.0033
PC 37:3	OOYQEEUUQRMQKL-JUUDQZDJSA-N	52922851	CCCCCCCCCCCCCCCCCCC(=O)O[C@H](COC(=O)CCCCCCC/C=C\C/C=C\C/C=C\CC)COP(=O)([O-])OCC[N+](C)(C)C	0.00250755	0.741183
PC 37:4	QRPUCJXFPYFTMB-FBFLODOBSA-N	52922853	CCCCCCCCC/C=C\CCCCCCCC(=O)O[C@H](COC(=O)CCCCCCC/C=C\C/C=C\C/C=C\CC)COP(=O)([O-])OCC[N+](C)(C)C	0.228547	0.935601
PC 38:2	KXXLFCAPKGRXBT-FMJYHZMHSA-N	24779263	CCCCCCCCCCCCCCCCCCCC(=O)OC[C@H](COP(=O)([O-])OCC[N+](C)(C)C)OC(=O)CCCCCCC/C=C\C/C=C\CCCCC	0.640823	1.02197
PC 38:3	OJHJKEBRZSDTTL-VHWCKNCUSA-N	52922741	CCCCCCCC/C=C\CCCCCCCCCC(=O)O[C@H](COC(=O)CCCCCCC/C=C\C/C=C\CCCCC)COP(=O)([O-])OCC[N+](C)(C)C	0.0458394	0.757388
PC 38:4	DNYKSJQVBCVGOF-LCKGXUDJSA-N	52923291	CCCCCCCCCCCCCCCCCC(=O)O[C@H](COC(=O)CCC/C=C\C/C=C\C/C=C\C/C=C\CCCCC)COP(=O)([O-])OCC[N+](C)(C)C	0.0186893	1.09782
PC 38:5	YLWBKBDNHWQEFU-YJXJLLHLSA-N	53479033	CCCCCC/C=C\CCCCCCCCCC(=O)O[C@H](COC(=O)CCC/C=C\C/C=C\C/C=C\C/C=C\CCCCC)COP(=O)([O-])OCC[N+](C)(C)C	0.0101403	0.771719
PC 38:6	PLZBTDKJYHXIEW-DZUXOTHRSA-N	52923295	CCCCC/C=C\C/C=C\CCCCCCCC(=O)O[C@H](COC(=O)CCC/C=C\C/C=C\C/C=C\C/C=C\CCCCC)COP(=O)([O-])OCC[N+](C)(C)C	0.00101798	1.21472
PC 38:8	QQNHCRBGLPDWEW-LRFGEVPTSA-N	52922865	CC/C=C\C/C=C\C/C=C\CCCCCCCC(=O)OC[C@H](COP(=O)([O-])OCC[N+](C)(C)C)OC(=O)CCC/C=C\C/C=C\C/C=C\C/C=C\C/C=C\CC	8.10117e-05	0.50448
PC 40:2	AEUCYCQYAUFAKH-DITNKEBASA-N	24779063	CCCCCCCC/C=C\CCCCCCCCCC(=O)OC[C@H](COP(=O)([O-])OCC[N+](C)(C)C)OC(=O)CCCCCCCCC/C=C\CCCCCCCC	0.22119	1.08683
PC 40:5	LJFKFKIYUJNFPZ-ZLFSCUDPSA-N	52923133	CCCCCCCC/C=C\CCCCCCCCCC(=O)OC[C@H](COP(=O)([O-])OCC[N+](C)(C)C)OC(=O)CCC/C=C\C/C=C\C/C=C\C/C=C\CCCCC	0.00145101	1.32994
PC 40:6	TYRTWVKQVGNGSZ-RGBTVBCDSA-N	52923195	CCCCC/C=C\C/C=C\CCCCCCCCCC(=O)OC[C@H](COP(=O)([O-])OCC[N+](C)(C)C)OC(=O)CCC/C=C\C/C=C\C/C=C\C/C=C\CCCCC	0.0587331	1.13636
PC 40:7	BPUROMFCPFGBOT-ZEGPSQTJSA-N	24778982	CCCCC/C=C\C/C=C\CCCCCCCC(=O)OC[C@H](COP(=O)([O-])OCC[N+](C)(C)C)OC(=O)CC/C=C\C/C=C\C/C=C\C/C=C\C/C=C\CCCCC	0.589512	1.04636
PC 42:1	PAHPUCKPYBHMBM-RURDTVAGSA-N	24778881	CCCCCCCCCCCCCCCCCC(=O)OC[C@H](COP(=O)([O-])OCC[N+](C)(C)C)OC(=O)CCCCCCCCCCCCC/C=C\CCCCCCCC	0.0844425	0.892436
PC 42:4	SGYNBRXEOXADHS-CIUHTZMDSA-N	24779052	CCCCCCCCCCCCCCCCCCCC(=O)OC[C@H](COP(=O)([O-])OCC[N+](C)(C)C)OC(=O)CCCCC/C=C\C/C=C\C/C=C\C/C=C\C/C=C\CC	0.321972	1.06699
PC 42:6	DSVRMAGYENFTLY-GDDYDVMSSA-N	52923651	CCCCC/C=C\C/C=C\CCCCCCCCCC(=O)O[C@H](COC(=O)CCCCC/C=C\C/C=C\C/C=C\C/C=C\CCCCC)COP(=O)([O-])OCC[N+](C)(C)C	7.94641e-06	0.56534
PC 44:3	GZZUNXHFXFGEBB-MXZPZXETSA-N	52923541	CCCCCCCCCC/C=C\CCCCCCCCCC(=O)OC[C@H](COP(=O)([O-])OCC[N+](C)(C)C)OC(=O)CCCCCCCCCCC/C=C\C/C=C\CCCCC	0.28374	0.935647
PC 44:4	UIAAGLPOUUFIRG-ZUEQPGPOSA-N	52923481	CCCCCCCCCCCCCCCCCCCCCC(=O)OC[C@H](COP(=O)([O-])OCC[N+](C)(C)C)OC(=O)CCCCC/C=C\C/C=C\C/C=C\C/C=C\CCCCC	0.106508	1.09832
PC p34:1	OIICTMOQBYZCDA-IIKIFWEUSA-N	11125520	CCCCCCCCCCCCCCCC/C=C\OC[C@H](COP(=O)([O-])OCC[N+](C)(C)C)OC(=O)CCCCCCCCCCCCCCC	0.477083	0.966589
PC p34:2	KMNVIRCHUMQGHD-RCINKDPXSA-N	52923934	CCCCCCCCCCCCCCCC/C=C\OC[C@H](COP(=O)([O-])OCC[N+](C)(C)C)OC(=O)CCCCCCC/C=C\CCCCCC	0.0459708	0.906355
PC p34:3	QLEHHUPUHJPURI-PWYDUFMYSA-N	24779386	CCCCCCCCCCCCCC/C=C\OC[C@H](COP(=O)([O-])OCC[N+](C)(C)C)OC(=O)CCCCCCC/C=C\C/C=C\CCCCC	1.75177e-05	0.766324
PC p36:3	SOUZQPFUXRVDGK-KCTKZSJBSA-N	53481701	CCCCCCCCCCCCCCCCOC[C@H](COP(=O)([O-])OCC[N+](C)(C)C)OC(=O)CCCCCC/C=C\C/C=C\C/C=C\C/C=C\CC	0.0470871	0.901508
PC p36:4	IOYKZPNDXIIXLN-LOQSCQKMSA-N	24779388	CCCCCCCCCCCCCC/C=C\OC[C@H](COP(=O)([O-])OCC[N+](C)(C)C)OC(=O)CCC/C=C\C/C=C\C/C=C\C/C=C\CCCCC	0.629349	1.03068
PC p38:3	WOSDZWBQBJHAMR-NOQLVGMBSA-N	52925093	CCCCCCCCCCCCCCCC/C=C\OC[C@H](COP(=O)(O)OCCN)OC(=O)CCCCCCCCCCC/C=C\C/C=C\CCCCC	0.351506	0.932474
PC p38:4	BAKDTVUHENQVRW-IXXGCMLPSA-N	52925117	CCCCCCCCCCCCCCCCCC/C=C\OC[C@H](COP(=O)(O)OCCN)OC(=O)CCCCCC/C=C\C/C=C\C/C=C\CCCCC	0.174678	1.07652
PE 34:2	HBZNVZIRJWODIB-NHCUFCNUSA-N	46891780	CCCCCCCCCCCCCCCC(=O)OC[C@H](COP(=O)([O-])OCC[NH3+])OC(=O)CCCCCCC/C=C\C/C=C\CCCCC	0.417685	1.09932
PE 36:2	DXXUYBAISOHOLM-XRIXOMQFSA-N	52924894	CCCCCCCCCCCCCCCCCC(=O)O[C@H](COC(=O)CCCCCCC/C=C\C/C=C\CCCCC)COP(=O)(O)OCCN	0.000103593	0.753396
PE 36:3	GKAFCSRKMWFPSJ-RJXNKANHSA-N	71728379	CCCCCCCC/C=C\CCCCCCCC(=O)OC[C@H](COP(=O)([O-])OCC[NH3+])OC(=O)CCCCCCC/C=C\C/C=C\CCCCC	0.202595	0.963526
PE 36:4	DUQDVNACTOXOJA-KTKXOIIHSA-N	52924875	CCCCCCCCCCCCCCCC(=O)O[C@H](COC(=O)CCC/C=C\C/C=C\C/C=C\C/C=C\CCCCC)COP(=O)(O)OCCN	0.793173	1.02399
PE 38:2	CLPMAPXZURYSNH-CNBLIUODSA-N	9546825	CCCCCCCCCCCCCCCCCCCC(=O)OC[C@H](COP(=O)(O)OCCN)OC(=O)CCCCCCC/C=C\C/C=C\CCCCC	0.071612	0.906873
PE 38:4	ANRKEHNWXKCXDB-BHFWLYLHSA-N	46891781	CCCCCCCCCCCCCCCCCC(=O)OC[C@H](COP(=O)([O-])OCC[NH3+])OC(=O)CCC/C=C\C/C=C\C/C=C\C/C=C\CCCCC	0.0405425	1.27286
PE 38:6	LFGBKOUQHCWBQI-BZGLIJSBSA-N	52924893	CCCCC/C=C\C/C=C\CCCCCCCC(=O)OC[C@H](COP(=O)(O)OCCN)OC(=O)CCC/C=C\C/C=C\C/C=C\C/C=C\CCCCC	0.159724	1.16387
PE 40:6	FEABWDMFZNBFCT-KUVQHVNNSA-N	52924379	CCCCC/C=C\C/C=C\CCCCCCCC(=O)OC[C@H](COP(=O)(O)OCCN)OC(=O)CCCCC/C=C\C/C=C\C/C=C\C/C=C\CCCCC	0.00954458	1.19389
Phosphatidylglycerol 29:0	RYHJACYQTJIGMZ-JHOUSYSJSA-N	52926457	CCCCCCCCCCCCCCCC(=O)OC[C@H](COP(=O)(O)OC[C@H](CO)O)OC(=O)CCCCCCCCCCCC	0.0113267	1.05292
Plasmenyl-PC 34:2	IQACMFWAGALEAQ-WESJWMGVSA-N	6443157	CCCCCCCCCCCCCCCCOC[C@H](COP(=O)([O-])OCC[N+](C)(C)C)OC(=O)CCCCCCC/C=C\C/C=C\CCCCC	0.00366189	0.76728
Plasmenyl-PC 36:6	JCIBOIAZHLGPOT-YAYDGDQKSA-N	70698851	CCCCCC/C=C\CCCCCCCC/C=C\O[C@H](COC(=O)CCCC/C=C\C/C=C\C/C=C\C/C=C\CC)COP(=O)([O-])OCC[N+](C)(C)C	4.18026e-05	0.801571
Plasmenyl-PC 38:5	FHHVIBPVBBRLOR-IYACIECVSA-N	24779390	CCCCCCCCCCCCCCCC/C=C\OC[C@H](COP(=O)([O-])OCC[N+](C)(C)C)OC(=O)CCC/C=C\C/C=C\C/C=C\C/C=C\CCCCC	0.708507	0.967157
Plasmenyl-PE 36:3	XVXISDREVDGQPX-PISDLAQISA-N	52925079	CCCCCCCCCCCCCCCC/C=C\OC[C@H](COP(=O)(O)OCCN)OC(=O)CCCCCCC/C=C\C/C=C\CCCCC	0.0784094	0.88078
Plasmenyl-PE 36:5	UUYSKERSKRMYME-MAIXUNBTSA-N	52925126	CCCCCCCCCCCCCC/C=C\OC[C@H](COP(=O)(O)OCCN)OC(=O)CCC/C=C\C/C=C\C/C=C\C/C=C\CCCCC	0.029279	1.18284
Plasmenyl-PE 36:6	RLLOITCRNQRGJD-DFAKUSJGSA-N	52925061	CCCCCCCCCCCCCC/C=C\OC[C@H](COP(=O)(O)OCCN)OC(=O)CCC/C=C\C/C=C\C/C=C\C/C=C\C/C=C\CC	0.301222	0.822028
Plasmenyl-PE 38:5	URPXXNCTXCOATD-FXMFQVEGSA-N	86289532	CCCCCCCCCCCCCCCC/C=C\OC[C@H](COP(=O)([O-])OCC[NH3+])OC(=O)CCC/C=C\C/C=C\C/C=C\C/C=C\CCCCC	0.13175	1.14641
Plasmenyl-PE 38:6	KCNBSSYOJRUKOM-JALPNNRCSA-N	52925089	CCCCCCCCCCCCCCCC/C=C\OC[C@H](COP(=O)(O)OCCN)OC(=O)CCC/C=C\C/C=C\C/C=C\C/C=C\C/C=C\CC	0.0208876	1.21685
Plasmenyl-PE 38:7	WVGALBKSWOUIEZ-XNHMFJFDSA-N	5283497	CCCCCCCCCCCCCC/C=C\OC[C@H](COP(=O)(O)OCCN)OC(=O)CC/C=C\C/C=C\C/C=C\C/C=C\C/C=C\C/C=C\CC	0.00145101	1.34001
Plasmenyl-PE 40:6	CVCZYWPCMUWTNS-IXKBFPPMSA-N	52925119	CCCCCCCCCCCCCCCCCC/C=C\OC[C@H](COP(=O)(O)OCCN)OC(=O)CCC/C=C\C/C=C\C/C=C\C/C=C\C/C=C\CC	0.97521	1.00389
Plasmenyl-PE 40:7	FIJFPUAJUDAZEY-MNDXXDKYSA-N	42607458	CCCCCCCCCCCCCCCC/C=C\OC[C@H](COP(=O)(O)OCCN)OC(=O)CC/C=C\C/C=C\C/C=C\C/C=C\C/C=C\C/C=C\CC	0.046734	1.21835
PS 38:3	BQBTWCBZEKRLFP-BGFRNLFWSA-N	52925523	CCCCCCCCCCCCCCCCCCCC(=O)O[C@H](COC(=O)CCCCCCC/C=C\C/C=C\C/C=C\CC)COP(=O)(O)OC[C@@H](C(=O)O)N	0.00271845	0.946814
PS 38:4	SVOUGFFDROZBJI-DNALCEECSA-N	24779545	CCCCCCCCCCCCCCCCCC(=O)OC[C@H](COP(=O)(O)OC[C@@H](C(=O)O)N)OC(=O)CCC/C=C\C/C=C\C/C=C\C/C=C\CCCCC	0.5323	0.990662
PS 40:3	BTIQFPURPAGQHS-HOSNKBABSA-N	52925502	CCCCCCCCCCCCCCCCCCCCCC(=O)O[C@H](COC(=O)CCCC/C=C\C/C=C\C/C=C\CCCCC)COP(=O)(O)OC[C@@H](C(=O)O)N	0.463476	0.972138
PS 40:4	GBBNRADSWUALEU-AEDAHVLISA-N	52925748	CCCCCCCCCCCCCCCCCCCC(=O)O[C@H](COC(=O)CCC/C=C\C/C=C\C/C=C\C/C=C\CCCCC)COP(=O)(O)OC[C@@H](C(=O)O)N	0.144374	1.02574
PS 40:6	LYYHRRPTEXPVOR-SYEOQEKUSA-N	24779546	CCCCCCCCCCCCCCCCCC(=O)OC[C@H](COP(=O)(O)OC[C@@H](C(=O)O)N)OC(=O)CC/C=C\C/C=C\C/C=C\C/C=C\C/C=C\C/C=C\CC	0.421635	1.02281
PS 42:5	VNQACVFLMLYTLE-WDLXSBMRSA-N	52925755	CCCCCCCCCC/C=C\CCCCCCCCCC(=O)O[C@H](COC(=O)CCC/C=C\C/C=C\C/C=C\C/C=C\CCCCC)COP(=O)(O)OC[C@@H](C(=O)O)N	0.00129243	0.847866
PS 42:6	WOBFEYJLJCLDBR-NISVGTQTSA-N	52925756	CCCCC/C=C\C/C=C\CCCCCCCCCCCC(=O)O[C@H](COC(=O)CCC/C=C\C/C=C\C/C=C\C/C=C\CCCCC)COP(=O)(O)OC[C@@H](C(=O)O)N	0.0150166	1.1271
PS 42:8	ROCNHMAZFKRILY-PRDJOCNNSA-N	52925757	CCCCC/C=C\C/C=C\C/C=C\C/C=C\CCCCCC(=O)O[C@H](COC(=O)CCC/C=C\C/C=C\C/C=C\C/C=C\CCCCC)COP(=O)(O)OC[C@@H](C(=O)O)N	0.00559865	1.26644
PS p34:0	OHPHIZCKAAJKOG-PBSRCHRYSA-N	52926194	CCCCCCCCCCCCCCCCCC(=O)O[C@H](CO/C=C\CCCCCCCCCCCCCC)COP(=O)(O)OC[C@@H](C(=O)O)N	0.378241	0.94173
SM 33:1	LQINJRUGTUOHGS-YPDYIYJKSA-N	52931139	CCCCCCCCCCCCCCC(=O)N[C@@H](COP(=O)([O-])OCC[N+](C)(C)C)[C@@H](/C=C/CCCCCCCCCCCCC)O	0.116294	0.912775
SM 34:0	QHZIGNLCLJPLCU-QPPIDDCLSA-N	9939965	CCCCCCCCCCCCCCC[C@H]([C@H](COP(=O)([O-])OCC[N+](C)(C)C)NC(=O)CCCCCCCCCCCCCCC)O	0.502671	1.03619
SM d16:1/20:0	LKQLRGMMMAHREN-YJFXYUILSA-N	6453725	CCCCCCCCCCCCCCCCCC(=O)N[C@@H](COP(=O)([O-])OCC[N+](C)(C)C)[C@@H](/C=C/CCCCCCCCCCCCC)O	0.033315	1.10681
SM d16:1/20:1	NBEADXWAAWCCDG-QDDWGVBQSA-N	6443882	CCCCCCCCCCCCC/C=C/[C@H]([C@H](COP(=O)([O-])OCC[N+](C)(C)C)NC(=O)CCCCCCC/C=C\CCCCCCCC)O	0.485044	1.03884
SM d18:1/14:0	KYICBZWZQPCUMO-PSALXKTOSA-N	11433862	CCCCCCCCCCCCC/C=C/[C@H]([C@H](COP(=O)([O-])OCC[N+](C)(C)C)NC(=O)CCCCCCCCCCCCC)O	0.284814	1.07431
SM d18:1/16:0	RWKUXQNLWDTSLO-GWQJGLRPSA-N	9939941	CCCCCCCCCCCCCCCC(=O)N[C@@H](COP(=O)([O-])OCC[N+](C)(C)C)[C@@H](/C=C/CCCCCCCCCCCCC)O	0.397616	1.02318
SM d18:1/16:1	YLWSJLLZUHSIEA-CKSUKHGVSA-N	52931235	CCCCCCCCCCCCCCCC(=O)N[C@@H](COP(=O)([O-])OCC[N+](C)(C)C)[C@@H](/C=C/CCCCCCCC/C=C\CCC)O	0.36657	1.03586
SM (d18:1/18:0)	LKQLRGMMMAHREN-YJFXYUILSA-N	6453725	CCCCCCCCCCCCCCCCCC(=O)N[C@@H](COP(=O)([O-])OCC[N+](C)(C)C)[C@@H](/C=C/CCCCCCCCCCCCC)O	0.158116	1.07989
SM (d18:1/18:1)	NBEADXWAAWCCDG-QDDWGVBQSA-N	6443882	CCCCCCCCCCCCC/C=C/[C@H]([C@H](COP(=O)([O-])OCC[N+](C)(C)C)NC(=O)CCCCCCC/C=C\CCCCCCCC)O	0.417985	1.04864
SM d18:1/20:0	AADLTHQNYQJHQV-SVLGDMRNSA-N	44260124	CCCCCCCCCCCCCCCCCCCC(=O)N[C@@H](COP(=O)([O-])OCC[N+](C)(C)C)[C@@H](/C=C/CCCCCCCCCCCCC)O	0.139373	1.08052
SM (d18:1/20:1)	MDRFMTLYKHBJTF-NQYLGBTJSA-N	52931179	CCCCCCCCCCCCC/C=C/[C@H]([C@H](COP(=O)([O-])OCC[N+](C)(C)C)NC(=O)CCCCCCCCC/C=C\CCCCCCCC)O	0.748281	1.01585
SM d18:1/21:0	YXSZOBWVQJIWNE-QVDCKBILSA-N	52931193	CCCCCCCCCCCCCCCCCCCCC(=O)N[C@@H](COP(=O)([O-])OCC[N+](C)(C)C)[C@@H](/C=C/CCCCCCCCCCCCC)O	0.144374	0.895998
SM d18:1/22:0	FJJANLYCZUNFSE-TWKUQIQBSA-N	44260125	CCCCCCCCCCCCCCCCCCCCCC(=O)N[C@@H](COP(=O)([O-])OCC[N+](C)(C)C)[C@@H](/C=C/CCCCCCCCCCCCC)O	0.86339	1.00703
SM d18:1/23:0	SXZWBNWTCVLZJN-NMIJJABPSA-N	46891684	CCCCCCCCCCCCCCCCCCCCCCC(=O)N[C@@H](COP(=O)([O-])OCC[N+](C)(C)C)[C@@H](/C=C/CCCCCCCCCCCCC)O	0.0051253	0.856502
SM d18:1/24:0	QEDPUVGSSDPBMD-XTAIVQBESA-N	44260127	CCCCCCCCCCCCCCCCCCCCCCCC(=O)N[C@@H](COP(=O)([O-])OCC[N+](C)(C)C)[C@@H](/C=C/CCCCCCCCCCCCC)O	0.356494	1.06625
SM d18:2/23:0	JBDGKEXQKCCQFK-JWQIMADESA-N	52931209	CCCCCCCCCCCCCCCCCCCCCCC(=O)N[C@@H](COP(=O)([O-])OCC[N+](C)(C)C)[C@@H](/C=C/CCCCCCCC/C=C\CCC)O	3.41291e-05	0.811893
SM d18:2/24:0	DACOGJMBYLZYDH-GXJPFUDISA-N	52931217	CCCCCCCCCCCCCCCCCCCCCCCC(=O)N[C@@H](COP(=O)([O-])OCC[N+](C)(C)C)[C@@H](/C=C/CCCCCCCC/C=C\CCC)O	0.819164	0.986367
SM (d18:2/24:1)	TXFLWJQVQCDUDZ-BRUGZULGSA-N	52931215	CCCCCCCC/C=C\CCCCCCCCCCCCCC(=O)N[C@@H](COP(=O)([O-])OCC[N+](C)(C)C)[C@@H](/C=C/CCCCCCCC/C=C\CCC)O	0.646154	0.980616
TG 42:0	DUXYWXYOBMKGIN-UHFFFAOYSA-N	11148	CCCCCCCCCCCCCC(=O)OCC(COC(=O)CCCCCCCCCCCCC)OC(=O)CCCCCCCCCCCCC	0.000445839	2.79183
TG 44:1	UZLGGKDLJGDGEY-WVSHCNQOSA-N	56936554	CCCCCCCCCCCCCC(=O)OC[C@H](COC(=O)CCCCCCC/C=C\CCCCCC)OC(=O)CCCCCCCCCCCCC	3.27392e-05	3.19282
TG 46:0	JWVXCFSNEOMSHH-YACUFSJGSA-N	91865745	CCCCCCCCCCCCCCCC(=O)OC[C@@H](COC(=O)CCCCCCCCCCCCC)OC(=O)CCCCCCCCCCCCCCC	0.002227	1.79802
TG 46:1	RSDIQTNCDWUNDP-JHXSWNAYSA-N	56936558	CCCCCCCCCCCCCC(=O)OC[C@H](COC(=O)CCCCCCC/C=C\CCCCCCCC)OC(=O)CCCCCCCCCCCCC	1.98962e-05	2.67398
TG 46:2	XUEMVUXNOCIHLG-MOFPORNTSA-N	56936582	CCCCCCCCCCCCCC(=O)OC[C@H](COC(=O)CCCCCCC/C=C\CCCCCC)OC(=O)CCCCCCC/C=C\CCCCCC	5.34049e-06	3.30004
TG 46:3	AQARPXOEHQBBQN-OJJDTYCWSA-N	56936561	CCCCCCCCCCCCCC(=O)OC[C@H](COC(=O)CCCCCCC/C=C\C/C=C\C/C=C\CC)OC(=O)CCCCCCCCCCCCC	4.02004e-06	2.84934
TG 48:0	PVNIQBQSYATKKL-UHFFFAOYSA-N	11147	CCCCCCCCCCCCCCCC(=O)OCC(COC(=O)CCCCCCCCCCCCCCC)OC(=O)CCCCCCCCCCCCCCC	0.00826853	1.47708
TG 48:1	FEKLSEFRUGWUOS-DLOIZKPKSA-N	9543986	CCCCCCCCCCCCCCCC(=O)OC[C@H](COC(=O)CCCCCCC/C=C\CCCCCC)OC(=O)CCCCCCCCCCCCCCC	5.96917e-05	1.69728
TG 48:2	RUOVJPPUXXFZPC-YZEIBMOJSA-N	9543987	CCCCCCCCCCCCCCCC(=O)OC[C@H](COC(=O)CCCCCCC/C=C\CCCCCC)OC(=O)CCCCCCC/C=C\CCCCCC	1.03683e-05	2.15144
TG 48:3	SKGWNZXOCSYJQL-BUTYCLJRSA-N	9543989	CCCCCC/C=C\CCCCCCCC(=O)OCC(OC(=O)CCCCCCC/C=C\CCCCCC)COC(=O)CCCCCCC/C=C\CCCCCC	1.1592e-06	3.3957
TG 49:0	TTWJTJMWHOYBPQ-ANFMRNGASA-N	9543988	CCCCCCCCCCCCCCCCC(=O)OC[C@@H](COC(=O)CCCCCCCCCCCCCCC)OC(=O)CCCCCCCCCCCCCCC	0.0990118	1.38278
TG 49:1	VYYGQDOPVVYUKW-UKFBYESTSA-N	9543991	CCCCCCCCCCCCCCCC(=O)OC[C@H](COC(=O)CCCCCCC/C=C\CCCCCCC)OC(=O)CCCCCCCCCCCCCCC	0.0671774	1.36984
TG 49:2	QZYSUBAQYSVFNX-PSMULLBHSA-N	9543993	CCCCCCCCCCCCCCCCC(=O)OC[C@@H](COC(=O)CCCCCCC/C=C\CCCCCC)OC(=O)CCCCCCC/C=C\CCCCCC	0.0507625	1.29985
TG 50:0	QRJMBNGGFSPTQP-BXJPYAOGSA-N	3246958	[2H]C([2H])(C([2H])(C([2H])([2H])OC(=O)CCCCCCCCCCCCCCC)OC(=O)CCCCCCCCCCCCCCCCC)OC(=O)CCCCCCCCCCCCCCC	0.000305152	2.0737
TG 50:1	YHMDGPZOSGBQRH-YYSBDVFPSA-N	25240460	CCCCCCCCCCCCCCCC(=O)OC[C@H](COC(=O)CCCCCCC/C=C\CCCCCCCC)OC(=O)CCCCCCCCCCCCCCC	0.000112195	1.3554
TG 50:2	QEZWFCZNHWUARW-XQCAQTCHSA-N	9544010	CCCCCCCCCCCCCCCCCC(=O)OC[C@@H](COC(=O)CCCCCCC/C=C\CCCCCC)OC(=O)CCCCCCC/C=C\CCCCCC	1.4189e-06	1.43766
TG 50:3	UFHNZOACKFBCOM-YXKNDSBASA-N	25240357	CCCCCCCC/C=C\CCCCCCCC(=O)OC[C@@H](COC(=O)CCCCCCC/C=C\CCCCCC)OC(=O)CCCCCCC/C=C\CCCCCC	4.27944e-08	2.01571
TG 50:4	PVMBAGXWHHZKFP-JMPJWMFJSA-N	25240359	CCCCCC/C=C\CCCCCCCC(=O)OC[C@H](COC(=O)CCCCCCC/C=C\C/C=C\CCCCC)OC(=O)CCCCCCC/C=C\CCCCCC	1.54984e-07	2.38193
TG 50:5	AFTBPUXZTDLRSP-UDQIKIEDSA-N	9544045	CCCCCC/C=C\CCCCCCCC(=O)OC[C@H](COC(=O)CCCCCCC/C=C\C/C=C\C/C=C\CC)OC(=O)CCCCCCC/C=C\CCCCCC	4.27944e-08	2.58977
TG 51:1	OZAXLAGNPZMZAD-BOEMPQCLSA-N	9544006	CCCCCCCCCCCCCCCCC(=O)OC[C@H](COC(=O)CCCCCCC/C=C\CCCCCCC)OC(=O)CCCCCCCCCCCCCCCC	0.00896624	1.53724
TG 51:2	NSNSZGBCOIKUBU-SZOKBDNISA-N	9544013	CCCCCCCCCCCCCCCCC(=O)OC[C@H](COC(=O)CCCCCCC/C=C\CCCCCCC)OC(=O)CCCCCCC/C=C\CCCCCCC	0.0356102	1.30114
TG 51:3	ISSGPXMQOMAFMJ-DMGKHJLRSA-N	9544023	CCCCCCC/C=C\CCCCCCCC(=O)OCC(OC(=O)CCCCCCC/C=C\CCCCCCC)COC(=O)CCCCCCC/C=C\CCCCCCC	3.41943e-05	1.47863
TG 51:4	IIRQXNVLAXQEKB-KBEZCZBDSA-N	9544052	CCCCCCCC/C=C\CCCCCCCC(=O)OC[C@@H](COC(=O)CCCCCCC/C=C\CCCCCC)OC(=O)CCCCCCC/C=C\C/C=C\CCCC	1.39002e-06	1.70926
TG 52:0	SDNYRTVJOFMYIW-OIVUAWODSA-N	545690	CCCCCCCCCCCCCCCCCC(=O)OC[C@@H](COC(=O)CCCCCCCCCCCCCCC)OC(=O)CCCCCCCCCCCCCCCCC	0.000139954	2.39362
TG 52:1	NPCZZYKITFKRQZ-FQUZZJBASA-N	25240360	CCCCCCCCCCCCCCCCCC(=O)O[C@H](COC(=O)CCCCCCCCCCCCCCC)COC(=O)CCCCCCC/C=C\CCCCCCCC	6.98407e-07	2.22898
TG 52:2	KGLAHZTWGPHKFF-RISKEULASA-N	25240361	CCCCCCCCCCCCCCCC(=O)OC[C@H](COC(=O)CCCCCCC/C=C\C/C=C\CCCCC)OC(=O)CCCCCCC/C=C\CCCCCCCC	0.000198247	1.14646
TG 52:3	KGLAHZTWGPHKFF-RISKEULASA-N	25240361	CCCCCCCCCCCCCCCC(=O)OC[C@H](COC(=O)CCCCCCC/C=C\C/C=C\CCCCC)OC(=O)CCCCCCC/C=C\CCCCCCCC	4.27944e-08	1.26896
TG 52:4	WHSWXEYWNPTUPW-HNJDVRDNSA-N	25240364	CCCCCCCC/C=C\CCCCCCCC(=O)O[C@H](COC(=O)CCCCCCC/C=C\CCCCCC)COC(=O)CCCCCCC/C=C\C/C=C\CCCCC	2.62743e-07	1.69404
TG 52:5	CQZAAIKPSLHIBC-KDJOUNIJSA-N	25240366	CCCCCC/C=C\CCCCCCCC(=O)OC[C@H](COC(=O)CCCCCCC/C=C\C/C=C\CCCCC)OC(=O)CCCCCCC/C=C\C/C=C\CCCCC	1.2768e-06	1.96198
TG 53:0	ZJUXHXMIKPSINE-IONAWPRUSA-N	9544181	CCCCCCCCCCCCCCCCCCCCC(=O)OC[C@@H](COC(=O)CCCCCCCCCCCCCCC)OC(=O)CCCCCCCCCCCCCCC	0.00442386	1.52403
TG 53:1	WWJIBIGWKGFVAQ-JNSYTQKUSA-N	9544081	CCCCCCCCCCCCCCCCCC(=O)OC[C@@H](COC(=O)CCCCCCC/C=C\CCCCCCC)OC(=O)CCCCCCCCCCCCCCCCC	0.00305881	1.73865
TG 53:2	RSINITWKVQRWSZ-RFVLVDBCSA-N	9544102	CCCCCCCCCCCCCCCCCC(=O)OC[C@@H](COC(=O)CCCCCCC/C=C\C/C=C\CCCC)OC(=O)CCCCCCCCCCCCCCCCC	0.00145101	1.40057
TG 53:3	ZNQBEJJYVJSZLM-LEDQTTRKSA-N	9544126	CCCCCCCC/C=C\CCCCCCCC(=O)OC[C@@H](COC(=O)CCCCCCC/C=C\CCCCCCC)OC(=O)CCCCCCC/C=C\CCCCCCCC	6.13453e-06	1.57456
TG 53:4	BMSDHYZLQWTKSQ-LSJAAEOESA-N	9544152	CCCCCCCC/C=C\CCCCCCCC(=O)OC[C@@H](COC(=O)CCCCCCC/C=C\C/C=C\CCCC)OC(=O)CCCCCCC/C=C\CCCCCCCC	1.2768e-06	1.50192
TG 53:5	QHYAATSKYBYSLG-BXDFBOBBSA-N	9544183	CCCCCCC/C=C\CCCCCCCC(=O)OC[C@H](COC(=O)CCCCCCC/C=C\C/C=C\CCCCC)OC(=O)CCCCCCC/C=C\C/C=C\CCCCC	3.33181e-07	1.95716
TG 54:0	DCXXMTOCNZCJGO-UHFFFAOYSA-N	11146	CCCCCCCCCCCCCCCCCC(=O)OCC(COC(=O)CCCCCCCCCCCCCCCCC)OC(=O)CCCCCCCCCCCCCCCCC	0.000635921	1.71432
TG 54:1	YFFIQXNTTVSKJC-NZEOUKRFSA-N	16058371	CCCCCCCCCCCCCCCCCC(=O)OC[C@H](COC(=O)CCCCCCC/C=C\CCCCCCCC)OC(=O)CCCCCCCCCCCCCCCCC	9.39979e-07	2.74914
TG 54:2	RYNHWWNZNIGDAQ-BMTCQUSZSA-N	16058372	CCCCCCCCCCCCCCCCCC(=O)OC[C@H](COC(=O)CCCCCCC/C=C\CCCCCCCC)OC(=O)CCCCCCC/C=C\CCCCCCCC	6.87066e-08	2.13097
TG 54:3	PHYFQTYBJUILEZ-IUPFWZBJSA-N	5497163	CCCCCCCC/C=C\CCCCCCCC(=O)OCC(OC(=O)CCCCCCC/C=C\CCCCCCCC)COC(=O)CCCCCCC/C=C\CCCCCCCC	1.18486e-07	1.54809
TG 54:4	BRLGHZXETDWABO-NOFIOOQLSA-N	9544255	CCCCCCCCCCCCCCCCCC(=O)OC[C@H](COC(=O)CCCCCCC/C=C\C/C=C\C/C=C\CC)OC(=O)CCCCCCC/C=C\CCCCCCCC	2.26387e-06	1.66543
TG 54:5	VVEBTVMJPTZDHO-YQFZQLSNSA-N	25240373	CCCCCCCC/C=C\CCCCCCCC(=O)OC[C@H](COC(=O)CCCCCCC/C=C\C/C=C\CCCCC)OC(=O)CCCCCCC/C=C\C/C=C\CCCCC	2.96427e-08	2.0345
TG 54:6	HBOQXIRUPVQLKX-BBWANDEASA-N	5322095	CCCCC/C=C\C/C=C\CCCCCCCC(=O)OCC(OC(=O)CCCCCCC/C=C\C/C=C\CCCCC)COC(=O)CCCCCCC/C=C\C/C=C\CCCCC	3.76254e-07	2.59227
TG 54:8	BMPVTDWOWBNPJU-NYRSPQLFSA-N	9544413	CCCCC/C=C\C/C=C\C/C=C\C/C=C\CCCC(=O)OC[C@@H](COC(=O)CCCCCCC/C=C\C/C=C\CCCC)OC(=O)CCCCCCC/C=C\C/C=C\CCCC	0.0259192	1.58433
TG 56:1	OCYFAHIHWCVZKS-FHSLLVMSSA-N	9544345	CCCCCCCCCCCCCCCCCCCC(=O)OC[C@@H](COC(=O)CCCCCCCCCCCCCCCCC)OC(=O)CCCCCCC/C=C\CCCCCCCC	2.04367e-07	2.65986
TG 56:2	PDEQUPGHMOMBFC-FYEHETCMSA-N	9544390	CCCCCCCCCCCCCCCCCCCC(=O)OC[C@@H](COC(=O)CCCCCCCCCCCCCCCCC)OC(=O)CCCCCCC/C=C\C/C=C\CCCCC	2.96427e-08	2.99084
TG 56:3	QXMHHXQBBKDSSL-BAQZNRHJSA-N	9544447	CCCCCCCC/C=C\CCCCCCCCCC(=O)OC[C@@H](COC(=O)CCCCCCC/C=C\CCCCCCCC)OC(=O)CCCCCCC/C=C\CCCCCCCC	9.12219e-08	2.3208
TG 56:4	YONCDTJKIZDSKQ-IYASBODOSA-N	25240379	CCCCCCCC/C=C\CCCCCCCCCC(=O)OC[C@@H](COC(=O)CCCCCCC/C=C\CCCCCCCC)OC(=O)CCCCCCC/C=C\C/C=C\CCCCC	6.76306e-06	2.1819
TG 56:5	UHEJWASONFIROS-YPSHDQQVSA-N	25240380	CCCCCCCC/C=C\CCCCCCCCCC(=O)OC[C@@H](COC(=O)CCCCCCC/C=C\C/C=C\CCCCC)OC(=O)CCCCCCC/C=C\C/C=C\CCCCC	0.00490117	1.57274
TG 56:6	ZTNDRFCABXFVMY-WJTCTALZSA-N	9544625	CCCCC/C=C\C/C=C\CCCCCCCCCC(=O)OC[C@@H](COC(=O)CCCCCCC/C=C\C/C=C\CCCCC)OC(=O)CCCCCCC/C=C\C/C=C\CCCCC	0.658297	0.933418
TG 56:7	DODZUDCYRVWEOJ-GKZBLMSTSA-N	9544695	CCCCC/C=C\C/C=C\CCCCCCCC(=O)OC[C@H](COC(=O)CCCCCC/C=C\C/C=C\C/C=C\CCCCC)OC(=O)CCCCCCC/C=C\C/C=C\CCCCC	1.91483e-05	1.65177
TG 56:8	UBGUHMDKBGQUND-VPFWBQFRSA-N	9544762	CCCCCCCCCCCCCCCC(=O)OC[C@H](COC(=O)CCC/C=C\C/C=C\C/C=C\C/C=C\CCCCC)OC(=O)CCC/C=C\C/C=C\C/C=C\C/C=C\CCCCC	3.76254e-07	2.32181
TG 58:1	OWZMHFAFGQCCNI-FBXRAONGSA-N	25240381	CCCCCCCCCCCCCCCCCCCC(=O)OC[C@@H](COC(=O)CCCCCCC/C=C\CCCCCCCC)OC(=O)CCCCCCCCCCCCCCCCCCC	1.11458e-05	2.06574
TG 58:2	GXWBCAVCOMAOHT-VMCJOIRWSA-N	9545277	CCCCC/C=C\C/C=C\CCCCCCCC(=O)OC[C@H](COC(=O)CCC/C=C\C/C=C\C/C=C\C/C=C\CCCCC)OC(=O)CCC/C=C\C/C=C\C/C=C\C/C=C\CCCCC	1.56126e-07	2.50592
TG 58:3	RFMSTHTUAZETPD-JJPHLYBUSA-N	9544748	CCCCCCCC/C=C\CCCCCCCCCC(=O)OC[C@@H](COC(=O)CCCCCCC/C=C\CCCCCCCC)OC(=O)CCCCCCCCC/C=C\CCCCCCCC	1.18486e-07	2.85658
TG 58:4	CCKRHDUCFMOBKX-AAINFQTBSA-N	9544835	CCCCCCCCCCCCCCCCCCCC(=O)O[C@H](COC(=O)CCCCCCCCCCCCCCCCC)COC(=O)CCC/C=C\C/C=C\C/C=C\C/C=C\CCCCC	4.01909e-07	2.62936
TG 58:6	GSNFRUMSEHHPSY-LCXCSEBNSA-N	9544977	CCCCCCCC/C=C\CCCCCCCCCC(=O)O[C@H](COC(=O)CCCCCCC/C=C\CCCCCCCC)COC(=O)CCC/C=C\C/C=C\C/C=C\C/C=C\CCCCC	4.72183e-07	1.9276
TG 58:8	KWIGMCRWEINBIR-HUPVKWKYSA-N	9545124	CCCCCCCCCCCCCCCCCC(=O)OC[C@H](COC(=O)CCC/C=C\C/C=C\C/C=C\C/C=C\CCCCC)OC(=O)CCC/C=C\C/C=C\C/C=C\C/C=C\CCCCC	0.000152538	1.78732
TG 58:9	RVXFSLZMZOFGEQ-SWIIBWKZSA-N	9545200	CCCCCCCC/C=C\CCCCCCCC(=O)OC[C@H](COC(=O)CCC/C=C\C/C=C\C/C=C\C/C=C\CCCCC)OC(=O)CCC/C=C\C/C=C\C/C=C\C/C=C\CCCCC	5.23739e-07	2.23791
TG 60:1	YNDXXWKSWMKVGO-HZLQDPIMSA-N	9544965	CCCCCCCCCCCCCCCCCCCC(=O)OC[C@H](COC(=O)CCCCCCCCC/C=C\CCCCCCCC)OC(=O)CCCCCCCCCCCCCCCCCCC	6.75615e-05	1.71609
TG 60:11	ASSZWZBQIXMMKM-SYTPEAHJSA-N	9545730	CCCCC/C=C\C/C=C\C/C=C\CCCCCCC(=O)OC[C@H](COC(=O)CCC/C=C\C/C=C\C/C=C\C/C=C\CCCCC)OC(=O)CCC/C=C\C/C=C\C/C=C\C/C=C\CCCCC	0.00352447	1.60062
TG 60:2	QPNVLDQSHXVPMG-JMYPUKFOSA-N	9545040	CCCCCCCCCCCCCCCCCCCC(=O)OC[C@H](COC(=O)CCCCCCCCC/C=C\CCCCCCCC)OC(=O)CCCCCCCCC/C=C\CCCCCCCC	1.75177e-05	2.16211
TG 62:1	TZLOSVAFXBPUQT-VBMMIZSXSA-N	9545526	CCCCCCCCCCCCCCCCCCCCCC(=O)OC[C@H](COC(=O)CCCCCCCCCCCCCCCCCCC)OC(=O)CCCCCCCCC/C=C\CCCCCCCC	0.029279	1.29773

## Sheet: Table S8
S8. Lipidome differential abundance analysis: Cluster III vs Cluster I at Visit -6
Compound Name	InChiKeys	Pubchem ID	SMILES	pvalue	foldchange
CE 18:1	RJECHNNFRHZQKU-RMUVNZEASA-N	5283632	CCCCCCCC/C=C\CCCCCCCC(=O)O[C@H]1CC[C@@]2([C@H]3CC[C@]4([C@H]([C@@H]3CC=C2C1)CC[C@@H]4[C@H](C)CCCC(C)C)C)C	0.000269811	0.761792
CE 18:2	NAACPBBQTFFYQB-LJAITQKLSA-N	5287939	CCCCC/C=C\C/C=C\CCCCCCCC(=O)O[C@H]1CC[C@@]2([C@H]3CC[C@]4([C@H]([C@@H]3CC=C2C1)CC[C@@H]4[C@H](C)CCCC(C)C)C)C	3.34874e-05	0.672536
CE 18:3	FYMCIBHUFSIWCE-WVXFKAQASA-N	6436907	CC/C=C\C/C=C\C/C=C\CCCCCCCC(=O)O[C@H]1CC[C@@]2([C@H]3CC[C@]4([C@H]([C@@H]3CC=C2C1)CC[C@@H]4[C@H](C)CCCC(C)C)C)C	7.77953e-09	0.532799
CE 20:4	IMXSFYNMSOULQS-BEDFLICRSA-N	6479222	CCCCC/C=C\C/C=C\C/C=C\C/C=C\CCCC(=O)O[C@H]1CC[C@@]2([C@H]3CC[C@]4([C@H]([C@@H]3CC=C2C1)CC[C@@H]4[C@H](C)CCCC(C)C)C)C	0.0666704	0.878568
CE 22:6	VOEVEGPMRIYYKC-HNJOWPRISA-N	14274978	CC/C=C\C/C=C\C/C=C\C/C=C\C/C=C\C/C=C\CCC(=O)O[C@H]1CC[C@@]2([C@H]3CC[C@]4([C@H]([C@@H]3CC=C2C1)CC[C@@H]4[C@H](C)CCCC(C)C)C)C	0.340932	0.9037
Ceramide d18:1/23:0	NAJHAHQNQCNWOP-PUYNVXOJSA-N	52931115	CCCCCCCCCCCCCCCCCCCCCCC(=O)N[C@@H](CO)[C@@H](/C=C/CCCCCCCCCCCCC)O	0.0388545	0.873669
Ceramide d40:1	KEPQASGDXIEOIL-GLQCRSEXSA-N	5283567	CCCCCCCCCCCCCCCCCCCCCC(=O)N[C@@H](CO)[C@@H](/C=C/CCCCCCCCCCCCC)O	0.118459	1.09021
Ceramide d42:1	ZJVVOYPTFQEGPH-AUTSUKAISA-N	5283571	CCCCCCCCCCCCCCCCCCCCCCCC(=O)N[C@@H](CO)[C@@H](/C=C/CCCCCCCCCCCCC)O	0.345602	1.04772
Ceramide d42:2	VJSBNBBOSZJDKB-KPEYJIHVSA-N	5283568	CCCCCCCCCCCCC/C=C/[C@H]([C@H](CO)NC(=O)CCCCCCCCCCCCC/C=C\CCCCCCCC)O	0.266516	1.08078
Cer (d18:1/16:0)	YDNKGFDKKRUKPY-TURZORIXSA-N	5283564	CCCCCCCCCCCCCCCC(=O)N[C@@H](CO)[C@@H](/C=C/CCCCCCCCCCCCC)O	0.357889	1.04887
Cer (d18:1/22:0)	KEPQASGDXIEOIL-GLQCRSEXSA-N	5283567	CCCCCCCCCCCCCCCCCCCCCC(=O)N[C@@H](CO)[C@@H](/C=C/CCCCCCCCCCCCC)O	0.163074	1.07731
Cer (d18:1/24:1)	VJSBNBBOSZJDKB-KPEYJIHVSA-N	5283568	CCCCCCCCCCCCC/C=C/[C@H]([C@H](CO)NC(=O)CCCCCCCCCCCCC/C=C\CCCCCCCC)O	0.448828	1.05545
Cholesterol	HVYWMOMLDIMFJA-DPAQBDIFSA-N	5997	C[C@H](CCCC(C)C)[C@H]1CC[C@@H]2[C@@]1(CC[C@H]3[C@H]2CC=C4[C@@]3(CC[C@@H](C4)O)C)C	0.774678	0.995867
DG 32:0	JEJLGIQLPYYGEE-XIFFEERXSA-N	644078	CCCCCCCCCCCCCCCC(=O)OC[C@H](CO)OC(=O)CCCCCCCCCCCCCCC	0.000767663	1.39661
DG 34:0	VYQDALBEQRZDPL-DHUJRADRSA-N	3246945	CCCCCCCCCCCCCCCCCC(=O)OC[C@H](CO)OC(=O)CCCCCCCCCCCCCCC	0.0228114	1.22566
DG 34:1	YEJYLHKQOBOSCP-OZKTZCCCSA-N	5282283	CCCCCCCCCCCCCCCC(=O)OC[C@H](CO)OC(=O)CCCCCCC/C=C\CCCCCCCC	0.000435069	1.48518
DG 36:0	UHUSDOQQWJGJQS-UHFFFAOYSA-N	102615	CCCCCCCCCCCCCCCCCC(=O)OCC(CO)OC(=O)CCCCCCCCCCCCCCCCC	0.358485	1.0457
DG 36:2	AFSHUZFNMVJNKX-LLWMBOQKSA-N	9543716	CCCCCCCC/C=C\CCCCCCCC(=O)OC[C@H](CO)OC(=O)CCCCCCC/C=C\CCCCCCCC	0.0177674	1.26846
DG 36:3	BLZVZPYMHLXLHG-JOBMVARSSA-N	9543722	CCCCCCCC/C=C\CCCCCCCC(=O)OC[C@H](CO)OC(=O)CCCCCCC/C=C\C/C=C\CCCCC	0.00101614	1.35786
DG 38:5	GRGDLDNREYVILP-CNWVQWJYSA-N	9543784	CCCCC/C=C\C/C=C\CCCCCCCCCC(=O)O[C@@H](CO)COC(=O)CCCCCCC/C=C\C/C=C\C/C=C\CC	0.830894	1.06345
DG 38:6	YDVDXUYJFQLPEG-CTHJWPIASA-N	9543795	CCCCC/C=C\C/C=C\C/C=C\CCCCCCC(=O)O[C@@H](CO)COC(=O)CCCCCCC/C=C\C/C=C\C/C=C\CC	0.014972	1.78118
DG 40:1	VFUWCRMMTRWZAT-JLDYGAOKSA-N	9543793	CCCCCCCCCCCCCCCCCCCC(=O)OC[C@H](CO)OC(=O)CCCCCCCCC/C=C\CCCCCCCC	0.724734	1.02695
FA 16:0	IPCSVZSSVZVIGE-UHFFFAOYSA-N	985	CCCCCCCCCCCCCCCC(=O)O	0.250894	1.08437
FA 16:1	SECPZKHBENQXJG-FPLPWBNLSA-N	445638	CCCCCC/C=C\CCCCCCCC(=O)O	0.165194	1.35561
FA 18:0	QIQXTHQIDYTFRH-UHFFFAOYSA-N	5281	CCCCCCCCCCCCCCCCCC(=O)O	0.184774	1.1353
FA 18:1	ZQPPMHVWECSIRJ-KTKRTIGZSA-N	445639	CCCCCCCC/C=C\CCCCCCCC(=O)O	0.0996151	1.26487
FA 22:4	TWSWSIQAPQLDBP-DOFZRALJSA-N	5497181	CCCCC/C=C\C/C=C\C/C=C\C/C=C\CCCCCC(=O)O	0.0343436	1.19438
GlcCer d18:1/22:0	YIGARKIIFOHVPF-YAEABVQUSA-N	6321359	CCCCCCCCCCCCCCCCCCCCCC(=O)N[C@@H](CO[C@H]1C(C([C@@H]([C@H](O1)CO)O)O)O)[C@@H](/C=C/CCCCCCCCCCCCC)O	0.279517	1.06766
GlcCer d18:1/24:0	POQRWMRXUOPCLD-AAAFHMTMSA-N	6321361	CCCCCCCCCCCCCCCCCCCCCCCC(=O)N[C@@H](CO[C@H]1C(C([C@@H]([C@H](O1)CO)O)O)O)[C@@H](/C=C/CCCCCCCCCCCCC)O	0.631422	1.02883
GlcCer d18:1/24:1	WBOZIXHPUPAOIA-RBELZSLISA-N	6321360	CCCCCCCCCCCCC/C=C/[C@H]([C@H](CO[C@H]1C(C([C@@H]([C@H](O1)CO)O)O)O)NC(=O)CCCCCCCCCCCCC/C=C\CCCCCCCC)O	0.993239	1.00073
LPC 18:0	IHNKQIMGVNPMTC-RUZDIDTESA-N	497299	CCCCCCCCCCCCCCCCCC(=O)OC[C@H](COP(=O)([O-])OCC[N+](C)(C)C)O	0.035402	1.18982
LPC 18:1	YAMUFBLWGFFICM-PTGWMXDISA-N	16081932	CCCCCCCC/C=C\CCCCCCCC(=O)OC[C@H](COP(=O)([O-])OCC[N+](C)(C)C)O	0.131871	1.12613
LPC 18:2	SPJFYYJXNPEZDW-FTJOPAKQSA-N	11005824	CCCCC/C=C\C/C=C\CCCCCCCC(=O)OC[C@H](COP(=O)([O-])OCC[N+](C)(C)C)O	0.0113811	1.28611
LPC 20:0	UATOAILWGVYRQS-HHHXNRCGSA-N	24779473	CCCCCCCCCCCCCCCCCCCC(=O)OC[C@H](COP(=O)([O-])OCC[N+](C)(C)C)O	0.00653239	1.22727
LPC 20:1	GJTDRNFWIDPARY-GTPZACKGSA-N	24779475	CCCCCCCCCC/C=C\CCCCCCCC(=O)OC[C@H](COP(=O)([O-])OCC[N+](C)(C)C)O	0.00180996	1.30565
LPC 20:2	YYQVCMMXPIJVHY-ZOIJLGJPSA-N	52924053	CCCCC/C=C\C/C=C\CCCCCCCCCC(=O)OC[C@H](COP(=O)([O-])OCC[N+](C)(C)C)O	0.000446148	1.35692
LPE 18:0	BBYWOYAFBUOUFP-JOCHJYFZSA-N	46891690	CCCCCCCCCCCCCCCCCC(=O)OC[C@H](COP(=O)([O-])OCC[NH3+])O	0.284001	0.884689
LPE 18:2	DBHKHNGBVGWQJE-USWSLJGRSA-N	52925130	CCCCC/C=C\C/C=C\CCCCCCCC(=O)OC[C@H](COP(=O)(O)OCCN)O	0.0078438	1.40339
LPE 20:0	HEQMDGOBDIGJOC-XMMPIXPASA-N	52925131	CCCCCCCCCCCCCCCCCCCC(=O)OC[C@H](COP(=O)(O)OCCN)O	0.724734	0.993164
LPE 20:1	JEAGLCKGAKACCE-OPSAWKISSA-N	52925139	CCCCCCCC/C=C\CCCCCCCCCC(=O)OC[C@H](COP(=O)(O)OCCN)O	0.0536833	1.16673
PC 16:0/16:0	KILNVBDSWZSGLL-KXQOOQHDSA-N	452110	CCCCCCCCCCCCCCCC(=O)OC[C@H](COP(=O)([O-])OCC[N+](C)(C)C)OC(=O)CCCCCCCCCCCCCCC	0.00809352	1.1308
PC 18:1/16:0	WTJKGGKOPKCXLL-VYOBOKEXSA-N	5497103	CCCCCCCCCCCCCCCC(=O)OC[C@H](COP(=O)([O-])OCC[N+](C)(C)C)OC(=O)CCCCCCC/C=C\CCCCCCCC	0.00114931	0.923098
PC 28:0	CITHEXJVPOWHKC-UUWRZZSWSA-N	5459377	CCCCCCCCCCCCCC(=O)OC[C@H](COP(=O)([O-])OCC[N+](C)(C)C)OC(=O)CCCCCCCCCCCCC	0.607188	1.09004
PC 30:0	RFVFQQWKPSOBED-PSXMRANNSA-N	129657	CCCCCCCCCCCCCCCC(=O)O[C@H](COC(=O)CCCCCCCCCCCCC)COP(=O)([O-])OCC[N+](C)(C)C	0.751802	1.03884
PC 32:0	KILNVBDSWZSGLL-KXQOOQHDSA-N	452110	CCCCCCCCCCCCCCCC(=O)OC[C@H](COP(=O)([O-])OCC[N+](C)(C)C)OC(=O)CCCCCCCCCCCCCCC	0.00336926	1.20534
PC 32:1	QIBZFHLFHCIUOT-NPBIGWJUSA-N	6443788	CCCCCCCCCCCCCCCC(=O)OC[C@H](COP(=O)([O-])OCC[N+](C)(C)C)OC(=O)CCCCCCC/C=C\CCCCCC	0.00108997	0.801969
PC 32:2	GPWHCUUIQMGELX-VHQDNGOZSA-N	24778764	CCCCCC/C=C\CCCCCCCC(=O)OC[C@H](COP(=O)([O-])OCC[N+](C)(C)C)OC(=O)CCCCCCC/C=C\CCCCCC	0.0078438	0.790221
PC 32:3	UXEFXNOSLOCOLX-ZCHSEWAGSA-N	52922763	CCCCCCCCCCCCCC(=O)O[C@H](COC(=O)CCCC/C=C\C/C=C\C/C=C\CCCCC)COP(=O)([O-])OCC[N+](C)(C)C	0.369281	1.08884
PC 33:1	GXTATYLPYLLNLV-MGIDVFSBSA-N	24778662	CCCCCCCCCCCCCCC(=O)OC[C@H](COP(=O)([O-])OCC[N+](C)(C)C)OC(=O)CCCCCCCCC/C=C\CCCCCC	6.58179e-06	0.69422
PC 34:0	PZNPLUBHRSSFHT-RRHRGVEJSA-N	24778686	CCCCCCCCCCCCCCCCCC(=O)O[C@H](COC(=O)CCCCCCCCCCCCCCC)COP(=O)([O-])OCC[N+](C)(C)C	0.000140458	1.34551
PC 34:1	WTJKGGKOPKCXLL-VYOBOKEXSA-N	5497103	CCCCCCCCCCCCCCCC(=O)OC[C@H](COP(=O)([O-])OCC[N+](C)(C)C)OC(=O)CCCCCCC/C=C\CCCCCCCC	0.0008956	0.8839
PC 34:2	JLPULHDHAOZNQI-ZTIMHPMXSA-N	5287971	CCCCCCCCCCCCCCCC(=O)OC[C@H](COP(=O)([O-])OCC[N+](C)(C)C)OC(=O)CCCCCCC/C=C\C/C=C\CCCCC	0.225746	0.978133
PC 34:3	CNNSEHUKQJCGTE-UPPWDXJYSA-N	24778699	CCCCCCCCCCCCCCCC(=O)OC[C@H](COP(=O)([O-])OCC[N+](C)(C)C)OC(=O)CCCC/C=C\C/C=C\C/C=C\CCCCC	2.50668e-05	0.678538
PC 35:2	ZSKWZJYUVZYDQU-WESJWMGVSA-N	52922491	CCCCCCCCCCCCCCCCC(=O)OC[C@H](COP(=O)([O-])OCC[N+](C)(C)C)OC(=O)CCCCCCC/C=C\C/C=C\CCCCC	0.0126087	0.875176
PC 36:0	NRJAVPSFFCBXDT-HUESYALOSA-N	94190	CCCCCCCCCCCCCCCCCC(=O)OC[C@H](COP(=O)([O-])OCC[N+](C)(C)C)OC(=O)CCCCCCCCCCCCCCCCC	0.976468	0.996955
PC 36:1	ATHVAWFAEPLPPQ-VRDBWYNSSA-N	24778825	CCCCCCCCCCCCCCCCCC(=O)OC[C@H](COP(=O)([O-])OCC[N+](C)(C)C)OC(=O)CCCCCCC/C=C\CCCCCCCC	0.961654	1.00547
PC 36:2	SNKAWJBJQDLSFF-NVKMUCNASA-N	10350317	CCCCCCCC/C=C\CCCCCCCC(=O)OC[C@H](COP(=O)([O-])OCC[N+](C)(C)C)OC(=O)CCCCCCC/C=C\CCCCCCCC	0.0600579	1.05123
PC 36:3	BXRLDROZWDUSGM-ZRYFCQOPSA-N	24778937	CCCCCCCC/C=C\CCCCCCCC(=O)OC[C@H](COP(=O)([O-])OCC[N+](C)(C)C)OC(=O)CCCC/C=C\C/C=C\CCCCCCCC	0.452994	0.96311
PC 36:4	IIZPXYDJLKNOIY-JXPKJXOSSA-N	10747814	CCCCCCCCCCCCCCCC(=O)OC[C@H](COP(=O)([O-])OCC[N+](C)(C)C)OC(=O)CCC/C=C\C/C=C\C/C=C\C/C=C\CCCCC	0.302321	1.03054
PC 36:5	DYDDZDMJSQYFGN-OIVUZXIWSA-N	24778771	CCCCCC/C=C\CCCCCCCC(=O)OC[C@H](COP(=O)([O-])OCC[N+](C)(C)C)OC(=O)CCC/C=C\C/C=C\C/C=C\C/C=C\CCCCC	0.947596	0.998683
PC 36:6	SPWBDEZMKCRQSX-NGPPOSSDSA-N	52922847	CCCCC/C=C\C/C=C\C/C=C\CCCCC(=O)O[C@H](COC(=O)CCCCCCC/C=C\C/C=C\C/C=C\CC)COP(=O)([O-])OCC[N+](C)(C)C	0.0889958	0.819683
PC 37:2	MCZUABDVGPPWPM-HJTCUGKVSA-N	52922735	CCCCCCCCCCCCCCCCCCC(=O)O[C@H](COC(=O)CCCCCCC/C=C\C/C=C\CCCCC)COP(=O)([O-])OCC[N+](C)(C)C	0.328038	0.939687
PC 37:3	OOYQEEUUQRMQKL-JUUDQZDJSA-N	52922851	CCCCCCCCCCCCCCCCCCC(=O)O[C@H](COC(=O)CCCCCCC/C=C\C/C=C\C/C=C\CC)COP(=O)([O-])OCC[N+](C)(C)C	0.175106	0.860727
PC 37:4	QRPUCJXFPYFTMB-FBFLODOBSA-N	52922853	CCCCCCCCC/C=C\CCCCCCCC(=O)O[C@H](COC(=O)CCCCCCC/C=C\C/C=C\C/C=C\CC)COP(=O)([O-])OCC[N+](C)(C)C	0.38551	1.06264
PC 38:2	KXXLFCAPKGRXBT-FMJYHZMHSA-N	24779263	CCCCCCCCCCCCCCCCCCCC(=O)OC[C@H](COP(=O)([O-])OCC[N+](C)(C)C)OC(=O)CCCCCCC/C=C\C/C=C\CCCCC	0.0548523	1.1355
PC 38:3	OJHJKEBRZSDTTL-VHWCKNCUSA-N	52922741	CCCCCCCC/C=C\CCCCCCCCCC(=O)O[C@H](COC(=O)CCCCCCC/C=C\C/C=C\CCCCC)COP(=O)([O-])OCC[N+](C)(C)C	0.396339	0.912727
PC 38:4	DNYKSJQVBCVGOF-LCKGXUDJSA-N	52923291	CCCCCCCCCCCCCCCCCC(=O)O[C@H](COC(=O)CCC/C=C\C/C=C\C/C=C\C/C=C\CCCCC)COP(=O)([O-])OCC[N+](C)(C)C	0.00133333	1.15711
PC 38:5	YLWBKBDNHWQEFU-YJXJLLHLSA-N	53479033	CCCCCC/C=C\CCCCCCCCCC(=O)O[C@H](COC(=O)CCC/C=C\C/C=C\C/C=C\C/C=C\CCCCC)COP(=O)([O-])OCC[N+](C)(C)C	0.0218684	0.738616
PC 38:6	PLZBTDKJYHXIEW-DZUXOTHRSA-N	52923295	CCCCC/C=C\C/C=C\CCCCCCCC(=O)O[C@H](COC(=O)CCC/C=C\C/C=C\C/C=C\C/C=C\CCCCC)COP(=O)([O-])OCC[N+](C)(C)C	0.000373959	1.2119
PC 38:8	QQNHCRBGLPDWEW-LRFGEVPTSA-N	52922865	CC/C=C\C/C=C\C/C=C\CCCCCCCC(=O)OC[C@H](COP(=O)([O-])OCC[N+](C)(C)C)OC(=O)CCC/C=C\C/C=C\C/C=C\C/C=C\C/C=C\CC	0.00292213	0.590931
PC 40:2	AEUCYCQYAUFAKH-DITNKEBASA-N	24779063	CCCCCCCC/C=C\CCCCCCCCCC(=O)OC[C@H](COP(=O)([O-])OCC[N+](C)(C)C)OC(=O)CCCCCCCCC/C=C\CCCCCCCC	0.00614884	1.24413
PC 40:5	LJFKFKIYUJNFPZ-ZLFSCUDPSA-N	52923133	CCCCCCCC/C=C\CCCCCCCCCC(=O)OC[C@H](COP(=O)([O-])OCC[N+](C)(C)C)OC(=O)CCC/C=C\C/C=C\C/C=C\C/C=C\CCCCC	0.000110584	1.40048
PC 40:6	TYRTWVKQVGNGSZ-RGBTVBCDSA-N	52923195	CCCCC/C=C\C/C=C\CCCCCCCCCC(=O)OC[C@H](COP(=O)([O-])OCC[N+](C)(C)C)OC(=O)CCC/C=C\C/C=C\C/C=C\C/C=C\CCCCC	0.00428218	1.29278
PC 40:7	BPUROMFCPFGBOT-ZEGPSQTJSA-N	24778982	CCCCC/C=C\C/C=C\CCCCCCCC(=O)OC[C@H](COP(=O)([O-])OCC[N+](C)(C)C)OC(=O)CC/C=C\C/C=C\C/C=C\C/C=C\C/C=C\CCCCC	0.916759	0.988728
PC 42:1	PAHPUCKPYBHMBM-RURDTVAGSA-N	24778881	CCCCCCCCCCCCCCCCCC(=O)OC[C@H](COP(=O)([O-])OCC[N+](C)(C)C)OC(=O)CCCCCCCCCCCCC/C=C\CCCCCCCC	0.00142268	0.809013
PC 42:4	SGYNBRXEOXADHS-CIUHTZMDSA-N	24779052	CCCCCCCCCCCCCCCCCCCC(=O)OC[C@H](COP(=O)([O-])OCC[N+](C)(C)C)OC(=O)CCCCC/C=C\C/C=C\C/C=C\C/C=C\C/C=C\CC	0.240404	1.07971
PC 42:6	DSVRMAGYENFTLY-GDDYDVMSSA-N	52923651	CCCCC/C=C\C/C=C\CCCCCCCCCC(=O)O[C@H](COC(=O)CCCCC/C=C\C/C=C\C/C=C\C/C=C\CCCCC)COP(=O)([O-])OCC[N+](C)(C)C	0.000390038	0.627707
PC 44:3	GZZUNXHFXFGEBB-MXZPZXETSA-N	52923541	CCCCCCCCCC/C=C\CCCCCCCCCC(=O)OC[C@H](COP(=O)([O-])OCC[N+](C)(C)C)OC(=O)CCCCCCCCCCC/C=C\C/C=C\CCCCC	0.860564	1.01524
PC 44:4	UIAAGLPOUUFIRG-ZUEQPGPOSA-N	52923481	CCCCCCCCCCCCCCCCCCCCCC(=O)OC[C@H](COP(=O)([O-])OCC[N+](C)(C)C)OC(=O)CCCCC/C=C\C/C=C\C/C=C\C/C=C\CCCCC	0.04664	1.12638
PC p34:1	OIICTMOQBYZCDA-IIKIFWEUSA-N	11125520	CCCCCCCCCCCCCCCC/C=C\OC[C@H](COP(=O)([O-])OCC[N+](C)(C)C)OC(=O)CCCCCCCCCCCCCCC	0.980128	1.00157
PC p34:2	KMNVIRCHUMQGHD-RCINKDPXSA-N	52923934	CCCCCCCCCCCCCCCC/C=C\OC[C@H](COP(=O)([O-])OCC[N+](C)(C)C)OC(=O)CCCCCCC/C=C\CCCCCC	0.0731863	0.910511
PC p34:3	QLEHHUPUHJPURI-PWYDUFMYSA-N	24779386	CCCCCCCCCCCCCC/C=C\OC[C@H](COP(=O)([O-])OCC[N+](C)(C)C)OC(=O)CCCCCCC/C=C\C/C=C\CCCCC	2.55959e-05	0.708922
PC p36:3	SOUZQPFUXRVDGK-KCTKZSJBSA-N	53481701	CCCCCCCCCCCCCCCCOC[C@H](COP(=O)([O-])OCC[N+](C)(C)C)OC(=O)CCCCCC/C=C\C/C=C\C/C=C\C/C=C\CC	0.18817	0.936617
PC p36:4	IOYKZPNDXIIXLN-LOQSCQKMSA-N	24779388	CCCCCCCCCCCCCC/C=C\OC[C@H](COP(=O)([O-])OCC[N+](C)(C)C)OC(=O)CCC/C=C\C/C=C\C/C=C\C/C=C\CCCCC	0.38551	1.05054
PC p38:3	WOSDZWBQBJHAMR-NOQLVGMBSA-N	52925093	CCCCCCCCCCCCCCCC/C=C\OC[C@H](COP(=O)(O)OCCN)OC(=O)CCCCCCCCCCC/C=C\C/C=C\CCCCC	0.71309	0.96664
PC p38:4	BAKDTVUHENQVRW-IXXGCMLPSA-N	52925117	CCCCCCCCCCCCCCCCCC/C=C\OC[C@H](COP(=O)(O)OCCN)OC(=O)CCCCCC/C=C\C/C=C\C/C=C\CCCCC	0.0889958	1.08695
PE 34:2	HBZNVZIRJWODIB-NHCUFCNUSA-N	46891780	CCCCCCCCCCCCCCCC(=O)OC[C@H](COP(=O)([O-])OCC[NH3+])OC(=O)CCCCCCC/C=C\C/C=C\CCCCC	0.993239	1.00103
PE 36:2	DXXUYBAISOHOLM-XRIXOMQFSA-N	52924894	CCCCCCCCCCCCCCCCCC(=O)O[C@H](COC(=O)CCCCCCC/C=C\C/C=C\CCCCC)COP(=O)(O)OCCN	2.05871e-05	0.687264
PE 36:3	GKAFCSRKMWFPSJ-RJXNKANHSA-N	71728379	CCCCCCCC/C=C\CCCCCCCC(=O)OC[C@H](COP(=O)([O-])OCC[NH3+])OC(=O)CCCCCCC/C=C\C/C=C\CCCCC	0.752859	0.980144
PE 36:4	DUQDVNACTOXOJA-KTKXOIIHSA-N	52924875	CCCCCCCCCCCCCCCC(=O)O[C@H](COC(=O)CCC/C=C\C/C=C\C/C=C\C/C=C\CCCCC)COP(=O)(O)OCCN	0.491652	1.07722
PE 38:2	CLPMAPXZURYSNH-CNBLIUODSA-N	9546825	CCCCCCCCCCCCCCCCCCCC(=O)OC[C@H](COP(=O)(O)OCCN)OC(=O)CCCCCCC/C=C\C/C=C\CCCCC	0.0965985	0.905589
PE 38:4	ANRKEHNWXKCXDB-BHFWLYLHSA-N	46891781	CCCCCCCCCCCCCCCCCC(=O)OC[C@H](COP(=O)([O-])OCC[NH3+])OC(=O)CCC/C=C\C/C=C\C/C=C\C/C=C\CCCCC	0.114898	1.18574
PE 38:6	LFGBKOUQHCWBQI-BZGLIJSBSA-N	52924893	CCCCC/C=C\C/C=C\CCCCCCCC(=O)OC[C@H](COP(=O)(O)OCCN)OC(=O)CCC/C=C\C/C=C\C/C=C\C/C=C\CCCCC	0.142959	1.1728
PE 40:6	FEABWDMFZNBFCT-KUVQHVNNSA-N	52924379	CCCCC/C=C\C/C=C\CCCCCCCC(=O)OC[C@H](COP(=O)(O)OCCN)OC(=O)CCCCC/C=C\C/C=C\C/C=C\C/C=C\CCCCC	0.000646816	1.21251
Phosphatidylglycerol 29:0	RYHJACYQTJIGMZ-JHOUSYSJSA-N	52926457	CCCCCCCCCCCCCCCC(=O)OC[C@H](COP(=O)(O)OC[C@H](CO)O)OC(=O)CCCCCCCCCCCC	0.970787	1.00111
Plasmenyl-PC 34:2	IQACMFWAGALEAQ-WESJWMGVSA-N	6443157	CCCCCCCCCCCCCCCCOC[C@H](COP(=O)([O-])OCC[N+](C)(C)C)OC(=O)CCCCCCC/C=C\C/C=C\CCCCC	0.000183057	0.725233
Plasmenyl-PC 36:6	JCIBOIAZHLGPOT-YAYDGDQKSA-N	70698851	CCCCCC/C=C\CCCCCCCC/C=C\O[C@H](COC(=O)CCCC/C=C\C/C=C\C/C=C\C/C=C\CC)COP(=O)([O-])OCC[N+](C)(C)C	8.90235e-05	0.753658
Plasmenyl-PC 38:5	FHHVIBPVBBRLOR-IYACIECVSA-N	24779390	CCCCCCCCCCCCCCCC/C=C\OC[C@H](COP(=O)([O-])OCC[N+](C)(C)C)OC(=O)CCC/C=C\C/C=C\C/C=C\C/C=C\CCCCC	0.452994	1.0614
Plasmenyl-PE 36:3	XVXISDREVDGQPX-PISDLAQISA-N	52925079	CCCCCCCCCCCCCCCC/C=C\OC[C@H](COP(=O)(O)OCCN)OC(=O)CCCCCCC/C=C\C/C=C\CCCCC	0.0239502	0.830297
Plasmenyl-PE 36:5	UUYSKERSKRMYME-MAIXUNBTSA-N	52925126	CCCCCCCCCCCCCC/C=C\OC[C@H](COP(=O)(O)OCCN)OC(=O)CCC/C=C\C/C=C\C/C=C\C/C=C\CCCCC	0.00581632	1.24653
Plasmenyl-PE 36:6	RLLOITCRNQRGJD-DFAKUSJGSA-N	52925061	CCCCCCCCCCCCCC/C=C\OC[C@H](COP(=O)(O)OCCN)OC(=O)CCC/C=C\C/C=C\C/C=C\C/C=C\C/C=C\CC	0.617307	0.902781
Plasmenyl-PE 38:5	URPXXNCTXCOATD-FXMFQVEGSA-N	86289532	CCCCCCCCCCCCCCCC/C=C\OC[C@H](COP(=O)([O-])OCC[NH3+])OC(=O)CCC/C=C\C/C=C\C/C=C\C/C=C\CCCCC	0.00153347	1.2905
Plasmenyl-PE 38:6	KCNBSSYOJRUKOM-JALPNNRCSA-N	52925089	CCCCCCCCCCCCCCCC/C=C\OC[C@H](COP(=O)(O)OCCN)OC(=O)CCC/C=C\C/C=C\C/C=C\C/C=C\C/C=C\CC	4.95738e-05	1.46769
Plasmenyl-PE 38:7	WVGALBKSWOUIEZ-XNHMFJFDSA-N	5283497	CCCCCCCCCCCCCC/C=C\OC[C@H](COP(=O)(O)OCCN)OC(=O)CC/C=C\C/C=C\C/C=C\C/C=C\C/C=C\C/C=C\CC	6.58179e-06	1.53133
Plasmenyl-PE 40:6	CVCZYWPCMUWTNS-IXKBFPPMSA-N	52925119	CCCCCCCCCCCCCCCCCC/C=C\OC[C@H](COP(=O)(O)OCCN)OC(=O)CCC/C=C\C/C=C\C/C=C\C/C=C\C/C=C\CC	0.343844	1.15033
Plasmenyl-PE 40:7	FIJFPUAJUDAZEY-MNDXXDKYSA-N	42607458	CCCCCCCCCCCCCCCC/C=C\OC[C@H](COP(=O)(O)OCCN)OC(=O)CC/C=C\C/C=C\C/C=C\C/C=C\C/C=C\C/C=C\CC	0.000245226	1.41523
PS 38:3	BQBTWCBZEKRLFP-BGFRNLFWSA-N	52925523	CCCCCCCCCCCCCCCCCCCC(=O)O[C@H](COC(=O)CCCCCCC/C=C\C/C=C\C/C=C\CC)COP(=O)(O)OC[C@@H](C(=O)O)N	0.000295463	0.925016
PS 38:4	SVOUGFFDROZBJI-DNALCEECSA-N	24779545	CCCCCCCCCCCCCCCCCC(=O)OC[C@H](COP(=O)(O)OC[C@@H](C(=O)O)N)OC(=O)CCC/C=C\C/C=C\C/C=C\C/C=C\CCCCC	0.84302	0.996383
PS 40:3	BTIQFPURPAGQHS-HOSNKBABSA-N	52925502	CCCCCCCCCCCCCCCCCCCCCC(=O)O[C@H](COC(=O)CCCC/C=C\C/C=C\C/C=C\CCCCC)COP(=O)(O)OC[C@@H](C(=O)O)N	0.964542	1.00422
PS 40:4	GBBNRADSWUALEU-AEDAHVLISA-N	52925748	CCCCCCCCCCCCCCCCCCCC(=O)O[C@H](COC(=O)CCC/C=C\C/C=C\C/C=C\C/C=C\CCCCC)COP(=O)(O)OC[C@@H](C(=O)O)N	0.0820308	1.03753
PS 40:6	LYYHRRPTEXPVOR-SYEOQEKUSA-N	24779546	CCCCCCCCCCCCCCCCCC(=O)OC[C@H](COP(=O)(O)OC[C@@H](C(=O)O)N)OC(=O)CC/C=C\C/C=C\C/C=C\C/C=C\C/C=C\C/C=C\CC	0.144112	1.08954
PS 42:5	VNQACVFLMLYTLE-WDLXSBMRSA-N	52925755	CCCCCCCCCC/C=C\CCCCCCCCCC(=O)O[C@H](COC(=O)CCC/C=C\C/C=C\C/C=C\C/C=C\CCCCC)COP(=O)(O)OC[C@@H](C(=O)O)N	0.678873	0.969574
PS 42:6	WOBFEYJLJCLDBR-NISVGTQTSA-N	52925756	CCCCC/C=C\C/C=C\CCCCCCCCCCCC(=O)O[C@H](COC(=O)CCC/C=C\C/C=C\C/C=C\C/C=C\CCCCC)COP(=O)(O)OC[C@@H](C(=O)O)N	5.86213e-05	1.21592
PS 42:8	ROCNHMAZFKRILY-PRDJOCNNSA-N	52925757	CCCCC/C=C\C/C=C\C/C=C\C/C=C\CCCCCC(=O)O[C@H](COC(=O)CCC/C=C\C/C=C\C/C=C\C/C=C\CCCCC)COP(=O)(O)OC[C@@H](C(=O)O)N	0.00318092	1.33207
PS p34:0	OHPHIZCKAAJKOG-PBSRCHRYSA-N	52926194	CCCCCCCCCCCCCCCCCC(=O)O[C@H](CO/C=C\CCCCCCCCCCCCCC)COP(=O)(O)OC[C@@H](C(=O)O)N	0.916759	0.987302
SM 33:1	LQINJRUGTUOHGS-YPDYIYJKSA-N	52931139	CCCCCCCCCCCCCCC(=O)N[C@@H](COP(=O)([O-])OCC[N+](C)(C)C)[C@@H](/C=C/CCCCCCCCCCCCC)O	0.916759	0.9896
SM 34:0	QHZIGNLCLJPLCU-QPPIDDCLSA-N	9939965	CCCCCCCCCCCCCCC[C@H]([C@H](COP(=O)([O-])OCC[N+](C)(C)C)NC(=O)CCCCCCCCCCCCCCC)O	0.250894	1.09035
SM d16:1/20:0	LKQLRGMMMAHREN-YJFXYUILSA-N	6453725	CCCCCCCCCCCCCCCCCC(=O)N[C@@H](COP(=O)([O-])OCC[N+](C)(C)C)[C@@H](/C=C/CCCCCCCCCCCCC)O	0.000313755	1.20411
SM d16:1/20:1	NBEADXWAAWCCDG-QDDWGVBQSA-N	6443882	CCCCCCCCCCCCC/C=C/[C@H]([C@H](COP(=O)([O-])OCC[N+](C)(C)C)NC(=O)CCCCCCC/C=C\CCCCCCCC)O	0.090182	1.09035
SM d18:1/14:0	KYICBZWZQPCUMO-PSALXKTOSA-N	11433862	CCCCCCCCCCCCC/C=C/[C@H]([C@H](COP(=O)([O-])OCC[N+](C)(C)C)NC(=O)CCCCCCCCCCCCC)O	0.0144238	1.1891
SM d18:1/16:0	RWKUXQNLWDTSLO-GWQJGLRPSA-N	9939941	CCCCCCCCCCCCCCCC(=O)N[C@@H](COP(=O)([O-])OCC[N+](C)(C)C)[C@@H](/C=C/CCCCCCCCCCCCC)O	0.286626	1.03629
SM d18:1/16:1	YLWSJLLZUHSIEA-CKSUKHGVSA-N	52931235	CCCCCCCCCCCCCCCC(=O)N[C@@H](COP(=O)([O-])OCC[N+](C)(C)C)[C@@H](/C=C/CCCCCCCC/C=C\CCC)O	0.267078	1.04462
SM (d18:1/18:0)	LKQLRGMMMAHREN-YJFXYUILSA-N	6453725	CCCCCCCCCCCCCCCCCC(=O)N[C@@H](COP(=O)([O-])OCC[N+](C)(C)C)[C@@H](/C=C/CCCCCCCCCCCCC)O	0.000456427	1.20295
SM (d18:1/18:1)	NBEADXWAAWCCDG-QDDWGVBQSA-N	6443882	CCCCCCCCCCCCC/C=C/[C@H]([C@H](COP(=O)([O-])OCC[N+](C)(C)C)NC(=O)CCCCCCC/C=C\CCCCCCCC)O	0.0496114	1.11239
SM d18:1/20:0	AADLTHQNYQJHQV-SVLGDMRNSA-N	44260124	CCCCCCCCCCCCCCCCCCCC(=O)N[C@@H](COP(=O)([O-])OCC[N+](C)(C)C)[C@@H](/C=C/CCCCCCCCCCCCC)O	0.000646816	1.20016
SM (d18:1/20:1)	MDRFMTLYKHBJTF-NQYLGBTJSA-N	52931179	CCCCCCCCCCCCC/C=C/[C@H]([C@H](COP(=O)([O-])OCC[N+](C)(C)C)NC(=O)CCCCCCCCC/C=C\CCCCCCCC)O	0.288607	1.04933
SM d18:1/21:0	YXSZOBWVQJIWNE-QVDCKBILSA-N	52931193	CCCCCCCCCCCCCCCCCCCCC(=O)N[C@@H](COP(=O)([O-])OCC[N+](C)(C)C)[C@@H](/C=C/CCCCCCCCCCCCC)O	0.537838	0.950783
SM d18:1/22:0	FJJANLYCZUNFSE-TWKUQIQBSA-N	44260125	CCCCCCCCCCCCCCCCCCCCCC(=O)N[C@@H](COP(=O)([O-])OCC[N+](C)(C)C)[C@@H](/C=C/CCCCCCCCCCCCC)O	0.762839	1.01416
SM d18:1/23:0	SXZWBNWTCVLZJN-NMIJJABPSA-N	46891684	CCCCCCCCCCCCCCCCCCCCCCC(=O)N[C@@H](COP(=O)([O-])OCC[N+](C)(C)C)[C@@H](/C=C/CCCCCCCCCCCCC)O	0.000206088	0.800053
SM d18:1/24:0	QEDPUVGSSDPBMD-XTAIVQBESA-N	44260127	CCCCCCCCCCCCCCCCCCCCCCCC(=O)N[C@@H](COP(=O)([O-])OCC[N+](C)(C)C)[C@@H](/C=C/CCCCCCCCCCCCC)O	0.403027	0.963257
SM d18:2/23:0	JBDGKEXQKCCQFK-JWQIMADESA-N	52931209	CCCCCCCCCCCCCCCCCCCCCCC(=O)N[C@@H](COP(=O)([O-])OCC[N+](C)(C)C)[C@@H](/C=C/CCCCCCCC/C=C\CCC)O	6.48156e-05	0.808687
SM d18:2/24:0	DACOGJMBYLZYDH-GXJPFUDISA-N	52931217	CCCCCCCCCCCCCCCCCCCCCCCC(=O)N[C@@H](COP(=O)([O-])OCC[N+](C)(C)C)[C@@H](/C=C/CCCCCCCC/C=C\CCC)O	0.970787	1.0028
SM (d18:2/24:1)	TXFLWJQVQCDUDZ-BRUGZULGSA-N	52931215	CCCCCCCC/C=C\CCCCCCCCCCCCCC(=O)N[C@@H](COP(=O)([O-])OCC[N+](C)(C)C)[C@@H](/C=C/CCCCCCCC/C=C\CCC)O	0.970787	1.00213
TG 42:0	DUXYWXYOBMKGIN-UHFFFAOYSA-N	11148	CCCCCCCCCCCCCC(=O)OCC(COC(=O)CCCCCCCCCCCCC)OC(=O)CCCCCCCCCCCCC	0.000153067	3.46415
TG 44:1	UZLGGKDLJGDGEY-WVSHCNQOSA-N	56936554	CCCCCCCCCCCCCC(=O)OC[C@H](COC(=O)CCCCCCC/C=C\CCCCCC)OC(=O)CCCCCCCCCCCCC	4.1208e-05	4.23547
TG 46:0	JWVXCFSNEOMSHH-YACUFSJGSA-N	91865745	CCCCCCCCCCCCCCCC(=O)OC[C@@H](COC(=O)CCCCCCCCCCCCC)OC(=O)CCCCCCCCCCCCCCC	0.0037998	1.9315
TG 46:1	RSDIQTNCDWUNDP-JHXSWNAYSA-N	56936558	CCCCCCCCCCCCCC(=O)OC[C@H](COC(=O)CCCCCCC/C=C\CCCCCCCC)OC(=O)CCCCCCCCCCCCC	4.95738e-05	3.17907
TG 46:2	XUEMVUXNOCIHLG-MOFPORNTSA-N	56936582	CCCCCCCCCCCCCC(=O)OC[C@H](COC(=O)CCCCCCC/C=C\CCCCCC)OC(=O)CCCCCCC/C=C\CCCCCC	6.58179e-06	3.90662
TG 46:3	AQARPXOEHQBBQN-OJJDTYCWSA-N	56936561	CCCCCCCCCCCCCC(=O)OC[C@H](COC(=O)CCCCCCC/C=C\C/C=C\C/C=C\CC)OC(=O)CCCCCCCCCCCCC	2.05871e-05	3.21767
TG 48:0	PVNIQBQSYATKKL-UHFFFAOYSA-N	11147	CCCCCCCCCCCCCCCC(=O)OCC(COC(=O)CCCCCCCCCCCCCCC)OC(=O)CCCCCCCCCCCCCCC	0.0818492	1.32019
TG 48:1	FEKLSEFRUGWUOS-DLOIZKPKSA-N	9543986	CCCCCCCCCCCCCCCC(=O)OC[C@H](COC(=O)CCCCCCC/C=C\CCCCCC)OC(=O)CCCCCCCCCCCCCCC	0.000617326	1.74357
TG 48:2	RUOVJPPUXXFZPC-YZEIBMOJSA-N	9543987	CCCCCCCCCCCCCCCC(=O)OC[C@H](COC(=O)CCCCCCC/C=C\CCCCCC)OC(=O)CCCCCCC/C=C\CCCCCC	0.000113156	2.24959
TG 48:3	SKGWNZXOCSYJQL-BUTYCLJRSA-N	9543989	CCCCCC/C=C\CCCCCCCC(=O)OCC(OC(=O)CCCCCCC/C=C\CCCCCC)COC(=O)CCCCCCC/C=C\CCCCCC	6.58179e-06	3.50842
TG 49:0	TTWJTJMWHOYBPQ-ANFMRNGASA-N	9543988	CCCCCCCCCCCCCCCCC(=O)OC[C@@H](COC(=O)CCCCCCCCCCCCCCC)OC(=O)CCCCCCCCCCCCCCC	0.212242	1.32316
TG 49:1	VYYGQDOPVVYUKW-UKFBYESTSA-N	9543991	CCCCCCCCCCCCCCCC(=O)OC[C@H](COC(=O)CCCCCCC/C=C\CCCCCCC)OC(=O)CCCCCCCCCCCCCCC	0.175106	1.32843
TG 49:2	QZYSUBAQYSVFNX-PSMULLBHSA-N	9543993	CCCCCCCCCCCCCCCCC(=O)OC[C@@H](COC(=O)CCCCCCC/C=C\CCCCCC)OC(=O)CCCCCCC/C=C\CCCCCC	0.146655	1.28415
TG 50:0	QRJMBNGGFSPTQP-BXJPYAOGSA-N	3246958	[2H]C([2H])(C([2H])(C([2H])([2H])OC(=O)CCCCCCCCCCCCCCC)OC(=O)CCCCCCCCCCCCCCCCC)OC(=O)CCCCCCCCCCCCCCC	0.0139889	1.78032
TG 50:1	YHMDGPZOSGBQRH-YYSBDVFPSA-N	25240460	CCCCCCCCCCCCCCCC(=O)OC[C@H](COC(=O)CCCCCCC/C=C\CCCCCCCC)OC(=O)CCCCCCCCCCCCCCC	0.0012142	1.2838
TG 50:2	QEZWFCZNHWUARW-XQCAQTCHSA-N	9544010	CCCCCCCCCCCCCCCCCC(=O)OC[C@@H](COC(=O)CCCCCCC/C=C\CCCCCC)OC(=O)CCCCCCC/C=C\CCCCCC	0.000162841	1.34386
TG 50:3	UFHNZOACKFBCOM-YXKNDSBASA-N	25240357	CCCCCCCC/C=C\CCCCCCCC(=O)OC[C@@H](COC(=O)CCCCCCC/C=C\CCCCCC)OC(=O)CCCCCCC/C=C\CCCCCC	2.80615e-05	1.8096
TG 50:4	PVMBAGXWHHZKFP-JMPJWMFJSA-N	25240359	CCCCCC/C=C\CCCCCCCC(=O)OC[C@H](COC(=O)CCCCCCC/C=C\C/C=C\CCCCC)OC(=O)CCCCCCC/C=C\CCCCCC	2.55959e-05	2.15791
TG 50:5	AFTBPUXZTDLRSP-UDQIKIEDSA-N	9544045	CCCCCC/C=C\CCCCCCCC(=O)OC[C@H](COC(=O)CCCCCCC/C=C\C/C=C\C/C=C\CC)OC(=O)CCCCCCC/C=C\CCCCCC	8.90235e-05	2.07129
TG 51:1	OZAXLAGNPZMZAD-BOEMPQCLSA-N	9544006	CCCCCCCCCCCCCCCCC(=O)OC[C@H](COC(=O)CCCCCCC/C=C\CCCCCCC)OC(=O)CCCCCCCCCCCCCCCC	0.0562326	1.48067
TG 51:2	NSNSZGBCOIKUBU-SZOKBDNISA-N	9544013	CCCCCCCCCCCCCCCCC(=O)OC[C@H](COC(=O)CCCCCCC/C=C\CCCCCCC)OC(=O)CCCCCCC/C=C\CCCCCCC	0.231561	1.20503
TG 51:3	ISSGPXMQOMAFMJ-DMGKHJLRSA-N	9544023	CCCCCCC/C=C\CCCCCCCC(=O)OCC(OC(=O)CCCCCCC/C=C\CCCCCCC)COC(=O)CCCCCCC/C=C\CCCCCCC	0.0390914	1.28423
TG 51:4	IIRQXNVLAXQEKB-KBEZCZBDSA-N	9544052	CCCCCCCC/C=C\CCCCCCCC(=O)OC[C@@H](COC(=O)CCCCCCC/C=C\CCCCCC)OC(=O)CCCCCCC/C=C\C/C=C\CCCC	0.0019335	1.48398
TG 52:0	SDNYRTVJOFMYIW-OIVUAWODSA-N	545690	CCCCCCCCCCCCCCCCCC(=O)OC[C@@H](COC(=O)CCCCCCCCCCCCCCC)OC(=O)CCCCCCCCCCCCCCCCC	0.00439685	2.08315
TG 52:1	NPCZZYKITFKRQZ-FQUZZJBASA-N	25240360	CCCCCCCCCCCCCCCCCC(=O)O[C@H](COC(=O)CCCCCCCCCCCCCCC)COC(=O)CCCCCCC/C=C\CCCCCCCC	0.00014937	2.04296
TG 52:2	KGLAHZTWGPHKFF-RISKEULASA-N	25240361	CCCCCCCCCCCCCCCC(=O)OC[C@H](COC(=O)CCCCCCC/C=C\C/C=C\CCCCC)OC(=O)CCCCCCC/C=C\CCCCCCCC	0.00919028	1.11049
TG 52:3	KGLAHZTWGPHKFF-RISKEULASA-N	25240361	CCCCCCCCCCCCCCCC(=O)OC[C@H](COC(=O)CCCCCCC/C=C\C/C=C\CCCCC)OC(=O)CCCCCCC/C=C\CCCCCCCC	0.000307086	1.14695
TG 52:4	WHSWXEYWNPTUPW-HNJDVRDNSA-N	25240364	CCCCCCCC/C=C\CCCCCCCC(=O)O[C@H](COC(=O)CCCCCCC/C=C\CCCCCC)COC(=O)CCCCCCC/C=C\C/C=C\CCCCC	3.57544e-05	1.46315
TG 52:5	CQZAAIKPSLHIBC-KDJOUNIJSA-N	25240366	CCCCCC/C=C\CCCCCCCC(=O)OC[C@H](COC(=O)CCCCCCC/C=C\C/C=C\CCCCC)OC(=O)CCCCCCC/C=C\C/C=C\CCCCC	0.0037998	1.49753
TG 53:0	ZJUXHXMIKPSINE-IONAWPRUSA-N	9544181	CCCCCCCCCCCCCCCCCCCCC(=O)OC[C@@H](COC(=O)CCCCCCCCCCCCCCC)OC(=O)CCCCCCCCCCCCCCC	0.0549122	1.39814
TG 53:1	WWJIBIGWKGFVAQ-JNSYTQKUSA-N	9544081	CCCCCCCCCCCCCCCCCC(=O)OC[C@@H](COC(=O)CCCCCCC/C=C\CCCCCCC)OC(=O)CCCCCCCCCCCCCCCCC	0.0138154	1.79804
TG 53:2	RSINITWKVQRWSZ-RFVLVDBCSA-N	9544102	CCCCCCCCCCCCCCCCCC(=O)OC[C@@H](COC(=O)CCCCCCC/C=C\C/C=C\CCCC)OC(=O)CCCCCCCCCCCCCCCCC	0.302321	1.17037
TG 53:3	ZNQBEJJYVJSZLM-LEDQTTRKSA-N	9544126	CCCCCCCC/C=C\CCCCCCCC(=O)OC[C@@H](COC(=O)CCCCCCC/C=C\CCCCCCC)OC(=O)CCCCCCC/C=C\CCCCCCCC	0.0164827	1.34802
TG 53:4	BMSDHYZLQWTKSQ-LSJAAEOESA-N	9544152	CCCCCCCC/C=C\CCCCCCCC(=O)OC[C@@H](COC(=O)CCCCCCC/C=C\C/C=C\CCCC)OC(=O)CCCCCCC/C=C\CCCCCCCC	0.0058311	1.31846
TG 53:5	QHYAATSKYBYSLG-BXDFBOBBSA-N	9544183	CCCCCCC/C=C\CCCCCCCC(=O)OC[C@H](COC(=O)CCCCCCC/C=C\C/C=C\CCCCC)OC(=O)CCCCCCC/C=C\C/C=C\CCCCC	0.000123302	1.81601
TG 54:0	DCXXMTOCNZCJGO-UHFFFAOYSA-N	11146	CCCCCCCCCCCCCCCCCC(=O)OCC(COC(=O)CCCCCCCCCCCCCCCCC)OC(=O)CCCCCCCCCCCCCCCCC	0.0417343	1.42124
TG 54:1	YFFIQXNTTVSKJC-NZEOUKRFSA-N	16058371	CCCCCCCCCCCCCCCCCC(=O)OC[C@H](COC(=O)CCCCCCC/C=C\CCCCCCCC)OC(=O)CCCCCCCCCCCCCCCCC	0.00096277	2.12162
TG 54:2	RYNHWWNZNIGDAQ-BMTCQUSZSA-N	16058372	CCCCCCCCCCCCCCCCCC(=O)OC[C@H](COC(=O)CCCCCCC/C=C\CCCCCCCC)OC(=O)CCCCCCC/C=C\CCCCCCCC	0.000104852	1.82678
TG 54:3	PHYFQTYBJUILEZ-IUPFWZBJSA-N	5497163	CCCCCCCC/C=C\CCCCCCCC(=O)OCC(OC(=O)CCCCCCC/C=C\CCCCCCCC)COC(=O)CCCCCCC/C=C\CCCCCCCC	4.95738e-05	1.39904
TG 54:4	BRLGHZXETDWABO-NOFIOOQLSA-N	9544255	CCCCCCCCCCCCCCCCCC(=O)OC[C@H](COC(=O)CCCCCCC/C=C\C/C=C\C/C=C\CC)OC(=O)CCCCCCC/C=C\CCCCCCCC	0.00261468	1.40837
TG 54:5	VVEBTVMJPTZDHO-YQFZQLSNSA-N	25240373	CCCCCCCC/C=C\CCCCCCCC(=O)OC[C@H](COC(=O)CCCCCCC/C=C\C/C=C\CCCCC)OC(=O)CCCCCCC/C=C\C/C=C\CCCCC	0.00022841	1.50727
TG 54:6	HBOQXIRUPVQLKX-BBWANDEASA-N	5322095	CCCCC/C=C\C/C=C\CCCCCCCC(=O)OCC(OC(=O)CCCCCCC/C=C\C/C=C\CCCCC)COC(=O)CCCCCCC/C=C\C/C=C\CCCCC	0.000158932	1.85322
TG 54:8	BMPVTDWOWBNPJU-NYRSPQLFSA-N	9544413	CCCCC/C=C\C/C=C\C/C=C\C/C=C\CCCC(=O)OC[C@@H](COC(=O)CCCCCCC/C=C\C/C=C\CCCC)OC(=O)CCCCCCC/C=C\C/C=C\CCCC	0.0596436	1.4585
TG 56:1	OCYFAHIHWCVZKS-FHSLLVMSSA-N	9544345	CCCCCCCCCCCCCCCCCCCC(=O)OC[C@@H](COC(=O)CCCCCCCCCCCCCCCCC)OC(=O)CCCCCCC/C=C\CCCCCCCC	0.000866977	1.97059
TG 56:2	PDEQUPGHMOMBFC-FYEHETCMSA-N	9544390	CCCCCCCCCCCCCCCCCCCC(=O)OC[C@@H](COC(=O)CCCCCCCCCCCCCCCCC)OC(=O)CCCCCCC/C=C\C/C=C\CCCCC	0.00014937	2.12116
TG 56:3	QXMHHXQBBKDSSL-BAQZNRHJSA-N	9544447	CCCCCCCC/C=C\CCCCCCCCCC(=O)OC[C@@H](COC(=O)CCCCCCC/C=C\CCCCCCCC)OC(=O)CCCCCCC/C=C\CCCCCCCC	7.00805e-05	1.94102
TG 56:4	YONCDTJKIZDSKQ-IYASBODOSA-N	25240379	CCCCCCCC/C=C\CCCCCCCCCC(=O)OC[C@@H](COC(=O)CCCCCCC/C=C\CCCCCCCC)OC(=O)CCCCCCC/C=C\C/C=C\CCCCC	0.00416059	1.5157
TG 56:5	UHEJWASONFIROS-YPSHDQQVSA-N	25240380	CCCCCCCC/C=C\CCCCCCCCCC(=O)OC[C@@H](COC(=O)CCCCCCC/C=C\C/C=C\CCCCC)OC(=O)CCCCCCC/C=C\C/C=C\CCCCC	0.000141537	1.59962
TG 56:6	ZTNDRFCABXFVMY-WJTCTALZSA-N	9544625	CCCCC/C=C\C/C=C\CCCCCCCCCC(=O)OC[C@@H](COC(=O)CCCCCCC/C=C\C/C=C\CCCCC)OC(=O)CCCCCCC/C=C\C/C=C\CCCCC	0.781923	0.951909
TG 56:7	DODZUDCYRVWEOJ-GKZBLMSTSA-N	9544695	CCCCC/C=C\C/C=C\CCCCCCCC(=O)OC[C@H](COC(=O)CCCCCC/C=C\C/C=C\C/C=C\CCCCC)OC(=O)CCCCCCC/C=C\C/C=C\CCCCC	6.93983e-06	1.73212
TG 56:8	UBGUHMDKBGQUND-VPFWBQFRSA-N	9544762	CCCCCCCCCCCCCCCC(=O)OC[C@H](COC(=O)CCC/C=C\C/C=C\C/C=C\C/C=C\CCCCC)OC(=O)CCC/C=C\C/C=C\C/C=C\C/C=C\CCCCC	2.59302e-08	2.73601
TG 58:1	OWZMHFAFGQCCNI-FBXRAONGSA-N	25240381	CCCCCCCCCCCCCCCCCCCC(=O)OC[C@@H](COC(=O)CCCCCCC/C=C\CCCCCCCC)OC(=O)CCCCCCCCCCCCCCCCCCC	0.0286093	1.48435
TG 58:2	GXWBCAVCOMAOHT-VMCJOIRWSA-N	9545277	CCCCC/C=C\C/C=C\CCCCCCCC(=O)OC[C@H](COC(=O)CCC/C=C\C/C=C\C/C=C\C/C=C\CCCCC)OC(=O)CCC/C=C\C/C=C\C/C=C\C/C=C\CCCCC	0.00012283	1.88499
TG 58:3	RFMSTHTUAZETPD-JJPHLYBUSA-N	9544748	CCCCCCCC/C=C\CCCCCCCCCC(=O)OC[C@@H](COC(=O)CCCCCCC/C=C\CCCCCCCC)OC(=O)CCCCCCCCC/C=C\CCCCCCCC	0.000107809	2.15732
TG 58:4	CCKRHDUCFMOBKX-AAINFQTBSA-N	9544835	CCCCCCCCCCCCCCCCCCCC(=O)O[C@H](COC(=O)CCCCCCCCCCCCCCCCC)COC(=O)CCC/C=C\C/C=C\C/C=C\C/C=C\CCCCC	4.42541e-05	2.17542
TG 58:6	GSNFRUMSEHHPSY-LCXCSEBNSA-N	9544977	CCCCCCCC/C=C\CCCCCCCCCC(=O)O[C@H](COC(=O)CCCCCCC/C=C\CCCCCCCC)COC(=O)CCC/C=C\C/C=C\C/C=C\C/C=C\CCCCC	0.000605785	1.65242
TG 58:8	KWIGMCRWEINBIR-HUPVKWKYSA-N	9545124	CCCCCCCCCCCCCCCCCC(=O)OC[C@H](COC(=O)CCC/C=C\C/C=C\C/C=C\C/C=C\CCCCC)OC(=O)CCC/C=C\C/C=C\C/C=C\C/C=C\CCCCC	0.000337474	1.71545
TG 58:9	RVXFSLZMZOFGEQ-SWIIBWKZSA-N	9545200	CCCCCCCC/C=C\CCCCCCCC(=O)OC[C@H](COC(=O)CCC/C=C\C/C=C\C/C=C\C/C=C\CCCCC)OC(=O)CCC/C=C\C/C=C\C/C=C\C/C=C\CCCCC	5.96335e-07	2.14335
TG 60:1	YNDXXWKSWMKVGO-HZLQDPIMSA-N	9544965	CCCCCCCCCCCCCCCCCCCC(=O)OC[C@H](COC(=O)CCCCCCCCC/C=C\CCCCCCCC)OC(=O)CCCCCCCCCCCCCCCCCCC	0.0379547	1.41048
TG 60:11	ASSZWZBQIXMMKM-SYTPEAHJSA-N	9545730	CCCCC/C=C\C/C=C\C/C=C\CCCCCCC(=O)OC[C@H](COC(=O)CCC/C=C\C/C=C\C/C=C\C/C=C\CCCCC)OC(=O)CCC/C=C\C/C=C\C/C=C\C/C=C\CCCCC	8.90235e-05	1.81899
TG 60:2	QPNVLDQSHXVPMG-JMYPUKFOSA-N	9545040	CCCCCCCCCCCCCCCCCCCC(=O)OC[C@H](COC(=O)CCCCCCCCC/C=C\CCCCCCCC)OC(=O)CCCCCCCCC/C=C\CCCCCCCC	0.0549122	1.4153
TG 62:1	TZLOSVAFXBPUQT-VBMMIZSXSA-N	9545526	CCCCCCCCCCCCCCCCCCCCCC(=O)OC[C@H](COC(=O)CCCCCCCCCCCCCCCCCCC)OC(=O)CCCCCCCCC/C=C\CCCCCCCC	0.60471	1.07139

## Sheet: Table S9
S9. Lipidome differential abundance analysis: Cluster IV vs Cluster I at Visit -3
Compound Name	InChiKeys	Pubchem ID	SMILES	pvalue	foldchange
CE 18:1	RJECHNNFRHZQKU-RMUVNZEASA-N	5283632	CCCCCCCC/C=C\CCCCCCCC(=O)O[C@H]1CC[C@@]2([C@H]3CC[C@]4([C@H]([C@@H]3CC=C2C1)CC[C@@H]4[C@H](C)CCCC(C)C)C)C	5.56124e-06	0.713295
CE 18:2	NAACPBBQTFFYQB-LJAITQKLSA-N	5287939	CCCCC/C=C\C/C=C\CCCCCCCC(=O)O[C@H]1CC[C@@]2([C@H]3CC[C@]4([C@H]([C@@H]3CC=C2C1)CC[C@@H]4[C@H](C)CCCC(C)C)C)C	0.00175785	0.774733
CE 18:3	FYMCIBHUFSIWCE-WVXFKAQASA-N	6436907	CC/C=C\C/C=C\C/C=C\CCCCCCCC(=O)O[C@H]1CC[C@@]2([C@H]3CC[C@]4([C@H]([C@@H]3CC=C2C1)CC[C@@H]4[C@H](C)CCCC(C)C)C)C	1.38359e-05	0.66944
CE 20:4	IMXSFYNMSOULQS-BEDFLICRSA-N	6479222	CCCCC/C=C\C/C=C\C/C=C\C/C=C\CCCC(=O)O[C@H]1CC[C@@]2([C@H]3CC[C@]4([C@H]([C@@H]3CC=C2C1)CC[C@@H]4[C@H](C)CCCC(C)C)C)C	0.105839	0.895506
CE 22:6	VOEVEGPMRIYYKC-HNJOWPRISA-N	14274978	CC/C=C\C/C=C\C/C=C\C/C=C\C/C=C\C/C=C\CCC(=O)O[C@H]1CC[C@@]2([C@H]3CC[C@]4([C@H]([C@@H]3CC=C2C1)CC[C@@H]4[C@H](C)CCCC(C)C)C)C	8.22229e-07	0.472112
Ceramide d18:1/23:0	NAJHAHQNQCNWOP-PUYNVXOJSA-N	52931115	CCCCCCCCCCCCCCCCCCCCCCC(=O)N[C@@H](CO)[C@@H](/C=C/CCCCCCCCCCCCC)O	0.0208155	1.16713
Ceramide d40:1	KEPQASGDXIEOIL-GLQCRSEXSA-N	5283567	CCCCCCCCCCCCCCCCCCCCCC(=O)N[C@@H](CO)[C@@H](/C=C/CCCCCCCCCCCCC)O	0.433464	1.04799
Ceramide d42:1	ZJVVOYPTFQEGPH-AUTSUKAISA-N	5283571	CCCCCCCCCCCCCCCCCCCCCCCC(=O)N[C@@H](CO)[C@@H](/C=C/CCCCCCCCCCCCC)O	0.22498	1.06475
Ceramide d42:2	VJSBNBBOSZJDKB-KPEYJIHVSA-N	5283568	CCCCCCCCCCCCC/C=C/[C@H]([C@H](CO)NC(=O)CCCCCCCCCCCCC/C=C\CCCCCCCC)O	1.38359e-05	0.622628
Cer (d18:1/16:0)	YDNKGFDKKRUKPY-TURZORIXSA-N	5283564	CCCCCCCCCCCCCCCC(=O)N[C@@H](CO)[C@@H](/C=C/CCCCCCCCCCCCC)O	0.914756	0.99197
Cer (d18:1/22:0)	KEPQASGDXIEOIL-GLQCRSEXSA-N	5283567	CCCCCCCCCCCCCCCCCCCCCC(=O)N[C@@H](CO)[C@@H](/C=C/CCCCCCCCCCCCC)O	0.174235	1.07603
Cer (d18:1/24:1)	VJSBNBBOSZJDKB-KPEYJIHVSA-N	5283568	CCCCCCCCCCCCC/C=C/[C@H]([C@H](CO)NC(=O)CCCCCCCCCCCCC/C=C\CCCCCCCC)O	2.32767e-05	0.710909
Cholesterol	HVYWMOMLDIMFJA-DPAQBDIFSA-N	5997	C[C@H](CCCC(C)C)[C@H]1CC[C@@H]2[C@@]1(CC[C@H]3[C@H]2CC=C4[C@@]3(CC[C@@H](C4)O)C)C	0.433464	1.01061
DG 32:0	JEJLGIQLPYYGEE-XIFFEERXSA-N	644078	CCCCCCCCCCCCCCCC(=O)OC[C@H](CO)OC(=O)CCCCCCCCCCCCCCC	0.104184	1.20308
DG 34:0	VYQDALBEQRZDPL-DHUJRADRSA-N	3246945	CCCCCCCCCCCCCCCCCC(=O)OC[C@H](CO)OC(=O)CCCCCCCCCCCCCCC	0.0530249	1.16457
DG 34:1	YEJYLHKQOBOSCP-OZKTZCCCSA-N	5282283	CCCCCCCCCCCCCCCC(=O)OC[C@H](CO)OC(=O)CCCCCCC/C=C\CCCCCCCC	0.261182	1.1643
DG 36:0	UHUSDOQQWJGJQS-UHFFFAOYSA-N	102615	CCCCCCCCCCCCCCCCCC(=O)OCC(CO)OC(=O)CCCCCCCCCCCCCCCCC	0.475419	0.964406
DG 36:2	AFSHUZFNMVJNKX-LLWMBOQKSA-N	9543716	CCCCCCCC/C=C\CCCCCCCC(=O)OC[C@H](CO)OC(=O)CCCCCCC/C=C\CCCCCCCC	0.361456	1.11771
DG 36:3	BLZVZPYMHLXLHG-JOBMVARSSA-N	9543722	CCCCCCCC/C=C\CCCCCCCC(=O)OC[C@H](CO)OC(=O)CCCCCCC/C=C\C/C=C\CCCCC	0.00174154	1.47284
DG 38:5	GRGDLDNREYVILP-CNWVQWJYSA-N	9543784	CCCCC/C=C\C/C=C\CCCCCCCCCC(=O)O[C@@H](CO)COC(=O)CCCCCCC/C=C\C/C=C\C/C=C\CC	0.00175785	1.32709
DG 38:6	YDVDXUYJFQLPEG-CTHJWPIASA-N	9543795	CCCCC/C=C\C/C=C\C/C=C\CCCCCCC(=O)O[C@@H](CO)COC(=O)CCCCCCC/C=C\C/C=C\C/C=C\CC	3.86812e-05	2.0775
DG 40:1	VFUWCRMMTRWZAT-JLDYGAOKSA-N	9543793	CCCCCCCCCCCCCCCCCCCC(=O)OC[C@H](CO)OC(=O)CCCCCCCCC/C=C\CCCCCCCC	0.979316	0.99844
FA 16:0	IPCSVZSSVZVIGE-UHFFFAOYSA-N	985	CCCCCCCCCCCCCCCC(=O)O	0.845185	0.982756
FA 16:1	SECPZKHBENQXJG-FPLPWBNLSA-N	445638	CCCCCC/C=C\CCCCCCCC(=O)O	0.279159	0.715535
FA 18:0	QIQXTHQIDYTFRH-UHFFFAOYSA-N	5281	CCCCCCCCCCCCCCCCCC(=O)O	0.697608	1.04634
FA 18:1	ZQPPMHVWECSIRJ-KTKRTIGZSA-N	445639	CCCCCCCC/C=C\CCCCCCCC(=O)O	0.433464	0.850117
FA 22:4	TWSWSIQAPQLDBP-DOFZRALJSA-N	5497181	CCCCC/C=C\C/C=C\C/C=C\C/C=C\CCCCCC(=O)O	0.343603	1.08883
GlcCer d18:1/22:0	YIGARKIIFOHVPF-YAEABVQUSA-N	6321359	CCCCCCCCCCCCCCCCCCCCCC(=O)N[C@@H](CO[C@H]1C(C([C@@H]([C@H](O1)CO)O)O)O)[C@@H](/C=C/CCCCCCCCCCCCC)O	0.00152069	0.796047
GlcCer d18:1/24:0	POQRWMRXUOPCLD-AAAFHMTMSA-N	6321361	CCCCCCCCCCCCCCCCCCCCCCCC(=O)N[C@@H](CO[C@H]1C(C([C@@H]([C@H](O1)CO)O)O)O)[C@@H](/C=C/CCCCCCCCCCCCC)O	0.0058927	0.81604
GlcCer d18:1/24:1	WBOZIXHPUPAOIA-RBELZSLISA-N	6321360	CCCCCCCCCCCCC/C=C/[C@H]([C@H](CO[C@H]1C(C([C@@H]([C@H](O1)CO)O)O)O)NC(=O)CCCCCCCCCCCCC/C=C\CCCCCCCC)O	5.903e-07	0.604091
LPC 18:0	IHNKQIMGVNPMTC-RUZDIDTESA-N	497299	CCCCCCCCCCCCCCCCCC(=O)OC[C@H](COP(=O)([O-])OCC[N+](C)(C)C)O	0.827859	0.976122
LPC 18:1	YAMUFBLWGFFICM-PTGWMXDISA-N	16081932	CCCCCCCC/C=C\CCCCCCCC(=O)OC[C@H](COP(=O)([O-])OCC[N+](C)(C)C)O	0.179621	0.905206
LPC 18:2	SPJFYYJXNPEZDW-FTJOPAKQSA-N	11005824	CCCCC/C=C\C/C=C\CCCCCCCC(=O)OC[C@H](COP(=O)([O-])OCC[N+](C)(C)C)O	0.408665	1.08119
LPC 20:0	UATOAILWGVYRQS-HHHXNRCGSA-N	24779473	CCCCCCCCCCCCCCCCCCCC(=O)OC[C@H](COP(=O)([O-])OCC[N+](C)(C)C)O	0.174235	0.891375
LPC 20:1	GJTDRNFWIDPARY-GTPZACKGSA-N	24779475	CCCCCCCCCC/C=C\CCCCCCCC(=O)OC[C@H](COP(=O)([O-])OCC[N+](C)(C)C)O	0.011101	0.754287
LPC 20:2	YYQVCMMXPIJVHY-ZOIJLGJPSA-N	52924053	CCCCC/C=C\C/C=C\CCCCCCCCCC(=O)OC[C@H](COP(=O)([O-])OCC[N+](C)(C)C)O	0.797472	1.02508
LPE 18:0	BBYWOYAFBUOUFP-JOCHJYFZSA-N	46891690	CCCCCCCCCCCCCCCCCC(=O)OC[C@H](COP(=O)([O-])OCC[NH3+])O	0.979316	0.996506
LPE 18:2	DBHKHNGBVGWQJE-USWSLJGRSA-N	52925130	CCCCC/C=C\C/C=C\CCCCCCCC(=O)OC[C@H](COP(=O)(O)OCCN)O	0.0343047	1.2572
LPE 20:0	HEQMDGOBDIGJOC-XMMPIXPASA-N	52925131	CCCCCCCCCCCCCCCCCCCC(=O)OC[C@H](COP(=O)(O)OCCN)O	0.96402	1.00136
LPE 20:1	JEAGLCKGAKACCE-OPSAWKISSA-N	52925139	CCCCCCCC/C=C\CCCCCCCCCC(=O)OC[C@H](COP(=O)(O)OCCN)O	0.388439	0.931724
PC 16:0/16:0	KILNVBDSWZSGLL-KXQOOQHDSA-N	452110	CCCCCCCCCCCCCCCC(=O)OC[C@H](COP(=O)([O-])OCC[N+](C)(C)C)OC(=O)CCCCCCCCCCCCCCC	0.0711068	0.926581
PC 18:1/16:0	WTJKGGKOPKCXLL-VYOBOKEXSA-N	5497103	CCCCCCCCCCCCCCCC(=O)OC[C@H](COP(=O)([O-])OCC[N+](C)(C)C)OC(=O)CCCCCCC/C=C\CCCCCCCC	0.011101	0.935544
PC 28:0	CITHEXJVPOWHKC-UUWRZZSWSA-N	5459377	CCCCCCCCCCCCCC(=O)OC[C@H](COP(=O)([O-])OCC[N+](C)(C)C)OC(=O)CCCCCCCCCCCCC	0.975543	0.993271
PC 30:0	RFVFQQWKPSOBED-PSXMRANNSA-N	129657	CCCCCCCCCCCCCCCC(=O)O[C@H](COC(=O)CCCCCCCCCCCCC)COP(=O)([O-])OCC[N+](C)(C)C	0.45819	1.08619
PC 32:0	KILNVBDSWZSGLL-KXQOOQHDSA-N	452110	CCCCCCCCCCCCCCCC(=O)OC[C@H](COP(=O)([O-])OCC[N+](C)(C)C)OC(=O)CCCCCCCCCCCCCCC	0.0357512	0.891513
PC 32:1	QIBZFHLFHCIUOT-NPBIGWJUSA-N	6443788	CCCCCCCCCCCCCCCC(=O)OC[C@H](COP(=O)([O-])OCC[N+](C)(C)C)OC(=O)CCCCCCC/C=C\CCCCCC	0.875954	0.983202
PC 32:2	GPWHCUUIQMGELX-VHQDNGOZSA-N	24778764	CCCCCC/C=C\CCCCCCCC(=O)OC[C@H](COP(=O)([O-])OCC[N+](C)(C)C)OC(=O)CCCCCCC/C=C\CCCCCC	0.0633427	1.1847
PC 32:3	UXEFXNOSLOCOLX-ZCHSEWAGSA-N	52922763	CCCCCCCCCCCCCC(=O)O[C@H](COC(=O)CCCC/C=C\C/C=C\C/C=C\CCCCC)COP(=O)([O-])OCC[N+](C)(C)C	0.913897	1.01587
PC 33:1	GXTATYLPYLLNLV-MGIDVFSBSA-N	24778662	CCCCCCCCCCCCCCC(=O)OC[C@H](COP(=O)([O-])OCC[N+](C)(C)C)OC(=O)CCCCCCCCC/C=C\CCCCCC	0.248881	1.10433
PC 34:0	PZNPLUBHRSSFHT-RRHRGVEJSA-N	24778686	CCCCCCCCCCCCCCCCCC(=O)O[C@H](COC(=O)CCCCCCCCCCCCCCC)COP(=O)([O-])OCC[N+](C)(C)C	0.233231	0.933049
PC 34:1	WTJKGGKOPKCXLL-VYOBOKEXSA-N	5497103	CCCCCCCCCCCCCCCC(=O)OC[C@H](COP(=O)([O-])OCC[N+](C)(C)C)OC(=O)CCCCCCC/C=C\CCCCCCCC	0.0275035	0.913451
PC 34:2	JLPULHDHAOZNQI-ZTIMHPMXSA-N	5287971	CCCCCCCCCCCCCCCC(=O)OC[C@H](COP(=O)([O-])OCC[N+](C)(C)C)OC(=O)CCCCCCC/C=C\C/C=C\CCCCC	0.350984	1.01609
PC 34:3	CNNSEHUKQJCGTE-UPPWDXJYSA-N	24778699	CCCCCCCCCCCCCCCC(=O)OC[C@H](COP(=O)([O-])OCC[N+](C)(C)C)OC(=O)CCCC/C=C\C/C=C\C/C=C\CCCCC	0.0375717	0.862114
PC 35:2	ZSKWZJYUVZYDQU-WESJWMGVSA-N	52922491	CCCCCCCCCCCCCCCCC(=O)OC[C@H](COP(=O)([O-])OCC[N+](C)(C)C)OC(=O)CCCCCCC/C=C\C/C=C\CCCCC	0.000992181	1.22572
PC 36:0	NRJAVPSFFCBXDT-HUESYALOSA-N	94190	CCCCCCCCCCCCCCCCCC(=O)OC[C@H](COP(=O)([O-])OCC[N+](C)(C)C)OC(=O)CCCCCCCCCCCCCCCCC	0.388439	1.05636
PC 36:1	ATHVAWFAEPLPPQ-VRDBWYNSSA-N	24778825	CCCCCCCCCCCCCCCCCC(=O)OC[C@H](COP(=O)([O-])OCC[N+](C)(C)C)OC(=O)CCCCCCC/C=C\CCCCCCCC	0.121553	0.923106
PC 36:2	SNKAWJBJQDLSFF-NVKMUCNASA-N	10350317	CCCCCCCC/C=C\CCCCCCCC(=O)OC[C@H](COP(=O)([O-])OCC[N+](C)(C)C)OC(=O)CCCCCCC/C=C\CCCCCCCC	0.563463	1.01437
PC 36:3	BXRLDROZWDUSGM-ZRYFCQOPSA-N	24778937	CCCCCCCC/C=C\CCCCCCCC(=O)OC[C@H](COP(=O)([O-])OCC[N+](C)(C)C)OC(=O)CCCC/C=C\C/C=C\CCCCCCCC	0.827859	1.01538
PC 36:4	IIZPXYDJLKNOIY-JXPKJXOSSA-N	10747814	CCCCCCCCCCCCCCCC(=O)OC[C@H](COP(=O)([O-])OCC[N+](C)(C)C)OC(=O)CCC/C=C\C/C=C\C/C=C\C/C=C\CCCCC	0.0343047	1.0826
PC 36:5	DYDDZDMJSQYFGN-OIVUZXIWSA-N	24778771	CCCCCC/C=C\CCCCCCCC(=O)OC[C@H](COP(=O)([O-])OCC[N+](C)(C)C)OC(=O)CCC/C=C\C/C=C\C/C=C\C/C=C\CCCCC	0.168696	0.974134
PC 36:6	SPWBDEZMKCRQSX-NGPPOSSDSA-N	52922847	CCCCC/C=C\C/C=C\C/C=C\CCCCC(=O)O[C@H](COC(=O)CCCCCCC/C=C\C/C=C\C/C=C\CC)COP(=O)([O-])OCC[N+](C)(C)C	0.127005	0.830708
PC 37:2	MCZUABDVGPPWPM-HJTCUGKVSA-N	52922735	CCCCCCCCCCCCCCCCCCC(=O)O[C@H](COC(=O)CCCCCCC/C=C\C/C=C\CCCCC)COP(=O)([O-])OCC[N+](C)(C)C	0.254159	1.06759
PC 37:3	OOYQEEUUQRMQKL-JUUDQZDJSA-N	52922851	CCCCCCCCCCCCCCCCCCC(=O)O[C@H](COC(=O)CCCCCCC/C=C\C/C=C\C/C=C\CC)COP(=O)([O-])OCC[N+](C)(C)C	0.0208155	1.27456
PC 37:4	QRPUCJXFPYFTMB-FBFLODOBSA-N	52922853	CCCCCCCCC/C=C\CCCCCCCC(=O)O[C@H](COC(=O)CCCCCCC/C=C\C/C=C\C/C=C\CC)COP(=O)([O-])OCC[N+](C)(C)C	0.000296532	1.26228
PC 38:2	KXXLFCAPKGRXBT-FMJYHZMHSA-N	24779263	CCCCCCCCCCCCCCCCCCCC(=O)OC[C@H](COP(=O)([O-])OCC[N+](C)(C)C)OC(=O)CCCCCCC/C=C\C/C=C\CCCCC	0.254159	0.937695
PC 38:3	OJHJKEBRZSDTTL-VHWCKNCUSA-N	52922741	CCCCCCCC/C=C\CCCCCCCCCC(=O)O[C@H](COC(=O)CCCCCCC/C=C\C/C=C\CCCCC)COP(=O)([O-])OCC[N+](C)(C)C	0.156602	1.17792
PC 38:4	DNYKSJQVBCVGOF-LCKGXUDJSA-N	52923291	CCCCCCCCCCCCCCCCCC(=O)O[C@H](COC(=O)CCC/C=C\C/C=C\C/C=C\C/C=C\CCCCC)COP(=O)([O-])OCC[N+](C)(C)C	0.0345902	1.08905
PC 38:5	YLWBKBDNHWQEFU-YJXJLLHLSA-N	53479033	CCCCCC/C=C\CCCCCCCCCC(=O)O[C@H](COC(=O)CCC/C=C\C/C=C\C/C=C\C/C=C\CCCCC)COP(=O)([O-])OCC[N+](C)(C)C	0.248881	0.858989
PC 38:6	PLZBTDKJYHXIEW-DZUXOTHRSA-N	52923295	CCCCC/C=C\C/C=C\CCCCCCCC(=O)O[C@H](COC(=O)CCC/C=C\C/C=C\C/C=C\C/C=C\CCCCC)COP(=O)([O-])OCC[N+](C)(C)C	0.00105719	0.773217
PC 38:8	QQNHCRBGLPDWEW-LRFGEVPTSA-N	52922865	CC/C=C\C/C=C\C/C=C\CCCCCCCC(=O)OC[C@H](COP(=O)([O-])OCC[N+](C)(C)C)OC(=O)CCC/C=C\C/C=C\C/C=C\C/C=C\C/C=C\CC	2.32767e-05	0.494845
PC 40:2	AEUCYCQYAUFAKH-DITNKEBASA-N	24779063	CCCCCCCC/C=C\CCCCCCCCCC(=O)OC[C@H](COP(=O)([O-])OCC[N+](C)(C)C)OC(=O)CCCCCCCCC/C=C\CCCCCCCC	0.27447	0.917637
PC 40:5	LJFKFKIYUJNFPZ-ZLFSCUDPSA-N	52923133	CCCCCCCC/C=C\CCCCCCCCCC(=O)OC[C@H](COP(=O)([O-])OCC[N+](C)(C)C)OC(=O)CCC/C=C\C/C=C\C/C=C\C/C=C\CCCCC	0.00163165	0.697999
PC 40:6	TYRTWVKQVGNGSZ-RGBTVBCDSA-N	52923195	CCCCC/C=C\C/C=C\CCCCCCCCCC(=O)OC[C@H](COP(=O)([O-])OCC[N+](C)(C)C)OC(=O)CCC/C=C\C/C=C\C/C=C\C/C=C\CCCCC	0.112801	0.890212
PC 40:7	BPUROMFCPFGBOT-ZEGPSQTJSA-N	24778982	CCCCC/C=C\C/C=C\CCCCCCCC(=O)OC[C@H](COP(=O)([O-])OCC[N+](C)(C)C)OC(=O)CC/C=C\C/C=C\C/C=C\C/C=C\C/C=C\CCCCC	0.00624717	0.775231
PC 42:1	PAHPUCKPYBHMBM-RURDTVAGSA-N	24778881	CCCCCCCCCCCCCCCCCC(=O)OC[C@H](COP(=O)([O-])OCC[N+](C)(C)C)OC(=O)CCCCCCCCCCCCC/C=C\CCCCCCCC	0.00152069	0.766836
PC 42:4	SGYNBRXEOXADHS-CIUHTZMDSA-N	24779052	CCCCCCCCCCCCCCCCCCCC(=O)OC[C@H](COP(=O)([O-])OCC[N+](C)(C)C)OC(=O)CCCCC/C=C\C/C=C\C/C=C\C/C=C\C/C=C\CC	0.0412857	1.16299
PC 42:6	DSVRMAGYENFTLY-GDDYDVMSSA-N	52923651	CCCCC/C=C\C/C=C\CCCCCCCCCC(=O)O[C@H](COC(=O)CCCCC/C=C\C/C=C\C/C=C\C/C=C\CCCCC)COP(=O)([O-])OCC[N+](C)(C)C	0.669224	0.940664
PC 44:3	GZZUNXHFXFGEBB-MXZPZXETSA-N	52923541	CCCCCCCCCC/C=C\CCCCCCCCCC(=O)OC[C@H](COP(=O)([O-])OCC[N+](C)(C)C)OC(=O)CCCCCCCCCCC/C=C\C/C=C\CCCCC	6.833e-05	0.735687
PC 44:4	UIAAGLPOUUFIRG-ZUEQPGPOSA-N	52923481	CCCCCCCCCCCCCCCCCCCCCC(=O)OC[C@H](COP(=O)([O-])OCC[N+](C)(C)C)OC(=O)CCCCC/C=C\C/C=C\C/C=C\C/C=C\CCCCC	0.757351	0.975762
PC p34:1	OIICTMOQBYZCDA-IIKIFWEUSA-N	11125520	CCCCCCCCCCCCCCCC/C=C\OC[C@H](COP(=O)([O-])OCC[N+](C)(C)C)OC(=O)CCCCCCCCCCCCCCC	1.38359e-05	0.785005
PC p34:2	KMNVIRCHUMQGHD-RCINKDPXSA-N	52923934	CCCCCCCCCCCCCCCC/C=C\OC[C@H](COP(=O)([O-])OCC[N+](C)(C)C)OC(=O)CCCCCCC/C=C\CCCCCC	8.22893e-08	0.697825
PC p34:3	QLEHHUPUHJPURI-PWYDUFMYSA-N	24779386	CCCCCCCCCCCCCC/C=C\OC[C@H](COP(=O)([O-])OCC[N+](C)(C)C)OC(=O)CCCCCCC/C=C\C/C=C\CCCCC	0.00103466	0.770673
PC p36:3	SOUZQPFUXRVDGK-KCTKZSJBSA-N	53481701	CCCCCCCCCCCCCCCCOC[C@H](COP(=O)([O-])OCC[N+](C)(C)C)OC(=O)CCCCCC/C=C\C/C=C\C/C=C\C/C=C\CC	0.248881	0.925577
PC p36:4	IOYKZPNDXIIXLN-LOQSCQKMSA-N	24779388	CCCCCCCCCCCCCC/C=C\OC[C@H](COP(=O)([O-])OCC[N+](C)(C)C)OC(=O)CCC/C=C\C/C=C\C/C=C\C/C=C\CCCCC	0.0316497	0.853727
PC p38:3	WOSDZWBQBJHAMR-NOQLVGMBSA-N	52925093	CCCCCCCCCCCCCCCC/C=C\OC[C@H](COP(=O)(O)OCCN)OC(=O)CCCCCCCCCCC/C=C\C/C=C\CCCCC	0.433464	1.06637
PC p38:4	BAKDTVUHENQVRW-IXXGCMLPSA-N	52925117	CCCCCCCCCCCCCCCCCC/C=C\OC[C@H](COP(=O)(O)OCCN)OC(=O)CCCCCC/C=C\C/C=C\C/C=C\CCCCC	0.0343047	0.869895
PE 34:2	HBZNVZIRJWODIB-NHCUFCNUSA-N	46891780	CCCCCCCCCCCCCCCC(=O)OC[C@H](COP(=O)([O-])OCC[NH3+])OC(=O)CCCCCCC/C=C\C/C=C\CCCCC	0.0158258	1.19835
PE 36:2	DXXUYBAISOHOLM-XRIXOMQFSA-N	52924894	CCCCCCCCCCCCCCCCCC(=O)O[C@H](COC(=O)CCCCCCC/C=C\C/C=C\CCCCC)COP(=O)(O)OCCN	0.00030479	1.34452
PE 36:3	GKAFCSRKMWFPSJ-RJXNKANHSA-N	71728379	CCCCCCCC/C=C\CCCCCCCC(=O)OC[C@H](COP(=O)([O-])OCC[NH3+])OC(=O)CCCCCCC/C=C\C/C=C\CCCCC	0.238446	0.95172
PE 36:4	DUQDVNACTOXOJA-KTKXOIIHSA-N	52924875	CCCCCCCCCCCCCCCC(=O)O[C@H](COC(=O)CCC/C=C\C/C=C\C/C=C\C/C=C\CCCCC)COP(=O)(O)OCCN	0.020752	1.25673
PE 38:2	CLPMAPXZURYSNH-CNBLIUODSA-N	9546825	CCCCCCCCCCCCCCCCCCCC(=O)OC[C@H](COP(=O)(O)OCCN)OC(=O)CCCCCCC/C=C\C/C=C\CCCCC	0.00131039	1.20673
PE 38:4	ANRKEHNWXKCXDB-BHFWLYLHSA-N	46891781	CCCCCCCCCCCCCCCCCC(=O)OC[C@H](COP(=O)([O-])OCC[NH3+])OC(=O)CCC/C=C\C/C=C\C/C=C\C/C=C\CCCCC	0.0130144	1.44828
PE 38:6	LFGBKOUQHCWBQI-BZGLIJSBSA-N	52924893	CCCCC/C=C\C/C=C\CCCCCCCC(=O)OC[C@H](COP(=O)(O)OCCN)OC(=O)CCC/C=C\C/C=C\C/C=C\C/C=C\CCCCC	0.0185524	0.752994
PE 40:6	FEABWDMFZNBFCT-KUVQHVNNSA-N	52924379	CCCCC/C=C\C/C=C\CCCCCCCC(=O)OC[C@H](COP(=O)(O)OCCN)OC(=O)CCCCC/C=C\C/C=C\C/C=C\C/C=C\CCCCC	0.00785828	0.799804
Phosphatidylglycerol 29:0	RYHJACYQTJIGMZ-JHOUSYSJSA-N	52926457	CCCCCCCCCCCCCCCC(=O)OC[C@H](COP(=O)(O)OC[C@H](CO)O)OC(=O)CCCCCCCCCCCC	0.212978	1.0354
Plasmenyl-PC 34:2	IQACMFWAGALEAQ-WESJWMGVSA-N	6443157	CCCCCCCCCCCCCCCCOC[C@H](COP(=O)([O-])OCC[N+](C)(C)C)OC(=O)CCCCCCC/C=C\C/C=C\CCCCC	0.115494	0.84329
Plasmenyl-PC 36:6	JCIBOIAZHLGPOT-YAYDGDQKSA-N	70698851	CCCCCC/C=C\CCCCCCCC/C=C\O[C@H](COC(=O)CCCC/C=C\C/C=C\C/C=C\C/C=C\CC)COP(=O)([O-])OCC[N+](C)(C)C	0.00028141	0.795523
Plasmenyl-PC 38:5	FHHVIBPVBBRLOR-IYACIECVSA-N	24779390	CCCCCCCCCCCCCCCC/C=C\OC[C@H](COP(=O)([O-])OCC[N+](C)(C)C)OC(=O)CCC/C=C\C/C=C\C/C=C\C/C=C\CCCCC	0.80207	1.02412
Plasmenyl-PE 36:3	XVXISDREVDGQPX-PISDLAQISA-N	52925079	CCCCCCCCCCCCCCCC/C=C\OC[C@H](COP(=O)(O)OCCN)OC(=O)CCCCCCC/C=C\C/C=C\CCCCC	0.475419	0.936045
Plasmenyl-PE 36:5	UUYSKERSKRMYME-MAIXUNBTSA-N	52925126	CCCCCCCCCCCCCC/C=C\OC[C@H](COP(=O)(O)OCCN)OC(=O)CCC/C=C\C/C=C\C/C=C\C/C=C\CCCCC	0.0769442	0.855609
Plasmenyl-PE 36:6	RLLOITCRNQRGJD-DFAKUSJGSA-N	52925061	CCCCCCCCCCCCCC/C=C\OC[C@H](COP(=O)(O)OCCN)OC(=O)CCC/C=C\C/C=C\C/C=C\C/C=C\C/C=C\CC	1.77547e-05	0.438821
Plasmenyl-PE 38:5	URPXXNCTXCOATD-FXMFQVEGSA-N	86289532	CCCCCCCCCCCCCCCC/C=C\OC[C@H](COP(=O)([O-])OCC[NH3+])OC(=O)CCC/C=C\C/C=C\C/C=C\C/C=C\CCCCC	0.105839	0.881117
Plasmenyl-PE 38:6	KCNBSSYOJRUKOM-JALPNNRCSA-N	52925089	CCCCCCCCCCCCCCCC/C=C\OC[C@H](COP(=O)(O)OCCN)OC(=O)CCC/C=C\C/C=C\C/C=C\C/C=C\C/C=C\CC	0.0365462	0.839866
Plasmenyl-PE 38:7	WVGALBKSWOUIEZ-XNHMFJFDSA-N	5283497	CCCCCCCCCCCCCC/C=C\OC[C@H](COP(=O)(O)OCCN)OC(=O)CC/C=C\C/C=C\C/C=C\C/C=C\C/C=C\C/C=C\CC	3.761e-06	0.592449
Plasmenyl-PE 40:6	CVCZYWPCMUWTNS-IXKBFPPMSA-N	52925119	CCCCCCCCCCCCCCCCCC/C=C\OC[C@H](COP(=O)(O)OCCN)OC(=O)CCC/C=C\C/C=C\C/C=C\C/C=C\C/C=C\CC	0.248881	0.832321
Plasmenyl-PE 40:7	FIJFPUAJUDAZEY-MNDXXDKYSA-N	42607458	CCCCCCCCCCCCCCCC/C=C\OC[C@H](COP(=O)(O)OCCN)OC(=O)CC/C=C\C/C=C\C/C=C\C/C=C\C/C=C\C/C=C\CC	2.32767e-05	0.627541
PS 38:3	BQBTWCBZEKRLFP-BGFRNLFWSA-N	52925523	CCCCCCCCCCCCCCCCCCCC(=O)O[C@H](COC(=O)CCCCCCC/C=C\C/C=C\C/C=C\CC)COP(=O)(O)OC[C@@H](C(=O)O)N	0.05865	0.957452
PS 38:4	SVOUGFFDROZBJI-DNALCEECSA-N	24779545	CCCCCCCCCCCCCCCCCC(=O)OC[C@H](COP(=O)(O)OC[C@@H](C(=O)O)N)OC(=O)CCC/C=C\C/C=C\C/C=C\C/C=C\CCCCC	0.591738	1.00853
PS 40:3	BTIQFPURPAGQHS-HOSNKBABSA-N	52925502	CCCCCCCCCCCCCCCCCCCCCC(=O)O[C@H](COC(=O)CCCC/C=C\C/C=C\C/C=C\CCCCC)COP(=O)(O)OC[C@@H](C(=O)O)N	0.475419	0.965998
PS 40:4	GBBNRADSWUALEU-AEDAHVLISA-N	52925748	CCCCCCCCCCCCCCCCCCCC(=O)O[C@H](COC(=O)CCC/C=C\C/C=C\C/C=C\C/C=C\CCCCC)COP(=O)(O)OC[C@@H](C(=O)O)N	0.213197	1.02545
PS 40:6	LYYHRRPTEXPVOR-SYEOQEKUSA-N	24779546	CCCCCCCCCCCCCCCCCC(=O)OC[C@H](COP(=O)(O)OC[C@@H](C(=O)O)N)OC(=O)CC/C=C\C/C=C\C/C=C\C/C=C\C/C=C\C/C=C\CC	0.00379583	1.08492
PS 42:5	VNQACVFLMLYTLE-WDLXSBMRSA-N	52925755	CCCCCCCCCC/C=C\CCCCCCCCCC(=O)O[C@H](COC(=O)CCC/C=C\C/C=C\C/C=C\C/C=C\CCCCC)COP(=O)(O)OC[C@@H](C(=O)O)N	0.434164	1.04897
PS 42:6	WOBFEYJLJCLDBR-NISVGTQTSA-N	52925756	CCCCC/C=C\C/C=C\CCCCCCCCCCCC(=O)O[C@H](COC(=O)CCC/C=C\C/C=C\C/C=C\C/C=C\CCCCC)COP(=O)(O)OC[C@@H](C(=O)O)N	0.00505039	1.1463
PS 42:8	ROCNHMAZFKRILY-PRDJOCNNSA-N	52925757	CCCCC/C=C\C/C=C\C/C=C\C/C=C\CCCCCC(=O)O[C@H](COC(=O)CCC/C=C\C/C=C\C/C=C\C/C=C\CCCCC)COP(=O)(O)OC[C@@H](C(=O)O)N	0.00215199	0.774225
PS p34:0	OHPHIZCKAAJKOG-PBSRCHRYSA-N	52926194	CCCCCCCCCCCCCCCCCC(=O)O[C@H](CO/C=C\CCCCCCCCCCCCCC)COP(=O)(O)OC[C@@H](C(=O)O)N	0.475419	1.01368
SM 33:1	LQINJRUGTUOHGS-YPDYIYJKSA-N	52931139	CCCCCCCCCCCCCCC(=O)N[C@@H](COP(=O)([O-])OCC[N+](C)(C)C)[C@@H](/C=C/CCCCCCCCCCCCC)O	0.56119	1.03836
SM 34:0	QHZIGNLCLJPLCU-QPPIDDCLSA-N	9939965	CCCCCCCCCCCCCCC[C@H]([C@H](COP(=O)([O-])OCC[N+](C)(C)C)NC(=O)CCCCCCCCCCCCCCC)O	0.208542	0.869643
SM d16:1/20:0	LKQLRGMMMAHREN-YJFXYUILSA-N	6453725	CCCCCCCCCCCCCCCCCC(=O)N[C@@H](COP(=O)([O-])OCC[N+](C)(C)C)[C@@H](/C=C/CCCCCCCCCCCCC)O	0.269616	0.949512
SM d16:1/20:1	NBEADXWAAWCCDG-QDDWGVBQSA-N	6443882	CCCCCCCCCCCCC/C=C/[C@H]([C@H](COP(=O)([O-])OCC[N+](C)(C)C)NC(=O)CCCCCCC/C=C\CCCCCCCC)O	0.915207	1.00639
SM d18:1/14:0	KYICBZWZQPCUMO-PSALXKTOSA-N	11433862	CCCCCCCCCCCCC/C=C/[C@H]([C@H](COP(=O)([O-])OCC[N+](C)(C)C)NC(=O)CCCCCCCCCCCCC)O	0.737402	0.971367
SM d18:1/16:0	RWKUXQNLWDTSLO-GWQJGLRPSA-N	9939941	CCCCCCCCCCCCCCCC(=O)N[C@@H](COP(=O)([O-])OCC[N+](C)(C)C)[C@@H](/C=C/CCCCCCCCCCCCC)O	0.05865	0.942448
SM d18:1/16:1	YLWSJLLZUHSIEA-CKSUKHGVSA-N	52931235	CCCCCCCCCCCCCCCC(=O)N[C@@H](COP(=O)([O-])OCC[N+](C)(C)C)[C@@H](/C=C/CCCCCCCC/C=C\CCC)O	0.0756814	0.930673
SM (d18:1/18:0)	LKQLRGMMMAHREN-YJFXYUILSA-N	6453725	CCCCCCCCCCCCCCCCCC(=O)N[C@@H](COP(=O)([O-])OCC[N+](C)(C)C)[C@@H](/C=C/CCCCCCCCCCCCC)O	0.345919	0.947214
SM (d18:1/18:1)	NBEADXWAAWCCDG-QDDWGVBQSA-N	6443882	CCCCCCCCCCCCC/C=C/[C@H]([C@H](COP(=O)([O-])OCC[N+](C)(C)C)NC(=O)CCCCCCC/C=C\CCCCCCCC)O	0.978642	1.00183
SM d18:1/20:0	AADLTHQNYQJHQV-SVLGDMRNSA-N	44260124	CCCCCCCCCCCCCCCCCCCC(=O)N[C@@H](COP(=O)([O-])OCC[N+](C)(C)C)[C@@H](/C=C/CCCCCCCCCCCCC)O	0.0711068	0.909722
SM (d18:1/20:1)	MDRFMTLYKHBJTF-NQYLGBTJSA-N	52931179	CCCCCCCCCCCCC/C=C/[C@H]([C@H](COP(=O)([O-])OCC[N+](C)(C)C)NC(=O)CCCCCCCCC/C=C\CCCCCCCC)O	0.0893001	0.92614
SM d18:1/21:0	YXSZOBWVQJIWNE-QVDCKBILSA-N	52931193	CCCCCCCCCCCCCCCCCCCCC(=O)N[C@@H](COP(=O)([O-])OCC[N+](C)(C)C)[C@@H](/C=C/CCCCCCCCCCCCC)O	0.19211	1.11902
SM d18:1/22:0	FJJANLYCZUNFSE-TWKUQIQBSA-N	44260125	CCCCCCCCCCCCCCCCCCCCCC(=O)N[C@@H](COP(=O)([O-])OCC[N+](C)(C)C)[C@@H](/C=C/CCCCCCCCCCCCC)O	0.214833	0.95341
SM d18:1/23:0	SXZWBNWTCVLZJN-NMIJJABPSA-N	46891684	CCCCCCCCCCCCCCCCCCCCCCC(=O)N[C@@H](COP(=O)([O-])OCC[N+](C)(C)C)[C@@H](/C=C/CCCCCCCCCCCCC)O	0.284084	1.05927
SM d18:1/24:0	QEDPUVGSSDPBMD-XTAIVQBESA-N	44260127	CCCCCCCCCCCCCCCCCCCCCCCC(=O)N[C@@H](COP(=O)([O-])OCC[N+](C)(C)C)[C@@H](/C=C/CCCCCCCCCCCCC)O	0.393112	0.90994
SM d18:2/23:0	JBDGKEXQKCCQFK-JWQIMADESA-N	52931209	CCCCCCCCCCCCCCCCCCCCCCC(=O)N[C@@H](COP(=O)([O-])OCC[N+](C)(C)C)[C@@H](/C=C/CCCCCCCC/C=C\CCC)O	0.599407	0.974631
SM d18:2/24:0	DACOGJMBYLZYDH-GXJPFUDISA-N	52931217	CCCCCCCCCCCCCCCCCCCCCCCC(=O)N[C@@H](COP(=O)([O-])OCC[N+](C)(C)C)[C@@H](/C=C/CCCCCCCC/C=C\CCC)O	3.73418e-07	0.690196
SM (d18:2/24:1)	TXFLWJQVQCDUDZ-BRUGZULGSA-N	52931215	CCCCCCCC/C=C\CCCCCCCCCCCCCC(=O)N[C@@H](COP(=O)([O-])OCC[N+](C)(C)C)[C@@H](/C=C/CCCCCCCC/C=C\CCC)O	1.75841e-06	0.783623
TG 42:0	DUXYWXYOBMKGIN-UHFFFAOYSA-N	11148	CCCCCCCCCCCCCC(=O)OCC(COC(=O)CCCCCCCCCCCCC)OC(=O)CCCCCCCCCCCCC	0.0646528	1.91332
TG 44:1	UZLGGKDLJGDGEY-WVSHCNQOSA-N	56936554	CCCCCCCCCCCCCC(=O)OC[C@H](COC(=O)CCCCCCC/C=C\CCCCCC)OC(=O)CCCCCCCCCCCCC	0.0343047	1.98367
TG 46:0	JWVXCFSNEOMSHH-YACUFSJGSA-N	91865745	CCCCCCCCCCCCCCCC(=O)OC[C@@H](COC(=O)CCCCCCCCCCCCC)OC(=O)CCCCCCCCCCCCCCC	0.0158258	1.80651
TG 46:1	RSDIQTNCDWUNDP-JHXSWNAYSA-N	56936558	CCCCCCCCCCCCCC(=O)OC[C@H](COC(=O)CCCCCCC/C=C\CCCCCCCC)OC(=O)CCCCCCCCCCCCC	0.065762	1.65332
TG 46:2	XUEMVUXNOCIHLG-MOFPORNTSA-N	56936582	CCCCCCCCCCCCCC(=O)OC[C@H](COC(=O)CCCCCCC/C=C\CCCCCC)OC(=O)CCCCCCC/C=C\CCCCCC	0.0148888	2.01563
TG 46:3	AQARPXOEHQBBQN-OJJDTYCWSA-N	56936561	CCCCCCCCCCCCCC(=O)OC[C@H](COC(=O)CCCCCCC/C=C\C/C=C\C/C=C\CC)OC(=O)CCCCCCCCCCCCC	0.00325468	2.1135
TG 48:0	PVNIQBQSYATKKL-UHFFFAOYSA-N	11147	CCCCCCCCCCCCCCCC(=O)OCC(COC(=O)CCCCCCCCCCCCCCC)OC(=O)CCCCCCCCCCCCCCC	0.0316497	1.4736
TG 48:1	FEKLSEFRUGWUOS-DLOIZKPKSA-N	9543986	CCCCCCCCCCCCCCCC(=O)OC[C@H](COC(=O)CCCCCCC/C=C\CCCCCC)OC(=O)CCCCCCCCCCCCCCC	0.00711841	1.59489
TG 48:2	RUOVJPPUXXFZPC-YZEIBMOJSA-N	9543987	CCCCCCCCCCCCCCCC(=O)OC[C@H](COC(=O)CCCCCCC/C=C\CCCCCC)OC(=O)CCCCCCC/C=C\CCCCCC	0.00325468	1.79677
TG 48:3	SKGWNZXOCSYJQL-BUTYCLJRSA-N	9543989	CCCCCC/C=C\CCCCCCCC(=O)OCC(OC(=O)CCCCCCC/C=C\CCCCCC)COC(=O)CCCCCCC/C=C\CCCCCC	0.00454456	2.03559
TG 49:0	TTWJTJMWHOYBPQ-ANFMRNGASA-N	9543988	CCCCCCCCCCCCCCCCC(=O)OC[C@@H](COC(=O)CCCCCCCCCCCCCCC)OC(=O)CCCCCCCCCCCCCCC	0.00325468	1.93406
TG 49:1	VYYGQDOPVVYUKW-UKFBYESTSA-N	9543991	CCCCCCCCCCCCCCCC(=O)OC[C@H](COC(=O)CCCCCCC/C=C\CCCCCCC)OC(=O)CCCCCCCCCCCCCCC	0.000231761	2.12486
TG 49:2	QZYSUBAQYSVFNX-PSMULLBHSA-N	9543993	CCCCCCCCCCCCCCCCC(=O)OC[C@@H](COC(=O)CCCCCCC/C=C\CCCCCC)OC(=O)CCCCCCC/C=C\CCCCCC	1.38359e-05	2.03985
TG 50:0	QRJMBNGGFSPTQP-BXJPYAOGSA-N	3246958	[2H]C([2H])(C([2H])(C([2H])([2H])OC(=O)CCCCCCCCCCCCCCC)OC(=O)CCCCCCCCCCCCCCCCC)OC(=O)CCCCCCCCCCCCCCC	0.0365462	1.69268
TG 50:1	YHMDGPZOSGBQRH-YYSBDVFPSA-N	25240460	CCCCCCCCCCCCCCCC(=O)OC[C@H](COC(=O)CCCCCCC/C=C\CCCCCCCC)OC(=O)CCCCCCCCCCCCCCC	0.031649	1.25702
TG 50:2	QEZWFCZNHWUARW-XQCAQTCHSA-N	9544010	CCCCCCCCCCCCCCCCCC(=O)OC[C@@H](COC(=O)CCCCCCC/C=C\CCCCCC)OC(=O)CCCCCCC/C=C\CCCCCC	0.0024242	1.3667
TG 50:3	UFHNZOACKFBCOM-YXKNDSBASA-N	25240357	CCCCCCCC/C=C\CCCCCCCC(=O)OC[C@@H](COC(=O)CCCCCCC/C=C\CCCCCC)OC(=O)CCCCCCC/C=C\CCCCCC	5.56124e-06	2.00376
TG 50:4	PVMBAGXWHHZKFP-JMPJWMFJSA-N	25240359	CCCCCC/C=C\CCCCCCCC(=O)OC[C@H](COC(=O)CCCCCCC/C=C\C/C=C\CCCCC)OC(=O)CCCCCCC/C=C\CCCCCC	7.14646e-05	2.09305
TG 50:5	AFTBPUXZTDLRSP-UDQIKIEDSA-N	9544045	CCCCCC/C=C\CCCCCCCC(=O)OC[C@H](COC(=O)CCCCCCC/C=C\C/C=C\C/C=C\CC)OC(=O)CCCCCCC/C=C\CCCCCC	0.000961563	1.85092
TG 51:1	OZAXLAGNPZMZAD-BOEMPQCLSA-N	9544006	CCCCCCCCCCCCCCCCC(=O)OC[C@H](COC(=O)CCCCCCC/C=C\CCCCCCC)OC(=O)CCCCCCCCCCCCCCCC	0.00060141	1.9947
TG 51:2	NSNSZGBCOIKUBU-SZOKBDNISA-N	9544013	CCCCCCCCCCCCCCCCC(=O)OC[C@H](COC(=O)CCCCCCC/C=C\CCCCCCC)OC(=O)CCCCCCC/C=C\CCCCCCC	0.000145956	1.76075
TG 51:3	ISSGPXMQOMAFMJ-DMGKHJLRSA-N	9544023	CCCCCCC/C=C\CCCCCCCC(=O)OCC(OC(=O)CCCCCCC/C=C\CCCCCCC)COC(=O)CCCCCCC/C=C\CCCCCCC	8.22893e-08	2.07183
TG 51:4	IIRQXNVLAXQEKB-KBEZCZBDSA-N	9544052	CCCCCCCC/C=C\CCCCCCCC(=O)OC[C@@H](COC(=O)CCCCCCC/C=C\CCCCCC)OC(=O)CCCCCCC/C=C\C/C=C\CCCC	3.69038e-07	2.1207
TG 52:0	SDNYRTVJOFMYIW-OIVUAWODSA-N	545690	CCCCCCCCCCCCCCCCCC(=O)OC[C@@H](COC(=O)CCCCCCCCCCCCCCC)OC(=O)CCCCCCCCCCCCCCCCC	0.089684	1.55397
TG 52:1	NPCZZYKITFKRQZ-FQUZZJBASA-N	25240360	CCCCCCCCCCCCCCCCCC(=O)O[C@H](COC(=O)CCCCCCCCCCCCCCC)COC(=O)CCCCCCC/C=C\CCCCCCCC	0.0103464	1.6597
TG 52:2	KGLAHZTWGPHKFF-RISKEULASA-N	25240361	CCCCCCCCCCCCCCCC(=O)OC[C@H](COC(=O)CCCCCCC/C=C\C/C=C\CCCCC)OC(=O)CCCCCCC/C=C\CCCCCCCC	0.247729	1.05909
TG 52:3	KGLAHZTWGPHKFF-RISKEULASA-N	25240361	CCCCCCCCCCCCCCCC(=O)OC[C@H](COC(=O)CCCCCCC/C=C\C/C=C\CCCCC)OC(=O)CCCCCCC/C=C\CCCCCCCC	0.00152069	1.20205
TG 52:4	WHSWXEYWNPTUPW-HNJDVRDNSA-N	25240364	CCCCCCCC/C=C\CCCCCCCC(=O)O[C@H](COC(=O)CCCCCCC/C=C\CCCCCC)COC(=O)CCCCCCC/C=C\C/C=C\CCCCC	0.00559834	1.41465
TG 52:5	CQZAAIKPSLHIBC-KDJOUNIJSA-N	25240366	CCCCCC/C=C\CCCCCCCC(=O)OC[C@H](COC(=O)CCCCCCC/C=C\C/C=C\CCCCC)OC(=O)CCCCCCC/C=C\C/C=C\CCCCC	0.0208155	1.4628
TG 53:0	ZJUXHXMIKPSINE-IONAWPRUSA-N	9544181	CCCCCCCCCCCCCCCCCCCCC(=O)OC[C@@H](COC(=O)CCCCCCCCCCCCCCC)OC(=O)CCCCCCCCCCCCCCC	0.0158258	1.54425
TG 53:1	WWJIBIGWKGFVAQ-JNSYTQKUSA-N	9544081	CCCCCCCCCCCCCCCCCC(=O)OC[C@@H](COC(=O)CCCCCCC/C=C\CCCCCCC)OC(=O)CCCCCCCCCCCCCCCCC	0.00342698	1.94925
TG 53:2	RSINITWKVQRWSZ-RFVLVDBCSA-N	9544102	CCCCCCCCCCCCCCCCCC(=O)OC[C@@H](COC(=O)CCCCCCC/C=C\C/C=C\CCCC)OC(=O)CCCCCCCCCCCCCCCCC	0.000235107	1.58248
TG 53:3	ZNQBEJJYVJSZLM-LEDQTTRKSA-N	9544126	CCCCCCCC/C=C\CCCCCCCC(=O)OC[C@@H](COC(=O)CCCCCCC/C=C\CCCCCCC)OC(=O)CCCCCCC/C=C\CCCCCCCC	5.20726e-06	1.80754
TG 53:4	BMSDHYZLQWTKSQ-LSJAAEOESA-N	9544152	CCCCCCCC/C=C\CCCCCCCC(=O)OC[C@@H](COC(=O)CCCCCCC/C=C\C/C=C\CCCC)OC(=O)CCCCCCC/C=C\CCCCCCCC	2.48745e-07	1.82065
TG 53:5	QHYAATSKYBYSLG-BXDFBOBBSA-N	9544183	CCCCCCC/C=C\CCCCCCCC(=O)OC[C@H](COC(=O)CCCCCCC/C=C\C/C=C\CCCCC)OC(=O)CCCCCCC/C=C\C/C=C\CCCCC	0.0138539	1.60327
TG 54:0	DCXXMTOCNZCJGO-UHFFFAOYSA-N	11146	CCCCCCCCCCCCCCCCCC(=O)OCC(COC(=O)CCCCCCCCCCCCCCCCC)OC(=O)CCCCCCCCCCCCCCCCC	0.312217	1.20988
TG 54:1	YFFIQXNTTVSKJC-NZEOUKRFSA-N	16058371	CCCCCCCCCCCCCCCCCC(=O)OC[C@H](COC(=O)CCCCCCC/C=C\CCCCCCCC)OC(=O)CCCCCCCCCCCCCCCCC	0.011101	1.88304
TG 54:2	RYNHWWNZNIGDAQ-BMTCQUSZSA-N	16058372	CCCCCCCCCCCCCCCCCC(=O)OC[C@H](COC(=O)CCCCCCC/C=C\CCCCCCCC)OC(=O)CCCCCCC/C=C\CCCCCCCC	0.011101	1.50796
TG 54:3	PHYFQTYBJUILEZ-IUPFWZBJSA-N	5497163	CCCCCCCC/C=C\CCCCCCCC(=O)OCC(OC(=O)CCCCCCC/C=C\CCCCCCCC)COC(=O)CCCCCCC/C=C\CCCCCCCC	0.0148888	1.25683
TG 54:4	BRLGHZXETDWABO-NOFIOOQLSA-N	9544255	CCCCCCCCCCCCCCCCCC(=O)OC[C@H](COC(=O)CCCCCCC/C=C\C/C=C\C/C=C\CC)OC(=O)CCCCCCC/C=C\CCCCCCCC	0.0149323	1.34461
TG 54:5	VVEBTVMJPTZDHO-YQFZQLSNSA-N	25240373	CCCCCCCC/C=C\CCCCCCCC(=O)OC[C@H](COC(=O)CCCCCCC/C=C\C/C=C\CCCCC)OC(=O)CCCCCCC/C=C\C/C=C\CCCCC	0.0119727	1.45539
TG 54:6	HBOQXIRUPVQLKX-BBWANDEASA-N	5322095	CCCCC/C=C\C/C=C\CCCCCCCC(=O)OCC(OC(=O)CCCCCCC/C=C\C/C=C\CCCCC)COC(=O)CCCCCCC/C=C\C/C=C\CCCCC	0.0119727	1.77297
TG 54:8	BMPVTDWOWBNPJU-NYRSPQLFSA-N	9544413	CCCCC/C=C\C/C=C\C/C=C\C/C=C\CCCC(=O)OC[C@@H](COC(=O)CCCCCCC/C=C\C/C=C\CCCC)OC(=O)CCCCCCC/C=C\C/C=C\CCCC	0.728161	1.08325
TG 56:1	OCYFAHIHWCVZKS-FHSLLVMSSA-N	9544345	CCCCCCCCCCCCCCCCCCCC(=O)OC[C@@H](COC(=O)CCCCCCCCCCCCCCCCC)OC(=O)CCCCCCC/C=C\CCCCCCCC	0.109637	1.39504
TG 56:2	PDEQUPGHMOMBFC-FYEHETCMSA-N	9544390	CCCCCCCCCCCCCCCCCCCC(=O)OC[C@@H](COC(=O)CCCCCCCCCCCCCCCCC)OC(=O)CCCCCCC/C=C\C/C=C\CCCCC	0.0769442	1.3776
TG 56:3	QXMHHXQBBKDSSL-BAQZNRHJSA-N	9544447	CCCCCCCC/C=C\CCCCCCCCCC(=O)OC[C@@H](COC(=O)CCCCCCC/C=C\CCCCCCCC)OC(=O)CCCCCCC/C=C\CCCCCCCC	0.298663	1.19186
TG 56:4	YONCDTJKIZDSKQ-IYASBODOSA-N	25240379	CCCCCCCC/C=C\CCCCCCCCCC(=O)OC[C@@H](COC(=O)CCCCCCC/C=C\CCCCCCCC)OC(=O)CCCCCCC/C=C\C/C=C\CCCCC	0.0692346	1.45511
TG 56:5	UHEJWASONFIROS-YPSHDQQVSA-N	25240380	CCCCCCCC/C=C\CCCCCCCCCC(=O)OC[C@@H](COC(=O)CCCCCCC/C=C\C/C=C\CCCCC)OC(=O)CCCCCCC/C=C\C/C=C\CCCCC	0.174235	1.34085
TG 56:6	ZTNDRFCABXFVMY-WJTCTALZSA-N	9544625	CCCCC/C=C\C/C=C\CCCCCCCCCC(=O)OC[C@@H](COC(=O)CCCCCCC/C=C\C/C=C\CCCCC)OC(=O)CCCCCCC/C=C\C/C=C\CCCCC	0.913897	1.01742
TG 56:7	DODZUDCYRVWEOJ-GKZBLMSTSA-N	9544695	CCCCC/C=C\C/C=C\CCCCCCCC(=O)OC[C@H](COC(=O)CCCCCC/C=C\C/C=C\C/C=C\CCCCC)OC(=O)CCCCCCC/C=C\C/C=C\CCCCC	0.974161	0.993058
TG 56:8	UBGUHMDKBGQUND-VPFWBQFRSA-N	9544762	CCCCCCCCCCCCCCCC(=O)OC[C@H](COC(=O)CCC/C=C\C/C=C\C/C=C\C/C=C\CCCCC)OC(=O)CCC/C=C\C/C=C\C/C=C\C/C=C\CCCCC	0.572568	0.893294
TG 58:1	OWZMHFAFGQCCNI-FBXRAONGSA-N	25240381	CCCCCCCCCCCCCCCCCCCC(=O)OC[C@@H](COC(=O)CCCCCCC/C=C\CCCCCCCC)OC(=O)CCCCCCCCCCCCCCCCCCC	0.433464	1.17253
TG 58:2	GXWBCAVCOMAOHT-VMCJOIRWSA-N	9545277	CCCCC/C=C\C/C=C\CCCCCCCC(=O)OC[C@H](COC(=O)CCC/C=C\C/C=C\C/C=C\C/C=C\CCCCC)OC(=O)CCC/C=C\C/C=C\C/C=C\C/C=C\CCCCC	0.0848047	1.3486
TG 58:3	RFMSTHTUAZETPD-JJPHLYBUSA-N	9544748	CCCCCCCC/C=C\CCCCCCCCCC(=O)OC[C@@H](COC(=O)CCCCCCC/C=C\CCCCCCCC)OC(=O)CCCCCCCCC/C=C\CCCCCCCC	0.0207729	1.50853
TG 58:4	CCKRHDUCFMOBKX-AAINFQTBSA-N	9544835	CCCCCCCCCCCCCCCCCCCC(=O)O[C@H](COC(=O)CCCCCCCCCCCCCCCCC)COC(=O)CCC/C=C\C/C=C\C/C=C\C/C=C\CCCCC	0.248881	1.25005
TG 58:6	GSNFRUMSEHHPSY-LCXCSEBNSA-N	9544977	CCCCCCCC/C=C\CCCCCCCCCC(=O)O[C@H](COC(=O)CCCCCCC/C=C\CCCCCCCC)COC(=O)CCC/C=C\C/C=C\C/C=C\C/C=C\CCCCC	0.011101	1.47443
TG 58:8	KWIGMCRWEINBIR-HUPVKWKYSA-N	9545124	CCCCCCCCCCCCCCCCCC(=O)OC[C@H](COC(=O)CCC/C=C\C/C=C\C/C=C\C/C=C\CCCCC)OC(=O)CCC/C=C\C/C=C\C/C=C\C/C=C\CCCCC	0.831671	0.962055
TG 58:9	RVXFSLZMZOFGEQ-SWIIBWKZSA-N	9545200	CCCCCCCC/C=C\CCCCCCCC(=O)OC[C@H](COC(=O)CCC/C=C\C/C=C\C/C=C\C/C=C\CCCCC)OC(=O)CCC/C=C\C/C=C\C/C=C\C/C=C\CCCCC	0.974161	1.00817
TG 60:1	YNDXXWKSWMKVGO-HZLQDPIMSA-N	9544965	CCCCCCCCCCCCCCCCCCCC(=O)OC[C@H](COC(=O)CCCCCCCCC/C=C\CCCCCCCC)OC(=O)CCCCCCCCCCCCCCCCCCC	0.112801	1.26088
TG 60:11	ASSZWZBQIXMMKM-SYTPEAHJSA-N	9545730	CCCCC/C=C\C/C=C\C/C=C\CCCCCCC(=O)OC[C@H](COC(=O)CCC/C=C\C/C=C\C/C=C\C/C=C\CCCCC)OC(=O)CCC/C=C\C/C=C\C/C=C\C/C=C\CCCCC	0.0736924	0.742051
TG 60:2	QPNVLDQSHXVPMG-JMYPUKFOSA-N	9545040	CCCCCCCCCCCCCCCCCCCC(=O)OC[C@H](COC(=O)CCCCCCCCC/C=C\CCCCCCCC)OC(=O)CCCCCCCCC/C=C\CCCCCCCC	0.0736924	1.44049
TG 62:1	TZLOSVAFXBPUQT-VBMMIZSXSA-N	9545526	CCCCCCCCCCCCCCCCCCCCCC(=O)OC[C@H](COC(=O)CCCCCCCCCCCCCCCCCCC)OC(=O)CCCCCCCCC/C=C\CCCCCCCC	0.352235	1.12594

## Sheet: Table S10
S10. Lipidome differential abundance analysis: Cluster IV vs Cluster I at Visit -6
Compound Name	InChiKeys	Pubchem ID	SMILES	pvalue	foldchange
CE 18:1	RJECHNNFRHZQKU-RMUVNZEASA-N	5283632	CCCCCCCC/C=C\CCCCCCCC(=O)O[C@H]1CC[C@@]2([C@H]3CC[C@]4([C@H]([C@@H]3CC=C2C1)CC[C@@H]4[C@H](C)CCCC(C)C)C)C	2.39579e-07	0.60522
CE 18:2	NAACPBBQTFFYQB-LJAITQKLSA-N	5287939	CCCCC/C=C\C/C=C\CCCCCCCC(=O)O[C@H]1CC[C@@]2([C@H]3CC[C@]4([C@H]([C@@H]3CC=C2C1)CC[C@@H]4[C@H](C)CCCC(C)C)C)C	7.6189e-05	0.65503
CE 18:3	FYMCIBHUFSIWCE-WVXFKAQASA-N	6436907	CC/C=C\C/C=C\C/C=C\CCCCCCCC(=O)O[C@H]1CC[C@@]2([C@H]3CC[C@]4([C@H]([C@@H]3CC=C2C1)CC[C@@H]4[C@H](C)CCCC(C)C)C)C	9.77972e-05	0.626045
CE 20:4	IMXSFYNMSOULQS-BEDFLICRSA-N	6479222	CCCCC/C=C\C/C=C\C/C=C\C/C=C\CCCC(=O)O[C@H]1CC[C@@]2([C@H]3CC[C@]4([C@H]([C@@H]3CC=C2C1)CC[C@@H]4[C@H](C)CCCC(C)C)C)C	0.00545235	0.765
CE 22:6	VOEVEGPMRIYYKC-HNJOWPRISA-N	14274978	CC/C=C\C/C=C\C/C=C\C/C=C\C/C=C\C/C=C\CCC(=O)O[C@H]1CC[C@@]2([C@H]3CC[C@]4([C@H]([C@@H]3CC=C2C1)CC[C@@H]4[C@H](C)CCCC(C)C)C)C	1.96038e-11	0.405499
Ceramide d18:1/23:0	NAJHAHQNQCNWOP-PUYNVXOJSA-N	52931115	CCCCCCCCCCCCCCCCCCCCCCC(=O)N[C@@H](CO)[C@@H](/C=C/CCCCCCCCCCCCC)O	0.17868	1.10074
Ceramide d40:1	KEPQASGDXIEOIL-GLQCRSEXSA-N	5283567	CCCCCCCCCCCCCCCCCCCCCC(=O)N[C@@H](CO)[C@@H](/C=C/CCCCCCCCCCCCC)O	0.0985063	1.10862
Ceramide d42:1	ZJVVOYPTFQEGPH-AUTSUKAISA-N	5283571	CCCCCCCCCCCCCCCCCCCCCCCC(=O)N[C@@H](CO)[C@@H](/C=C/CCCCCCCCCCCCC)O	0.377088	1.05486
Ceramide d42:2	VJSBNBBOSZJDKB-KPEYJIHVSA-N	5283568	CCCCCCCCCCCCC/C=C/[C@H]([C@H](CO)NC(=O)CCCCCCCCCCCCC/C=C\CCCCCCCC)O	0.000156691	0.728039
Cer (d18:1/16:0)	YDNKGFDKKRUKPY-TURZORIXSA-N	5283564	CCCCCCCCCCCCCCCC(=O)N[C@@H](CO)[C@@H](/C=C/CCCCCCCCCCCCC)O	0.931401	1.00631
Cer (d18:1/22:0)	KEPQASGDXIEOIL-GLQCRSEXSA-N	5283567	CCCCCCCCCCCCCCCCCCCCCC(=O)N[C@@H](CO)[C@@H](/C=C/CCCCCCCCCCCCC)O	0.0313657	1.14409
Cer (d18:1/24:1)	VJSBNBBOSZJDKB-KPEYJIHVSA-N	5283568	CCCCCCCCCCCCC/C=C/[C@H]([C@H](CO)NC(=O)CCCCCCCCCCCCC/C=C\CCCCCCCC)O	0.000185657	0.716538
Cholesterol	HVYWMOMLDIMFJA-DPAQBDIFSA-N	5997	C[C@H](CCCC(C)C)[C@H]1CC[C@@H]2[C@@]1(CC[C@H]3[C@H]2CC=C4[C@@]3(CC[C@@H](C4)O)C)C	0.487026	1.01029
DG 32:0	JEJLGIQLPYYGEE-XIFFEERXSA-N	644078	CCCCCCCCCCCCCCCC(=O)OC[C@H](CO)OC(=O)CCCCCCCCCCCCCCC	3.88894e-05	1.56754
DG 34:0	VYQDALBEQRZDPL-DHUJRADRSA-N	3246945	CCCCCCCCCCCCCCCCCC(=O)OC[C@H](CO)OC(=O)CCCCCCCCCCCCCCC	0.00145304	1.34186
DG 34:1	YEJYLHKQOBOSCP-OZKTZCCCSA-N	5282283	CCCCCCCCCCCCCCCC(=O)OC[C@H](CO)OC(=O)CCCCCCC/C=C\CCCCCCCC	0.00110412	1.46501
DG 36:0	UHUSDOQQWJGJQS-UHFFFAOYSA-N	102615	CCCCCCCCCCCCCCCCCC(=O)OCC(CO)OC(=O)CCCCCCCCCCCCCCCCC	0.639992	0.975016
DG 36:2	AFSHUZFNMVJNKX-LLWMBOQKSA-N	9543716	CCCCCCCC/C=C\CCCCCCCC(=O)OC[C@H](CO)OC(=O)CCCCCCC/C=C\CCCCCCCC	0.0318198	1.2663
DG 36:3	BLZVZPYMHLXLHG-JOBMVARSSA-N	9543722	CCCCCCCC/C=C\CCCCCCCC(=O)OC[C@H](CO)OC(=O)CCCCCCC/C=C\C/C=C\CCCCC	7.26192e-05	1.58734
DG 38:5	GRGDLDNREYVILP-CNWVQWJYSA-N	9543784	CCCCC/C=C\C/C=C\CCCCCCCCCC(=O)O[C@@H](CO)COC(=O)CCCCCCC/C=C\C/C=C\C/C=C\CC	0.0352386	1.18555
DG 38:6	YDVDXUYJFQLPEG-CTHJWPIASA-N	9543795	CCCCC/C=C\C/C=C\C/C=C\CCCCCCC(=O)O[C@@H](CO)COC(=O)CCCCCCC/C=C\C/C=C\C/C=C\CC	0.0165072	2.04308
DG 40:1	VFUWCRMMTRWZAT-JLDYGAOKSA-N	9543793	CCCCCCCCCCCCCCCCCCCC(=O)OC[C@H](CO)OC(=O)CCCCCCCCC/C=C\CCCCCCCC	0.186292	0.903538
FA 16:0	IPCSVZSSVZVIGE-UHFFFAOYSA-N	985	CCCCCCCCCCCCCCCC(=O)O	0.177008	0.894725
FA 16:1	SECPZKHBENQXJG-FPLPWBNLSA-N	445638	CCCCCC/C=C\CCCCCCCC(=O)O	0.153503	0.708253
FA 18:0	QIQXTHQIDYTFRH-UHFFFAOYSA-N	5281	CCCCCCCCCCCCCCCCCC(=O)O	0.810347	1.03632
FA 18:1	ZQPPMHVWECSIRJ-KTKRTIGZSA-N	445639	CCCCCCCC/C=C\CCCCCCCC(=O)O	0.0566399	0.703219
FA 22:4	TWSWSIQAPQLDBP-DOFZRALJSA-N	5497181	CCCCC/C=C\C/C=C\C/C=C\C/C=C\CCCCCC(=O)O	0.877567	1.0201
GlcCer d18:1/22:0	YIGARKIIFOHVPF-YAEABVQUSA-N	6321359	CCCCCCCCCCCCCCCCCCCCCC(=O)N[C@@H](CO[C@H]1C(C([C@@H]([C@H](O1)CO)O)O)O)[C@@H](/C=C/CCCCCCCCCCCCC)O	0.0491279	0.880069
GlcCer d18:1/24:0	POQRWMRXUOPCLD-AAAFHMTMSA-N	6321361	CCCCCCCCCCCCCCCCCCCCCCCC(=O)N[C@@H](CO[C@H]1C(C([C@@H]([C@H](O1)CO)O)O)O)[C@@H](/C=C/CCCCCCCCCCCCC)O	0.00895431	0.843011
GlcCer d18:1/24:1	WBOZIXHPUPAOIA-RBELZSLISA-N	6321360	CCCCCCCCCCCCC/C=C/[C@H]([C@H](CO[C@H]1C(C([C@@H]([C@H](O1)CO)O)O)O)NC(=O)CCCCCCCCCCCCC/C=C\CCCCCCCC)O	5.24004e-06	0.635613
LPC 18:0	IHNKQIMGVNPMTC-RUZDIDTESA-N	497299	CCCCCCCCCCCCCCCCCC(=O)OC[C@H](COP(=O)([O-])OCC[N+](C)(C)C)O	0.0430577	1.23897
LPC 18:1	YAMUFBLWGFFICM-PTGWMXDISA-N	16081932	CCCCCCCC/C=C\CCCCCCCC(=O)OC[C@H](COP(=O)([O-])OCC[N+](C)(C)C)O	0.931401	1.00956
LPC 18:2	SPJFYYJXNPEZDW-FTJOPAKQSA-N	11005824	CCCCC/C=C\C/C=C\CCCCCCCC(=O)OC[C@H](COP(=O)([O-])OCC[N+](C)(C)C)O	0.286251	1.13161
LPC 20:0	UATOAILWGVYRQS-HHHXNRCGSA-N	24779473	CCCCCCCCCCCCCCCCCCCC(=O)OC[C@H](COP(=O)([O-])OCC[N+](C)(C)C)O	0.267082	1.11536
LPC 20:1	GJTDRNFWIDPARY-GTPZACKGSA-N	24779475	CCCCCCCCCC/C=C\CCCCCCCC(=O)OC[C@H](COP(=O)([O-])OCC[N+](C)(C)C)O	0.931401	0.986419
LPC 20:2	YYQVCMMXPIJVHY-ZOIJLGJPSA-N	52924053	CCCCC/C=C\C/C=C\CCCCCCCCCC(=O)OC[C@H](COP(=O)([O-])OCC[N+](C)(C)C)O	0.0941737	1.21199
LPE 18:0	BBYWOYAFBUOUFP-JOCHJYFZSA-N	46891690	CCCCCCCCCCCCCCCCCC(=O)OC[C@H](COP(=O)([O-])OCC[NH3+])O	0.13597	1.22768
LPE 18:2	DBHKHNGBVGWQJE-USWSLJGRSA-N	52925130	CCCCC/C=C\C/C=C\CCCCCCCC(=O)OC[C@H](COP(=O)(O)OCCN)O	0.0395793	1.37003
LPE 20:0	HEQMDGOBDIGJOC-XMMPIXPASA-N	52925131	CCCCCCCCCCCCCCCCCCCC(=O)OC[C@H](COP(=O)(O)OCCN)O	0.373929	1.01911
LPE 20:1	JEAGLCKGAKACCE-OPSAWKISSA-N	52925139	CCCCCCCC/C=C\CCCCCCCCCC(=O)OC[C@H](COP(=O)(O)OCCN)O	0.931401	0.99035
PC 16:0/16:0	KILNVBDSWZSGLL-KXQOOQHDSA-N	452110	CCCCCCCCCCCCCCCC(=O)OC[C@H](COP(=O)([O-])OCC[N+](C)(C)C)OC(=O)CCCCCCCCCCCCCCC	0.177008	0.937481
PC 18:1/16:0	WTJKGGKOPKCXLL-VYOBOKEXSA-N	5497103	CCCCCCCCCCCCCCCC(=O)OC[C@H](COP(=O)([O-])OCC[N+](C)(C)C)OC(=O)CCCCCCC/C=C\CCCCCCCC	0.000402188	0.886605
PC 28:0	CITHEXJVPOWHKC-UUWRZZSWSA-N	5459377	CCCCCCCCCCCCCC(=O)OC[C@H](COP(=O)([O-])OCC[N+](C)(C)C)OC(=O)CCCCCCCCCCCCC	0.931401	1.02447
PC 30:0	RFVFQQWKPSOBED-PSXMRANNSA-N	129657	CCCCCCCCCCCCCCCC(=O)O[C@H](COC(=O)CCCCCCCCCCCCC)COP(=O)([O-])OCC[N+](C)(C)C	0.877567	1.02869
PC 32:0	KILNVBDSWZSGLL-KXQOOQHDSA-N	452110	CCCCCCCCCCCCCCCC(=O)OC[C@H](COP(=O)([O-])OCC[N+](C)(C)C)OC(=O)CCCCCCCCCCCCCCC	0.0851052	0.890828
PC 32:1	QIBZFHLFHCIUOT-NPBIGWJUSA-N	6443788	CCCCCCCCCCCCCCCC(=O)OC[C@H](COP(=O)([O-])OCC[N+](C)(C)C)OC(=O)CCCCCCC/C=C\CCCCCC	0.0294549	0.811973
PC 32:2	GPWHCUUIQMGELX-VHQDNGOZSA-N	24778764	CCCCCC/C=C\CCCCCCCC(=O)OC[C@H](COP(=O)([O-])OCC[N+](C)(C)C)OC(=O)CCCCCCC/C=C\CCCCCC	0.22634	1.14873
PC 32:3	UXEFXNOSLOCOLX-ZCHSEWAGSA-N	52922763	CCCCCCCCCCCCCC(=O)O[C@H](COC(=O)CCCC/C=C\C/C=C\C/C=C\CCCCC)COP(=O)([O-])OCC[N+](C)(C)C	0.898138	0.976706
PC 33:1	GXTATYLPYLLNLV-MGIDVFSBSA-N	24778662	CCCCCCCCCCCCCCC(=O)OC[C@H](COP(=O)([O-])OCC[N+](C)(C)C)OC(=O)CCCCCCCCC/C=C\CCCCCC	0.931401	0.990571
PC 34:0	PZNPLUBHRSSFHT-RRHRGVEJSA-N	24778686	CCCCCCCCCCCCCCCCCC(=O)O[C@H](COC(=O)CCCCCCCCCCCCCCC)COP(=O)([O-])OCC[N+](C)(C)C	0.931401	1.00939
PC 34:1	WTJKGGKOPKCXLL-VYOBOKEXSA-N	5497103	CCCCCCCCCCCCCCCC(=O)OC[C@H](COP(=O)([O-])OCC[N+](C)(C)C)OC(=O)CCCCCCC/C=C\CCCCCCCC	0.0018421	0.859373
PC 34:2	JLPULHDHAOZNQI-ZTIMHPMXSA-N	5287971	CCCCCCCCCCCCCCCC(=O)OC[C@H](COP(=O)([O-])OCC[N+](C)(C)C)OC(=O)CCCCCCC/C=C\C/C=C\CCCCC	0.489541	1.01454
PC 34:3	CNNSEHUKQJCGTE-UPPWDXJYSA-N	24778699	CCCCCCCCCCCCCCCC(=O)OC[C@H](COP(=O)([O-])OCC[N+](C)(C)C)OC(=O)CCCC/C=C\C/C=C\C/C=C\CCCCC	0.249254	0.896505
PC 35:2	ZSKWZJYUVZYDQU-WESJWMGVSA-N	52922491	CCCCCCCCCCCCCCCCC(=O)OC[C@H](COP(=O)([O-])OCC[N+](C)(C)C)OC(=O)CCCCCCC/C=C\C/C=C\CCCCC	0.000304199	1.26918
PC 36:0	NRJAVPSFFCBXDT-HUESYALOSA-N	94190	CCCCCCCCCCCCCCCCCC(=O)OC[C@H](COP(=O)([O-])OCC[N+](C)(C)C)OC(=O)CCCCCCCCCCCCCCCCC	0.169448	1.12283
PC 36:1	ATHVAWFAEPLPPQ-VRDBWYNSSA-N	24778825	CCCCCCCCCCCCCCCCCC(=O)OC[C@H](COP(=O)([O-])OCC[N+](C)(C)C)OC(=O)CCCCCCC/C=C\CCCCCCCC	0.255433	0.913763
PC 36:2	SNKAWJBJQDLSFF-NVKMUCNASA-N	10350317	CCCCCCCC/C=C\CCCCCCCC(=O)OC[C@H](COP(=O)([O-])OCC[N+](C)(C)C)OC(=O)CCCCCCC/C=C\CCCCCCCC	0.160983	1.0499
PC 36:3	BXRLDROZWDUSGM-ZRYFCQOPSA-N	24778937	CCCCCCCC/C=C\CCCCCCCC(=O)OC[C@H](COP(=O)([O-])OCC[N+](C)(C)C)OC(=O)CCCC/C=C\C/C=C\CCCCCCCC	0.489278	1.04508
PC 36:4	IIZPXYDJLKNOIY-JXPKJXOSSA-N	10747814	CCCCCCCCCCCCCCCC(=O)OC[C@H](COP(=O)([O-])OCC[N+](C)(C)C)OC(=O)CCC/C=C\C/C=C\C/C=C\C/C=C\CCCCC	0.191894	1.04362
PC 36:5	DYDDZDMJSQYFGN-OIVUZXIWSA-N	24778771	CCCCCC/C=C\CCCCCCCC(=O)OC[C@H](COP(=O)([O-])OCC[N+](C)(C)C)OC(=O)CCC/C=C\C/C=C\C/C=C\C/C=C\CCCCC	0.489278	0.987858
PC 36:6	SPWBDEZMKCRQSX-NGPPOSSDSA-N	52922847	CCCCC/C=C\C/C=C\C/C=C\CCCCC(=O)O[C@H](COC(=O)CCCCCCC/C=C\C/C=C\C/C=C\CC)COP(=O)([O-])OCC[N+](C)(C)C	0.111017	0.789725
PC 37:2	MCZUABDVGPPWPM-HJTCUGKVSA-N	52922735	CCCCCCCCCCCCCCCCCCC(=O)O[C@H](COC(=O)CCCCCCC/C=C\C/C=C\CCCCC)COP(=O)([O-])OCC[N+](C)(C)C	0.0541863	1.16064
PC 37:3	OOYQEEUUQRMQKL-JUUDQZDJSA-N	52922851	CCCCCCCCCCCCCCCCCCC(=O)O[C@H](COC(=O)CCCCCCC/C=C\C/C=C\C/C=C\CC)COP(=O)([O-])OCC[N+](C)(C)C	0.111017	1.21012
PC 37:4	QRPUCJXFPYFTMB-FBFLODOBSA-N	52922853	CCCCCCCCC/C=C\CCCCCCCC(=O)O[C@H](COC(=O)CCCCCCC/C=C\C/C=C\C/C=C\CC)COP(=O)([O-])OCC[N+](C)(C)C	0.000304199	1.32112
PC 38:2	KXXLFCAPKGRXBT-FMJYHZMHSA-N	24779263	CCCCCCCCCCCCCCCCCCCC(=O)OC[C@H](COP(=O)([O-])OCC[N+](C)(C)C)OC(=O)CCCCCCC/C=C\C/C=C\CCCCC	0.744487	1.02663
PC 38:3	OJHJKEBRZSDTTL-VHWCKNCUSA-N	52922741	CCCCCCCC/C=C\CCCCCCCCCC(=O)O[C@H](COC(=O)CCCCCCC/C=C\C/C=C\CCCCC)COP(=O)([O-])OCC[N+](C)(C)C	0.980497	1.00354
PC 38:4	DNYKSJQVBCVGOF-LCKGXUDJSA-N	52923291	CCCCCCCCCCCCCCCCCC(=O)O[C@H](COC(=O)CCC/C=C\C/C=C\C/C=C\C/C=C\CCCCC)COP(=O)([O-])OCC[N+](C)(C)C	0.0608094	1.08417
PC 38:5	YLWBKBDNHWQEFU-YJXJLLHLSA-N	53479033	CCCCCC/C=C\CCCCCCCCCC(=O)O[C@H](COC(=O)CCC/C=C\C/C=C\C/C=C\C/C=C\CCCCC)COP(=O)([O-])OCC[N+](C)(C)C	0.293884	0.881395
PC 38:6	PLZBTDKJYHXIEW-DZUXOTHRSA-N	52923295	CCCCC/C=C\C/C=C\CCCCCCCC(=O)O[C@H](COC(=O)CCC/C=C\C/C=C\C/C=C\C/C=C\CCCCC)COP(=O)([O-])OCC[N+](C)(C)C	0.000185657	0.766845
PC 38:8	QQNHCRBGLPDWEW-LRFGEVPTSA-N	52922865	CC/C=C\C/C=C\C/C=C\CCCCCCCC(=O)OC[C@H](COP(=O)([O-])OCC[N+](C)(C)C)OC(=O)CCC/C=C\C/C=C\C/C=C\C/C=C\C/C=C\CC	0.000156691	0.49846
PC 40:2	AEUCYCQYAUFAKH-DITNKEBASA-N	24779063	CCCCCCCC/C=C\CCCCCCCCCC(=O)OC[C@H](COP(=O)([O-])OCC[N+](C)(C)C)OC(=O)CCCCCCCCC/C=C\CCCCCCCC	0.997308	0.999763
PC 40:5	LJFKFKIYUJNFPZ-ZLFSCUDPSA-N	52923133	CCCCCCCC/C=C\CCCCCCCCCC(=O)OC[C@H](COP(=O)([O-])OCC[N+](C)(C)C)OC(=O)CCC/C=C\C/C=C\C/C=C\C/C=C\CCCCC	0.000402188	0.708464
PC 40:6	TYRTWVKQVGNGSZ-RGBTVBCDSA-N	52923195	CCCCC/C=C\C/C=C\CCCCCCCCCC(=O)OC[C@H](COP(=O)([O-])OCC[N+](C)(C)C)OC(=O)CCC/C=C\C/C=C\C/C=C\C/C=C\CCCCC	0.356469	0.917774
PC 40:7	BPUROMFCPFGBOT-ZEGPSQTJSA-N	24778982	CCCCC/C=C\C/C=C\CCCCCCCC(=O)OC[C@H](COP(=O)([O-])OCC[N+](C)(C)C)OC(=O)CC/C=C\C/C=C\C/C=C\C/C=C\C/C=C\CCCCC	0.0314297	0.813395
PC 42:1	PAHPUCKPYBHMBM-RURDTVAGSA-N	24778881	CCCCCCCCCCCCCCCCCC(=O)OC[C@H](COP(=O)([O-])OCC[N+](C)(C)C)OC(=O)CCCCCCCCCCCCC/C=C\CCCCCCCC	0.000137234	0.767421
PC 42:4	SGYNBRXEOXADHS-CIUHTZMDSA-N	24779052	CCCCCCCCCCCCCCCCCCCC(=O)OC[C@H](COP(=O)([O-])OCC[N+](C)(C)C)OC(=O)CCCCC/C=C\C/C=C\C/C=C\C/C=C\C/C=C\CC	0.311561	1.07428
PC 42:6	DSVRMAGYENFTLY-GDDYDVMSSA-N	52923651	CCCCC/C=C\C/C=C\CCCCCCCCCC(=O)O[C@H](COC(=O)CCCCC/C=C\C/C=C\C/C=C\C/C=C\CCCCC)COP(=O)([O-])OCC[N+](C)(C)C	0.898138	1.03654
PC 44:3	GZZUNXHFXFGEBB-MXZPZXETSA-N	52923541	CCCCCCCCCC/C=C\CCCCCCCCCC(=O)OC[C@H](COP(=O)([O-])OCC[N+](C)(C)C)OC(=O)CCCCCCCCCCC/C=C\C/C=C\CCCCC	2.58962e-06	0.730831
PC 44:4	UIAAGLPOUUFIRG-ZUEQPGPOSA-N	52923481	CCCCCCCCCCCCCCCCCCCCCC(=O)OC[C@H](COP(=O)([O-])OCC[N+](C)(C)C)OC(=O)CCCCC/C=C\C/C=C\C/C=C\C/C=C\CCCCC	0.27117	0.933641
PC p34:1	OIICTMOQBYZCDA-IIKIFWEUSA-N	11125520	CCCCCCCCCCCCCCCC/C=C\OC[C@H](COP(=O)([O-])OCC[N+](C)(C)C)OC(=O)CCCCCCCCCCCCCCC	1.75803e-05	0.766404
PC p34:2	KMNVIRCHUMQGHD-RCINKDPXSA-N	52923934	CCCCCCCCCCCCCCCC/C=C\OC[C@H](COP(=O)([O-])OCC[N+](C)(C)C)OC(=O)CCCCCCC/C=C\CCCCCC	1.29404e-08	0.681547
PC p34:3	QLEHHUPUHJPURI-PWYDUFMYSA-N	24779386	CCCCCCCCCCCCCC/C=C\OC[C@H](COP(=O)([O-])OCC[N+](C)(C)C)OC(=O)CCCCCCC/C=C\C/C=C\CCCCC	0.0201377	0.826787
PC p36:3	SOUZQPFUXRVDGK-KCTKZSJBSA-N	53481701	CCCCCCCCCCCCCCCCOC[C@H](COP(=O)([O-])OCC[N+](C)(C)C)OC(=O)CCCCCC/C=C\C/C=C\C/C=C\C/C=C\CC	0.15078	0.930336
PC p36:4	IOYKZPNDXIIXLN-LOQSCQKMSA-N	24779388	CCCCCCCCCCCCCC/C=C\OC[C@H](COP(=O)([O-])OCC[N+](C)(C)C)OC(=O)CCC/C=C\C/C=C\C/C=C\C/C=C\CCCCC	0.0275554	0.853276
PC p38:3	WOSDZWBQBJHAMR-NOQLVGMBSA-N	52925093	CCCCCCCCCCCCCCCC/C=C\OC[C@H](COP(=O)(O)OCCN)OC(=O)CCCCCCCCCCC/C=C\C/C=C\CCCCC	0.693293	1.03614
PC p38:4	BAKDTVUHENQVRW-IXXGCMLPSA-N	52925117	CCCCCCCCCCCCCCCCCC/C=C\OC[C@H](COP(=O)(O)OCCN)OC(=O)CCCCCC/C=C\C/C=C\C/C=C\CCCCC	0.0625897	0.904199
PE 34:2	HBZNVZIRJWODIB-NHCUFCNUSA-N	46891780	CCCCCCCCCCCCCCCC(=O)OC[C@H](COP(=O)([O-])OCC[NH3+])OC(=O)CCCCCCC/C=C\C/C=C\CCCCC	0.00971236	1.41225
PE 36:2	DXXUYBAISOHOLM-XRIXOMQFSA-N	52924894	CCCCCCCCCCCCCCCCCC(=O)O[C@H](COC(=O)CCCCCCC/C=C\C/C=C\CCCCC)COP(=O)(O)OCCN	0.00525653	1.28838
PE 36:3	GKAFCSRKMWFPSJ-RJXNKANHSA-N	71728379	CCCCCCCC/C=C\CCCCCCCC(=O)OC[C@H](COP(=O)([O-])OCC[NH3+])OC(=O)CCCCCCC/C=C\C/C=C\CCCCC	0.943754	1.00394
PE 36:4	DUQDVNACTOXOJA-KTKXOIIHSA-N	52924875	CCCCCCCCCCCCCCCC(=O)O[C@H](COC(=O)CCC/C=C\C/C=C\C/C=C\C/C=C\CCCCC)COP(=O)(O)OCCN	0.113782	1.1747
PE 38:2	CLPMAPXZURYSNH-CNBLIUODSA-N	9546825	CCCCCCCCCCCCCCCCCCCC(=O)OC[C@H](COP(=O)(O)OCCN)OC(=O)CCCCCCC/C=C\C/C=C\CCCCC	0.000608898	1.26604
PE 38:4	ANRKEHNWXKCXDB-BHFWLYLHSA-N	46891781	CCCCCCCCCCCCCCCCCC(=O)OC[C@H](COP(=O)([O-])OCC[NH3+])OC(=O)CCC/C=C\C/C=C\C/C=C\C/C=C\CCCCC	0.000138633	1.55012
PE 38:6	LFGBKOUQHCWBQI-BZGLIJSBSA-N	52924893	CCCCC/C=C\C/C=C\CCCCCCCC(=O)OC[C@H](COP(=O)(O)OCCN)OC(=O)CCC/C=C\C/C=C\C/C=C\C/C=C\CCCCC	0.170081	0.837839
PE 40:6	FEABWDMFZNBFCT-KUVQHVNNSA-N	52924379	CCCCC/C=C\C/C=C\CCCCCCCC(=O)OC[C@H](COP(=O)(O)OCCN)OC(=O)CCCCC/C=C\C/C=C\C/C=C\C/C=C\CCCCC	0.00117563	0.796105
Phosphatidylglycerol 29:0	RYHJACYQTJIGMZ-JHOUSYSJSA-N	52926457	CCCCCCCCCCCCCCCC(=O)OC[C@H](COP(=O)(O)OC[C@H](CO)O)OC(=O)CCCCCCCCCCCC	0.931401	1.00323
Plasmenyl-PC 34:2	IQACMFWAGALEAQ-WESJWMGVSA-N	6443157	CCCCCCCCCCCCCCCCOC[C@H](COP(=O)([O-])OCC[N+](C)(C)C)OC(=O)CCCCCCC/C=C\C/C=C\CCCCC	0.201204	0.876851
Plasmenyl-PC 36:6	JCIBOIAZHLGPOT-YAYDGDQKSA-N	70698851	CCCCCC/C=C\CCCCCCCC/C=C\O[C@H](COC(=O)CCCC/C=C\C/C=C\C/C=C\C/C=C\CC)COP(=O)([O-])OCC[N+](C)(C)C	0.0260377	0.842793
Plasmenyl-PC 38:5	FHHVIBPVBBRLOR-IYACIECVSA-N	24779390	CCCCCCCCCCCCCCCC/C=C\OC[C@H](COP(=O)([O-])OCC[N+](C)(C)C)OC(=O)CCC/C=C\C/C=C\C/C=C\C/C=C\CCCCC	0.786319	1.02841
Plasmenyl-PE 36:3	XVXISDREVDGQPX-PISDLAQISA-N	52925079	CCCCCCCCCCCCCCCC/C=C\OC[C@H](COP(=O)(O)OCCN)OC(=O)CCCCCCC/C=C\C/C=C\CCCCC	0.931401	1.00894
Plasmenyl-PE 36:5	UUYSKERSKRMYME-MAIXUNBTSA-N	52925126	CCCCCCCCCCCCCC/C=C\OC[C@H](COP(=O)(O)OCCN)OC(=O)CCC/C=C\C/C=C\C/C=C\C/C=C\CCCCC	0.527951	0.937412
Plasmenyl-PE 36:6	RLLOITCRNQRGJD-DFAKUSJGSA-N	52925061	CCCCCCCCCCCCCC/C=C\OC[C@H](COP(=O)(O)OCCN)OC(=O)CCC/C=C\C/C=C\C/C=C\C/C=C\C/C=C\CC	0.000110131	0.463994
Plasmenyl-PE 38:5	URPXXNCTXCOATD-FXMFQVEGSA-N	86289532	CCCCCCCCCCCCCCCC/C=C\OC[C@H](COP(=O)([O-])OCC[NH3+])OC(=O)CCC/C=C\C/C=C\C/C=C\C/C=C\CCCCC	0.202463	0.895239
Plasmenyl-PE 38:6	KCNBSSYOJRUKOM-JALPNNRCSA-N	52925089	CCCCCCCCCCCCCCCC/C=C\OC[C@H](COP(=O)(O)OCCN)OC(=O)CCC/C=C\C/C=C\C/C=C\C/C=C\C/C=C\CC	0.330218	0.906876
Plasmenyl-PE 38:7	WVGALBKSWOUIEZ-XNHMFJFDSA-N	5283497	CCCCCCCCCCCCCC/C=C\OC[C@H](COP(=O)(O)OCCN)OC(=O)CC/C=C\C/C=C\C/C=C\C/C=C\C/C=C\C/C=C\CC	8.37122e-06	0.64029
Plasmenyl-PE 40:6	CVCZYWPCMUWTNS-IXKBFPPMSA-N	52925119	CCCCCCCCCCCCCCCCCC/C=C\OC[C@H](COP(=O)(O)OCCN)OC(=O)CCC/C=C\C/C=C\C/C=C\C/C=C\C/C=C\CC	0.203711	0.840839
Plasmenyl-PE 40:7	FIJFPUAJUDAZEY-MNDXXDKYSA-N	42607458	CCCCCCCCCCCCCCCC/C=C\OC[C@H](COP(=O)(O)OCCN)OC(=O)CC/C=C\C/C=C\C/C=C\C/C=C\C/C=C\C/C=C\CC	0.000104069	0.683542
PS 38:3	BQBTWCBZEKRLFP-BGFRNLFWSA-N	52925523	CCCCCCCCCCCCCCCCCCCC(=O)O[C@H](COC(=O)CCCCCCC/C=C\C/C=C\C/C=C\CC)COP(=O)(O)OC[C@@H](C(=O)O)N	0.0052438	0.927503
PS 38:4	SVOUGFFDROZBJI-DNALCEECSA-N	24779545	CCCCCCCCCCCCCCCCCC(=O)OC[C@H](COP(=O)(O)OC[C@@H](C(=O)O)N)OC(=O)CCC/C=C\C/C=C\C/C=C\C/C=C\CCCCC	0.216373	0.979278
PS 40:3	BTIQFPURPAGQHS-HOSNKBABSA-N	52925502	CCCCCCCCCCCCCCCCCCCCCC(=O)O[C@H](COC(=O)CCCC/C=C\C/C=C\C/C=C\CCCCC)COP(=O)(O)OC[C@@H](C(=O)O)N	0.439782	0.946015
PS 40:4	GBBNRADSWUALEU-AEDAHVLISA-N	52925748	CCCCCCCCCCCCCCCCCCCC(=O)O[C@H](COC(=O)CCC/C=C\C/C=C\C/C=C\C/C=C\CCCCC)COP(=O)(O)OC[C@@H](C(=O)O)N	0.104949	1.04892
PS 40:6	LYYHRRPTEXPVOR-SYEOQEKUSA-N	24779546	CCCCCCCCCCCCCCCCCC(=O)OC[C@H](COP(=O)(O)OC[C@@H](C(=O)O)N)OC(=O)CC/C=C\C/C=C\C/C=C\C/C=C\C/C=C\C/C=C\CC	0.110191	1.06284
PS 42:5	VNQACVFLMLYTLE-WDLXSBMRSA-N	52925755	CCCCCCCCCC/C=C\CCCCCCCCCC(=O)O[C@H](COC(=O)CCC/C=C\C/C=C\C/C=C\C/C=C\CCCCC)COP(=O)(O)OC[C@@H](C(=O)O)N	0.327481	1.07158
PS 42:6	WOBFEYJLJCLDBR-NISVGTQTSA-N	52925756	CCCCC/C=C\C/C=C\CCCCCCCCCCCC(=O)O[C@H](COC(=O)CCC/C=C\C/C=C\C/C=C\C/C=C\CCCCC)COP(=O)(O)OC[C@@H](C(=O)O)N	0.0352386	1.10534
PS 42:8	ROCNHMAZFKRILY-PRDJOCNNSA-N	52925757	CCCCC/C=C\C/C=C\C/C=C\C/C=C\CCCCCC(=O)O[C@H](COC(=O)CCC/C=C\C/C=C\C/C=C\C/C=C\CCCCC)COP(=O)(O)OC[C@@H](C(=O)O)N	0.00158976	0.799131
PS p34:0	OHPHIZCKAAJKOG-PBSRCHRYSA-N	52926194	CCCCCCCCCCCCCCCCCC(=O)O[C@H](CO/C=C\CCCCCCCCCCCCCC)COP(=O)(O)OC[C@@H](C(=O)O)N	0.695617	1.04149
SM 33:1	LQINJRUGTUOHGS-YPDYIYJKSA-N	52931139	CCCCCCCCCCCCCCC(=O)N[C@@H](COP(=O)([O-])OCC[N+](C)(C)C)[C@@H](/C=C/CCCCCCCCCCCCC)O	0.931401	0.99255
SM 34:0	QHZIGNLCLJPLCU-QPPIDDCLSA-N	9939965	CCCCCCCCCCCCCCC[C@H]([C@H](COP(=O)([O-])OCC[N+](C)(C)C)NC(=O)CCCCCCCCCCCCCCC)O	0.0352386	0.874222
SM d16:1/20:0	LKQLRGMMMAHREN-YJFXYUILSA-N	6453725	CCCCCCCCCCCCCCCCCC(=O)N[C@@H](COP(=O)([O-])OCC[N+](C)(C)C)[C@@H](/C=C/CCCCCCCCCCCCC)O	0.0132428	0.890946
SM d16:1/20:1	NBEADXWAAWCCDG-QDDWGVBQSA-N	6443882	CCCCCCCCCCCCC/C=C/[C@H]([C@H](COP(=O)([O-])OCC[N+](C)(C)C)NC(=O)CCCCCCC/C=C\CCCCCCCC)O	0.103146	0.918659
SM d18:1/14:0	KYICBZWZQPCUMO-PSALXKTOSA-N	11433862	CCCCCCCCCCCCC/C=C/[C@H]([C@H](COP(=O)([O-])OCC[N+](C)(C)C)NC(=O)CCCCCCCCCCCCC)O	0.786319	0.974433
SM d18:1/16:0	RWKUXQNLWDTSLO-GWQJGLRPSA-N	9939941	CCCCCCCCCCCCCCCC(=O)N[C@@H](COP(=O)([O-])OCC[N+](C)(C)C)[C@@H](/C=C/CCCCCCCCCCCCC)O	0.384994	0.969755
SM d18:1/16:1	YLWSJLLZUHSIEA-CKSUKHGVSA-N	52931235	CCCCCCCCCCCCCCCC(=O)N[C@@H](COP(=O)([O-])OCC[N+](C)(C)C)[C@@H](/C=C/CCCCCCCC/C=C\CCC)O	0.0429028	0.921945
SM (d18:1/18:0)	LKQLRGMMMAHREN-YJFXYUILSA-N	6453725	CCCCCCCCCCCCCCCCCC(=O)N[C@@H](COP(=O)([O-])OCC[N+](C)(C)C)[C@@H](/C=C/CCCCCCCCCCCCC)O	0.0350358	0.894607
SM (d18:1/18:1)	NBEADXWAAWCCDG-QDDWGVBQSA-N	6443882	CCCCCCCCCCCCC/C=C/[C@H]([C@H](COP(=O)([O-])OCC[N+](C)(C)C)NC(=O)CCCCCCC/C=C\CCCCCCCC)O	0.0560838	0.899243
SM d18:1/20:0	AADLTHQNYQJHQV-SVLGDMRNSA-N	44260124	CCCCCCCCCCCCCCCCCCCC(=O)N[C@@H](COP(=O)([O-])OCC[N+](C)(C)C)[C@@H](/C=C/CCCCCCCCCCCCC)O	0.165084	0.928059
SM (d18:1/20:1)	MDRFMTLYKHBJTF-NQYLGBTJSA-N	52931179	CCCCCCCCCCCCC/C=C/[C@H]([C@H](COP(=O)([O-])OCC[N+](C)(C)C)NC(=O)CCCCCCCCC/C=C\CCCCCCCC)O	0.00895431	0.88444
SM d18:1/21:0	YXSZOBWVQJIWNE-QVDCKBILSA-N	52931193	CCCCCCCCCCCCCCCCCCCCC(=O)N[C@@H](COP(=O)([O-])OCC[N+](C)(C)C)[C@@H](/C=C/CCCCCCCCCCCCC)O	0.780349	1.03042
SM d18:1/22:0	FJJANLYCZUNFSE-TWKUQIQBSA-N	44260125	CCCCCCCCCCCCCCCCCCCCCC(=O)N[C@@H](COP(=O)([O-])OCC[N+](C)(C)C)[C@@H](/C=C/CCCCCCCCCCCCC)O	0.931401	1.00614
SM d18:1/23:0	SXZWBNWTCVLZJN-NMIJJABPSA-N	46891684	CCCCCCCCCCCCCCCCCCCCCCC(=O)N[C@@H](COP(=O)([O-])OCC[N+](C)(C)C)[C@@H](/C=C/CCCCCCCCCCCCC)O	0.666508	1.02889
SM d18:1/24:0	QEDPUVGSSDPBMD-XTAIVQBESA-N	44260127	CCCCCCCCCCCCCCCCCCCCCCCC(=O)N[C@@H](COP(=O)([O-])OCC[N+](C)(C)C)[C@@H](/C=C/CCCCCCCCCCCCC)O	0.980497	1.00149
SM d18:2/23:0	JBDGKEXQKCCQFK-JWQIMADESA-N	52931209	CCCCCCCCCCCCCCCCCCCCCCC(=O)N[C@@H](COP(=O)([O-])OCC[N+](C)(C)C)[C@@H](/C=C/CCCCCCCC/C=C\CCC)O	0.0049171	0.868454
SM d18:2/24:0	DACOGJMBYLZYDH-GXJPFUDISA-N	52931217	CCCCCCCCCCCCCCCCCCCCCCCC(=O)N[C@@H](COP(=O)([O-])OCC[N+](C)(C)C)[C@@H](/C=C/CCCCCCCC/C=C\CCC)O	2.45203e-07	0.698374
SM (d18:2/24:1)	TXFLWJQVQCDUDZ-BRUGZULGSA-N	52931215	CCCCCCCC/C=C\CCCCCCCCCCCCCC(=O)N[C@@H](COP(=O)([O-])OCC[N+](C)(C)C)[C@@H](/C=C/CCCCCCCC/C=C\CCC)O	8.37122e-06	0.788175
TG 42:0	DUXYWXYOBMKGIN-UHFFFAOYSA-N	11148	CCCCCCCCCCCCCC(=O)OCC(COC(=O)CCCCCCCCCCCCC)OC(=O)CCCCCCCCCCCCC	7.29519e-05	4.79299
TG 44:1	UZLGGKDLJGDGEY-WVSHCNQOSA-N	56936554	CCCCCCCCCCCCCC(=O)OC[C@H](COC(=O)CCCCCCC/C=C\CCCCCC)OC(=O)CCCCCCCCCCCCC	0.000132718	4.58627
TG 46:0	JWVXCFSNEOMSHH-YACUFSJGSA-N	91865745	CCCCCCCCCCCCCCCC(=O)OC[C@@H](COC(=O)CCCCCCCCCCCCC)OC(=O)CCCCCCCCCCCCCCC	0.000138633	3.06397
TG 46:1	RSDIQTNCDWUNDP-JHXSWNAYSA-N	56936558	CCCCCCCCCCCCCC(=O)OC[C@H](COC(=O)CCCCCCC/C=C\CCCCCCCC)OC(=O)CCCCCCCCCCCCC	0.000771342	3.07065
TG 46:2	XUEMVUXNOCIHLG-MOFPORNTSA-N	56936582	CCCCCCCCCCCCCC(=O)OC[C@H](COC(=O)CCCCCCC/C=C\CCCCCC)OC(=O)CCCCCCC/C=C\CCCCCC	2.96059e-05	4.10232
TG 46:3	AQARPXOEHQBBQN-OJJDTYCWSA-N	56936561	CCCCCCCCCCCCCC(=O)OC[C@H](COC(=O)CCCCCCC/C=C\C/C=C\C/C=C\CC)OC(=O)CCCCCCCCCCCCC	1.75803e-05	3.95944
TG 48:0	PVNIQBQSYATKKL-UHFFFAOYSA-N	11147	CCCCCCCCCCCCCCCC(=O)OCC(COC(=O)CCCCCCCCCCCCCCC)OC(=O)CCCCCCCCCCCCCCC	0.000402188	2.07925
TG 48:1	FEKLSEFRUGWUOS-DLOIZKPKSA-N	9543986	CCCCCCCCCCCCCCCC(=O)OC[C@H](COC(=O)CCCCCCC/C=C\CCCCCC)OC(=O)CCCCCCCCCCCCCCC	0.000787283	2.02391
TG 48:2	RUOVJPPUXXFZPC-YZEIBMOJSA-N	9543987	CCCCCCCCCCCCCCCC(=O)OC[C@H](COC(=O)CCCCCCC/C=C\CCCCCC)OC(=O)CCCCCCC/C=C\CCCCCC	0.000137234	2.60457
TG 48:3	SKGWNZXOCSYJQL-BUTYCLJRSA-N	9543989	CCCCCC/C=C\CCCCCCCC(=O)OCC(OC(=O)CCCCCCC/C=C\CCCCCC)COC(=O)CCCCCCC/C=C\CCCCCC	4.75031e-05	3.34345
TG 49:0	TTWJTJMWHOYBPQ-ANFMRNGASA-N	9543988	CCCCCCCCCCCCCCCCC(=O)OC[C@@H](COC(=O)CCCCCCCCCCCCCCC)OC(=O)CCCCCCCCCCCCCCC	0.000110131	2.94131
TG 49:1	VYYGQDOPVVYUKW-UKFBYESTSA-N	9543991	CCCCCCCCCCCCCCCC(=O)OC[C@H](COC(=O)CCCCCCC/C=C\CCCCCCC)OC(=O)CCCCCCCCCCCCCCC	0.000137234	2.58845
TG 49:2	QZYSUBAQYSVFNX-PSMULLBHSA-N	9543993	CCCCCCCCCCCCCCCCC(=O)OC[C@@H](COC(=O)CCCCCCC/C=C\CCCCCC)OC(=O)CCCCCCC/C=C\CCCCCC	4.75031e-05	2.32429
TG 50:0	QRJMBNGGFSPTQP-BXJPYAOGSA-N	3246958	[2H]C([2H])(C([2H])(C([2H])([2H])OC(=O)CCCCCCCCCCCCCCC)OC(=O)CCCCCCCCCCCCCCCCC)OC(=O)CCCCCCCCCCCCCCC	4.92877e-05	3.39279
TG 50:1	YHMDGPZOSGBQRH-YYSBDVFPSA-N	25240460	CCCCCCCCCCCCCCCC(=O)OC[C@H](COC(=O)CCCCCCC/C=C\CCCCCCCC)OC(=O)CCCCCCCCCCCCCCC	0.00158976	1.36117
TG 50:2	QEZWFCZNHWUARW-XQCAQTCHSA-N	9544010	CCCCCCCCCCCCCCCCCC(=O)OC[C@@H](COC(=O)CCCCCCC/C=C\CCCCCC)OC(=O)CCCCCCC/C=C\CCCCCC	0.000459095	1.41684
TG 50:3	UFHNZOACKFBCOM-YXKNDSBASA-N	25240357	CCCCCCCC/C=C\CCCCCCCC(=O)OC[C@@H](COC(=O)CCCCCCC/C=C\CCCCCC)OC(=O)CCCCCCC/C=C\CCCCCC	4.03867e-06	2.25516
TG 50:4	PVMBAGXWHHZKFP-JMPJWMFJSA-N	25240359	CCCCCC/C=C\CCCCCCCC(=O)OC[C@H](COC(=O)CCCCCCC/C=C\C/C=C\CCCCC)OC(=O)CCCCCCC/C=C\CCCCCC	8.37122e-06	2.7064
TG 50:5	AFTBPUXZTDLRSP-UDQIKIEDSA-N	9544045	CCCCCC/C=C\CCCCCCCC(=O)OC[C@H](COC(=O)CCCCCCC/C=C\C/C=C\C/C=C\CC)OC(=O)CCCCCCC/C=C\CCCCCC	0.000230566	2.37915
TG 51:1	OZAXLAGNPZMZAD-BOEMPQCLSA-N	9544006	CCCCCCCCCCCCCCCCC(=O)OC[C@H](COC(=O)CCCCCCC/C=C\CCCCCCC)OC(=O)CCCCCCCCCCCCCCCC	0.000111609	2.58554
TG 51:2	NSNSZGBCOIKUBU-SZOKBDNISA-N	9544013	CCCCCCCCCCCCCCCCC(=O)OC[C@H](COC(=O)CCCCCCC/C=C\CCCCCCC)OC(=O)CCCCCCC/C=C\CCCCCCC	0.000180657	1.94739
TG 51:3	ISSGPXMQOMAFMJ-DMGKHJLRSA-N	9544023	CCCCCCC/C=C\CCCCCCCC(=O)OCC(OC(=O)CCCCCCC/C=C\CCCCCCC)COC(=O)CCCCCCC/C=C\CCCCCCC	4.84472e-07	2.20567
TG 51:4	IIRQXNVLAXQEKB-KBEZCZBDSA-N	9544052	CCCCCCCC/C=C\CCCCCCCC(=O)OC[C@@H](COC(=O)CCCCCCC/C=C\CCCCCC)OC(=O)CCCCCCC/C=C\C/C=C\CCCC	1.02914e-06	2.56711
TG 52:0	SDNYRTVJOFMYIW-OIVUAWODSA-N	545690	CCCCCCCCCCCCCCCCCC(=O)OC[C@@H](COC(=O)CCCCCCCCCCCCCCC)OC(=O)CCCCCCCCCCCCCCCCC	5.32862e-06	4.55459
TG 52:1	NPCZZYKITFKRQZ-FQUZZJBASA-N	25240360	CCCCCCCCCCCCCCCCCC(=O)O[C@H](COC(=O)CCCCCCCCCCCCCCC)COC(=O)CCCCCCC/C=C\CCCCCCCC	9.77972e-05	2.42059
TG 52:2	KGLAHZTWGPHKFF-RISKEULASA-N	25240361	CCCCCCCCCCCCCCCC(=O)OC[C@H](COC(=O)CCCCCCC/C=C\C/C=C\CCCCC)OC(=O)CCCCCCC/C=C\CCCCCCCC	0.0851052	1.08913
TG 52:3	KGLAHZTWGPHKFF-RISKEULASA-N	25240361	CCCCCCCCCCCCCCCC(=O)OC[C@H](COC(=O)CCCCCCC/C=C\C/C=C\CCCCC)OC(=O)CCCCCCC/C=C\CCCCCCCC	0.000748253	1.18368
TG 52:4	WHSWXEYWNPTUPW-HNJDVRDNSA-N	25240364	CCCCCCCC/C=C\CCCCCCCC(=O)O[C@H](COC(=O)CCCCCCC/C=C\CCCCCC)COC(=O)CCCCCCC/C=C\C/C=C\CCCCC	2.09077e-05	1.70496
TG 52:5	CQZAAIKPSLHIBC-KDJOUNIJSA-N	25240366	CCCCCC/C=C\CCCCCCCC(=O)OC[C@H](COC(=O)CCCCCCC/C=C\C/C=C\CCCCC)OC(=O)CCCCCCC/C=C\C/C=C\CCCCC	0.0149632	1.71356
TG 53:0	ZJUXHXMIKPSINE-IONAWPRUSA-N	9544181	CCCCCCCCCCCCCCCCCCCCC(=O)OC[C@@H](COC(=O)CCCCCCCCCCCCCCC)OC(=O)CCCCCCCCCCCCCCC	1.75803e-05	2.79658
TG 53:1	WWJIBIGWKGFVAQ-JNSYTQKUSA-N	9544081	CCCCCCCCCCCCCCCCCC(=O)OC[C@@H](COC(=O)CCCCCCC/C=C\CCCCCCC)OC(=O)CCCCCCCCCCCCCCCCC	2.76576e-05	3.59999
TG 53:2	RSINITWKVQRWSZ-RFVLVDBCSA-N	9544102	CCCCCCCCCCCCCCCCCC(=O)OC[C@@H](COC(=O)CCCCCCC/C=C\C/C=C\CCCC)OC(=O)CCCCCCCCCCCCCCCCC	0.000111609	1.82686
TG 53:3	ZNQBEJJYVJSZLM-LEDQTTRKSA-N	9544126	CCCCCCCC/C=C\CCCCCCCC(=O)OC[C@@H](COC(=O)CCCCCCC/C=C\CCCCCCC)OC(=O)CCCCCCC/C=C\CCCCCCCC	2.27197e-06	2.15759
TG 53:4	BMSDHYZLQWTKSQ-LSJAAEOESA-N	9544152	CCCCCCCC/C=C\CCCCCCCC(=O)OC[C@@H](COC(=O)CCCCCCC/C=C\C/C=C\CCCC)OC(=O)CCCCCCC/C=C\CCCCCCCC	2.45203e-07	2.13876
TG 53:5	QHYAATSKYBYSLG-BXDFBOBBSA-N	9544183	CCCCCCC/C=C\CCCCCCCC(=O)OC[C@H](COC(=O)CCCCCCC/C=C\C/C=C\CCCCC)OC(=O)CCCCCCC/C=C\C/C=C\CCCCC	2.86496e-05	2.76062
TG 54:0	DCXXMTOCNZCJGO-UHFFFAOYSA-N	11146	CCCCCCCCCCCCCCCCCC(=O)OCC(COC(=O)CCCCCCCCCCCCCCCCC)OC(=O)CCCCCCCCCCCCCCCCC	5.30009e-05	2.53317
TG 54:1	YFFIQXNTTVSKJC-NZEOUKRFSA-N	16058371	CCCCCCCCCCCCCCCCCC(=O)OC[C@H](COC(=O)CCCCCCC/C=C\CCCCCCCC)OC(=O)CCCCCCCCCCCCCCCCC	3.63799e-06	4.00479
TG 54:2	RYNHWWNZNIGDAQ-BMTCQUSZSA-N	16058372	CCCCCCCCCCCCCCCCCC(=O)OC[C@H](COC(=O)CCCCCCC/C=C\CCCCCCCC)OC(=O)CCCCCCC/C=C\CCCCCCCC	9.56107e-05	2.10407
TG 54:3	PHYFQTYBJUILEZ-IUPFWZBJSA-N	5497163	CCCCCCCC/C=C\CCCCCCCC(=O)OCC(OC(=O)CCCCCCC/C=C\CCCCCCCC)COC(=O)CCCCCCC/C=C\CCCCCCCC	0.000138633	1.4766
TG 54:4	BRLGHZXETDWABO-NOFIOOQLSA-N	9544255	CCCCCCCCCCCCCCCCCC(=O)OC[C@H](COC(=O)CCCCCCC/C=C\C/C=C\C/C=C\CC)OC(=O)CCCCCCC/C=C\CCCCCCCC	0.000103808	1.62244
TG 54:5	VVEBTVMJPTZDHO-YQFZQLSNSA-N	25240373	CCCCCCCC/C=C\CCCCCCCC(=O)OC[C@H](COC(=O)CCCCCCC/C=C\C/C=C\CCCCC)OC(=O)CCCCCCC/C=C\C/C=C\CCCCC	0.00117563	1.60851
TG 54:6	HBOQXIRUPVQLKX-BBWANDEASA-N	5322095	CCCCC/C=C\C/C=C\CCCCCCCC(=O)OCC(OC(=O)CCCCCCC/C=C\C/C=C\CCCCC)COC(=O)CCCCCCC/C=C\C/C=C\CCCCC	0.000720907	2.33583
TG 54:8	BMPVTDWOWBNPJU-NYRSPQLFSA-N	9544413	CCCCC/C=C\C/C=C\C/C=C\C/C=C\CCCC(=O)OC[C@@H](COC(=O)CCCCCCC/C=C\C/C=C\CCCC)OC(=O)CCCCCCC/C=C\C/C=C\CCCC	0.177008	1.46888
TG 56:1	OCYFAHIHWCVZKS-FHSLLVMSSA-N	9544345	CCCCCCCCCCCCCCCCCCCC(=O)OC[C@@H](COC(=O)CCCCCCCCCCCCCCCCC)OC(=O)CCCCCCC/C=C\CCCCCCCC	6.03025e-05	2.87411
TG 56:2	PDEQUPGHMOMBFC-FYEHETCMSA-N	9544390	CCCCCCCCCCCCCCCCCCCC(=O)OC[C@@H](COC(=O)CCCCCCCCCCCCCCCCC)OC(=O)CCCCCCC/C=C\C/C=C\CCCCC	0.000103808	2.56372
TG 56:3	QXMHHXQBBKDSSL-BAQZNRHJSA-N	9544447	CCCCCCCC/C=C\CCCCCCCCCC(=O)OC[C@@H](COC(=O)CCCCCCC/C=C\CCCCCCCC)OC(=O)CCCCCCC/C=C\CCCCCCCC	0.0159809	1.73917
TG 56:4	YONCDTJKIZDSKQ-IYASBODOSA-N	25240379	CCCCCCCC/C=C\CCCCCCCCCC(=O)OC[C@@H](COC(=O)CCCCCCC/C=C\CCCCCCCC)OC(=O)CCCCCCC/C=C\C/C=C\CCCCC	0.0110126	1.63617
TG 56:5	UHEJWASONFIROS-YPSHDQQVSA-N	25240380	CCCCCCCC/C=C\CCCCCCCCCC(=O)OC[C@@H](COC(=O)CCCCCCC/C=C\C/C=C\CCCCC)OC(=O)CCCCCCC/C=C\C/C=C\CCCCC	0.0608094	1.3426
TG 56:6	ZTNDRFCABXFVMY-WJTCTALZSA-N	9544625	CCCCC/C=C\C/C=C\CCCCCCCCCC(=O)OC[C@@H](COC(=O)CCCCCCC/C=C\C/C=C\CCCCC)OC(=O)CCCCCCC/C=C\C/C=C\CCCCC	0.735942	0.943314
TG 56:7	DODZUDCYRVWEOJ-GKZBLMSTSA-N	9544695	CCCCC/C=C\C/C=C\CCCCCCCC(=O)OC[C@H](COC(=O)CCCCCC/C=C\C/C=C\C/C=C\CCCCC)OC(=O)CCCCCCC/C=C\C/C=C\CCCCC	0.666508	1.07096
TG 56:8	UBGUHMDKBGQUND-VPFWBQFRSA-N	9544762	CCCCCCCCCCCCCCCC(=O)OC[C@H](COC(=O)CCC/C=C\C/C=C\C/C=C\C/C=C\CCCCC)OC(=O)CCC/C=C\C/C=C\C/C=C\C/C=C\CCCCC	0.27117	1.28464
TG 58:1	OWZMHFAFGQCCNI-FBXRAONGSA-N	25240381	CCCCCCCCCCCCCCCCCCCC(=O)OC[C@@H](COC(=O)CCCCCCC/C=C\CCCCCCCC)OC(=O)CCCCCCCCCCCCCCCCCCC	4.6398e-05	2.37998
TG 58:2	GXWBCAVCOMAOHT-VMCJOIRWSA-N	9545277	CCCCC/C=C\C/C=C\CCCCCCCC(=O)OC[C@H](COC(=O)CCC/C=C\C/C=C\C/C=C\C/C=C\CCCCC)OC(=O)CCC/C=C\C/C=C\C/C=C\C/C=C\CCCCC	0.000325646	2.24084
TG 58:3	RFMSTHTUAZETPD-JJPHLYBUSA-N	9544748	CCCCCCCC/C=C\CCCCCCCCCC(=O)OC[C@@H](COC(=O)CCCCCCC/C=C\CCCCCCCC)OC(=O)CCCCCCCCC/C=C\CCCCCCCC	6.91777e-05	2.80093
TG 58:4	CCKRHDUCFMOBKX-AAINFQTBSA-N	9544835	CCCCCCCCCCCCCCCCCCCC(=O)O[C@H](COC(=O)CCCCCCCCCCCCCCCCC)COC(=O)CCC/C=C\C/C=C\C/C=C\C/C=C\CCCCC	0.00209965	1.98842
TG 58:6	GSNFRUMSEHHPSY-LCXCSEBNSA-N	9544977	CCCCCCCC/C=C\CCCCCCCCCC(=O)O[C@H](COC(=O)CCCCCCC/C=C\CCCCCCCC)COC(=O)CCC/C=C\C/C=C\C/C=C\C/C=C\CCCCC	0.0161302	1.45431
TG 58:8	KWIGMCRWEINBIR-HUPVKWKYSA-N	9545124	CCCCCCCCCCCCCCCCCC(=O)OC[C@H](COC(=O)CCC/C=C\C/C=C\C/C=C\C/C=C\CCCCC)OC(=O)CCC/C=C\C/C=C\C/C=C\C/C=C\CCCCC	0.375358	1.1341
TG 58:9	RVXFSLZMZOFGEQ-SWIIBWKZSA-N	9545200	CCCCCCCC/C=C\CCCCCCCC(=O)OC[C@H](COC(=O)CCC/C=C\C/C=C\C/C=C\C/C=C\CCCCC)OC(=O)CCC/C=C\C/C=C\C/C=C\C/C=C\CCCCC	0.548178	1.11154
TG 60:1	YNDXXWKSWMKVGO-HZLQDPIMSA-N	9544965	CCCCCCCCCCCCCCCCCCCC(=O)OC[C@H](COC(=O)CCCCCCCCC/C=C\CCCCCCCC)OC(=O)CCCCCCCCCCCCCCCCCCC	0.000402188	2.2286
TG 60:11	ASSZWZBQIXMMKM-SYTPEAHJSA-N	9545730	CCCCC/C=C\C/C=C\C/C=C\CCCCCCC(=O)OC[C@H](COC(=O)CCC/C=C\C/C=C\C/C=C\C/C=C\CCCCC)OC(=O)CCC/C=C\C/C=C\C/C=C\C/C=C\CCCCC	0.0723228	0.766309
TG 60:2	QPNVLDQSHXVPMG-JMYPUKFOSA-N	9545040	CCCCCCCCCCCCCCCCCCCC(=O)OC[C@H](COC(=O)CCCCCCCCC/C=C\CCCCCCCC)OC(=O)CCCCCCCCC/C=C\CCCCCCCC	0.000325646	2.21986
TG 62:1	TZLOSVAFXBPUQT-VBMMIZSXSA-N	9545526	CCCCCCCCCCCCCCCCCCCCCC(=O)OC[C@H](COC(=O)CCCCCCCCCCCCCCCCCCC)OC(=O)CCCCCCCCC/C=C\CCCCCCCC	0.00108847	1.73679

[truncated: 3 more sheets: Table S11, Table S12, S13 Table]
